# Supplementary material for: iTRAQ-Based Proteomic Analysis Reveals Potential Serum Biomarkers for Pediatric Non-Hodgkin’s Lymphoma
Source: Front Oncol. 2022 Mar 17;12:848286. doi: 10.3389/fonc.2022.848286 (PMC8970600; doi:10.3389/fonc.2022.848286)
Supplement: Additional File 1 — Differentially expressed proteins identified in our study. [file Table_1.xlsx]

## Sheet: Raw
Accession Number	ProteinName	GeneName	A1	B1	A2	B2	A3	B3
APOB_HUMAN	Apolipoprotein B-100	APOB	1.1	0.9	1.1	1	1.4	1.2
CO4B_HUMAN	Complement C4-B	C4B	0.9	1	1	0.9	1	1
CERU_HUMAN	Ceruloplasmin	CP	0.9	0.9	1.2	1	0.9	0.8
AACT_HUMAN	Alpha-1-antichymotrypsin	SERPINA3	1	1	1.8	1.4	1.5	1.4
CFAH_HUMAN	Complement factor H	CFH	0.9	0.9	0.9	1	1	0.9
ITIH4_HUMAN	Inter-alpha-trypsin inhibitor heavy chain H4	ITIH4	0.8	1.1	1.4	2	1.8	2
HEMO_HUMAN	Hemopexin	HPX	1.1	1	1.1	1	1.3	1
ITIH1_HUMAN	Inter-alpha-trypsin inhibitor heavy chain H1	ITIH1	0.8	1	0.9	0.9	0.8	0.8
VTDB_HUMAN	Vitamin D-binding protein	GC	0.9	0.9	0.9	0.8	0.8	0.7
CFAB_HUMAN	Complement factor B	CFB	0.9	0.9	1.1	1.1	1.3	1.1
ITIH2_HUMAN	Inter-alpha-trypsin inhibitor heavy chain H2	ITIH2	0.9	0.9	0.9	0.8	0.8	0.8
ANT3_HUMAN	Antithrombin-III	SERPINC1	0.9	0.8	0.8	0.6	0.7	0.5
FETUA_HUMAN	Alpha-2-HS-glycoprotein	AHSG	1.1	0.8	0.7	0.6	0.5	0.4
KNG1_HUMAN	Kininogen-1	KNG1	0.9	1.1	0.9	1	0.9	1
A1BG_HUMAN	Alpha-1B-glycoprotein	A1BG	1.1	1.1	1.2	1.1	1.3	1.3
CO3_HUMAN	Complement C3	C3	1	0.9	2.2	2.2	1.9	1.9
FINC_HUMAN	Fibronectin	FN1	0.6	0.6	1.7	2.5	1.4	1.8
APOA4_HUMAN	Apolipoprotein A-IV	APOA4	1.1	1.1	0.6	0.6	0.6	0.6
APOH_HUMAN	Beta-2-glycoprotein 1	APOH	0.9	1	0.9	0.8	1.1	1
PLMN_HUMAN	Plasminogen	PLG	0.9	0.9	0.8	0.9	1	1
ZA2G_HUMAN	Zinc-alpha-2-glycoprotein	AZGP1	1.1	1.1	1.3	1.2	1.8	1.8
THRB_HUMAN	Prothrombin	F2	0.9	0.9	0.7	0.7	1	0.8
ITIH3_HUMAN	Inter-alpha-trypsin inhibitor heavy chain H3	ITIH3	0.9	0.9	1.3	1.2	1.1	1.1
VTNC_HUMAN	Vitronectin	VTN	0.9	0.9	1	1	1.1	0.9
CLUS_HUMAN	Clusterin	CLU	1	0.9	1	1	1	0.9
CFAI_HUMAN	Complement factor I	CFI	0.9	0.8	1	0.9	1.1	0.9
CO5_HUMAN	Complement C5	C5	1	1	1.1	1	1.2	1.1
C1S_HUMAN	Complement C1s subcomponent	C1S	0.8	0.7	0.9	0.9	0.8	0.9
ANGT_HUMAN	Angiotensinogen	AGT	0.9	0.9	0.9	0.9	1.2	1.2
APOE_HUMAN	Apolipoprotein E	APOE	0.8	0.9	0.8	0.9	1	1.2
CO9_HUMAN	Complement component C9	C9	0.9	1.1	1.7	1.8	1.4	1.5
CO7_HUMAN	Complement component C7	C7	0.9	0.9	0.7	0.8	1.1	1
AFAM_HUMAN	Afamin	AFM	1	1	0.7	0.9	0.9	0.9
HRG_HUMAN	Histidine-rich glycoprotein	HRG	0.9	0.9	1.1	1.3	0.7	0.6
AMBP_HUMAN	Protein AMBP	AMBP	1	1	1.1	1.1	1.4	1.3
LUM_HUMAN	Lumican	LUM	0.9	0.9	0.4	0.5	0.4	0.4
C1R_HUMAN	Complement C1r subcomponent	C1R	0.8	0.9	0.9	0.9	0.9	1
RET4_HUMAN	Retinol-binding protein 4	RBP4	1.1	0.9	0.8	0.7	0.9	0.8
CO6_HUMAN	Complement component C6	C6	0.9	0.9	0.8	0.8	0.9	0.8
CXCL7_HUMAN	Platelet basic protein	PPBP	1.1	1.1	0.8	0.8	0.8	1.1
GELS_HUMAN	Gelsolin	GSN	0.8	1	0.6	0.5	0.5	0.5
A2GL_HUMAN	Leucine-rich alpha-2-glycoprotein	LRG1	1.1	0.9	1.4	1.6	1.9	2.1
CPN2_HUMAN	Carboxypeptidase N subunit 2	CPN2	0.8	0.9	0.9	1.1	1.1	1.2
CO8A_HUMAN	Complement component C8 alpha chain	C8A	1	1	1	1	1	1
PLSL_HUMAN	Plastin-2	LCP1	0.7	0.9	2.2	2	1.2	1.3
CO8G_HUMAN	Complement component C8 gamma chain	C8G	0.7	0.7	1.2	0.9	1	0.7
FIBA_HUMAN	Fibrinogen alpha chain	FGA	1	0.9	0.6	0.5	0.6	0.6
CO2_HUMAN	Complement C2	C2	1	1.1	1.1	1.1	1.2	1.2
CO8B_HUMAN	Complement component C8 beta chain	C8B	0.8	0.9	1.2	0.8	1.3	0.9
APOA2_HUMAN	Apolipoprotein A-II	APOA2	0.8	0.9	2.7	3	3.5	3.7
IC1_HUMAN	Plasma protease C1 inhibitor	SERPING1	0.9	0.9	2	1.9	1.8	1.8
VWF_HUMAN	von Willebrand factor	VWF	0.6	0.8	1.5	1.2	1.7	1.4
KAIN_HUMAN	Kallistatin	SERPINA4	0.9	0.9	0.6	0.8	0.9	1
PEDF_HUMAN	Pigment epithelium-derived factor	SERPINF1	1	0.9	0.9	0.9	1	0.8
ACTG_HUMAN	Actin, cytoplasmic 2	ACTG1	0.9	1	1.2	1.2	1.2	1.2
CRP_HUMAN	C-reactive protein	CRP	0	0	0	0	0	0
HEP2_HUMAN	Heparin cofactor 2	SERPIND1	1	1	1	1	0.8	0.8
A2AP_HUMAN	Alpha-2-antiplasmin	SERPINF2	1	1	0.8	0.7	0.9	0.9
TETN_HUMAN	Tetranectin	CLEC3B	1	1.1	0.6	0.7	0.7	0.7
PGRP2_HUMAN	N-acetylmuramoyl-L-alanine amidase	PGLYRP2	1	1	0.7	0.7	0.7	0.7
FA5_HUMAN	Coagulation factor V	F5	0.9	1.1	1	1.3	1.1	1.1
THBG_HUMAN	Thyroxine-binding globulin	SERPINA7	1	1	0.8	0.8	0.7	0.7
TSP1_HUMAN	Thrombospondin-1	THBS1	1	1	0.7	0.7	0.8	0.9
KLKB1_HUMAN	Plasma kallikrein	KLKB1	1	0.9	0.8	0.8	0.9	0.9
ALBU_HUMAN	Serum albumin	ALB	1	0.9	0.7	0.8	1.1	1.2
ALS_HUMAN	Insulin-like growth factor-binding protein complex acid labile subunit	IGFALS	1	1.1	0.8	0.9	0.9	1
TPM4_HUMAN	Tropomyosin alpha-4 chain	TPM4	1.1	1.1	1.1	1	1.4	1.3
CBG_HUMAN	Corticosteroid-binding globulin	SERPINA6	1	1	1	1	1.1	1.1
C1QB_HUMAN	Complement C1q subcomponent subunit B	C1QB	1.1	1.2	0.9	1.1	1.1	1.3
ECM1_HUMAN	Extracellular matrix protein 1	ECM1	1.1	1	0.9	0.8	1	0.8
MOES_HUMAN	Moesin	MSN	1	1	1.4	2.2	1.6	1.9
APOL1_HUMAN	Apolipoprotein L1	APOL1	0.8	0.9	1.2	2.1	1.7	3.1
PROS_HUMAN	Vitamin K-dependent protein S	PROS1	1	0.9	0.8	0.9	0.8	0.8
S10A9_HUMAN	Protein S100-A9	S100A9	0	0	0	0	0	0
VCAM1_HUMAN	Vascular cell adhesion protein 1	VCAM1	1.1	1	0.9	1	1.1	0.9
GPX3_HUMAN	Glutathione peroxidase 3	GPX3	1	1	0.9	0.8	1.1	1.1
SHBG_HUMAN	Sex hormone-binding globulin	SHBG	1	1	0.7	0.6	0.6	0.6
CBPN_HUMAN	Carboxypeptidase N catalytic chain	CPN1	1.1	1.1	1	1.2	1	1.3
APOC3_HUMAN	Apolipoprotein C-III	APOC3	1.1	1	1.7	1.7	1.5	1.6
PERM_HUMAN	Myeloperoxidase	MPO	0.9	0.8	1.5	1.8	2	2
CO6A3_HUMAN	Collagen alpha-3(VI) chain	COL6A3	1.1	1	0.9	0.8	1	0.9
TAGL2_HUMAN	Transgelin-2	TAGLN2	0.9	0.9	0.8	0.8	1.2	1
C1QR1_HUMAN	Complement component C1q receptor	CD93	1	0	0.6	0	0.6	0
F13B_HUMAN	Coagulation factor XIII B chain	F13B	0.9	1	0.8	0.8	1	1
FA12_HUMAN	Coagulation factor XII	F12	1	1	0.6	0.5	0.8	0.8
HGFA_HUMAN	Hepatocyte growth factor activator	HGFAC	1	1	0.9	0.8	0.9	0.8
PPIA_HUMAN	Peptidyl-prolyl cis-trans isomerase A	PPIA	1	1	1.3	1.3	1.6	1.5
CADH5_HUMAN	Cadherin-5	CDH5	1	1	0.7	0.7	0.7	0.8
CNDP1_HUMAN	Beta-Ala-His dipeptidase	CNDP1	1.2	1	1.1	1.1	1.3	1.2
PON1_HUMAN	Serum paraoxonase/arylesterase 1	PON1	0.9	0.8	1.4	1	2.8	2.1
PROF1_HUMAN	Profilin-1	PFN1	0.9	0.8	1.1	1.2	1.3	1.2
LYAM1_HUMAN	L-selectin	SELL	1	1	0.9	0.8	0.9	0.8
C1QA_HUMAN	Complement C1q subcomponent subunit A	C1QA	0.8	0.9	0.7	1.2	0.6	0.9
TENX_HUMAN	Tenascin-X	TNXB	0.9	0.9	0.6	0.7	0.7	0.9
APOC2_HUMAN	Apolipoprotein C-II	APOC2	1	1	1.6	1.5	1.2	1.1
VINC_HUMAN	Vinculin	VCL	0.8	0.8	1	0.7	1	1.1
BTD_HUMAN	Biotinidase	BTD	0.9	1	0.6	0.7	0.7	0.9
CYTC_HUMAN	Cystatin-C	CST3	1	1	0.8	0.7	1	1.1
IBP3_HUMAN	Insulin-like growth factor-binding protein 3	IGFBP3	1	1	0.9	0.9	1.2	1.1
FLNA_HUMAN	Filamin-A	FLNA	1	1	1	0.9	1.5	1.2
SEPP1_HUMAN	Selenoprotein P	SEPP1	1	1	0.6	0.7	1	1.2
FIBB_HUMAN	Fibrinogen beta chain	FGB	1	0.9	0.5	0.3	0.6	0.5
ZPI_HUMAN	Protein Z-dependent protease inhibitor	SERPINA10	1.1	0.9	1.2	0.9	1.1	0.9
CHLE_HUMAN	Cholinesterase	BCHE	1.1	1	0.7	0.6	0.7	0.7
MASP1_HUMAN	Mannan-binding lectin serine protease 1	MASP1	1.1	1.1	1	0.8	1.3	0.9
FA10_HUMAN	Coagulation factor X	F10	1	1	0.8	0.8	1	0.8
CBPB2_HUMAN	Carboxypeptidase B2	CPB2	1	1	1.1	1.2	1.1	0.9
SAA1_HUMAN	Serum amyloid A-1 protein	SAA1	2.1	2	4.4	3.8	4.1	5.8
SAMP_HUMAN	Serum amyloid P-component	APCS	1	1	1.5	1.7	1.5	1.7
HGFL_HUMAN	Hepatocyte growth factor-like protein	MST1	1	1	0.8	0.7	1	1
TENA_HUMAN	Tenascin	TNC	0.9	1	0.7	0.9	1	1
APOC1_HUMAN	Apolipoprotein C-I	APOC1	1	1	1.4	1.5	1.3	1.2
TLN1_HUMAN	Talin-1	TLN1	1	0.9	1.4	1.1	1.5	1.3
COMP_HUMAN	Cartilage oligomeric matrix protein	COMP	1.1	1.1	0.5	0.5	0.6	0.4
CD44_HUMAN	CD44 antigen	CD44	1.1	1.1	0.7	1	0.6	1
CO4A_HUMAN	Complement C4-A	C4A	0.8	0.8	1	1	0.9	0.8
PRG4_HUMAN	Proteoglycan 4	PRG4	0.8	0.9	1	1	1.1	1.6
QSOX1_HUMAN	Sulfhydryl oxidase 1	QSOX1	0.9	1	1.2	1.1	1.7	1.3
PHLD_HUMAN	Phosphatidylinositol-glycan-specific phospholipase D	GPLD1	1	1	0.9	1	1	1
PLF4_HUMAN	Platelet factor 4	PF4	1	1	0.5	0.5	0.5	0.5
LBP_HUMAN	Lipopolysaccharide-binding protein	LBP	0.9	1	2.2	4.8	2.4	4.3
PI16_HUMAN	Peptidase inhibitor 16	PI16	1.1	1.1	0.3	0.2	0.3	0.2
S10A8_HUMAN	Protein S100-A8	S100A8	1	0.9	4.1	4.5	5.5	5.8
FA9_HUMAN	Coagulation factor IX	F9	1	1	0.9	1.1	1.2	1.1
CD14_HUMAN	Monocyte differentiation antigen CD14	CD14	1	1	1.2	0.9	1.5	1.2
GRP78_HUMAN	78 kDa glucose-regulated protein	HSPA5	1.1	1.1	1	1.1	1.3	1.7
FBLN1_HUMAN	Fibulin-1	FBLN1	1.1	1.1	0.8	0.8	0.8	0.6
FHR2_HUMAN	Complement factor H-related protein 2	CFHR2	1	0.9	1.1	1.1	1.1	1.1
HS90A_HUMAN	Heat shock protein HSP 90-alpha	HSP90AA1	0.7	0	3.8	8.3	2.6	4.5
CATA_HUMAN	Catalase	CAT	1.1	1	1.3	1	1.7	1.4
FETUB_HUMAN	Fetuin-B	FETUB	0.8	0.8	0.7	0.7	0.8	0.9
HABP2_HUMAN	Hyaluronan-binding protein 2	HABP2	1	1	0.7	0.7	0.9	1
ACTN1_HUMAN	Alpha-actinin-1	ACTN1	0.8	0.6	4.1	7.8	7	8.5
ENOA_HUMAN	Alpha-enolase	ENO1	0.9	0.9	1.3	2.2	1.3	3.1
MASP2_HUMAN	Mannan-binding lectin serine protease 2	MASP2	1	1	1	1.1	1.2	0.9
PGBM_HUMAN	Basement membrane-specific heparan sulfate proteoglycan core protein	HSPG2	1	1	0.7	0.7	0.9	1.5
TRY1_HUMAN	Trypsin-1	PRSS1	1	1	1	1	1.2	1.3
HYOU1_HUMAN	Hypoxia up-regulated protein 1	HYOU1	0.9	0.9	0.6	1.4	0.7	2
FA11_HUMAN	Coagulation factor XI	F11	1	1	0.6	0.6	0.7	0.9
BGH3_HUMAN	Transforming growth factor-beta-induced protein ig-h3	TGFBI	1	1.1	0.7	0.9	0.9	1.2
PLTP_HUMAN	Phospholipid transfer protein	PLTP	0.9	1	1	1	1.4	1.2
APOF_HUMAN	Apolipoprotein F	APOF	1	0.9	1.1	1.1	1.2	1
CFAD_HUMAN	Complement factor D	CFD	0.9	0.8	0.7	0.8	1.2	1.2
LDHB_HUMAN	L-lactate dehydrogenase B chain	LDHB	0.9	1	1.7	2.2	1.2	1.5
EZRI_HUMAN	Ezrin	EZR	0	0.9	0	2.9	0	2.9
1433Z_HUMAN	14-3-3 protein zeta/delta	YWHAZ	0.4	0.4	1.6	1.6	1.6	1.4
IBP2_HUMAN	Insulin-like growth factor-binding protein 2	IGFBP2	1.5	1.5	2.4	4.1	1.7	2.6
ENPL_HUMAN	Endoplasmin	HSP90B1	1	1	1	0.9	1.3	0.9
FHR1_HUMAN	Complement factor H-related protein 1	CFHR1	1	1	1.5	1.5	1.3	0.6
PROP_HUMAN	Properdin	CFP	1	1	0.8	0.9	1.1	1
MYH9_HUMAN	Myosin-9	MYH9	0	0	0	0	0	0
DHX9_HUMAN	ATP-dependent RNA helicase A	DHX9	1	1	0.6	1.1	0.7	0.9
VIME_HUMAN	Vimentin	VIM	0.9	0.9	1.8	2.1	1.5	2
A4_HUMAN	Amyloid beta A4 protein	APP	1.1	1.2	3.1	0	2.9	1.3
LRP1_HUMAN	Prolow-density lipoprotein receptor-related protein 1	LRP1	1	1	0.4	1.4	0.9	1.6
DSG2_HUMAN	Desmoglein-2	DSG2	1	1	1	1	1.3	1.1
FCGBP_HUMAN	IgGFc-binding protein	FCGBP	0.9	0.9	1	2.5	1.1	1.8
LAMB1_HUMAN	Laminin subunit beta-1	LAMB1	1.1	0.2	0.9	9	0.2	6.9
MA1A1_HUMAN	Mannosyl-oligosaccharide 1,2-alpha-mannosidase IA	MAN1A1	1	1	0.8	0.9	1	0.7
PZP_HUMAN	Pregnancy zone protein	PZP	1.2	1.3	2.5	8.6	3.8	6.7
UBR1_HUMAN	E3 ubiquitin-protein ligase UBR1	UBR1	1	1	1.2	1.2	2.1	1.7
C1RL_HUMAN	Complement C1r subcomponent-like protein	C1RL	1	1	1	0.9	1.4	1.2
CAH1_HUMAN	Carbonic anhydrase 1	CA1	0.9	0.9	1.2	1	1.9	1.4
TYB4_HUMAN	Thymosin beta-4	TMSB4X	1	1	0.8	0.7	1.3	1.2
FCN3_HUMAN	Ficolin-3	FCN3	1	1	1	1.3	1	1.7
FHR5_HUMAN	Complement factor H-related protein 5	CFHR5	1.1	1.1	1.3	1.4	1.7	2.4
POSTN_HUMAN	Periostin	POSTN	1	1	0.6	0.8	0.6	0.7
GP1BA_HUMAN	Platelet glycoprotein Ib alpha chain	GP1BA	1	1	0.7	0.6	0.9	0.9
ICAM1_HUMAN	Intercellular adhesion molecule 1	ICAM1	1	1	0.8	1	1.1	1.4
MBL2_HUMAN	Mannose-binding protein C	MBL2	1	1	0.8	0.9	0.5	0.6
CAP1_HUMAN	Adenylyl cyclase-associated protein 1	CAP1	1	1	1	1.1	1.2	1.9
PCSK9_HUMAN	Proprotein convertase subtilisin/kexin type 9	PCSK9	1	1	1.2	0.7	1.8	1.3
PSMD1_HUMAN	26S proteasome non-ATPase regulatory subunit 1	PSMD1	1	1	1	1.3	1.5	1.2
AMPN_HUMAN	Aminopeptidase N	ANPEP	1	1	0.8	1	0.9	1
ATRN_HUMAN	Attractin	ATRN	1.1	1.1	0.7	0.8	0.9	1.1
CRAC1_HUMAN	Cartilage acidic protein 1	CRTAC1	0.9	0.8	0.8	1.1	1	1.1
SODE_HUMAN	Extracellular superoxide dismutase [Cu-Zn]	SOD3	1.1	1.1	0.7	0.8	1.5	1.9
ENPP2_HUMAN	Ectonucleotide pyrophosphatase/phosphodiesterase family member 2	ENPP2	1.1	1	0.6	0.9	0.8	1.4
NRP1_HUMAN	Neuropilin-1	NRP1	0.9	0.9	0.5	0.8	0.6	0.8
PRDX2_HUMAN	Peroxiredoxin-2	PRDX2	1	1	0.9	0.8	1	1.2
SPRL1_HUMAN	SPARC-like protein 1	SPARCL1	1	1	1	0.8	1.4	1.5
TPIS_HUMAN	Triosephosphate isomerase	TPI1	1	1	1	2.1	1.2	2.2
CO1A1_HUMAN	Collagen alpha-1(I) chain	COL1A1	1.1	1.1	0.3	0.1	0.3	0.1
1433E_HUMAN	14-3-3 protein epsilon	YWHAE	0	0	0	0	0	0
LAMP2_HUMAN	Lysosome-associated membrane glycoprotein 2	LAMP2	0.8	0	1.1	0	1.1	29
HSP7C_HUMAN	Heat shock cognate 71 kDa protein	HSPA8	1	0.9	2.2	7.1	2.4	8.9
VASN_HUMAN	Vasorin	VASN	1	1.1	0.9	0.9	1.2	1.2
SODC_HUMAN	Superoxide dismutase [Cu-Zn]	SOD1	1	1	1.1	1	1.1	1.3
PVR_HUMAN	Poliovirus receptor	PVR	1	1	1.2	0.6	2	1.3
SRCRM_HUMAN	Scavenger receptor cysteine-rich domain-containing protein SCART1		1	1	0.8	0.8	0.7	0.7
FHAD1_HUMAN	Forkhead-associated domain-containing protein 1	FHAD1	0	0	0	0	0	0
IPSP_HUMAN	Plasma serine protease inhibitor	SERPINA5	1	1	1	1.4	1	0.7
APOA1_HUMAN	Apolipoprotein A-I	APOA1	1.1	1.1	0.8	1.4	1.2	2
APOM_HUMAN	Apolipoprotein M	APOM	1	1	1	1.4	1.4	1.3
NCAM1_HUMAN	Neural cell adhesion molecule 1	NCAM1	1.1	1	0.9	0.6	1.2	0.8
ALDOA_HUMAN	Fructose-bisphosphate aldolase A	ALDOA	1	1	1	1	1.1	1.2
NEO1_HUMAN	Neogenin	NEO1	1	1	1	0.8	1	0.9
C1QC_HUMAN	Complement C1q subcomponent subunit C	C1QC	0.9	0.9	0.8	0.8	0.8	0.9
LYSC_HUMAN	Lysozyme C	LYZ	1	1	1.1	1.4	0.9	1
ACTS_HUMAN	Actin, alpha skeletal muscle	ACTA1	1	0.9	2.1	1.2	2.3	1.5
HBB_HUMAN	Hemoglobin subunit beta	HBB	1	1	0.8	0.8	1.1	1
MUC18_HUMAN	Cell surface glycoprotein MUC18	MCAM	1.1	1.2	1	1	1.4	1.5
C163A_HUMAN	Scavenger receptor cysteine-rich type 1 protein M130	CD163	1	1	1	0.9	1.2	0.8
CATD_HUMAN	Cathepsin D	CTSD	1	1	1.1	0.8	1.5	1.3
PTPRS_HUMAN	Receptor-type tyrosine-protein phosphatase S	PTPRS	0	0	0	0	0	0
CSPG4_HUMAN	Chondroitin sulfate proteoglycan 4	CSPG4	1	0	1.1	0	1.2	0
ATS13_HUMAN	A disintegrin and metalloproteinase with thrombospondin motifs 13	ADAMTS13	1	1	1.1	0.9	1.2	1.1
NUCL_HUMAN	Nucleolin	NCL	1.3	0	2.3	24.7	2.2	14.4
PROC_HUMAN	Vitamin K-dependent protein C	PROC	1	1	1.1	1	0.9	1.1
SPRC_HUMAN	SPARC	SPARC	1	1	0.9	0.5	1.1	0.8
TRFL_HUMAN	Lactotransferrin	LTF	1	1	0.7	1	1.3	1
DOPO_HUMAN	Dopamine beta-hydroxylase	DBH	1	1	0.8	0.8	1	0.9
COF1_HUMAN	Cofilin-1	CFL1	1	1	1	0.8	1.2	1.3
CO6A1_HUMAN	Collagen alpha-1(VI) chain	COL6A1	1	0.2	0.4	4.9	0.6	0
TPM3_HUMAN	Tropomyosin alpha-3 chain	TPM3	0.6	0.6	2.2	0.8	2.8	1.5
PGAM1_HUMAN	Phosphoglycerate mutase 1	PGAM1	1	1	15.5	3.2	5.3	1.1
LMNB1_HUMAN	Lamin-B1	LMNB1	0	0	0	0	0	0
UBE2N_HUMAN	Ubiquitin-conjugating enzyme E2 N	UBE2N	1	0	0.9	0	1.1	100
PTPRF_HUMAN	Receptor-type tyrosine-protein phosphatase F	PTPRF	1	0	1.1	0	1	0
CD166_HUMAN	CD166 antigen	ALCAM	1	1	0.6	0.7	0.9	0.6
COR1A_HUMAN	Coronin-1A	CORO1A	0.6	0.6	1.8	1.3	3	2.3
LDHA_HUMAN	L-lactate dehydrogenase A chain	LDHA	0.9	0.9	2.6	2.3	2.5	1.7
TALDO_HUMAN	Transaldolase	TALDO1	0.9	0.9	1.4	1.1	1.1	1.3
IL1AP_HUMAN	Interleukin-1 receptor accessory protein	IL1RAP	1	1	0.8	0.8	1	1.1
CHL1_HUMAN	Neural cell adhesion molecule L1-like protein	CHL1	1	1	0.7	0.8	0.9	1
SAA4_HUMAN	Serum amyloid A-4 protein	SAA4	1.1	1.1	2	2	2.4	2.8
PTGDS_HUMAN	Prostaglandin-H2 D-isomerase	PTGDS	1	1	0.6	0.6	0.5	0.4
COBA2_HUMAN	Collagen alpha-2(XI) chain	COL11A2	1	1	0.6	0.4	0.9	0.4
VP13A_HUMAN	Vacuolar protein sorting-associated protein 13A	VPS13A	0	1	0	1.4	0	1.8
NUCB1_HUMAN	Nucleobindin-1	NUCB1	0	0	0	0	0	0
KIT_HUMAN	Mast/stem cell growth factor receptor Kit	KIT	1	1	0.8	1	0.4	0.6
K1C9_HUMAN	Keratin, type I cytoskeletal 9	KRT9	0	0	0	0	0	0
CALD1_HUMAN	Caldesmon	CALD1	1.2	1.1	1.2	0.6	1.8	1.2
MEGF8_HUMAN	Multiple epidermal growth factor-like domains protein 8	MEGF8	0	0	0	0	0	0
UB2V2_HUMAN	Ubiquitin-conjugating enzyme E2 variant 2	UBE2V2	1	1	0.9	0.9	1.2	1
VGFR3_HUMAN	Vascular endothelial growth factor receptor 3	FLT4	1	0	1	0	0.9	0
APOC4_HUMAN	Apolipoprotein C-IV	APOC4	1	1	1.3	2.5	1.1	2.7
PTPRJ_HUMAN	Receptor-type tyrosine-protein phosphatase eta	PTPRJ	1	1	0.7	1.2	0.8	1.5
CALR_HUMAN	Calreticulin	CALR	1.1	1.1	0.8	1.4	1.1	1.5
GPV_HUMAN	Platelet glycoprotein V	GP5	1	1	1.4	0.8	0.6	1
1433G_HUMAN	14-3-3 protein gamma	YWHAG	1	1	1.5	2.1	2.3	3
TRML1_HUMAN	Trem-like transcript 1 protein	TREML1	1	1	1.2	1.3	1.3	1.2
LRRF2_HUMAN	Leucine-rich repeat flightless-interacting protein 2	LRRFIP2	1	1	1.1	1.2	1.4	1.7
CE162_HUMAN	Centrosomal protein of 162 kDa	KIAA1009	1	0	0.9	0	1.6	0
LTBP1_HUMAN	Latent-transforming growth factor beta-binding protein 1	LTBP1	0	1	0	1.2	0	1.2
CAD13_HUMAN	Cadherin-13	CDH13	1	1	0.9	0.8	0.9	1.4
TKT_HUMAN	Transketolase	TKT	1.1	1.1	1.2	1.4	1.3	1.3
CAH2_HUMAN	Carbonic anhydrase 2	CA2	0.9	1	1.2	1.4	1.7	1.8
F13A_HUMAN	Coagulation factor XIII A chain	F13A1	1.1	1.1	0.8	0.8	1.1	0.8
ALDOB_HUMAN	Fructose-bisphosphate aldolase B	ALDOB	1	1	1	1.1	1.2	1.7
B2MG_HUMAN	Beta-2-microglobulin	B2M	1	1	0.9	0.8	0.5	0.4
GOLM1_HUMAN	Golgi membrane protein 1	GOLM1	1	1	0.8	0.4	0.9	0
GDIR1_HUMAN	Rho GDP-dissociation inhibitor 1	ARHGDIA	0.8	0.8	1.9	0.8	1.5	0.5
PROZ_HUMAN	Vitamin K-dependent protein Z	PROZ	1.1	1.1	1.1	1.3	1.4	1.8
PCOC1_HUMAN	Procollagen C-endopeptidase enhancer 1	PCOLCE	1	1	0.5	1	0.7	0.8
CI050_HUMAN	Uncharacterized protein C9orf50	C9orf50	1	0	0.8	0	1	0
GNPTG_HUMAN	N-acetylglucosamine-1-phosphotransferase subunit gamma	GNPTG	0.9	0.9	1.1	1.7	1.1	1.9
BLMH_HUMAN	Bleomycin hydrolase	BLMH	0.7	0	0.9	20.7	0.3	17.2
CADH1_HUMAN	Cadherin-1	CDH1	1	1	1	0.6	0.9	1.2
HEG1_HUMAN	Protein HEG homolog 1	HEG1	1	0.9	1.3	1.8	0	2.4
PABP1_HUMAN	Polyadenylate-binding protein 1	PABPC1	0	0	0	0	0	0
NOE1_HUMAN	Noelin	OLFM1	1	0	0.6	0	0.8	0
G6PI_HUMAN	Glucose-6-phosphate isomerase	GPI	1	1	5.4	1.9	4	1.8
ANXA1_HUMAN	Annexin A1	ANXA1	0	0	0	0	0	0
FIBG_HUMAN	Fibrinogen gamma chain	FGG	0.9	0.9	0.5	0.6	0.6	0.6
FSTL1_HUMAN	Follistatin-related protein 1	FSTL1	0	0	0	0	0	0
NID1_HUMAN	Nidogen-1	NID1	1	1	0.7	1.5	0.8	2.1
HBA_HUMAN	Hemoglobin subunit alpha	HBA1	1	1	0.8	1	1	1
GGH_HUMAN	Gamma-glutamyl hydrolase	GGH	1	1	0.9	2.4	0.7	0.7
COTL1_HUMAN	Coactosin-like protein	COTL1	1.5	1.4	2	2.2	2	1.2
LASP1_HUMAN	LIM and SH3 domain protein 1	LASP1	1	1.1	1	3.4	1.4	4
VASP_HUMAN	Vasodilator-stimulated phosphoprotein	VASP	1.2	1.2	1	1.6	1.7	3.4
ITA6_HUMAN	Integrin alpha-6	ITGA6	0	0	0	0	0	0
WDR87_HUMAN	WD repeat-containing protein 87	WDR87	1	0	1.5	0	1.4	0
PDIA1_HUMAN	Protein disulfide-isomerase	P4HB	1	1	1	0.7	1.4	0.7
C4BPA_HUMAN	C4b-binding protein alpha chain	C4BPA	0.8	0.8	1	1.1	1.1	0.9
STMN1_HUMAN	Stathmin	STMN1	0	2.1	100	21.1	100	10.2
THIO_HUMAN	Thioredoxin	TXN	1	1.1	1.3	0	1.3	2.4
PPBT_HUMAN	Alkaline phosphatase, tissue-nonspecific isozyme	ALPL	1	1	0.8	1	0.7	1
DBNL_HUMAN	Drebrin-like protein	DBNL	0	1	0	0.5	42.6	1.3
KKCC2_HUMAN	Calcium/calmodulin-dependent protein kinase kinase 2	CAMKK2	0	0	0	0	0	0
APOA_HUMAN	Apolipoprotein(a)	LPA	1	0	1	0	0.4	0
LAMA2_HUMAN	Laminin subunit alpha-2	LAMA2	1	0	1.7	0	0	0
ACY1_HUMAN	Aminoacylase-1	ACY1	0	1	0	0.4	0	0.6
MYH11_HUMAN	Myosin-11	MYH11	1	0	0.5	0	1	0
NINL_HUMAN	Ninein-like protein	NINL	0	1	0	0.7	0	1.1
RHG23_HUMAN	Rho GTPase-activating protein 23	ARHGAP23	0	1	0	1.1	0	1.2
ICAM2_HUMAN	Intercellular adhesion molecule 2	ICAM2	1.1	1.1	0.7	0.8	1.1	0.7
RARR2_HUMAN	Retinoic acid receptor responder protein 2	RARRES2	1	1	1	0.8	1.2	0.8
FCG3A_HUMAN	Low affinity immunoglobulin gamma Fc region receptor III-A	FCGR3A	0.9	0.9	0.8	1.1	1	1
CSF1R_HUMAN	Macrophage colony-stimulating factor 1 receptor	CSF1R	1.3	1.3	1.4	1.1	2.3	1.8
BASP1_HUMAN	Brain acid soluble protein 1	BASP1	1	1	1.9	1.7	1.4	1
LG3BP_HUMAN	Galectin-3-binding protein	LGALS3BP	0.1	1	47.3	0.8	62.1	0.9
ROA1_HUMAN	Heterogeneous nuclear ribonucleoprotein A1	HNRNPA1	0.4	0	2.8	0	1.1	0
SH3L3_HUMAN	SH3 domain-binding glutamic acid-rich-like protein 3	SH3BGRL3	1	1	1.2	0.7	1.2	0.6
ROA2_HUMAN	Heterogeneous nuclear ribonucleoproteins A2/B1	HNRNPA2B1	0	1	0	1.2	0	1.2
CALM_HUMAN	Calmodulin	CALM1	1.1	1.1	0.8	1.1	1.1	0.9
CLC11_HUMAN	C-type lectin domain family 11 member A	CLEC11A	1	1	1.5	0.9	2.7	0.9
EPHA7_HUMAN	Ephrin type-A receptor 7	EPHA7	0	0	0	0	0	0
BAHC1_HUMAN	BAH and coiled-coil domain-containing protein 1	BAHCC1	0	0	0	0	0	0
HENMT_HUMAN	Small RNA 2'-O-methyltransferase	HENMT1	1	0	0	0	1.3	0
ASCC2_HUMAN	Activating signal cointegrator 1 complex subunit 2	ASCC2	1	0	0.9	0	1.2	0
K22E_HUMAN	Keratin, type II cytoskeletal 2 epidermal	KRT2	0	0	0	0	0	0
SDPR_HUMAN	Serum deprivation-response protein	SDPR	1	1	0.6	1	0.9	1.3
HSP71_HUMAN	Heat shock 70 kDa protein 1A/1B	HSPA1A	0	0	0	0	0	0
MRC1_HUMAN	Macrophage mannose receptor 1	MRC1	1	1	1.1	1.1	0.8	2.2
PGK1_HUMAN	Phosphoglycerate kinase 1	PGK1	1	1	1.9	1.1	2	1.5
PTPRG_HUMAN	Receptor-type tyrosine-protein phosphatase gamma	PTPRG	1	1	0	0.7	0	0.6
FBLN3_HUMAN	EGF-containing fibulin-like extracellular matrix protein 1	EFEMP1	1.4	1.4	1.2	1.6	1.1	2.1
DEF3_HUMAN	Neutrophil defensin 3	DEFA3	0	1	70.5	2.6	0	2.7
HNRPK_HUMAN	Heterogeneous nuclear ribonucleoprotein K	HNRNPK	0.9	0.9	0.7	1.5	0	2.2
GSTP1_HUMAN	Glutathione S-transferase P	GSTP1	0	0	0	0	0	0
SIA7A_HUMAN	Alpha-N-acetylgalactosaminide alpha-2,6-sialyltransferase 1	ST6GALNAC1	1	0	1.1	0	1	0
ADIPO_HUMAN	Adiponectin	ADIPOQ	1	1	0.5	0.8	1	1
BMP1_HUMAN	Bone morphogenetic protein 1	BMP1	0	0	0	0	0	0
KIF2A_HUMAN	Kinesin-like protein KIF2A	KIF2A	0	1	0	0.6	0	1.3
DEN4B_HUMAN	DENN domain-containing protein 4B	DENND4B	1	0	0.8	0	1.1	0
UBA1_HUMAN	Ubiquitin-like modifier-activating enzyme 1	UBA1	1	0.1	1.3	13.4	1.3	7.9
EGLN_HUMAN	Endoglin	ENG	1	1	0.8	0.6	0.8	0.7
CAPG_HUMAN	Macrophage-capping protein	CAPG	1	0	0.7	62.9	0.6	100
RL40_HUMAN	Ubiquitin-60S ribosomal protein L40	UBA52	1	1	0.8	1.1	1.5	1.3
1C07_HUMAN	HLA class I histocompatibility antigen, Cw-7 alpha chain	HLA-C	0	0	0	0	0	0
PODXL_HUMAN	Podocalyxin	PODXL	1	1	0.7	1.9	1.2	1.5
MTPN_HUMAN	Myotrophin	MTPN	1	1	0.6	0.9	0.6	0.8
1A11_HUMAN	HLA class I histocompatibility antigen, A-11 alpha chain	HLA-A	0	0	0	0	0	0
AATC_HUMAN	Aspartate aminotransferase, cytoplasmic	GOT1	0	0	0	0	0	0
RBM39_HUMAN	RNA-binding protein 39	RBM39	0	0	0	0	0	0
1433B_HUMAN	14-3-3 protein beta/alpha	YWHAB	0	0	0	0	0	0
ANAG_HUMAN	Alpha-N-acetylglucosaminidase	NAGLU	1	1	0.7	0.8	0.9	0.7
GDIR2_HUMAN	Rho GDP-dissociation inhibitor 2	ARHGDIB	1	1	1	0.7	1.2	1.1
BST1_HUMAN	ADP-ribosyl cyclase 2	BST1	1	0	0.5	100	0.5	100
PEBP1_HUMAN	Phosphatidylethanolamine-binding protein 1	PEBP1	1	1	1.9	1.6	1.7	1.5
PPIB_HUMAN	Peptidyl-prolyl cis-trans isomerase B	PPIB	1	1	0.8	1.2	0.7	1.1
K2C1_HUMAN	Keratin, type II cytoskeletal 1	KRT1	1	1	1	0.8	1.2	1
FUCO2_HUMAN	Plasma alpha-L-fucosidase	FUCA2	0	1.1	0	1.2	0	1.2
ICAM3_HUMAN	Intercellular adhesion molecule 3	ICAM3	1	0	0.5	91.1	0.5	100
COL11_HUMAN	Collectin-11	COLEC11	0.9	0.9	0.7	0.7	0.7	0.6
TARSH_HUMAN	Target of Nesh-SH3	ABI3BP	0.9	0.9	0.6	0.6	0.9	0.9
KAD1_HUMAN	Adenylate kinase isoenzyme 1	AK1	1	0.8	0.6	8.5	0.6	8.7
6PGD_HUMAN	6-phosphogluconate dehydrogenase, decarboxylating	PGD	1.1	1	2.8	1.4	1.9	1.3
ALDOC_HUMAN	Fructose-bisphosphate aldolase C	ALDOC	1	1	0.9	1.1	0.8	1.3
FGL2_HUMAN	Fibroleukin	FGL2	1	1	0.5	0.8	0.8	1.7
CSDE1_HUMAN	Cold shock domain-containing protein E1	CSDE1	1	0	0.9	0	1.7	0
CDHR2_HUMAN	Cadherin-related family member 2	CDHR2	0	1	0	0.8	0	1.1
ARHGB_HUMAN	Rho guanine nucleotide exchange factor 11	ARHGEF11	0	0	0	0	0	0
MMRN1_HUMAN	Multimerin-1	MMRN1	0	1	0	1.5	0	1.9
EPHA4_HUMAN	Ephrin type-A receptor 4	EPHA4	0	1	0	1.4	0	1.4
CA2D1_HUMAN	Voltage-dependent calcium channel subunit alpha-2/delta-1	CACNA2D1	0	1	0	0.6	0	1.2
FBX39_HUMAN	F-box only protein 39	FBXO39	0	0	0	0	0	0
LCAT_HUMAN	Phosphatidylcholine-sterol acyltransferase	LCAT	1	1	1.1	0.9	1.3	0.9
1B07_HUMAN (+1)	HLA class I histocompatibility antigen, B-7 alpha chain	HLA-B	1	1	1.2	1	1.2	1.3
CNTN1_HUMAN	Contactin-1	CNTN1	1	1	0.5	0.9	0.7	0.8
TGON2_HUMAN	Trans-Golgi network integral membrane protein 2	TGOLN2	1	0	0	0	1.9	0
ENOG_HUMAN	Gamma-enolase	ENO2	0	0	0	0	0	0
MTG2_HUMAN	Mitochondrial ribosome-associated GTPase 2	MTG2	1	1	0.9	1.1	1.4	1.5
BABA1_HUMAN	BRISC and BRCA1-A complex member 1	BABAM1	0	1	29.4	0	0	0
CSTN1_HUMAN	Calsyntenin-1	CLSTN1	1	1	0.6	0	1.1	0.6
IGF2_HUMAN	Insulin-like growth factor II	IGF2	1	1	0.7	1.2	0.9	1.3
AMPD2_HUMAN	AMP deaminase 2	AMPD2	0	0	0	0	0	0
PGCA_HUMAN	Aggrecan core protein	ACAN	1	1	0	0.7	1.5	0
FA49B_HUMAN	Protein FAM49B	FAM49B	0	0	0	0	0	0
LAMP1_HUMAN	Lysosome-associated membrane glycoprotein 1	LAMP1	1	1	0.5	0.8	0.8	1.4
ICOSL_HUMAN	ICOS ligand	ICOSLG	1	1	0.6	0.6	0.9	0.8
NHRF1_HUMAN	Na(+)/H(+) exchange regulatory cofactor NHE-RF1	SLC9A3R1	0	1	100	1	100	0
ROBO4_HUMAN	Roundabout homolog 4	ROBO4	1	0	1.2	0	1.4	0
KPYM_HUMAN	Pyruvate kinase PKM	PKM	1	0	0.8	0	0.7	0
B3GN1_HUMAN	N-acetyllactosaminide beta-1,3-N-acetylglucosaminyltransferase	B3GNT1	1	0	1.3	0	1.7	0
PTPRC_HUMAN	Receptor-type tyrosine-protein phosphatase C	PTPRC	0	1	0	0.8	0	0.9
IASPP_HUMAN	RelA-associated inhibitor	PPP1R13L	0	1	0	0	0	1.2
MMP8_HUMAN	Neutrophil collagenase	MMP8	0	1	0	1.7	0	5.6
G6PE_HUMAN	GDH/6PGL endoplasmic bifunctional protein	H6PD	1	1	1.3	1.2	1.3	1.1
SAA2_HUMAN	Serum amyloid A-2 protein	SAA2	1	1	1.1	0.9	1.9	1.2
TTHY_HUMAN	Transthyretin	TTR	1	1	0.3	0.4	0.4	0.6
PARK7_HUMAN	Protein DJ-1	PARK7	1	1	1	1.4	1.4	1.8
SRGN_HUMAN	Serglycin	SRGN	1	1	0.7	0.6	0.8	0.9
ILF3_HUMAN	Interleukin enhancer-binding factor 3	ILF3	1	0	1.3	100	0	100
S38AA_HUMAN	Putative sodium-coupled neutral amino acid transporter 10	SLC38A10	1	1.1	1.2	5.3	1.2	7.2
LSAMP_HUMAN	Limbic system-associated membrane protein	LSAMP	0	0	0	0	0	0
GGCT_HUMAN	Gamma-glutamylcyclotransferase	GGCT	0.2	0.7	12.7	6.5	13.3	10.8
MENT_HUMAN	Protein MENT	MENT	1	1.5	0.7	12.2	1	18.7
RB11A_HUMAN (+1)	Ras-related protein Rab-11A	RAB11A	1	1	1	1.1	0.7	2.4
LYVE1_HUMAN	Lymphatic vessel endothelial hyaluronic acid receptor 1	LYVE1	1	1	0.7	0.7	0.8	0.8
DMP4_HUMAN	Extracellular serine/threonine protein kinase FAM20C	FAM20C	0	1	0	0.9	0	1
ACTBL_HUMAN	Beta-actin-like protein 2	ACTBL2	1	0	0.7	0	1	0
MA2A1_HUMAN	Alpha-mannosidase 2	MAN2A1	0	1	0	1.8	0	0
HNRPR_HUMAN	Heterogeneous nuclear ribonucleoprotein R	HNRNPR	0	0	0	0	0	0
ACE_HUMAN	Angiotensin-converting enzyme	ACE	1	0	1.1	0	0.9	0
LAMC1_HUMAN	Laminin subunit gamma-1	LAMC1	1	0	0.6	0	0.6	0
AKA12_HUMAN	A-kinase anchor protein 12	AKAP12	0	0	0	0	0	0
KDIS_HUMAN	Kinase D-interacting substrate of 220 kDa	KIDINS220	1	0	0	0	1	0
CNN2_HUMAN	Calponin-2	CNN2	1	1	1.6	1	1.7	1.4
PSB1_HUMAN	Proteasome subunit beta type-1	PSMB1	1	1	1.1	1	0.5	0.7
OAF_HUMAN	Out at first protein homolog	OAF	1	1	0.8	1.5	0.6	1.9
TSP4_HUMAN	Thrombospondin-4	THBS4	1	1	0.6	0.4	0.6	0.3
CMGA_HUMAN	Chromogranin-A	CHGA	1	0	0	0	0.9	0
PVRL1_HUMAN	Poliovirus receptor-related protein 1	PVRL1	1	1	0.8	0.6	1.3	0.9
PSA1_HUMAN	Proteasome subunit alpha type-1	PSMA1	1	1	2.1	2.7	1.3	1.3
ENDD1_HUMAN	Endonuclease domain-containing 1 protein	ENDOD1	0	1	0	0	0	1.2
RINI_HUMAN	Ribonuclease inhibitor	RNH1	1	1	1.1	0.4	1	0.5
1433T_HUMAN	14-3-3 protein theta	YWHAQ	0.9	0	2.9	0	2.9	0
RAB7A_HUMAN	Ras-related protein Rab-7a	RAB7A	1	0	0.7	0	1.2	0
FAT4_HUMAN	Protocadherin Fat 4	FAT4	0	0	0	0	0	0
NPM_HUMAN	Nucleophosmin	NPM1	0	1	0	1.3	0	1.5
PIGO_HUMAN	GPI ethanolamine phosphate transferase 3	PIGO	0	1	0	1.1	0	3.6
DAG1_HUMAN	Dystroglycan	DAG1	1	0	0.6	0	1.2	0
PSA7_HUMAN	Proteasome subunit alpha type-7	PSMA7	0	0.1	0	15.5	0	11.9
DPP4_HUMAN	Dipeptidyl peptidase 4	DPP4	0	0.9	0	0.9	0	0.8
TSP2_HUMAN	Thrombospondin-2	THBS2	0	1	0	0.8	0	0.8
MICLK_HUMAN	MICAL C-terminal-like protein	MICALCL	0	1	0	0.8	0	1.1
TBA4A_HUMAN	Tubulin alpha-4A chain	TUBA4A	0	1	0	0.8	0	2
TCP4_HUMAN	Activated RNA polymerase II transcriptional coactivator p15	SUB1	0	0	0	0	0	0
PSB4_HUMAN	Proteasome subunit beta type-4	PSMB4	0	0	0	0	0	0
ETHE1_HUMAN	Persulfide dioxygenase ETHE1, mitochondrial	ETHE1	1	0	42.7	0	60.3	0
SET_HUMAN	Protein SET	SET	0	0	0	0	0	0
SH3L1_HUMAN	SH3 domain-binding glutamic acid-rich-like protein	SH3BGRL	1	1	1.7	1.8	2.3	1.9
TN13B_HUMAN	Tumor necrosis factor ligand superfamily member 13B	TNFSF13B	1	1	2.7	0.5	3	1.9
ASC_HUMAN	Apoptosis-associated speck-like protein containing a CARD	PYCARD	0	0	0	0	0	0
MYLK_HUMAN	Myosin light chain kinase, smooth muscle	MYLK	1	0	0.7	100	1.3	100
OSTP_HUMAN	Osteopontin	SPP1	1	1	1.8	0.9	1.5	0.4
IGF1_HUMAN	Insulin-like growth factor I	IGF1	1	1	0.9	0.9	1.1	0.9
TCTP_HUMAN	Translationally-controlled tumor protein	TPT1	1	1	0.7	1.3	0.9	2.3
ML12A_HUMAN (+1)	Myosin regulatory light chain 12A	MYL12A	0	1	73.6	0.7	0	1.4
FKB1A_HUMAN	Peptidyl-prolyl cis-trans isomerase FKBP1A	FKBP1A	1	1	1.5	1.4	1.5	1.4
TIMP1_HUMAN	Metalloproteinase inhibitor 1	TIMP1	1	1	1	0.6	1	0.7
NOTC1_HUMAN	Neurogenic locus notch homolog protein 1	NOTCH1	1	0	1.1	0	1	0
TPM2_HUMAN	Tropomyosin beta chain	TPM2	0	1	0	0	0	0.9
FUCO_HUMAN	Tissue alpha-L-fucosidase	FUCA1	1	1	0.4	0.9	0.9	1.2
IBP6_HUMAN	Insulin-like growth factor-binding protein 6	IGFBP6	0.8	0.7	1	1	1.3	1
EP15R_HUMAN	Epidermal growth factor receptor substrate 15-like 1	EPS15L1	0	0	0	0	0	0
PLXA2_HUMAN	Plexin-A2	PLXNA2	0	0	0	0	0	0
CSRP1_HUMAN	Cysteine and glycine-rich protein 1	CSRP1	1	0	0.8	0	1.6	0
PDLI1_HUMAN	PDZ and LIM domain protein 1	PDLIM1	0	1	0	0.8	0	1.5
PSA5_HUMAN	Proteasome subunit alpha type-5	PSMA5	0	1	0	0.9	0	0
RSBNL_HUMAN	Round spermatid basic protein 1-like protein	RSBN1L	0	0	0	0	0	0
A1AG1_HUMAN	Alpha-1-acid glycoprotein 1	ORM1	1	0	0.4	0	0.6	0
LMAN2_HUMAN	Vesicular integral-membrane protein VIP36	LMAN2	0	1	0	0	0	0
DPB1_HUMAN	HLA class II histocompatibility antigen, DP beta 1 chain	HLA-DPB1	1	0	0.9	0	0	0
SF3B2_HUMAN	Splicing factor 3B subunit 2	SF3B2	0	1	0	0.8	0	0
IF122_HUMAN	Intraflagellar transport protein 122 homolog	IFT122	1	0	1.6	0	1.5	0
PSA4_HUMAN	Proteasome subunit alpha type-4	PSMA4	0	0	0	0	0	0
RB15B_HUMAN	Putative RNA-binding protein 15B	RBM15B	0	0	0	0	0	0
GLPK2_HUMAN	Glycerol kinase 2	GK2	0	0	0	0	0	0
VAC14_HUMAN	Protein VAC14 homolog	VAC14	1	0	0	0	1.2	0
CR3L3_HUMAN	Cyclic AMP-responsive element-binding protein 3-like protein 3	CREB3L3	0	1	100	1.8	100	1.1
RD23B_HUMAN	UV excision repair protein RAD23 homolog B	RAD23B	1	1	1.6	1.1	1	1.2
SNX3_HUMAN	Sorting nexin-3	SNX3	0	0	0	0	0	0
IGJ_HUMAN	Immunoglobulin J chain	IGJ	1	0	0.6	22.1	0.8	47.4
IGKC_HUMAN	Ig kappa chain C region	IGKC	1	1	0.7	1.2	1.7	2.8
KCY_HUMAN	UMP-CMP kinase	CMPK1	0	1	0	0.7	0	1
GAPR1_HUMAN	Golgi-associated plant pathogenesis-related protein 1	GLIPR2	1	0	0.9	0	0.7	0
SBP1_HUMAN	Selenium-binding protein 1	SELENBP1	0	1	0	0	0	0
CP46A_HUMAN	Cholesterol 24-hydroxylase	CYP46A1	0	1	0	1	0	0.7
GLO2_HUMAN	Hydroxyacylglutathione hydrolase, mitochondrial	HAGH	0	1	0	1.2	0	1.2
CQ105_HUMAN	Uncharacterized protein C17orf105	C17orf105	0	0	0	0	0	0
PIGR_HUMAN	Polymeric immunoglobulin receptor	PIGR	0.2	0	5.6	0	0	0
CLIC1_HUMAN	Chloride intracellular channel protein 1	CLIC1	1	0	2.6	0	3.2	0
CD109_HUMAN	CD109 antigen	CD109	1	0	2.3	0	3.7	0
TBB8L_HUMAN	Tubulin beta-8 chain-like protein LOC260334		0	1	0	1.8	0	1.6
DPEP2_HUMAN	Dipeptidase 2	DPEP2	0	1	0	0.4	0	1
B3GN2_HUMAN	UDP-GlcNAc:betaGal beta-1,3-N-acetylglucosaminyltransferase 2	B3GNT2	1	0	0.9	0	0.8	0
PYGL_HUMAN	Glycogen phosphorylase, liver form	PYGL	0	0	0	0	0	0
LEUK_HUMAN	Leukosialin	SPN	0	0	0	0	0	0
CNPY2_HUMAN	Protein canopy homolog 2	CNPY2	0	0	0	0	0	0
ATF6B_HUMAN	Cyclic AMP-dependent transcription factor ATF-6 beta	ATF6B	1	0	0.5	0	0.9	0
CO1A2_HUMAN	Collagen alpha-2(I) chain	COL1A2	0	1	0	0.9	0	1.6
PCD18_HUMAN	Protocadherin-18	PCDH18	1	0	0.6	0	1	0
GOLI4_HUMAN	Golgi integral membrane protein 4	GOLIM4	0	1	0	1.2	0	1.1
K0947_HUMAN	Uncharacterized protein KIAA0947	KIAA0947	0	0	0	0	0	0
TULP4_HUMAN	Tubby-related protein 4	TULP4	0	0	0	0	0	0
IBP4_HUMAN	Insulin-like growth factor-binding protein 4	IGFBP4	1	1	0.9	0.5	1.4	0.5
APEX1_HUMAN	DNA-(apurinic or apyrimidinic site) lyase	APEX1	0	0	0	0	0	0
CUTA_HUMAN	Protein CutA	CUTA	1	1	1.5	0.6	0.7	0.5
ABRAL_HUMAN	Costars family protein ABRACL	ABRACL	1	0	0.8	100	0.7	0
G3BP1_HUMAN	Ras GTPase-activating protein-binding protein 1	G3BP1	0	0	0	0	0	0
LEG1_HUMAN	Galectin-1	LGALS1	1	1	0.8	0.6	0.6	0.3
AN32A_HUMAN	Acidic leucine-rich nuclear phosphoprotein 32 family member A	ANP32A	0	0	0	0	0	0
MMP2_HUMAN	72 kDa type IV collagenase	MMP2	1	0	0.8	0	0.9	0
CD5L_HUMAN	CD5 antigen-like	CD5L	1	0	1.3	0	1.4	0
PLEK_HUMAN	Pleckstrin	PLEK	1	0	0.8	0	1.2	0
ACBP_HUMAN	Acyl-CoA-binding protein	DBI	0	0	0	0	0	0
TIE1_HUMAN	Tyrosine-protein kinase receptor Tie-1	TIE1	0	1	0	1.5	0	1.9
GRN_HUMAN	Granulins	GRN	1	0	1.5	0	1.6	0
CH3L1_HUMAN	Chitinase-3-like protein 1	CHI3L1	1	0	1.2	0	1.4	0
UFO_HUMAN	Tyrosine-protein kinase receptor UFO	AXL	0	1	0	0.7	0	1
OIT3_HUMAN	Oncoprotein-induced transcript 3 protein	OIT3	0	1	0	0.7	0	0.8
CALU_HUMAN	Calumenin	CALU	1	0	1	0	0.9	0
FSCN1_HUMAN	Fascin	FSCN1	1	0	0	0	0	0
DJC21_HUMAN	DnaJ homolog subfamily C member 21	DNAJC21	0	0	0	0	0	0
SNED1_HUMAN	Sushi, nidogen and EGF-like domain-containing protein 1	SNED1	1	0	0.8	0	1.5	0
PSB8_HUMAN	Proteasome subunit beta type-8	PSMB8	1	0	1.1	0	1.7	0
APMAP_HUMAN	Adipocyte plasma membrane-associated protein	APMAP	0	1	0	1.9	0	3
PDIA3_HUMAN	Protein disulfide-isomerase A3	PDIA3	0	0	0	0	0	0
HMGN2_HUMAN	Non-histone chromosomal protein HMG-17	HMGN2	0	0	0	0	0	0
CAMP_HUMAN	Cathelicidin antimicrobial peptide	CAMP	1	0	1.9	0	2.2	0
SYTL4_HUMAN	Synaptotagmin-like protein 4	SYTL4	0	0	0	0	0	0
SRP54_HUMAN	Signal recognition particle 54 kDa protein	SRP54	1	0	0.5	0	0	0
NEXN_HUMAN	Nexilin	NEXN	1	0	1.1	0	1	0
A1AT_HUMAN	Alpha-1-antitrypsin	SERPINA1	1	0	1.3	0	1.4	0
RAB14_HUMAN	Ras-related protein Rab-14	RAB14	1	1	1	1.1	1	1.3
LIRA3_HUMAN	Leukocyte immunoglobulin-like receptor subfamily A member 3	LILRA3	1	1	1.4	1.2	2	0.9
CADH2_HUMAN	Cadherin-2	CDH2	0	1	0	0.4	0	1.6
EPCR_HUMAN	Endothelial protein C receptor	PROCR	0	1	0	1	0	1.5
MIF_HUMAN	Macrophage migration inhibitory factor	MIF	1	0	1	0	0.4	0
CYTB_HUMAN	Cystatin-B	CSTB	0	1	0	1.2	0	0
CD97_HUMAN	CD97 antigen	CD97	0	0	0	0	0	0
KLD10_HUMAN	Kelch domain-containing protein 10	KLHDC10	1	0	0.7	0	1.3	0
H15_HUMAN	Histone H1.5	HIST1H1B	0	1	0	1.1	0	1.8
AMY1_HUMAN (+2)	Alpha-amylase 1	AMY1A	0	1	0	1.1	0	1
DEN5B_HUMAN	DENN domain-containing protein 5B	DENND5B	0	0	0	0	0	0
RNAS2_HUMAN	Non-secretory ribonuclease	RNASE2	1	0	0.8	0	0.9	0
GSH1_HUMAN	Glutamate--cysteine ligase catalytic subunit	GCLC	1	0	0.7	0	1.3	0
HNRH2_HUMAN	Heterogeneous nuclear ribonucleoprotein H2	HNRNPH2	1	0	0.6	0	0.6	0
PSA6_HUMAN	Proteasome subunit alpha type-6	PSMA6	0	1	0	0.9	0	1.6
BFSP1_HUMAN	Filensin	BFSP1	1	0	0.8	0	1.3	0
GSHR_HUMAN	Glutathione reductase, mitochondrial	GSR	0	1	0	1.6	0	2.8
PTMA_HUMAN	Prothymosin alpha	PTMA	1	0	0.9	0	0	0
QSOX2_HUMAN	Sulfhydryl oxidase 2	QSOX2	1	0	0.7	0	1.3	0
I11RA_HUMAN	Interleukin-11 receptor subunit alpha	IL11RA	1	0	0.3	0	1.9	0
TRPV6_HUMAN	Transient receptor potential cation channel subfamily V member 6	TRPV6	1	0	1	0	1	0
FHR3_HUMAN	Complement factor H-related protein 3	CFHR3	0	1	0	2.1	0	2.8
LYAM3_HUMAN	P-selectin	SELP	0	1	0	0.6	0	0.9
GMFG_HUMAN	Glia maturation factor gamma	GMFG	1	0	0.4	0	0.8	0
MGAT1_HUMAN	Alpha-1,3-mannosyl-glycoprotein 2-beta-N-acetylglucosaminyltransferase	MGAT1	0	0	0	0	0	0
ANGL3_HUMAN	Angiopoietin-related protein 3	ANGPTL3	0	1	0	0.9	0	0.7
IBP7_HUMAN	Insulin-like growth factor-binding protein 7	IGFBP7	1	0	1.2	0	0	0
PON3_HUMAN	Serum paraoxonase/lactonase 3	PON3	1	0	0.8	0	1.8	0
RANG_HUMAN	Ran-specific GTPase-activating protein	RANBP1	0	1	0	0.9	0	0.8
TFPI1_HUMAN	Tissue factor pathway inhibitor	TFPI	1	0	1.1	0	0.8	0
FRIL_HUMAN	Ferritin light chain	FTL	0	0	0	0	0	0
ATL2_HUMAN	ADAMTS-like protein 2	ADAMTSL2	1	0	1	0	0	0
ASGR2_HUMAN	Asialoglycoprotein receptor 2	ASGR2	1	0	1	0	1.6	0
DUT_HUMAN	Deoxyuridine 5'-triphosphate nucleotidohydrolase, mitochondrial	DUT	1	0	0	0	0	0
CR2_HUMAN	Complement receptor type 2	CR2	1	0	0.6	0	0.4	0
FA7_HUMAN	Coagulation factor VII	F7	0	1	0	0.4	0	1

## Sheet: 1 vs 2
Accession Number	ProteinName	GeneName	A1	B1	A2	B2	A3	B3	Pearson Coefficient	PC-pValue	Kendall Coefficient	KC-pValue	Spearman Coefficient	SC-pValue	T-test p Value	T-test Hypothesis	-Log(p value)	Anova p	SAM	Average Diff	Average Ratio	Log2(Average Ratio)	SNR
APOB_HUMAN	Apolipoprotein B-100	APOB	1.1	0.9	1.1	1	1.4	1.2	-0.301511	0.698489	-0.223607	1	-0.235702	1	0.698489	0	0.155841	0.698489	0.447214	0.05	1.05	0.0703893	0.333333
CO4B_HUMAN	Complement C4-B	C4B	0.9	1	1	0.9	1	1	0	1	0	1	0	1	1	0	0	1	0	0	1	0	0
CERU_HUMAN	Ceruloplasmin	CP	0.9	0.9	1.2	1	0.9	0.8	-0.816497	0.183503	-0.894427	0.333333	-0.942809	0.333333	0.183503	0	0.736356	0.183503	2	0.2	1.22222	0.289507	2
AACT_HUMAN	Alpha-1-antichymotrypsin	SERPINA3	1	1	1.8	1.4	1.5	1.4	-0.904534	0.095466	-0.894427	0.333333	-0.942809	0.333333	0.095466	0	1.02015	0.095466	3	0.6	1.6	0.678072	3
CFAH_HUMAN	Complement factor H	CFH	0.9	0.9	0.9	1	1	0.9	-0.57735	0.42265	-0.57735	1	-0.57735	1	0.42265	0	0.374019	0.42265	1	0.05	1.05556	0.0780025	1
ITIH4_HUMAN	Inter-alpha-trypsin inhibitor heavy chain H4	ITIH4	0.8	1.1	1.4	2	1.8	2	-0.845154	0.154846	-0.816497	0.333333	-0.894427	0.333333	0.154846	0	0.810101	0.154846	2.23607	0.75	1.78947	0.839535	1.66667
HEMO_HUMAN	Hemopexin	HPX	1.1	1	1.1	1	1.3	1	0	1	0	1	0	1	1	0	0	1	0	0	1	0	0
ITIH1_HUMAN	Inter-alpha-trypsin inhibitor heavy chain H1	ITIH1	0.8	1	0.9	0.9	0.8	0.8	0	1	0	1	0	1	1	0	0	1	0	0	1	0	0
VTDB_HUMAN	Vitamin D-binding protein	GC	0.9	0.9	0.9	0.8	0.8	0.7	0.57735	0.42265	0.57735	1	0.57735	1	0.42265	0	0.374019	0.42265	-1	-0.05	0.944444	-0.0824622	-1
CFAB_HUMAN	Complement factor B	CFB	0.9	0.9	1.1	1.1	1.3	1.1	-1	0	-1	0.333333	-1	0.333333	0	1	65535	0	65535	0.2	1.22222	0.289507	65535
ITIH2_HUMAN	Inter-alpha-trypsin inhibitor heavy chain H2	ITIH2	0.9	0.9	0.9	0.8	0.8	0.8	0.57735	0.42265	0.57735	1	0.57735	1	0.42265	0	0.374019	0.42265	-1	-0.05	0.944444	-0.0824622	-1
ANT3_HUMAN	Antithrombin-III	SERPINC1	0.9	0.8	0.8	0.6	0.7	0.5	0.688247	0.311753	0.67082	0.666667	0.707107	0.666667	0.311753	0	0.50619	0.311753	-1.34164	-0.15	0.823529	-0.280108	-1
FETUA_HUMAN	Alpha-2-HS-glycoprotein	AHSG	1.1	0.8	0.7	0.6	0.5	0.4	0.801784	0.198216	0.816497	0.333333	0.894427	0.333333	0.198216	0	0.702861	0.198216	-1.89737	-0.3	0.684211	-0.547488	-1.5
KNG1_HUMAN	Kininogen-1	KNG1	0.9	1.1	0.9	1	0.9	1	0.301511	0.698489	0.223607	1	0.235702	1	0.698489	0	0.155841	0.698489	-0.447214	-0.05	0.95	-0.0740006	-0.333333
A1BG_HUMAN	Alpha-1B-glycoprotein	A1BG	1.1	1.1	1.2	1.1	1.3	1.3	-0.57735	0.42265	-0.57735	1	-0.57735	1	0.42265	0	0.374019	0.42265	1	0.05	1.04545	0.0641303	1
CO3_HUMAN	Complement C3	C3	1	0.9	2.2	2.2	1.9	1.9	-0.998404	0.00159617	-0.894427	0.333333	-0.942809	0.333333	0.00159617	1	2.79692	0.00159617	25	1.25	2.31579	1.2115	25
FINC_HUMAN	Fibronectin	FN1	0.6	0.6	1.7	2.5	1.4	1.8	-0.935674	0.0643257	-0.894427	0.333333	-0.942809	0.333333	0.0643257	0	1.19162	0.0643257	3.75	1.5	3.5	1.80735	3.75
APOA4_HUMAN	Apolipoprotein A-IV	APOA4	1.1	1.1	0.6	0.6	0.6	0.6	1	0	1	0.333333	1	0.333333	0	1	65535	0	65535	-0.5	0.545455	-0.874469	65535
APOH_HUMAN	Beta-2-glycoprotein 1	APOH	0.9	1	0.9	0.8	1.1	1	0.707107	0.292893	0.67082	0.666667	0.707107	0.666667	0.292893	0	0.533291	0.292893	-1.41421	-0.1	0.894737	-0.160465	-1
PLMN_HUMAN	Plasminogen	PLG	0.9	0.9	0.8	0.9	1	1	0.57735	0.42265	0.57735	1	0.57735	1	0.42265	0	0.374019	0.42265	-1	-0.05	0.944444	-0.0824622	-1
ZA2G_HUMAN	Zinc-alpha-2-glycoprotein	AZGP1	1.1	1.1	1.3	1.2	1.8	1.8	-0.904534	0.095466	-0.894427	0.333333	-0.942809	0.333333	0.095466	0	1.02015	0.095466	3	0.15	1.13636	0.184425	3
THRB_HUMAN	Prothrombin	F2	0.9	0.9	0.7	0.7	1	0.8	1	0	1	0.333333	1	0.333333	0	1	65535	0	65535	-0.2	0.777778	-0.36257	65535
ITIH3_HUMAN	Inter-alpha-trypsin inhibitor heavy chain H3	ITIH3	0.9	0.9	1.3	1.2	1.1	1.1	-0.980196	0.0198039	-0.894427	0.333333	-0.942809	0.333333	0.0198039	0	1.70325	0.0198039	7	0.35	1.38889	0.473931	7
VTNC_HUMAN	Vitronectin	VTN	0.9	0.9	1	1	1.1	0.9	-1	0	-1	0.333333	-1	0.333333	0	1	65535	0	65535	0.1	1.11111	0.152003	65535
CLUS_HUMAN	Clusterin	CLU	1	0.9	1	1	1	0.9	-0.57735	0.42265	-0.57735	1	-0.57735	1	0.42265	0	0.374019	0.42265	1	0.05	1.05263	0.0740006	1
CFAI_HUMAN	Complement factor I	CFI	0.9	0.8	1	0.9	1.1	0.9	-0.707107	0.292893	-0.67082	0.666667	-0.707107	0.666667	0.292893	0	0.533291	0.292893	1.41421	0.1	1.11765	0.160465	1
CO5_HUMAN	Complement C5	C5	1	1	1.1	1	1.2	1.1	-0.57735	0.42265	-0.57735	1	-0.57735	1	0.42265	0	0.374019	0.42265	1	0.05	1.05	0.0703893	1
C1S_HUMAN	Complement C1s subcomponent	C1S	0.8	0.7	0.9	0.9	0.8	0.9	-0.904534	0.095466	-0.894427	0.333333	-0.942809	0.333333	0.095466	0	1.02015	0.095466	3	0.15	1.2	0.263034	3
ANGT_HUMAN	Angiotensinogen	AGT	0.9	0.9	0.9	0.9	1.2	1.2												0	1	0
APOE_HUMAN	Apolipoprotein E	APOE	0.8	0.9	0.8	0.9	1	1.2	0	1	0	1	0	1	1	0	0	1	0	0	1	0	0
CO9_HUMAN	Complement component C9	C9	0.9	1.1	1.7	1.8	1.4	1.5	-0.978492	0.0215079	-0.816497	0.333333	-0.894427	0.333333	0.0215079	0	1.6674	0.0215079	6.7082	0.75	1.75	0.807355	5
CO7_HUMAN	Complement component C7	C7	0.9	0.9	0.7	0.8	1.1	1	0.904534	0.095466	0.894427	0.333333	0.942809	0.333333	0.095466	0	1.02015	0.095466	-3	-0.15	0.833333	-0.263034	-3
AFAM_HUMAN	Afamin	AFM	1	1	0.7	0.9	0.9	0.9	0.816497	0.183503	0.894427	0.333333	0.942809	0.333333	0.183503	0	0.736356	0.183503	-2	-0.2	0.8	-0.321928	-2
HRG_HUMAN	Histidine-rich glycoprotein	HRG	0.9	0.9	1.1	1.3	0.7	0.6	-0.904534	0.095466	-0.894427	0.333333	-0.942809	0.333333	0.095466	0	1.02015	0.095466	3	0.3	1.33333	0.415037	3
AMBP_HUMAN	Protein AMBP	AMBP	1	1	1.1	1.1	1.4	1.3	-1	0	-1	0.333333	-1	0.333333	0	1	65535	0	65535	0.1	1.1	0.137504	65535
LUM_HUMAN	Lumican	LUM	0.9	0.9	0.4	0.5	0.4	0.4	0.987878	0.0121217	0.894427	0.333333	0.942809	0.333333	0.0121217	0	1.91644	0.0121217	-9	-0.45	0.5	-1	-9
C1R_HUMAN	Complement C1r subcomponent	C1R	0.8	0.9	0.9	0.9	0.9	1	-0.57735	0.42265	-0.57735	1	-0.57735	1	0.42265	0	0.374019	0.42265	1	0.05	1.05882	0.0824622	1
RET4_HUMAN	Retinol-binding protein 4	RBP4	1.1	0.9	0.8	0.7	0.9	0.8	0.845154	0.154846	0.816497	0.333333	0.894427	0.333333	0.154846	0	0.810101	0.154846	-2.23607	-0.25	0.75	-0.415037	-1.66667
CO6_HUMAN	Complement component C6	C6	0.9	0.9	0.8	0.8	0.9	0.8	1	0	1	0.333333	1	0.333333	0	1	65535	0	65535	-0.1	0.888889	-0.169925	65535
CXCL7_HUMAN	Platelet basic protein	PPBP	1.1	1.1	0.8	0.8	0.8	1.1	1	0	1	0.333333	1	0.333333	0	1	65535	0	65535	-0.3	0.727273	-0.459432	65535
GELS_HUMAN	Gelsolin	GSN	0.8	1	0.6	0.5	0.5	0.5	0.911322	0.0886776	0.816497	0.333333	0.894427	0.333333	0.0886776	0	1.05219	0.0886776	-3.1305	-0.35	0.611111	-0.710493	-2.33333
A2GL_HUMAN	Leucine-rich alpha-2-glycoprotein	LRG1	1.1	0.9	1.4	1.6	1.9	2.1	-0.928477	0.0715233	-0.816497	0.333333	-0.894427	0.333333	0.0715233	0	1.14555	0.0715233	3.53553	0.5	1.5	0.584963	2.5
CPN2_HUMAN	Carboxypeptidase N subunit 2	CPN2	0.8	0.9	0.9	1.1	1.1	1.2	-0.688247	0.311753	-0.67082	0.666667	-0.707107	0.666667	0.311753	0	0.50619	0.311753	1.34164	0.15	1.17647	0.234465	1
CO8A_HUMAN	Complement component C8 alpha chain	C8A	1	1	1	1	1	1												0	1	0
PLSL_HUMAN	Plastin-2	LCP1	0.7	0.9	2.2	2	1.2	1.3	-0.988372	0.0116283	-0.816497	0.333333	-0.894427	0.333333	0.0116283	0	1.93448	0.0116283	9.19239	1.3	2.625	1.39232	6.5
CO8G_HUMAN	Complement component C8 gamma chain	C8G	0.7	0.7	1.2	0.9	1	0.7	-0.855186	0.144814	-0.894427	0.333333	-0.942809	0.333333	0.144814	0	0.83919	0.144814	2.33333	0.35	1.5	0.584963	2.33333
FIBA_HUMAN	Fibrinogen alpha chain	FGA	1	0.9	0.6	0.5	0.6	0.6	0.970143	0.0298575	0.816497	0.333333	0.894427	0.333333	0.0298575	0	1.52495	0.0298575	-5.65685	-0.4	0.578947	-0.788496	-4
CO2_HUMAN	Complement C2	C2	1	1.1	1.1	1.1	1.2	1.2	-0.57735	0.42265	-0.57735	1	-0.57735	1	0.42265	0	0.374019	0.42265	1	0.05	1.04762	0.0671142	1
CO8B_HUMAN	Complement component C8 beta chain	C8B	0.8	0.9	1.2	0.8	1.3	0.9	-0.457496	0.542504	-0.223607	1	-0.235702	1	0.542504	0	0.265597	0.542504	0.727607	0.15	1.17647	0.234465	0.6
APOA2_HUMAN	Apolipoprotein A-II	APOA2	0.8	0.9	2.7	3	3.5	3.7	-0.993808	0.00619201	-0.816497	0.333333	-0.894427	0.333333	0.00619201	1	2.20817	0.00619201	12.6491	2	3.35294	1.74543	10
IC1_HUMAN	Plasma protease C1 inhibitor	SERPING1	0.9	0.9	2	1.9	1.8	1.8	-0.99774	0.00225989	-0.894427	0.333333	-0.942809	0.333333	0.00225989	1	2.64591	0.00225989	21	1.05	2.16667	1.11548	21
VWF_HUMAN	von Willebrand factor	VWF	0.6	0.8	1.5	1.2	1.7	1.4	-0.930949	0.0690507	-0.816497	0.333333	-0.894427	0.333333	0.0690507	0	1.16083	0.0690507	3.60555	0.65	1.92857	0.947533	2.6
KAIN_HUMAN	Kallistatin	SERPINA4	0.9	0.9	0.6	0.8	0.9	1	0.816497	0.183503	0.894427	0.333333	0.942809	0.333333	0.183503	0	0.736356	0.183503	-2	-0.2	0.777778	-0.36257	-2
PEDF_HUMAN	Pigment epithelium-derived factor	SERPINF1	1	0.9	0.9	0.9	1	0.8	0.57735	0.42265	0.57735	1	0.57735	1	0.42265	0	0.374019	0.42265	-1	-0.05	0.947368	-0.0780025	-1
ACTG_HUMAN	Actin, cytoplasmic 2	ACTG1	0.9	1	1.2	1.2	1.2	1.2	-0.96225	0.0377496	-0.894427	0.333333	-0.942809	0.333333	0.0377496	0	1.42309	0.0377496	5	0.25	1.26316	0.337035	5
CRP_HUMAN	C-reactive protein	CRP	0	0	0	0	0	0												0
HEP2_HUMAN	Heparin cofactor 2	SERPIND1	1	1	1	1	0.8	0.8												0	1	0
A2AP_HUMAN	Alpha-2-antiplasmin	SERPINF2	1	1	0.8	0.7	0.9	0.9	0.96225	0.0377496	0.894427	0.333333	0.942809	0.333333	0.0377496	0	1.42309	0.0377496	-5	-0.25	0.75	-0.415037	-5
TETN_HUMAN	Tetranectin	CLEC3B	1	1.1	0.6	0.7	0.7	0.7	0.970143	0.0298575	0.816497	0.333333	0.894427	0.333333	0.0298575	0	1.52495	0.0298575	-5.65685	-0.4	0.619048	-0.691878	-4
PGRP2_HUMAN	N-acetylmuramoyl-L-alanine amidase	PGLYRP2	1	1	0.7	0.7	0.7	0.7	1	0	1	0.333333	1	0.333333	0	1	65535	0	65535	-0.3	0.7	-0.514573	65535
FA5_HUMAN	Coagulation factor V	F5	0.9	1.1	1	1.3	1.1	1.1	-0.507093	0.492907	-0.408248	0.666667	-0.447214	0.666667	0.492907	0	0.307235	0.492907	0.83205	0.15	1.15	0.201634	0.6
THBG_HUMAN	Thyroxine-binding globulin	SERPINA7	1	1	0.8	0.8	0.7	0.7	1	0	1	0.333333	1	0.333333	0	1	65535	0	65535	-0.2	0.8	-0.321928	65535
TSP1_HUMAN	Thrombospondin-1	THBS1	1	1	0.7	0.7	0.8	0.9	1	0	1	0.333333	1	0.333333	0	1	65535	0	65535	-0.3	0.7	-0.514573	65535
KLKB1_HUMAN	Plasma kallikrein	KLKB1	1	0.9	0.8	0.8	0.9	0.9	0.904534	0.095466	0.894427	0.333333	0.942809	0.333333	0.095466	0	1.02015	0.095466	-3	-0.15	0.842105	-0.247928	-3
ALBU_HUMAN	Serum albumin	ALB	1	0.9	0.7	0.8	1.1	1.2	0.894427	0.105573	0.816497	0.333333	0.894427	0.333333	0.105573	0	0.976448	0.105573	-2.82843	-0.2	0.789474	-0.341037	-2
ALS_HUMAN	Insulin-like growth factor-binding protein complex acid labile subunit	IGFALS	1	1.1	0.8	0.9	0.9	1	0.894427	0.105573	0.816497	0.333333	0.894427	0.333333	0.105573	0	0.976448	0.105573	-2.82843	-0.2	0.809524	-0.304855	-2
TPM4_HUMAN	Tropomyosin alpha-4 chain	TPM4	1.1	1.1	1.1	1	1.4	1.3	0.57735	0.42265	0.57735	1	0.57735	1	0.42265	0	0.374019	0.42265	-1	-0.05	0.954545	-0.0671142	-1
CBG_HUMAN	Corticosteroid-binding globulin	SERPINA6	1	1	1	1	1.1	1.1												0	1	0
C1QB_HUMAN	Complement C1q subcomponent subunit B	C1QB	1.1	1.2	0.9	1.1	1.1	1.3	0.688247	0.311753	0.67082	0.666667	0.707107	0.666667	0.311753	0	0.50619	0.311753	-1.34164	-0.15	0.869565	-0.201634	-1
ECM1_HUMAN	Extracellular matrix protein 1	ECM1	1.1	1	0.9	0.8	1	0.8	0.894427	0.105573	0.816497	0.333333	0.894427	0.333333	0.105573	0	0.976448	0.105573	-2.82843	-0.2	0.809524	-0.304855	-2
MOES_HUMAN	Moesin	MSN	1	1	1.4	2.2	1.6	1.9	-0.816497	0.183503	-0.894427	0.333333	-0.942809	0.333333	0.183503	0	0.736356	0.183503	2	0.8	1.8	0.847997	2
APOL1_HUMAN	Apolipoprotein L1	APOL1	0.8	0.9	1.2	2.1	1.7	3.1	-0.78072	0.21928	-0.816497	0.333333	-0.894427	0.333333	0.21928	0	0.659001	0.21928	1.7669	0.8	1.94118	0.956931	1.6
PROS_HUMAN	Vitamin K-dependent protein S	PROS1	1	0.9	0.8	0.9	0.8	0.8	0.707107	0.292893	0.67082	0.666667	0.707107	0.666667	0.292893	0	0.533291	0.292893	-1.41421	-0.1	0.894737	-0.160465	-1
S10A9_HUMAN	Protein S100-A9	S100A9	0	0	0	0	0	0												0
VCAM1_HUMAN	Vascular cell adhesion protein 1	VCAM1	1.1	1	0.9	1	1.1	0.9	0.707107	0.292893	0.67082	0.666667	0.707107	0.666667	0.292893	0	0.533291	0.292893	-1.41421	-0.1	0.904762	-0.14439	-1
GPX3_HUMAN	Glutathione peroxidase 3	GPX3	1	1	0.9	0.8	1.1	1.1	0.904534	0.095466	0.894427	0.333333	0.942809	0.333333	0.095466	0	1.02015	0.095466	-3	-0.15	0.85	-0.234465	-3
SHBG_HUMAN	Sex hormone-binding globulin	SHBG	1	1	0.7	0.6	0.6	0.6	0.980196	0.0198039	0.894427	0.333333	0.942809	0.333333	0.0198039	0	1.70325	0.0198039	-7	-0.35	0.65	-0.621488	-7
CBPN_HUMAN	Carboxypeptidase N catalytic chain	CPN1	1.1	1.1	1	1.2	1	1.3	7.85046e-16	1	0	1	0	1	1	0	0	1	0	0	1	0	0
APOC3_HUMAN	Apolipoprotein C-III	APOC3	1.1	1	1.7	1.7	1.5	1.6	-0.994135	0.00586515	-0.894427	0.333333	-0.942809	0.333333	0.00586515	1	2.23172	0.00586515	13	0.65	1.61905	0.695145	13
PERM_HUMAN	Myeloperoxidase	MPO	0.9	0.8	1.5	1.8	2	2	-0.963087	0.0369132	-0.816497	0.333333	-0.894427	0.333333	0.0369132	0	1.43282	0.0369132	5.05964	0.8	1.94118	0.956931	4
CO6A3_HUMAN	Collagen alpha-3(VI) chain	COL6A3	1.1	1	0.9	0.8	1	0.9	0.894427	0.105573	0.816497	0.333333	0.894427	0.333333	0.105573	0	0.976448	0.105573	-2.82843	-0.2	0.809524	-0.304855	-2
TAGL2_HUMAN	Transgelin-2	TAGLN2	0.9	0.9	0.8	0.8	1.2	1	1	0	1	0.333333	1	0.333333	0	1	65535	0	65535	-0.1	0.888889	-0.169925	65535
C1QR1_HUMAN	Complement component C1q receptor	CD93	1	0	0.6	0	0.6	0	0.235702	0.764298	0.223607	1	0.235702	1	0.764298	0	0.116737	0.764298	-0.342997	-0.2	0.6	-0.736966	-0.25
F13B_HUMAN	Coagulation factor XIII B chain	F13B	0.9	1	0.8	0.8	1	1	0.904534	0.095466	0.894427	0.333333	0.942809	0.333333	0.095466	0	1.02015	0.095466	-3	-0.15	0.842105	-0.247928	-3
FA12_HUMAN	Coagulation factor XII	F12	1	1	0.6	0.5	0.8	0.8	0.987878	0.0121217	0.894427	0.333333	0.942809	0.333333	0.0121217	0	1.91644	0.0121217	-9	-0.45	0.55	-0.862496	-9
HGFA_HUMAN	Hepatocyte growth factor activator	HGFAC	1	1	0.9	0.8	0.9	0.8	0.904534	0.095466	0.894427	0.333333	0.942809	0.333333	0.095466	0	1.02015	0.095466	-3	-0.15	0.85	-0.234465	-3
PPIA_HUMAN	Peptidyl-prolyl cis-trans isomerase A	PPIA	1	1	1.3	1.3	1.6	1.5	-1	0	-1	0.333333	-1	0.333333	0	1	65535	0	65535	0.3	1.3	0.378512	65535
CADH5_HUMAN	Cadherin-5	CDH5	1	1	0.7	0.7	0.7	0.8	1	0	1	0.333333	1	0.333333	0	1	65535	0	65535	-0.3	0.7	-0.514573	65535
CNDP1_HUMAN	Beta-Ala-His dipeptidase	CNDP1	1.2	1	1.1	1.1	1.3	1.2	-7.85046e-16	1	0	1	0	1	1	0	0	1	0	0	1	0	0
PON1_HUMAN	Serum paraoxonase/arylesterase 1	PON1	0.9	0.8	1.4	1	2.8	2.1	-0.76835	0.23165	-0.816497	0.333333	-0.894427	0.333333	0.23165	0	0.635167	0.23165	1.69775	0.35	1.41176	0.4975	1.4
PROF1_HUMAN	Profilin-1	PFN1	0.9	0.8	1.1	1.2	1.3	1.2	-0.948683	0.0513167	-0.816497	0.333333	-0.894427	0.333333	0.0513167	0	1.28974	0.0513167	4.24264	0.3	1.35294	0.436099	3
LYAM1_HUMAN	L-selectin	SELL	1	1	0.9	0.8	0.9	0.8	0.904534	0.095466	0.894427	0.333333	0.942809	0.333333	0.095466	0	1.02015	0.095466	-3	-0.15	0.85	-0.234465	-3
C1QA_HUMAN	Complement C1q subcomponent subunit A	C1QA	0.8	0.9	0.7	1.2	0.6	0.9	-0.267261	0.732739	0	1	0	1	0.732739	0	0.135051	0.732739	0.392232	0.1	1.11765	0.160465	0.333333
TENX_HUMAN	Tenascin-X	TNXB	0.9	0.9	0.6	0.7	0.7	0.9	0.96225	0.0377496	0.894427	0.333333	0.942809	0.333333	0.0377496	0	1.42309	0.0377496	-5	-0.25	0.722222	-0.469485	-5
APOC2_HUMAN	Apolipoprotein C-II	APOC2	1	1	1.6	1.5	1.2	1.1	-0.991837	0.0081634	-0.894427	0.333333	-0.942809	0.333333	0.0081634	1	2.08813	0.0081634	11	0.55	1.55	0.632268	11
VINC_HUMAN	Vinculin	VCL	0.8	0.8	1	0.7	1	1.1	-0.229416	0.770584	0	1	0	1	0.770584	0	0.11318	0.770584	0.333333	0.05	1.0625	0.0874628	0.333333
BTD_HUMAN	Biotinidase	BTD	0.9	1	0.6	0.7	0.7	0.9	0.948683	0.0513167	0.816497	0.333333	0.894427	0.333333	0.0513167	0	1.28974	0.0513167	-4.24264	-0.3	0.684211	-0.547488	-3
CYTC_HUMAN	Cystatin-C	CST3	1	1	0.8	0.7	1	1.1	0.96225	0.0377496	0.894427	0.333333	0.942809	0.333333	0.0377496	0	1.42309	0.0377496	-5	-0.25	0.75	-0.415037	-5
IBP3_HUMAN	Insulin-like growth factor-binding protein 3	IGFBP3	1	1	0.9	0.9	1.2	1.1	1	0	1	0.333333	1	0.333333	0	1	65535	0	65535	-0.1	0.9	-0.152003	65535
FLNA_HUMAN	Filamin-A	FLNA	1	1	1	0.9	1.5	1.2	0.57735	0.42265	0.57735	1	0.57735	1	0.42265	0	0.374019	0.42265	-1	-0.05	0.95	-0.0740006	-1
SEPP1_HUMAN	Selenoprotein P	SEPP1	1	1	0.6	0.7	1	1.2	0.980196	0.0198039	0.894427	0.333333	0.942809	0.333333	0.0198039	0	1.70325	0.0198039	-7	-0.35	0.65	-0.621488	-7
FIBB_HUMAN	Fibrinogen beta chain	FGB	1	0.9	0.5	0.3	0.6	0.5	0.961074	0.0389255	0.816497	0.333333	0.894427	0.333333	0.0389255	0	1.40977	0.0389255	-4.91935	-0.55	0.421053	-1.24793	-3.66667
ZPI_HUMAN	Protein Z-dependent protease inhibitor	SERPINA10	1.1	0.9	1.2	0.9	1.1	0.9	-0.19245	0.80755	-0.223607	1	-0.235702	1	0.80755	0	0.0928306	0.80755	0.27735	0.05	1.05	0.0703893	0.2
CHLE_HUMAN	Cholinesterase	BCHE	1.1	1	0.7	0.6	0.7	0.7	0.970143	0.0298575	0.816497	0.333333	0.894427	0.333333	0.0298575	0	1.52495	0.0298575	-5.65685	-0.4	0.619048	-0.691878	-4
MASP1_HUMAN	Mannan-binding lectin serine protease 1	MASP1	1.1	1.1	1	0.8	1.3	0.9	0.816497	0.183503	0.894427	0.333333	0.942809	0.333333	0.183503	0	0.736356	0.183503	-2	-0.2	0.818182	-0.289507	-2
FA10_HUMAN	Coagulation factor X	F10	1	1	0.8	0.8	1	0.8	1	0	1	0.333333	1	0.333333	0	1	65535	0	65535	-0.2	0.8	-0.321928	65535
CBPB2_HUMAN	Carboxypeptidase B2	CPB2	1	1	1.1	1.2	1.1	0.9	-0.904534	0.095466	-0.894427	0.333333	-0.942809	0.333333	0.095466	0	1.02015	0.095466	3	0.15	1.15	0.201634	3
SAA1_HUMAN	Serum amyloid A-1 protein	SAA1	2.1	2	4.4	3.8	4.1	5.8	-0.97869	0.0213097	-0.816497	0.333333	-0.894427	0.333333	0.0213097	0	1.67142	0.0213097	6.74036	2.05	2	1	5.85714
SAMP_HUMAN	Serum amyloid P-component	APCS	1	1	1.5	1.7	1.5	1.7	-0.973329	0.0266715	-0.894427	0.333333	-0.942809	0.333333	0.0266715	0	1.57395	0.0266715	6	0.6	1.6	0.678072	6
HGFL_HUMAN	Hepatocyte growth factor-like protein	MST1	1	1	0.8	0.7	1	1	0.96225	0.0377496	0.894427	0.333333	0.942809	0.333333	0.0377496	0	1.42309	0.0377496	-5	-0.25	0.75	-0.415037	-5
TENA_HUMAN	Tenascin	TNC	0.9	1	0.7	0.9	1	1	0.688247	0.311753	0.67082	0.666667	0.707107	0.666667	0.311753	0	0.50619	0.311753	-1.34164	-0.15	0.842105	-0.247928	-1
APOC1_HUMAN	Apolipoprotein C-I	APOC1	1	1	1.4	1.5	1.3	1.2	-0.987878	0.0121217	-0.894427	0.333333	-0.942809	0.333333	0.0121217	0	1.91644	0.0121217	9	0.45	1.45	0.536053	9
TLN1_HUMAN	Talin-1	TLN1	1	0.9	1.4	1.1	1.5	1.3	-0.801784	0.198216	-0.816497	0.333333	-0.894427	0.333333	0.198216	0	0.702861	0.198216	1.89737	0.3	1.31579	0.395929	1.5
COMP_HUMAN	Cartilage oligomeric matrix protein	COMP	1.1	1.1	0.5	0.5	0.6	0.4	1	0	1	0.333333	1	0.333333	0	1	65535	0	65535	-0.6	0.454545	-1.1375	65535
CD44_HUMAN	CD44 antigen	CD44	1.1	1.1	0.7	1	0.6	1	0.762493	0.237507	0.894427	0.333333	0.942809	0.333333	0.237507	0	0.624323	0.237507	-1.66667	-0.25	0.772727	-0.371969	-1.66667
CO4A_HUMAN	Complement C4-A	C4A	0.8	0.8	1	1	0.9	0.8	-1	0	-1	0.333333	-1	0.333333	0	1	65535	0	65535	0.2	1.25	0.321928	65535
PRG4_HUMAN	Proteoglycan 4	PRG4	0.8	0.9	1	1	1.1	1.6	-0.904534	0.095466	-0.894427	0.333333	-0.942809	0.333333	0.095466	0	1.02015	0.095466	3	0.15	1.17647	0.234465	3
QSOX1_HUMAN	Sulfhydryl oxidase 1	QSOX1	0.9	1	1.2	1.1	1.7	1.3	-0.894427	0.105573	-0.816497	0.333333	-0.894427	0.333333	0.105573	0	0.976448	0.105573	2.82843	0.2	1.21053	0.275634	2
PHLD_HUMAN	Phosphatidylinositol-glycan-specific phospholipase D	GPLD1	1	1	0.9	1	1	1	0.57735	0.42265	0.57735	1	0.57735	1	0.42265	0	0.374019	0.42265	-1	-0.05	0.95	-0.0740006	-1
PLF4_HUMAN	Platelet factor 4	PF4	1	1	0.5	0.5	0.5	0.5	1	0	1	0.333333	1	0.333333	0	1	65535	0	65535	-0.5	0.5	-1	65535
LBP_HUMAN	Lipopolysaccharide-binding protein	LBP	0.9	1	2.2	4.8	2.4	4.3	-0.810955	0.189045	-0.816497	0.333333	-0.894427	0.333333	0.189045	0	0.723436	0.189045	1.96009	2.55	3.68421	1.88136	1.88889
PI16_HUMAN	Peptidase inhibitor 16	PI16	1.1	1.1	0.3	0.2	0.3	0.2	0.996558	0.00344235	0.894427	0.333333	0.942809	0.333333	0.00344235	1	2.46314	0.00344235	-17	-0.85	0.227273	-2.1375	-17
S10A8_HUMAN	Protein S100-A8	S100A8	1	0.9	4.1	4.5	5.5	5.8	-0.996234	0.00376566	-0.816497	0.333333	-0.894427	0.333333	0.00376566	1	2.42416	0.00376566	16.2499	3.35	4.52632	2.17834	13.4
FA9_HUMAN	Coagulation factor IX	F9	1	1	0.9	1.1	1.2	1.1	-3.92523e-16	1	0	1	0	1	1	0	0	1	0	0	1	0	0
CD14_HUMAN	Monocyte differentiation antigen CD14	CD14	1	1	1.2	0.9	1.5	1.2	-0.229416	0.770584	0	1	0	1	0.770584	0	0.11318	0.770584	0.333333	0.05	1.05	0.0703893	0.333333
GRP78_HUMAN	78 kDa glucose-regulated protein	HSPA5	1.1	1.1	1	1.1	1.3	1.7	0.57735	0.42265	0.57735	1	0.57735	1	0.42265	0	0.374019	0.42265	-1	-0.05	0.954545	-0.0671142	-1
FBLN1_HUMAN	Fibulin-1	FBLN1	1.1	1.1	0.8	0.8	0.8	0.6	1	0	1	0.333333	1	0.333333	0	1	65535	0	65535	-0.3	0.727273	-0.459432	65535
FHR2_HUMAN	Complement factor H-related protein 2	CFHR2	1	0.9	1.1	1.1	1.1	1.1	-0.904534	0.095466	-0.894427	0.333333	-0.942809	0.333333	0.095466	0	1.02015	0.095466	3	0.15	1.15789	0.211504	3
HS90A_HUMAN	Heat shock protein HSP 90-alpha	HSP90AA1	0.7	0	3.8	8.3	2.6	4.5	-0.87066	0.12934	-0.816497	0.333333	-0.894427	0.333333	0.12934	0	0.888268	0.12934	2.50323	5.7	17.2857	4.11151	2.19231
CATA_HUMAN	Catalase	CAT	1.1	1	1.3	1	1.7	1.4	-0.408248	0.591752	-0.223607	1	-0.235702	1	0.591752	0	0.22786	0.591752	0.632456	0.1	1.09524	0.131245	0.5
FETUB_HUMAN	Fetuin-B	FETUB	0.8	0.8	0.7	0.7	0.8	0.9	1	0	1	0.333333	1	0.333333	0	1	65535	0	65535	-0.1	0.875	-0.192645	65535
HABP2_HUMAN	Hyaluronan-binding protein 2	HABP2	1	1	0.7	0.7	0.9	1	1	0	1	0.333333	1	0.333333	0	1	65535	0	65535	-0.3	0.7	-0.514573	65535
ACTN1_HUMAN	Alpha-actinin-1	ACTN1	0.8	0.6	4.1	7.8	7	8.5	-0.89476	0.10524	-0.816497	0.333333	-0.894427	0.333333	0.10524	0	0.977819	0.10524	2.8337	5.25	8.5	3.08746	2.69231
ENOA_HUMAN	Alpha-enolase	ENO1	0.9	0.9	1.3	2.2	1.3	3.1	-0.800499	0.199501	-0.894427	0.333333	-0.942809	0.333333	0.199501	0	0.700054	0.199501	1.88889	0.85	1.94444	0.959358	1.88889
MASP2_HUMAN	Mannan-binding lectin serine protease 2	MASP2	1	1	1	1.1	1.2	0.9	-0.57735	0.42265	-0.57735	1	-0.57735	1	0.42265	0	0.374019	0.42265	1	0.05	1.05	0.0703893	1
PGBM_HUMAN	Basement membrane-specific heparan sulfate proteoglycan core protein	HSPG2	1	1	0.7	0.7	0.9	1.5	1	0	1	0.333333	1	0.333333	0	1	65535	0	65535	-0.3	0.7	-0.514573	65535
TRY1_HUMAN	Trypsin-1	PRSS1	1	1	1	1	1.2	1.3												0	1	0
HYOU1_HUMAN	Hypoxia up-regulated protein 1	HYOU1	0.9	0.9	0.6	1.4	0.7	2	-0.174078	0.825922	0	1	0	1	0.825922	0	0.0830608	0.825922	0.25	0.1	1.11111	0.152003	0.25
FA11_HUMAN	Coagulation factor XI	F11	1	1	0.6	0.6	0.7	0.9	1	0	1	0.333333	1	0.333333	0	1	65535	0	65535	-0.4	0.6	-0.736966	65535
BGH3_HUMAN	Transforming growth factor-beta-induced protein ig-h3	TGFBI	1	1.1	0.7	0.9	0.9	1.2	0.845154	0.154846	0.816497	0.333333	0.894427	0.333333	0.154846	0	0.810101	0.154846	-2.23607	-0.25	0.761905	-0.392317	-1.66667
PLTP_HUMAN	Phospholipid transfer protein	PLTP	0.9	1	1	1	1.4	1.2	-0.57735	0.42265	-0.57735	1	-0.57735	1	0.42265	0	0.374019	0.42265	1	0.05	1.05263	0.0740006	1
APOF_HUMAN	Apolipoprotein F	APOF	1	0.9	1.1	1.1	1.2	1	-0.904534	0.095466	-0.894427	0.333333	-0.942809	0.333333	0.095466	0	1.02015	0.095466	3	0.15	1.15789	0.211504	3
CFAD_HUMAN	Complement factor D	CFD	0.9	0.8	0.7	0.8	1.2	1.2	0.707107	0.292893	0.67082	0.666667	0.707107	0.666667	0.292893	0	0.533291	0.292893	-1.41421	-0.1	0.882353	-0.180572	-1
LDHB_HUMAN	L-lactate dehydrogenase B chain	LDHB	0.9	1	1.7	2.2	1.2	1.5	-0.940721	0.0592791	-0.816497	0.333333	-0.894427	0.333333	0.0592791	0	1.2271	0.0592791	3.92232	1	2.05263	1.03747	3.33333
EZRI_HUMAN	Ezrin	EZR	0	0.9	0	2.9	0	2.9	-0.4222	0.5778	-0.223607	1	-0.235702	1	0.5778	0	0.238223	0.5778	0.658665	1	3.22222	1.68806	0.526316
1433Z_HUMAN	14-3-3 protein zeta/delta	YWHAZ	0.4	0.4	1.6	1.6	1.6	1.4	-1	0	-1	0.333333	-1	0.333333	0	1	65535	0	65535	1.2	4	2	65535
IBP2_HUMAN	Insulin-like growth factor-binding protein 2	IGFBP2	1.5	1.5	2.4	4.1	1.7	2.6	-0.824271	0.175729	-0.894427	0.333333	-0.942809	0.333333	0.175729	0	0.755157	0.175729	2.05882	1.75	2.16667	1.11548	2.05882
ENPL_HUMAN	Endoplasmin	HSP90B1	1	1	1	0.9	1.3	0.9	0.57735	0.42265	0.57735	1	0.57735	1	0.42265	0	0.374019	0.42265	-1	-0.05	0.95	-0.0740006	-1
FHR1_HUMAN	Complement factor H-related protein 1	CFHR1	1	1	1.5	1.5	1.3	0.6	-1	0	-1	0.333333	-1	0.333333	0	1	65535	0	65535	0.5	1.5	0.584963	65535
PROP_HUMAN	Properdin	CFP	1	1	0.8	0.9	1.1	1	0.904534	0.095466	0.894427	0.333333	0.942809	0.333333	0.095466	0	1.02015	0.095466	-3	-0.15	0.85	-0.234465	-3
MYH9_HUMAN	Myosin-9	MYH9	0	0	0	0	0	0												0
DHX9_HUMAN	ATP-dependent RNA helicase A	DHX9	1	1	0.6	1.1	0.7	0.9	0.390567	0.609433	0	1	0	1	0.609433	0	0.215074	0.609433	-0.6	-0.15	0.85	-0.234465	-0.6
VIME_HUMAN	Vimentin	VIM	0.9	0.9	1.8	2.1	1.5	2	-0.980196	0.0198039	-0.894427	0.333333	-0.942809	0.333333	0.0198039	0	1.70325	0.0198039	7	1.05	2.16667	1.11548	7
A4_HUMAN	Amyloid beta A4 protein	APP	1.1	1.2	3.1	0	2.9	1.3	-0.179425	0.820575	0	1	0	1	0.820575	0	0.0858815	0.820575	0.25793	0.4	1.34783	0.430634	0.25
LRP1_HUMAN	Prolow-density lipoprotein receptor-related protein 1	LRP1	1	1	0.4	1.4	0.9	1.6	0.140028	0.859972	0	1	0	1	0.859972	0	0.0655157	0.859972	-0.2	-0.1	0.9	-0.152003	-0.2
DSG2_HUMAN	Desmoglein-2	DSG2	1	1	1	1	1.3	1.1												0	1	0
FCGBP_HUMAN	IgGFc-binding protein	FCGBP	0.9	0.9	1	2.5	1.1	1.8	-0.625355	0.374645	-0.894427	0.333333	-0.942809	0.333333	0.374645	0	0.42638	0.374645	1.13333	0.85	1.94444	0.959358	1.13333
LAMB1_HUMAN	Laminin subunit beta-1	LAMB1	1.1	0.2	0.9	9	0.2	6.9	-0.59803	0.40197	-0.408248	0.666667	-0.447214	0.666667	0.40197	0	0.395807	0.40197	1.05523	4.3	7.61538	2.92892	0.955556
MA1A1_HUMAN	Mannosyl-oligosaccharide 1,2-alpha-mannosidase IA	MAN1A1	1	1	0.8	0.9	1	0.7	0.904534	0.095466	0.894427	0.333333	0.942809	0.333333	0.095466	0	1.02015	0.095466	-3	-0.15	0.85	-0.234465	-3
PZP_HUMAN	Pregnancy zone protein	PZP	1.2	1.3	2.5	8.6	3.8	6.7	-0.705962	0.294038	-0.816497	0.333333	-0.894427	0.333333	0.294038	0	0.531597	0.294038	1.40965	4.3	4.44	2.15056	1.3871
UBR1_HUMAN	E3 ubiquitin-protein ligase UBR1	UBR1	1	1	1.2	1.2	2.1	1.7	-1	0	-1	0.333333	-1	0.333333	0	1	65535	0	65535	0.2	1.2	0.263034	65535
C1RL_HUMAN	Complement C1r subcomponent-like protein	C1RL	1	1	1	0.9	1.4	1.2	0.57735	0.42265	0.57735	1	0.57735	1	0.42265	0	0.374019	0.42265	-1	-0.05	0.95	-0.0740006	-1
CAH1_HUMAN	Carbonic anhydrase 1	CA1	0.9	0.9	1.2	1	1.9	1.4	-0.816497	0.183503	-0.894427	0.333333	-0.942809	0.333333	0.183503	0	0.736356	0.183503	2	0.2	1.22222	0.289507	2
TYB4_HUMAN	Thymosin beta-4	TMSB4X	1	1	0.8	0.7	1.3	1.2	0.96225	0.0377496	0.894427	0.333333	0.942809	0.333333	0.0377496	0	1.42309	0.0377496	-5	-0.25	0.75	-0.415037	-5
FCN3_HUMAN	Ficolin-3	FCN3	1	1	1	1.3	1	1.7	-0.57735	0.42265	-0.57735	1	-0.57735	1	0.42265	0	0.374019	0.42265	1	0.15	1.15	0.201634	1
FHR5_HUMAN	Complement factor H-related protein 5	CFHR5	1.1	1.1	1.3	1.4	1.7	2.4	-0.96225	0.0377496	-0.894427	0.333333	-0.942809	0.333333	0.0377496	0	1.42309	0.0377496	5	0.25	1.22727	0.295456	5
POSTN_HUMAN	Periostin	POSTN	1	1	0.6	0.8	0.6	0.7	0.904534	0.095466	0.894427	0.333333	0.942809	0.333333	0.095466	0	1.02015	0.095466	-3	-0.3	0.7	-0.514573	-3
GP1BA_HUMAN	Platelet glycoprotein Ib alpha chain	GP1BA	1	1	0.7	0.6	0.9	0.9	0.980196	0.0198039	0.894427	0.333333	0.942809	0.333333	0.0198039	0	1.70325	0.0198039	-7	-0.35	0.65	-0.621488	-7
ICAM1_HUMAN	Intercellular adhesion molecule 1	ICAM1	1	1	0.8	1	1.1	1.4	0.57735	0.42265	0.57735	1	0.57735	1	0.42265	0	0.374019	0.42265	-1	-0.1	0.9	-0.152003	-1
MBL2_HUMAN	Mannose-binding protein C	MBL2	1	1	0.8	0.9	0.5	0.6	0.904534	0.095466	0.894427	0.333333	0.942809	0.333333	0.095466	0	1.02015	0.095466	-3	-0.15	0.85	-0.234465	-3
CAP1_HUMAN	Adenylyl cyclase-associated protein 1	CAP1	1	1	1	1.1	1.2	1.9	-0.57735	0.42265	-0.57735	1	-0.57735	1	0.42265	0	0.374019	0.42265	1	0.05	1.05	0.0703893	1
PCSK9_HUMAN	Proprotein convertase subtilisin/kexin type 9	PCSK9	1	1	1.2	0.7	1.8	1.3	0.140028	0.859972	0	1	0	1	0.859972	0	0.0655157	0.859972	-0.2	-0.05	0.95	-0.0740006	-0.2
PSMD1_HUMAN	26S proteasome non-ATPase regulatory subunit 1	PSMD1	1	1	1	1.3	1.5	1.2	-0.57735	0.42265	-0.57735	1	-0.57735	1	0.42265	0	0.374019	0.42265	1	0.15	1.15	0.201634	1
AMPN_HUMAN	Aminopeptidase N	ANPEP	1	1	0.8	1	0.9	1	0.57735	0.42265	0.57735	1	0.57735	1	0.42265	0	0.374019	0.42265	-1	-0.1	0.9	-0.152003	-1
ATRN_HUMAN	Attractin	ATRN	1.1	1.1	0.7	0.8	0.9	1.1	0.980196	0.0198039	0.894427	0.333333	0.942809	0.333333	0.0198039	0	1.70325	0.0198039	-7	-0.35	0.681818	-0.552541	-7
CRAC1_HUMAN	Cartilage acidic protein 1	CRTAC1	0.9	0.8	0.8	1.1	1	1.1	-0.408248	0.591752	-0.223607	1	-0.235702	1	0.591752	0	0.22786	0.591752	0.632456	0.1	1.11765	0.160465	0.5
SODE_HUMAN	Extracellular superoxide dismutase [Cu-Zn]	SOD3	1.1	1.1	0.7	0.8	1.5	1.9	0.980196	0.0198039	0.894427	0.333333	0.942809	0.333333	0.0198039	0	1.70325	0.0198039	-7	-0.35	0.681818	-0.552541	-7
ENPP2_HUMAN	Ectonucleotide pyrophosphatase/phosphodiesterase family member 2	ENPP2	1.1	1	0.6	0.9	0.8	1.4	0.801784	0.198216	0.816497	0.333333	0.894427	0.333333	0.198216	0	0.702861	0.198216	-1.89737	-0.3	0.714286	-0.485427	-1.5
NRP1_HUMAN	Neuropilin-1	NRP1	0.9	0.9	0.5	0.8	0.6	0.8	0.762493	0.237507	0.894427	0.333333	0.942809	0.333333	0.237507	0	0.624323	0.237507	-1.66667	-0.25	0.722222	-0.469485	-1.66667
PRDX2_HUMAN	Peroxiredoxin-2	PRDX2	1	1	0.9	0.8	1	1.2	0.904534	0.095466	0.894427	0.333333	0.942809	0.333333	0.095466	0	1.02015	0.095466	-3	-0.15	0.85	-0.234465	-3
SPRL1_HUMAN	SPARC-like protein 1	SPARCL1	1	1	1	0.8	1.4	1.5	0.57735	0.42265	0.57735	1	0.57735	1	0.42265	0	0.374019	0.42265	-1	-0.1	0.9	-0.152003	-1
TPIS_HUMAN	Triosephosphate isomerase	TPI1	1	1	1	2.1	1.2	2.2	-0.57735	0.42265	-0.57735	1	-0.57735	1	0.42265	0	0.374019	0.42265	1	0.55	1.55	0.632268	1
CO1A1_HUMAN	Collagen alpha-1(I) chain	COL1A1	1.1	1.1	0.3	0.1	0.3	0.1	0.987878	0.0121217	0.894427	0.333333	0.942809	0.333333	0.0121217	0	1.91644	0.0121217	-9	-0.9	0.181818	-2.45943	-9
1433E_HUMAN	14-3-3 protein epsilon	YWHAE	0	0	0	0	0	0												0
LAMP2_HUMAN	Lysosome-associated membrane glycoprotein 2	LAMP2	0.8	0	1.1	0	1.1	29	-0.1541	0.8459	-0.223607	1	-0.235702	1	0.8459	0	0.0726808	0.8459	0.220564	0.15	1.375	0.459432	0.157895
HSP7C_HUMAN	Heat shock cognate 71 kDa protein	HSPA8	1	0.9	2.2	7.1	2.4	8.9	-0.729853	0.270147	-0.816497	0.333333	-0.894427	0.333333	0.270147	0	0.568399	0.270147	1.50989	3.7	4.89474	2.29123	1.48
VASN_HUMAN	Vasorin	VASN	1	1.1	0.9	0.9	1.2	1.2	0.904534	0.095466	0.894427	0.333333	0.942809	0.333333	0.095466	0	1.02015	0.095466	-3	-0.15	0.857143	-0.222392	-3
SODC_HUMAN	Superoxide dismutase [Cu-Zn]	SOD1	1	1	1.1	1	1.1	1.3	-0.57735	0.42265	-0.57735	1	-0.57735	1	0.42265	0	0.374019	0.42265	1	0.05	1.05	0.0703893	1
PVR_HUMAN	Poliovirus receptor	PVR	1	1	1.2	0.6	2	1.3	0.229416	0.770584	0	1	0	1	0.770584	0	0.11318	0.770584	-0.333333	-0.1	0.9	-0.152003	-0.333333
SRCRM_HUMAN	Scavenger receptor cysteine-rich domain-containing protein SCART1		1	1	0.8	0.8	0.7	0.7	1	0	1	0.333333	1	0.333333	0	1	65535	0	65535	-0.2	0.8	-0.321928	65535
FHAD1_HUMAN	Forkhead-associated domain-containing protein 1	FHAD1	0	0	0	0	0	0												0
IPSP_HUMAN	Plasma serine protease inhibitor	SERPINA5	1	1	1	1.4	1	0.7	-0.57735	0.42265	-0.57735	1	-0.57735	1	0.42265	0	0.374019	0.42265	1	0.2	1.2	0.263034	1
APOA1_HUMAN	Apolipoprotein A-I	APOA1	1.1	1.1	0.8	1.4	1.2	2	2.61682e-16	1	0	1	0	1	1	0	0	1	0	0	1	0	0
APOM_HUMAN	Apolipoprotein M	APOM	1	1	1	1.4	1.4	1.3	-0.57735	0.42265	-0.57735	1	-0.57735	1	0.42265	0	0.374019	0.42265	1	0.2	1.2	0.263034	1
NCAM1_HUMAN	Neural cell adhesion molecule 1	NCAM1	1.1	1	0.9	0.6	1.2	0.8	0.801784	0.198216	0.816497	0.333333	0.894427	0.333333	0.198216	0	0.702861	0.198216	-1.89737	-0.3	0.714286	-0.485427	-1.5
ALDOA_HUMAN	Fructose-bisphosphate aldolase A	ALDOA	1	1	1	1	1.1	1.2												0	1	0
NEO1_HUMAN	Neogenin	NEO1	1	1	1	0.8	1	0.9	0.57735	0.42265	0.57735	1	0.57735	1	0.42265	0	0.374019	0.42265	-1	-0.1	0.9	-0.152003	-1
C1QC_HUMAN	Complement C1q subcomponent subunit C	C1QC	0.9	0.9	0.8	0.8	0.8	0.9	1	0	1	0.333333	1	0.333333	0	1	65535	0	65535	-0.1	0.888889	-0.169925	65535
LYSC_HUMAN	Lysozyme C	LYZ	1	1	1.1	1.4	0.9	1	-0.762493	0.237507	-0.894427	0.333333	-0.942809	0.333333	0.237507	0	0.624323	0.237507	1.66667	0.25	1.25	0.321928	1.66667
ACTS_HUMAN	Actin, alpha skeletal muscle	ACTA1	1	0.9	2.1	1.2	2.3	1.5	-0.737865	0.262135	-0.816497	0.333333	-0.894427	0.333333	0.262135	0	0.581475	0.262135	1.54604	0.7	1.73684	0.796467	1.4
HBB_HUMAN	Hemoglobin subunit beta	HBB	1	1	0.8	0.8	1.1	1	1	0	1	0.333333	1	0.333333	0	1	65535	0	65535	-0.2	0.8	-0.321928	65535
MUC18_HUMAN	Cell surface glycoprotein MUC18	MCAM	1.1	1.2	1	1	1.4	1.5	0.904534	0.095466	0.894427	0.333333	0.942809	0.333333	0.095466	0	1.02015	0.095466	-3	-0.15	0.869565	-0.201634	-3
C163A_HUMAN	Scavenger receptor cysteine-rich type 1 protein M130	CD163	1	1	1	0.9	1.2	0.8	0.57735	0.42265	0.57735	1	0.57735	1	0.42265	0	0.374019	0.42265	-1	-0.05	0.95	-0.0740006	-1
CATD_HUMAN	Cathepsin D	CTSD	1	1	1.1	0.8	1.5	1.3	0.229416	0.770584	0	1	0	1	0.770584	0	0.11318	0.770584	-0.333333	-0.05	0.95	-0.0740006	-0.333333
PTPRS_HUMAN	Receptor-type tyrosine-protein phosphatase S	PTPRS	0	0	0	0	0	0												0
CSPG4_HUMAN	Chondroitin sulfate proteoglycan 4	CSPG4	1	0	1.1	0	1.2	0	-0.0475114	0.952489	-0.223607	1	-0.235702	1	0.952489	0	0.0211402	0.952489	0.0672673	0.05	1.1	0.137504	0.047619
ATS13_HUMAN	A disintegrin and metalloproteinase with thrombospondin motifs 13	ADAMTS13	1	1	1.1	0.9	1.2	1.1	-3.92523e-16	1	0	1	0	1	1	0	0	1	0	0	1	0	0
NUCL_HUMAN	Nucleolin	NCL	1.3	0	2.3	24.7	2.2	14.4	-0.629382	0.370618	-0.816497	0.333333	-0.894427	0.333333	0.370618	0	0.431074	0.370618	1.14539	12.85	20.7692	4.37638	1.08439
PROC_HUMAN	Vitamin K-dependent protein C	PROC	1	1	1.1	1	0.9	1.1	-0.57735	0.42265	-0.57735	1	-0.57735	1	0.42265	0	0.374019	0.42265	1	0.05	1.05	0.0703893	1
SPRC_HUMAN	SPARC	SPARC	1	1	0.9	0.5	1.1	0.8	0.727607	0.272393	0.894427	0.333333	0.942809	0.333333	0.272393	0	0.564804	0.272393	-1.5	-0.3	0.7	-0.514573	-1.5
TRFL_HUMAN	Lactotransferrin	LTF	1	1	0.7	1	1.3	1	0.57735	0.42265	0.57735	1	0.57735	1	0.42265	0	0.374019	0.42265	-1	-0.15	0.85	-0.234465	-1
DOPO_HUMAN	Dopamine beta-hydroxylase	DBH	1	1	0.8	0.8	1	0.9	1	0	1	0.333333	1	0.333333	0	1	65535	0	65535	-0.2	0.8	-0.321928	65535
COF1_HUMAN	Cofilin-1	CFL1	1	1	1	0.8	1.2	1.3	0.57735	0.42265	0.57735	1	0.57735	1	0.42265	0	0.374019	0.42265	-1	-0.1	0.9	-0.152003	-1
CO6A1_HUMAN	Collagen alpha-1(VI) chain	COL6A1	1	0.2	0.4	4.9	0.6	0	-0.535639	0.464361	-0.408248	0.666667	-0.447214	0.666667	0.464361	0	0.333144	0.464361	0.897046	2.05	4.41667	2.14296	0.773585
TPM3_HUMAN	Tropomyosin alpha-3 chain	TPM3	0.6	0.6	2.2	0.8	2.8	1.5	-0.672692	0.327308	-0.894427	0.333333	-0.942809	0.333333	0.327308	0	0.485043	0.327308	1.28571	0.9	2.5	1.32193	1.28571
PGAM1_HUMAN	Phosphoglycerate mutase 1	PGAM1	1	1	15.5	3.2	5.3	1.1	-0.692553	0.307447	-0.894427	0.333333	-0.942809	0.333333	0.307447	0	0.512229	0.307447	1.35772	8.35	9.35	3.22497	1.35772
LMNB1_HUMAN	Lamin-B1	LMNB1	0	0	0	0	0	0												0
UBE2N_HUMAN	Ubiquitin-conjugating enzyme E2 N	UBE2N	1	0	0.9	0	1.1	100	0.0524864	0.947514	0.223607	1	0.235702	1	0.947514	0	0.0234145	0.947514	-0.0743294	-0.05	0.9	-0.152003	-0.0526316
PTPRF_HUMAN	Receptor-type tyrosine-protein phosphatase F	PTPRF	1	0	1.1	0	1	0	-0.0475114	0.952489	-0.223607	1	-0.235702	1	0.952489	0	0.0211402	0.952489	0.0672673	0.05	1.1	0.137504	0.047619
CD166_HUMAN	CD166 antigen	ALCAM	1	1	0.6	0.7	0.9	0.6	0.980196	0.0198039	0.894427	0.333333	0.942809	0.333333	0.0198039	0	1.70325	0.0198039	-7	-0.35	0.65	-0.621488	-7
COR1A_HUMAN	Coronin-1A	CORO1A	0.6	0.6	1.8	1.3	3	2.3	-0.937201	0.0627991	-0.894427	0.333333	-0.942809	0.333333	0.0627991	0	1.20205	0.0627991	3.8	0.95	2.58333	1.36923	3.8
LDHA_HUMAN	L-lactate dehydrogenase A chain	LDHA	0.9	0.9	2.6	2.3	2.5	1.7	-0.990764	0.0092357	-0.894427	0.333333	-0.942809	0.333333	0.0092357	1	2.03453	0.0092357	10.3333	1.55	2.72222	1.44478	10.3333
TALDO_HUMAN	Transaldolase	TALDO1	0.9	0.9	1.4	1.1	1.1	1.3	-0.855186	0.144814	-0.894427	0.333333	-0.942809	0.333333	0.144814	0	0.83919	0.144814	2.33333	0.35	1.38889	0.473931	2.33333
IL1AP_HUMAN	Interleukin-1 receptor accessory protein	IL1RAP	1	1	0.8	0.8	1	1.1	1	0	1	0.333333	1	0.333333	0	1	65535	0	65535	-0.2	0.8	-0.321928	65535
CHL1_HUMAN	Neural cell adhesion molecule L1-like protein	CHL1	1	1	0.7	0.8	0.9	1	0.96225	0.0377496	0.894427	0.333333	0.942809	0.333333	0.0377496	0	1.42309	0.0377496	-5	-0.25	0.75	-0.415037	-5
SAA4_HUMAN	Serum amyloid A-4 protein	SAA4	1.1	1.1	2	2	2.4	2.8	-1	0	-1	0.333333	-1	0.333333	0	1	65535	0	65535	0.9	1.81818	0.862496	65535
PTGDS_HUMAN	Prostaglandin-H2 D-isomerase	PTGDS	1	1	0.6	0.6	0.5	0.4	1	0	1	0.333333	1	0.333333	0	1	65535	0	65535	-0.4	0.6	-0.736966	65535
COBA2_HUMAN	Collagen alpha-2(XI) chain	COL11A2	1	1	0.6	0.4	0.9	0.4	0.96225	0.0377496	0.894427	0.333333	0.942809	0.333333	0.0377496	0	1.42309	0.0377496	-5	-0.5	0.5	-1	-5
VP13A_HUMAN	Vacuolar protein sorting-associated protein 13A	VPS13A	0	1	0	1.4	0	1.8	-0.162221	0.837779	-0.223607	1	-0.235702	1	0.837779	0	0.0768707	0.837779	0.232495	0.2	1.4	0.485427	0.166667
NUCB1_HUMAN	Nucleobindin-1	NUCB1	0	0	0	0	0	0												0
KIT_HUMAN	Mast/stem cell growth factor receptor Kit	KIT	1	1	0.8	1	0.4	0.6	0.57735	0.42265	0.57735	1	0.57735	1	0.42265	0	0.374019	0.42265	-1	-0.1	0.9	-0.152003	-1
K1C9_HUMAN	Keratin, type I cytoskeletal 9	KRT9	0	0	0	0	0	0												0
CALD1_HUMAN	Caldesmon	CALD1	1.2	1.1	1.2	0.6	1.8	1.2	0.502519	0.497481	0.223607	1	0.235702	1	0.497481	0	0.303223	0.497481	-0.821995	-0.25	0.782609	-0.353637	-0.714286
MEGF8_HUMAN	Multiple epidermal growth factor-like domains protein 8	MEGF8	0	0	0	0	0	0												0
UB2V2_HUMAN	Ubiquitin-conjugating enzyme E2 variant 2	UBE2V2	1	1	0.9	0.9	1.2	1	1	0	1	0.333333	1	0.333333	0	1	65535	0	65535	-0.1	0.9	-0.152003	65535
VGFR3_HUMAN	Vascular endothelial growth factor receptor 3	FLT4	1	0	1	0	0.9	0	0	1	0	1	0	1	1	0	0	1	0	0	1	0	0
APOC4_HUMAN	Apolipoprotein C-IV	APOC4	1	1	1.3	2.5	1.1	2.7	-0.727607	0.272393	-0.894427	0.333333	-0.942809	0.333333	0.272393	0	0.564804	0.272393	1.5	0.9	1.9	0.925999	1.5
PTPRJ_HUMAN	Receptor-type tyrosine-protein phosphatase eta	PTPRJ	1	1	0.7	1.2	0.8	1.5	0.140028	0.859972	0	1	0	1	0.859972	0	0.0655157	0.859972	-0.2	-0.05	0.95	-0.0740006	-0.2
CALR_HUMAN	Calreticulin	CALR	1.1	1.1	0.8	1.4	1.1	1.5	2.61682e-16	1	0	1	0	1	1	0	0	1	0	0	1	0	0
GPV_HUMAN	Platelet glycoprotein V	GP5	1	1	1.4	0.8	0.6	1	-0.229416	0.770584	0	1	0	1	0.770584	0	0.11318	0.770584	0.333333	0.1	1.1	0.137504	0.333333
1433G_HUMAN	14-3-3 protein gamma	YWHAG	1	1	1.5	2.1	2.3	3	-0.883452	0.116548	-0.894427	0.333333	-0.942809	0.333333	0.116548	0	0.933496	0.116548	2.66667	0.8	1.8	0.847997	2.66667
TRML1_HUMAN	Trem-like transcript 1 protein	TREML1	1	1	1.2	1.3	1.3	1.2	-0.96225	0.0377496	-0.894427	0.333333	-0.942809	0.333333	0.0377496	0	1.42309	0.0377496	5	0.25	1.25	0.321928	5
LRRF2_HUMAN	Leucine-rich repeat flightless-interacting protein 2	LRRFIP2	1	1	1.1	1.2	1.4	1.7	-0.904534	0.095466	-0.894427	0.333333	-0.942809	0.333333	0.095466	0	1.02015	0.095466	3	0.15	1.15	0.201634	3
CE162_HUMAN	Centrosomal protein of 162 kDa	KIAA1009	1	0	0.9	0	1.6	0	0.0524864	0.947514	0.223607	1	0.235702	1	0.947514	0	0.0234145	0.947514	-0.0743294	-0.05	0.9	-0.152003	-0.0526316
LTBP1_HUMAN	Latent-transforming growth factor beta-binding protein 1	LTBP1	0	1	0	1.2	0	1.2	-0.090167	0.909833	-0.223607	1	-0.235702	1	0.909833	0	0.0410383	0.909833	0.128037	0.1	1.2	0.263034	0.0909091
CAD13_HUMAN	Cadherin-13	CDH13	1	1	0.9	0.8	0.9	1.4	0.904534	0.095466	0.894427	0.333333	0.942809	0.333333	0.095466	0	1.02015	0.095466	-3	-0.15	0.85	-0.234465	-3
TKT_HUMAN	Transketolase	TKT	1.1	1.1	1.2	1.4	1.3	1.3	-0.816497	0.183503	-0.894427	0.333333	-0.942809	0.333333	0.183503	0	0.736356	0.183503	2	0.2	1.18182	0.241008	2
CAH2_HUMAN	Carbonic anhydrase 2	CA2	0.9	1	1.2	1.4	1.7	1.8	-0.911322	0.0886776	-0.816497	0.333333	-0.894427	0.333333	0.0886776	0	1.05219	0.0886776	3.1305	0.35	1.36842	0.452512	2.33333
F13A_HUMAN	Coagulation factor XIII A chain	F13A1	1.1	1.1	0.8	0.8	1.1	0.8	1	0	1	0.333333	1	0.333333	0	1	65535	0	65535	-0.3	0.727273	-0.459432	65535
ALDOB_HUMAN	Fructose-bisphosphate aldolase B	ALDOB	1	1	1	1.1	1.2	1.7	-0.57735	0.42265	-0.57735	1	-0.57735	1	0.42265	0	0.374019	0.42265	1	0.05	1.05	0.0703893	1
B2MG_HUMAN	Beta-2-microglobulin	B2M	1	1	0.9	0.8	0.5	0.4	0.904534	0.095466	0.894427	0.333333	0.942809	0.333333	0.095466	0	1.02015	0.095466	-3	-0.15	0.85	-0.234465	-3
GOLM1_HUMAN	Golgi membrane protein 1	GOLM1	1	1	0.8	0.4	0.9	0	0.816497	0.183503	0.894427	0.333333	0.942809	0.333333	0.183503	0	0.736356	0.183503	-2	-0.4	0.6	-0.736966	-2
GDIR1_HUMAN	Rho GDP-dissociation inhibitor 1	ARHGDIA	0.8	0.8	1.9	0.8	1.5	0.5	-0.57735	0.42265	-0.57735	1	-0.57735	1	0.42265	0	0.374019	0.42265	1	0.55	1.6875	0.754888	1
PROZ_HUMAN	Vitamin K-dependent protein Z	PROZ	1.1	1.1	1.1	1.3	1.4	1.8	-0.57735	0.42265	-0.57735	1	-0.57735	1	0.42265	0	0.374019	0.42265	1	0.1	1.09091	0.125531	1
PCOC1_HUMAN	Procollagen C-endopeptidase enhancer 1	PCOLCE	1	1	0.5	1	0.7	0.8	0.57735	0.42265	0.57735	1	0.57735	1	0.42265	0	0.374019	0.42265	-1	-0.25	0.75	-0.415037	-1
CI050_HUMAN	Uncharacterized protein C9orf50	C9orf50	1	0	0.8	0	1	0	0.109764	0.890236	0.223607	1	0.235702	1	0.890236	0	0.050495	0.890236	-0.156174	-0.1	0.8	-0.321928	-0.111111
GNPTG_HUMAN	N-acetylglucosamine-1-phosphotransferase subunit gamma	GNPTG	0.9	0.9	1.1	1.7	1.1	1.9	-0.762493	0.237507	-0.894427	0.333333	-0.942809	0.333333	0.237507	0	0.624323	0.237507	1.66667	0.5	1.55556	0.63743	1.66667
BLMH_HUMAN	Bleomycin hydrolase	BLMH	0.7	0	0.9	20.7	0.3	17.2	-0.597907	0.402093	-0.816497	0.333333	-0.894427	0.333333	0.402093	0	0.395674	0.402093	1.0549	10.45	30.8571	4.94753	1.01951
CADH1_HUMAN	Cadherin-1	CDH1	1	1	1	0.6	0.9	1.2	0.57735	0.42265	0.57735	1	0.57735	1	0.42265	0	0.374019	0.42265	-1	-0.2	0.8	-0.321928	-1
HEG1_HUMAN	Protein HEG homolog 1	HEG1	1	0.9	1.3	1.8	0	2.4	-0.857143	0.142857	-0.816497	0.333333	-0.894427	0.333333	0.142857	0	0.845098	0.142857	2.35339	0.6	1.63158	0.706269	2
PABP1_HUMAN	Polyadenylate-binding protein 1	PABPC1	0	0	0	0	0	0												0
NOE1_HUMAN	Noelin	OLFM1	1	0	0.6	0	0.8	0	0.235702	0.764298	0.223607	1	0.235702	1	0.764298	0	0.116737	0.764298	-0.342997	-0.2	0.6	-0.736966	-0.25
G6PI_HUMAN	Glucose-6-phosphate isomerase	GPI	1	1	5.4	1.9	4	1.8	-0.730843	0.269157	-0.894427	0.333333	-0.942809	0.333333	0.269157	0	0.569995	0.269157	1.51429	2.65	3.65	1.8679	1.51429
ANXA1_HUMAN	Annexin A1	ANXA1	0	0	0	0	0	0												0
FIBG_HUMAN	Fibrinogen gamma chain	FGG	0.9	0.9	0.5	0.6	0.6	0.6	0.980196	0.0198039	0.894427	0.333333	0.942809	0.333333	0.0198039	0	1.70325	0.0198039	-7	-0.35	0.611111	-0.710493	-7
FSTL1_HUMAN	Follistatin-related protein 1	FSTL1	0	0	0	0	0	0												0
NID1_HUMAN	Nidogen-1	NID1	1	1	0.7	1.5	0.8	2.1	-0.174078	0.825922	0	1	0	1	0.825922	0	0.0830608	0.825922	0.25	0.1	1.1	0.137504	0.25
HBA_HUMAN	Hemoglobin subunit alpha	HBA1	1	1	0.8	1	1	1	0.57735	0.42265	0.57735	1	0.57735	1	0.42265	0	0.374019	0.42265	-1	-0.1	0.9	-0.152003	-1
GGH_HUMAN	Gamma-glutamyl hydrolase	GGH	1	1	0.9	2.4	0.7	0.7	-0.522514	0.477486	0	1	0	1	0.477486	0	0.321039	0.477486	0.866667	0.65	1.65	0.722466	0.866667
COTL1_HUMAN	Coactosin-like protein	COTL1	1.5	1.4	2	2.2	2	1.2	-0.971666	0.0283344	-0.816497	0.333333	-0.894427	0.333333	0.0283344	0	1.54769	0.0283344	5.81378	0.65	1.44828	0.534336	4.33333
LASP1_HUMAN	LIM and SH3 domain protein 1	LASP1	1	1.1	1	3.4	1.4	4	-0.560642	0.439358	-0.223607	1	-0.235702	1	0.439358	0	0.357182	0.439358	0.957503	1.15	2.09524	1.06711	0.92
VASP_HUMAN	Vasodilator-stimulated phosphoprotein	VASP	1.2	1.2	1	1.6	1.7	3.4	-0.229416	0.770584	0	1	0	1	0.770584	0	0.11318	0.770584	0.333333	0.1	1.08333	0.115477	0.333333
ITA6_HUMAN	Integrin alpha-6	ITGA6	0	0	0	0	0	0												0
WDR87_HUMAN	WD repeat-containing protein 87	WDR87	1	0	1.5	0	1.4	0	-0.19245	0.80755	-0.223607	1	-0.235702	1	0.80755	0	0.0928306	0.80755	0.27735	0.25	1.5	0.584963	0.2
PDIA1_HUMAN	Protein disulfide-isomerase	P4HB	1	1	1	0.7	1.4	0.7	0.57735	0.42265	0.57735	1	0.57735	1	0.42265	0	0.374019	0.42265	-1	-0.15	0.85	-0.234465	-1
C4BPA_HUMAN	C4b-binding protein alpha chain	C4BPA	0.8	0.8	1	1.1	1.1	0.9	-0.96225	0.0377496	-0.894427	0.333333	-0.942809	0.333333	0.0377496	0	1.42309	0.0377496	5	0.25	1.3125	0.392317	5
STMN1_HUMAN	Stathmin	STMN1	0	2.1	100	21.1	100	10.2	-0.729358	0.270642	-0.816497	0.333333	-0.894427	0.333333	0.270642	0	0.567605	0.270642	1.5077	59.5	57.6667	5.84967	1.46914
THIO_HUMAN	Thioredoxin	TXN	1	1.1	1.3	0	1.3	2.4	0.398015	0.601985	0	1	0	1	0.601985	0	0.220414	0.601985	-0.613572	-0.4	0.619048	-0.691878	-0.571429
PPBT_HUMAN	Alkaline phosphatase, tissue-nonspecific isozyme	ALPL	1	1	0.8	1	0.7	1	0.57735	0.42265	0.57735	1	0.57735	1	0.42265	0	0.374019	0.42265	-1	-0.1	0.9	-0.152003	-1
DBNL_HUMAN	Drebrin-like protein	DBNL	0	1	0	0.5	42.6	1.3	0.301511	0.698489	0.223607	1	0.235702	1	0.698489	0	0.155841	0.698489	-0.447214	-0.25	0.5	-1	-0.333333
KKCC2_HUMAN	Calcium/calmodulin-dependent protein kinase kinase 2	CAMKK2	0	0	0	0	0	0												0
APOA_HUMAN	Apolipoprotein(a)	LPA	1	0	1	0	0.4	0	0	1	0	1	0	1	1	0	0	1	0	0	1	0	0
LAMA2_HUMAN	Laminin subunit alpha-2	LAMA2	1	0	1.7	0	0	0	-0.243414	0.756586	-0.223607	1	-0.235702	1	0.756586	0	0.121142	0.756586	0.354914	0.35	1.7	0.765535	0.259259
ACY1_HUMAN	Aminoacylase-1	ACY1	0	1	0	0.4	0	0.6	0.366508	0.633492	0.223607	1	0.235702	1	0.633492	0	0.198259	0.633492	-0.557086	-0.3	0.4	-1.32193	-0.428571
MYH11_HUMAN	Myosin-11	MYH11	1	0	0.5	0	1	0	0.301511	0.698489	0.223607	1	0.235702	1	0.698489	0	0.155841	0.698489	-0.447214	-0.25	0.5	-1	-0.333333
NINL_HUMAN	Ninein-like protein	NINL	0	1	0	0.7	0	1.1	0.171219	0.828781	0.223607	1	0.235702	1	0.828781	0	0.0815602	0.828781	-0.24577	-0.15	0.7	-0.514573	-0.176471
RHG23_HUMAN	Rho GTPase-activating protein 23	ARHGAP23	0	1	0	1.1	0	1.2	-0.0475114	0.952489	-0.223607	1	-0.235702	1	0.952489	0	0.0211402	0.952489	0.0672673	0.05	1.1	0.137504	0.047619
ICAM2_HUMAN	Intercellular adhesion molecule 2	ICAM2	1.1	1.1	0.7	0.8	1.1	0.7	0.980196	0.0198039	0.894427	0.333333	0.942809	0.333333	0.0198039	0	1.70325	0.0198039	-7	-0.35	0.681818	-0.552541	-7
RARR2_HUMAN	Retinoic acid receptor responder protein 2	RARRES2	1	1	1	0.8	1.2	0.8	0.57735	0.42265	0.57735	1	0.57735	1	0.42265	0	0.374019	0.42265	-1	-0.1	0.9	-0.152003	-1
FCG3A_HUMAN	Low affinity immunoglobulin gamma Fc region receptor III-A	FCGR3A	0.9	0.9	0.8	1.1	1	1	-0.229416	0.770584	0	1	0	1	0.770584	0	0.11318	0.770584	0.333333	0.05	1.05556	0.0780025	0.333333
CSF1R_HUMAN	Macrophage colony-stimulating factor 1 receptor	CSF1R	1.3	1.3	1.4	1.1	2.3	1.8	0.229416	0.770584	0	1	0	1	0.770584	0	0.11318	0.770584	-0.333333	-0.05	0.961538	-0.0565835	-0.333333
BASP1_HUMAN	Brain acid soluble protein 1	BASP1	1	1	1.9	1.7	1.4	1	-0.984732	0.0152681	-0.894427	0.333333	-0.942809	0.333333	0.0152681	0	1.81622	0.0152681	8	0.8	1.8	0.847997	8
LG3BP_HUMAN	Galectin-3-binding protein	LGALS3BP	0.1	1	47.3	0.8	62.1	0.9	-0.581395	0.418605	-0.408248	0.666667	-0.447214	0.666667	0.418605	0	0.378195	0.418605	1.01056	23.5	43.7273	5.45046	0.991561
ROA1_HUMAN	Heterogeneous nuclear ribonucleoprotein A1	HNRNPA1	0.4	0	2.8	0	1.1	0	-0.514496	0.485504	-0.223607	1	-0.235702	1	0.485504	0	0.313807	0.485504	0.848528	1.2	7	2.80735	0.75
SH3L3_HUMAN	SH3 domain-binding glutamic acid-rich-like protein 3	SH3BGRL3	1	1	1.2	0.7	1.2	0.6	0.140028	0.859972	0	1	0	1	0.859972	0	0.0655157	0.859972	-0.2	-0.05	0.95	-0.0740006	-0.2
ROA2_HUMAN	Heterogeneous nuclear ribonucleoproteins A2/B1	HNRNPA2B1	0	1	0	1.2	0	1.2	-0.090167	0.909833	-0.223607	1	-0.235702	1	0.909833	0	0.0410383	0.909833	0.128037	0.1	1.2	0.263034	0.0909091
CALM_HUMAN	Calmodulin	CALM1	1.1	1.1	0.8	1.1	1.1	0.9	0.57735	0.42265	0.57735	1	0.57735	1	0.42265	0	0.374019	0.42265	-1	-0.15	0.863636	-0.211504	-1
CLC11_HUMAN	C-type lectin domain family 11 member A	CLEC11A	1	1	1.5	0.9	2.7	0.9	-0.426401	0.573599	0	1	0	1	0.573599	0	0.241392	0.573599	0.666667	0.2	1.2	0.263034	0.666667
EPHA7_HUMAN	Ephrin type-A receptor 7	EPHA7	0	0	0	0	0	0												0
BAHC1_HUMAN	BAH and coiled-coil domain-containing protein 1	BAHCC1	0	0	0	0	0	0												0
HENMT_HUMAN	Small RNA 2'-O-methyltransferase	HENMT1	1	0	0	0	1.3	0	0.57735	0.42265	0.57735	1	0.57735	1	0.42265	0	0.374019	0.42265	-1	-0.5	0	65535	-1
ASCC2_HUMAN	Activating signal cointegrator 1 complex subunit 2	ASCC2	1	0	0.9	0	1.2	0	0.0524864	0.947514	0.223607	1	0.235702	1	0.947514	0	0.0234145	0.947514	-0.0743294	-0.05	0.9	-0.152003	-0.0526316
K22E_HUMAN	Keratin, type II cytoskeletal 2 epidermal	KRT2	0	0	0	0	0	0												0
SDPR_HUMAN	Serum deprivation-response protein	SDPR	1	1	0.6	1	0.9	1.3	0.57735	0.42265	0.57735	1	0.57735	1	0.42265	0	0.374019	0.42265	-1	-0.2	0.8	-0.321928	-1
HSP71_HUMAN	Heat shock 70 kDa protein 1A/1B	HSPA1A	0	0	0	0	0	0												0
MRC1_HUMAN	Macrophage mannose receptor 1	MRC1	1	1	1.1	1.1	0.8	2.2	-1	0	-1	0.333333	-1	0.333333	0	1	65535	0	65535	0.1	1.1	0.137504	65535
PGK1_HUMAN	Phosphoglycerate kinase 1	PGK1	1	1	1.9	1.1	2	1.5	-0.662266	0.337734	-0.894427	0.333333	-0.942809	0.333333	0.337734	0	0.471425	0.337734	1.25	0.5	1.5	0.584963	1.25
PTPRG_HUMAN	Receptor-type tyrosine-protein phosphatase gamma	PTPRG	1	1	0	0.7	0	0.6	0.795587	0.204413	0.894427	0.333333	0.942809	0.333333	0.204413	0	0.689492	0.204413	-1.85714	-0.65	0.35	-1.51457	-1.85714
FBLN3_HUMAN	EGF-containing fibulin-like extracellular matrix protein 1	EFEMP1	1.4	1.4	1.2	1.6	1.1	2.1	-3.92523e-16	1	0	1	0	1	1	0	0	1	0	0	1	0	0
DEF3_HUMAN	Neutrophil defensin 3	DEFA3	0	1	70.5	2.6	0	2.7	-0.600391	0.399609	-0.816497	0.333333	-0.894427	0.333333	0.399609	0	0.398365	0.399609	1.06174	36.05	73.1	6.1918	1.04644
HNRPK_HUMAN	Heterogeneous nuclear ribonucleoprotein K	HNRNPK	0.9	0.9	0.7	1.5	0	2.2	-0.333333	0.666667	0	1	0	1	0.666667	0	0.176091	0.666667	0.5	0.2	1.22222	0.289507	0.5
GSTP1_HUMAN	Glutathione S-transferase P	GSTP1	0	0	0	0	0	0												0
SIA7A_HUMAN	Alpha-N-acetylgalactosaminide alpha-2,6-sialyltransferase 1	ST6GALNAC1	1	0	1.1	0	1	0	-0.0475114	0.952489	-0.223607	1	-0.235702	1	0.952489	0	0.0211402	0.952489	0.0672673	0.05	1.1	0.137504	0.047619
ADIPO_HUMAN	Adiponectin	ADIPOQ	1	1	0.5	0.8	1	1	0.855186	0.144814	0.894427	0.333333	0.942809	0.333333	0.144814	0	0.83919	0.144814	-2.33333	-0.35	0.65	-0.621488	-2.33333
BMP1_HUMAN	Bone morphogenetic protein 1	BMP1	0	0	0	0	0	0												0
KIF2A_HUMAN	Kinesin-like protein KIF2A	KIF2A	0	1	0	0.6	0	1.3	0.235702	0.764298	0.223607	1	0.235702	1	0.764298	0	0.116737	0.764298	-0.342997	-0.2	0.6	-0.736966	-0.25
DEN4B_HUMAN	DENN domain-containing protein 4B	DENND4B	1	0	0.8	0	1.1	0	0.109764	0.890236	0.223607	1	0.235702	1	0.890236	0	0.050495	0.890236	-0.156174	-0.1	0.8	-0.321928	-0.111111
UBA1_HUMAN	Ubiquitin-like modifier-activating enzyme 1	UBA1	1	0.1	1.3	13.4	1.3	7.9	-0.621141	0.378859	-0.816497	0.333333	-0.894427	0.333333	0.378859	0	0.421522	0.378859	1.12087	6.8	13.3636	3.74024	1.04615
EGLN_HUMAN	Endoglin	ENG	1	1	0.8	0.6	0.8	0.7	0.904534	0.095466	0.894427	0.333333	0.942809	0.333333	0.095466	0	1.02015	0.095466	-3	-0.3	0.7	-0.514573	-3
CAPG_HUMAN	Macrophage-capping protein	CAPG	1	0	0.7	62.9	0.6	100	-0.579768	0.420232	-0.408248	0.666667	-0.447214	0.666667	0.420232	0	0.376511	0.420232	1.0063	31.3	63.6	5.99095	0.990506
RL40_HUMAN	Ubiquitin-60S ribosomal protein L40	UBA52	1	1	0.8	1.1	1.5	1.3	0.229416	0.770584	0	1	0	1	0.770584	0	0.11318	0.770584	-0.333333	-0.05	0.95	-0.0740006	-0.333333
1C07_HUMAN	HLA class I histocompatibility antigen, Cw-7 alpha chain	HLA-C	0	0	0	0	0	0												0
PODXL_HUMAN	Podocalyxin	PODXL	1	1	0.7	1.9	1.2	1.5	-0.333333	0.666667	0	1	0	1	0.666667	0	0.176091	0.666667	0.5	0.3	1.3	0.378512	0.5
MTPN_HUMAN	Myotrophin	MTPN	1	1	0.6	0.9	0.6	0.8	0.762493	0.237507	0.894427	0.333333	0.942809	0.333333	0.237507	0	0.624323	0.237507	-1.66667	-0.25	0.75	-0.415037	-1.66667
1A11_HUMAN	HLA class I histocompatibility antigen, A-11 alpha chain	HLA-A	0	0	0	0	0	0												0
AATC_HUMAN	Aspartate aminotransferase, cytoplasmic	GOT1	0	0	0	0	0	0												0
RBM39_HUMAN	RNA-binding protein 39	RBM39	0	0	0	0	0	0												0
1433B_HUMAN	14-3-3 protein beta/alpha	YWHAB	0	0	0	0	0	0												0
ANAG_HUMAN	Alpha-N-acetylglucosaminidase	NAGLU	1	1	0.7	0.8	0.9	0.7	0.96225	0.0377496	0.894427	0.333333	0.942809	0.333333	0.0377496	0	1.42309	0.0377496	-5	-0.25	0.75	-0.415037	-5
GDIR2_HUMAN	Rho GDP-dissociation inhibitor 2	ARHGDIB	1	1	1	0.7	1.2	1.1	0.57735	0.42265	0.57735	1	0.57735	1	0.42265	0	0.374019	0.42265	-1	-0.15	0.85	-0.234465	-1
BST1_HUMAN	ADP-ribosyl cyclase 2	BST1	1	0	0.5	100	0.5	100	-0.577331	0.422669	-0.408248	0.666667	-0.447214	0.666667	0.422669	0	0.373999	0.422669	0.99995	49.75	100.5	6.65105	0.99005
PEBP1_HUMAN	Phosphatidylethanolamine-binding protein 1	PEBP1	1	1	1.9	1.6	1.7	1.5	-0.96225	0.0377496	-0.894427	0.333333	-0.942809	0.333333	0.0377496	0	1.42309	0.0377496	5	0.75	1.75	0.807355	5
PPIB_HUMAN	Peptidyl-prolyl cis-trans isomerase B	PPIB	1	1	0.8	1.2	0.7	1.1	0	1	0	1	0	1	1	0	0	1	0	0	1	0	0
K2C1_HUMAN	Keratin, type II cytoskeletal 1	KRT1	1	1	1	0.8	1.2	1	0.57735	0.42265	0.57735	1	0.57735	1	0.42265	0	0.374019	0.42265	-1	-0.1	0.9	-0.152003	-1
FUCO2_HUMAN	Plasma alpha-L-fucosidase	FUCA2	0	1.1	0	1.2	0	1.2	-0.0433963	0.956604	-0.223607	1	-0.235702	1	0.956604	0	0.0192679	0.956604	0.0614295	0.05	1.09091	0.125531	0.0434783
ICAM3_HUMAN	Intercellular adhesion molecule 3	ICAM3	1	0	0.5	91.1	0.5	100	-0.577327	0.422673	-0.408248	0.666667	-0.447214	0.666667	0.422673	0	0.373995	0.422673	0.999939	45.3	91.6	6.51728	0.989083
COL11_HUMAN	Collectin-11	COLEC11	0.9	0.9	0.7	0.7	0.7	0.6	1	0	1	0.333333	1	0.333333	0	1	65535	0	65535	-0.2	0.777778	-0.36257	65535
TARSH_HUMAN	Target of Nesh-SH3	ABI3BP	0.9	0.9	0.6	0.6	0.9	0.9	1	0	1	0.333333	1	0.333333	0	1	65535	0	65535	-0.3	0.666667	-0.584963	65535
KAD1_HUMAN	Adenylate kinase isoenzyme 1	AK1	1	0.8	0.6	8.5	0.6	8.7	-0.546866	0.453134	0	1	0	1	0.453134	0	0.343774	0.453134	0.923755	3.65	5.05556	2.33787	0.901235
6PGD_HUMAN	6-phosphogluconate dehydrogenase, decarboxylating	PGD	1.1	1	2.8	1.4	1.9	1.3	-0.726735	0.273265	-0.816497	0.333333	-0.894427	0.333333	0.273265	0	0.563416	0.273265	1.49619	1.05	2	1	1.4
ALDOC_HUMAN	Fructose-bisphosphate aldolase C	ALDOC	1	1	0.9	1.1	0.8	1.3	-3.92523e-16	1	0	1	0	1	1	0	0	1	0	0	1	0	0
FGL2_HUMAN	Fibroleukin	FGL2	1	1	0.5	0.8	0.8	1.7	0.855186	0.144814	0.894427	0.333333	0.942809	0.333333	0.144814	0	0.83919	0.144814	-2.33333	-0.35	0.65	-0.621488	-2.33333
CSDE1_HUMAN	Cold shock domain-containing protein E1	CSDE1	1	0	0.9	0	1.7	0	0.0524864	0.947514	0.223607	1	0.235702	1	0.947514	0	0.0234145	0.947514	-0.0743294	-0.05	0.9	-0.152003	-0.0526316
CDHR2_HUMAN	Cadherin-related family member 2	CDHR2	0	1	0	0.8	0	1.1	0.109764	0.890236	0.223607	1	0.235702	1	0.890236	0	0.050495	0.890236	-0.156174	-0.1	0.8	-0.321928	-0.111111
ARHGB_HUMAN	Rho guanine nucleotide exchange factor 11	ARHGEF11	0	0	0	0	0	0												0
MMRN1_HUMAN	Multimerin-1	MMRN1	0	1	0	1.5	0	1.9	-0.19245	0.80755	-0.223607	1	-0.235702	1	0.80755	0	0.0928306	0.80755	0.27735	0.25	1.5	0.584963	0.2
EPHA4_HUMAN	Ephrin type-A receptor 4	EPHA4	0	1	0	1.4	0	1.4	-0.162221	0.837779	-0.223607	1	-0.235702	1	0.837779	0	0.0768707	0.837779	0.232495	0.2	1.4	0.485427	0.166667
CA2D1_HUMAN	Voltage-dependent calcium channel subunit alpha-2/delta-1	CACNA2D1	0	1	0	0.6	0	1.2	0.235702	0.764298	0.223607	1	0.235702	1	0.764298	0	0.116737	0.764298	-0.342997	-0.2	0.6	-0.736966	-0.25
FBX39_HUMAN	F-box only protein 39	FBXO39	0	0	0	0	0	0												0
LCAT_HUMAN	Phosphatidylcholine-sterol acyltransferase	LCAT	1	1	1.1	0.9	1.3	0.9	-3.92523e-16	1	0	1	0	1	1	0	0	1	0	0	1	0	0
1B07_HUMAN (+1)	HLA class I histocompatibility antigen, B-7 alpha chain	HLA-B	1	1	1.2	1	1.2	1.3	-0.57735	0.42265	-0.57735	1	-0.57735	1	0.42265	0	0.374019	0.42265	1	0.1	1.1	0.137504	1
CNTN1_HUMAN	Contactin-1	CNTN1	1	1	0.5	0.9	0.7	0.8	0.727607	0.272393	0.894427	0.333333	0.942809	0.333333	0.272393	0	0.564804	0.272393	-1.5	-0.3	0.7	-0.514573	-1.5
TGON2_HUMAN	Trans-Golgi network integral membrane protein 2	TGOLN2	1	0	0	0	1.9	0	0.57735	0.42265	0.57735	1	0.57735	1	0.42265	0	0.374019	0.42265	-1	-0.5	0	65535	-1
ENOG_HUMAN	Gamma-enolase	ENO2	0	0	0	0	0	0												0
MTG2_HUMAN	Mitochondrial ribosome-associated GTPase 2	MTG2	1	1	0.9	1.1	1.4	1.5	-3.92523e-16	1	0	1	0	1	1	0	0	1	0	0	1	0	0
BABA1_HUMAN	BRISC and BRCA1-A complex member 1	BABAM1	0	1	29.4	0	0	0	-0.563812	0.436188	-0.223607	1	-0.235702	1	0.436188	0	0.360326	0.436188	0.965428	14.2	29.4	4.87774	0.934211
CSTN1_HUMAN	Calsyntenin-1	CLSTN1	1	1	0.6	0	1.1	0.6	0.855186	0.144814	0.894427	0.333333	0.942809	0.333333	0.144814	0	0.83919	0.144814	-2.33333	-0.7	0.3	-1.73697	-2.33333
IGF2_HUMAN	Insulin-like growth factor II	IGF2	1	1	0.7	1.2	0.9	1.3	0.140028	0.859972	0	1	0	1	0.859972	0	0.0655157	0.859972	-0.2	-0.05	0.95	-0.0740006	-0.2
AMPD2_HUMAN	AMP deaminase 2	AMPD2	0	0	0	0	0	0												0
PGCA_HUMAN	Aggrecan core protein	ACAN	1	1	0	0.7	1.5	0	0.795587	0.204413	0.894427	0.333333	0.942809	0.333333	0.204413	0	0.689492	0.204413	-1.85714	-0.65	0.35	-1.51457	-1.85714
FA49B_HUMAN	Protein FAM49B	FAM49B	0	0	0	0	0	0												0
LAMP1_HUMAN	Lysosome-associated membrane glycoprotein 1	LAMP1	1	1	0.5	0.8	0.8	1.4	0.855186	0.144814	0.894427	0.333333	0.942809	0.333333	0.144814	0	0.83919	0.144814	-2.33333	-0.35	0.65	-0.621488	-2.33333
ICOSL_HUMAN	ICOS ligand	ICOSLG	1	1	0.6	0.6	0.9	0.8	1	0	1	0.333333	1	0.333333	0	1	65535	0	65535	-0.4	0.6	-0.736966	65535
NHRF1_HUMAN	Na(+)/H(+) exchange regulatory cofactor NHE-RF1	SLC9A3R1	0	1	100	1	100	0	-0.581199	0.418801	-0.67082	0.666667	-0.707107	0.666667	0.418801	0	0.377992	0.418801	1.01005	50	101	6.65821	1
ROBO4_HUMAN	Roundabout homolog 4	ROBO4	1	0	1.2	0	1.4	0	-0.090167	0.909833	-0.223607	1	-0.235702	1	0.909833	0	0.0410383	0.909833	0.128037	0.1	1.2	0.263034	0.0909091
KPYM_HUMAN	Pyruvate kinase PKM	PKM	1	0	0.8	0	0.7	0	0.109764	0.890236	0.223607	1	0.235702	1	0.890236	0	0.050495	0.890236	-0.156174	-0.1	0.8	-0.321928	-0.111111
B3GN1_HUMAN	N-acetyllactosaminide beta-1,3-N-acetylglucosaminyltransferase	B3GNT1	1	0	1.3	0	1.7	0	-0.128271	0.871729	-0.223607	1	-0.235702	1	0.871729	0	0.0596184	0.871729	0.182913	0.15	1.3	0.378512	0.130435
PTPRC_HUMAN	Receptor-type tyrosine-protein phosphatase C	PTPRC	0	1	0	0.8	0	0.9	0.109764	0.890236	0.223607	1	0.235702	1	0.890236	0	0.050495	0.890236	-0.156174	-0.1	0.8	-0.321928	-0.111111
IASPP_HUMAN	RelA-associated inhibitor	PPP1R13L	0	1	0	0	0	1.2	0.57735	0.42265	0.57735	1	0.57735	1	0.42265	0	0.374019	0.42265	-1	-0.5	0	65535	-1
MMP8_HUMAN	Neutrophil collagenase	MMP8	0	1	0	1.7	0	5.6	-0.243414	0.756586	-0.223607	1	-0.235702	1	0.756586	0	0.121142	0.756586	0.354914	0.35	1.7	0.765535	0.259259
G6PE_HUMAN	GDH/6PGL endoplasmic bifunctional protein	H6PD	1	1	1.3	1.2	1.3	1.1	-0.96225	0.0377496	-0.894427	0.333333	-0.942809	0.333333	0.0377496	0	1.42309	0.0377496	5	0.25	1.25	0.321928	5
SAA2_HUMAN	Serum amyloid A-2 protein	SAA2	1	1	1.1	0.9	1.9	1.2	-3.92523e-16	1	0	1	0	1	1	0	0	1	0	0	1	0	0
TTHY_HUMAN	Transthyretin	TTR	1	1	0.3	0.4	0.4	0.6	0.994135	0.00586515	0.894427	0.333333	0.942809	0.333333	0.00586515	1	2.23172	0.00586515	-13	-0.65	0.35	-1.51457	-13
PARK7_HUMAN	Protein DJ-1	PARK7	1	1	1	1.4	1.4	1.8	-0.57735	0.42265	-0.57735	1	-0.57735	1	0.42265	0	0.374019	0.42265	1	0.2	1.2	0.263034	1
SRGN_HUMAN	Serglycin	SRGN	1	1	0.7	0.6	0.8	0.9	0.980196	0.0198039	0.894427	0.333333	0.942809	0.333333	0.0198039	0	1.70325	0.0198039	-7	-0.35	0.65	-0.621488	-7
ILF3_HUMAN	Interleukin enhancer-binding factor 3	ILF3	1	0	1.3	100	0	100	-0.58352	0.41648	-0.816497	0.333333	-0.894427	0.333333	0.41648	0	0.380405	0.41648	1.01616	50.15	101.3	6.66249	1.00602
S38AA_HUMAN	Putative sodium-coupled neutral amino acid transporter 10	SLC38A10	1	1.1	1.2	5.3	1.2	7.2	-0.604386	0.395614	-0.816497	0.333333	-0.894427	0.333333	0.395614	0	0.402729	0.395614	1.07285	2.2	3.09524	1.63005	1.04762
LSAMP_HUMAN	Limbic system-associated membrane protein	LSAMP	0	0	0	0	0	0												0
GGCT_HUMAN	Gamma-glutamylcyclotransferase	GGCT	0.2	0.7	12.7	6.5	13.3	10.8	-0.901281	0.098719	-0.816497	0.333333	-0.894427	0.333333	0.098719	0	1.0056	0.098719	2.94206	9.15	21.3333	4.41504	2.73134
MENT_HUMAN	Protein MENT	MENT	1	1.5	0.7	12.2	1	18.7	-0.538376	0.461624	0	1	0	1	0.461624	0	0.335712	0.461624	0.903494	5.2	5.16	2.36737	0.866667
RB11A_HUMAN (+1)	Ras-related protein Rab-11A	RAB11A	1	1	1	1.1	0.7	2.4	-0.57735	0.42265	-0.57735	1	-0.57735	1	0.42265	0	0.374019	0.42265	1	0.05	1.05	0.0703893	1
LYVE1_HUMAN	Lymphatic vessel endothelial hyaluronic acid receptor 1	LYVE1	1	1	0.7	0.7	0.8	0.8	1	0	1	0.333333	1	0.333333	0	1	65535	0	65535	-0.3	0.7	-0.514573	65535
DMP4_HUMAN	Extracellular serine/threonine protein kinase FAM20C	FAM20C	0	1	0	0.9	0	1	0.0524864	0.947514	0.223607	1	0.235702	1	0.947514	0	0.0234145	0.947514	-0.0743294	-0.05	0.9	-0.152003	-0.0526316
ACTBL_HUMAN	Beta-actin-like protein 2	ACTBL2	1	0	0.7	0	1	0	0.171219	0.828781	0.223607	1	0.235702	1	0.828781	0	0.0815602	0.828781	-0.24577	-0.15	0.7	-0.514573	-0.176471
MA2A1_HUMAN	Alpha-mannosidase 2	MAN2A1	0	1	0	1.8	0	0	-0.264906	0.735094	-0.223607	1	-0.235702	1	0.735094	0	0.133657	0.735094	0.388514	0.4	1.8	0.847997	0.285714
HNRPR_HUMAN	Heterogeneous nuclear ribonucleoprotein R	HNRNPR	0	0	0	0	0	0												0
ACE_HUMAN	Angiotensin-converting enzyme	ACE	1	0	1.1	0	0.9	0	-0.0475114	0.952489	-0.223607	1	-0.235702	1	0.952489	0	0.0211402	0.952489	0.0672673	0.05	1.1	0.137504	0.047619
LAMC1_HUMAN	Laminin subunit gamma-1	LAMC1	1	0	0.6	0	0.6	0	0.235702	0.764298	0.223607	1	0.235702	1	0.764298	0	0.116737	0.764298	-0.342997	-0.2	0.6	-0.736966	-0.25
AKA12_HUMAN	A-kinase anchor protein 12	AKAP12	0	0	0	0	0	0												0
KDIS_HUMAN	Kinase D-interacting substrate of 220 kDa	KIDINS220	1	0	0	0	1	0	0.57735	0.42265	0.57735	1	0.57735	1	0.42265	0	0.374019	0.42265	-1	-0.5	0	65535	-1
CNN2_HUMAN	Calponin-2	CNN2	1	1	1.6	1	1.7	1.4	-0.57735	0.42265	-0.57735	1	-0.57735	1	0.42265	0	0.374019	0.42265	1	0.3	1.3	0.378512	1
PSB1_HUMAN	Proteasome subunit beta type-1	PSMB1	1	1	1.1	1	0.5	0.7	-0.57735	0.42265	-0.57735	1	-0.57735	1	0.42265	0	0.374019	0.42265	1	0.05	1.05	0.0703893	1
OAF_HUMAN	Out at first protein homolog	OAF	1	1	0.8	1.5	0.6	1.9	-0.290021	0.709979	0	1	0	1	0.709979	0	0.148754	0.709979	0.428571	0.15	1.15	0.201634	0.428571
TSP4_HUMAN	Thrombospondin-4	THBS4	1	1	0.6	0.4	0.6	0.3	0.96225	0.0377496	0.894427	0.333333	0.942809	0.333333	0.0377496	0	1.42309	0.0377496	-5	-0.5	0.5	-1	-5
CMGA_HUMAN	Chromogranin-A	CHGA	1	0	0	0	0.9	0	0.57735	0.42265	0.57735	1	0.57735	1	0.42265	0	0.374019	0.42265	-1	-0.5	0	65535	-1
PVRL1_HUMAN	Poliovirus receptor-related protein 1	PVRL1	1	1	0.8	0.6	1.3	0.9	0.904534	0.095466	0.894427	0.333333	0.942809	0.333333	0.095466	0	1.02015	0.095466	-3	-0.3	0.7	-0.514573	-3
PSA1_HUMAN	Proteasome subunit alpha type-1	PSMA1	1	1	2.1	2.7	1.3	1.3	-0.95702	0.0429797	-0.894427	0.333333	-0.942809	0.333333	0.0429797	0	1.36674	0.0429797	4.66667	1.4	2.4	1.26303	4.66667
ENDD1_HUMAN	Endonuclease domain-containing 1 protein	ENDOD1	0	1	0	0	0	1.2	0.57735	0.42265	0.57735	1	0.57735	1	0.42265	0	0.374019	0.42265	-1	-0.5	0	65535	-1
RINI_HUMAN	Ribonuclease inhibitor	RNH1	1	1	1.1	0.4	1	0.5	0.450835	0.549165	0	1	0	1	0.549165	0	0.260297	0.549165	-0.714286	-0.25	0.75	-0.415037	-0.714286
1433T_HUMAN	14-3-3 protein theta	YWHAQ	0.9	0	2.9	0	2.9	0	-0.4222	0.5778	-0.223607	1	-0.235702	1	0.5778	0	0.238223	0.5778	0.658665	1	3.22222	1.68806	0.526316
RAB7A_HUMAN	Ras-related protein Rab-7a	RAB7A	1	0	0.7	0	1.2	0	0.171219	0.828781	0.223607	1	0.235702	1	0.828781	0	0.0815602	0.828781	-0.24577	-0.15	0.7	-0.514573	-0.176471
FAT4_HUMAN	Protocadherin Fat 4	FAT4	0	0	0	0	0	0												0
NPM_HUMAN	Nucleophosmin	NPM1	0	1	0	1.3	0	1.5	-0.128271	0.871729	-0.223607	1	-0.235702	1	0.871729	0	0.0596184	0.871729	0.182913	0.15	1.3	0.378512	0.130435
PIGO_HUMAN	GPI ethanolamine phosphate transferase 3	PIGO	0	1	0	1.1	0	3.6	-0.0475114	0.952489	-0.223607	1	-0.235702	1	0.952489	0	0.0211402	0.952489	0.0672673	0.05	1.1	0.137504	0.047619
DAG1_HUMAN	Dystroglycan	DAG1	1	0	0.6	0	1.2	0	0.235702	0.764298	0.223607	1	0.235702	1	0.764298	0	0.116737	0.764298	-0.342997	-0.2	0.6	-0.736966	-0.25
PSA7_HUMAN	Proteasome subunit alpha type-7	PSMA7	0	0.1	0	15.5	0	11.9	-0.574851	0.425149	-0.223607	1	-0.235702	1	0.425149	0	0.371459	0.425149	0.993528	7.7	155	7.27612	0.987179
DPP4_HUMAN	Dipeptidyl peptidase 4	DPP4	0	0.9	0	0.9	0	0.8	0	1	0	1	0	1	1	0	0	1	0	0	1	0	0
TSP2_HUMAN	Thrombospondin-2	THBS2	0	1	0	0.8	0	0.8	0.109764	0.890236	0.223607	1	0.235702	1	0.890236	0	0.050495	0.890236	-0.156174	-0.1	0.8	-0.321928	-0.111111
MICLK_HUMAN	MICAL C-terminal-like protein	MICALCL	0	1	0	0.8	0	1.1	0.109764	0.890236	0.223607	1	0.235702	1	0.890236	0	0.050495	0.890236	-0.156174	-0.1	0.8	-0.321928	-0.111111
TBA4A_HUMAN	Tubulin alpha-4A chain	TUBA4A	0	1	0	0.8	0	2	0.109764	0.890236	0.223607	1	0.235702	1	0.890236	0	0.050495	0.890236	-0.156174	-0.1	0.8	-0.321928	-0.111111
TCP4_HUMAN	Activated RNA polymerase II transcriptional coactivator p15	SUB1	0	0	0	0	0	0												0
PSB4_HUMAN	Proteasome subunit beta type-4	PSMB4	0	0	0	0	0	0												0
ETHE1_HUMAN	Persulfide dioxygenase ETHE1, mitochondrial	ETHE1	1	0	42.7	0	60.3	0	-0.568125	0.431875	-0.223607	1	-0.235702	1	0.431875	0	0.364642	0.431875	0.976313	20.85	42.7	5.41616	0.954233
SET_HUMAN	Protein SET	SET	0	0	0	0	0	0												0
SH3L1_HUMAN	SH3 domain-binding glutamic acid-rich-like protein	SH3BGRL	1	1	1.7	1.8	2.3	1.9	-0.995585	0.00441503	-0.894427	0.333333	-0.942809	0.333333	0.00441503	1	2.35507	0.00441503	15	0.75	1.75	0.807355	15
TN13B_HUMAN	Tumor necrosis factor ligand superfamily member 13B	TNFSF13B	1	1	2.7	0.5	3	1.9	-0.359856	0.640144	0	1	0	1	0.640144	0	0.193722	0.640144	0.545455	0.6	1.6	0.678072	0.545455
ASC_HUMAN	Apoptosis-associated speck-like protein containing a CARD	PYCARD	0	0	0	0	0	0												0
MYLK_HUMAN	Myosin light chain kinase, smooth muscle	MYLK	1	0	0.7	100	1.3	100	-0.578878	0.421122	-0.408248	0.666667	-0.447214	0.666667	0.421122	0	0.375592	0.421122	1.00398	49.85	100.7	6.65392	0.994018
OSTP_HUMAN	Osteopontin	SPP1	1	1	1.8	0.9	1.5	0.4	-0.4819	0.5181	0	1	0	1	0.5181	0	0.285586	0.5181	0.777778	0.35	1.35	0.432959	0.777778
IGF1_HUMAN	Insulin-like growth factor I	IGF1	1	1	0.9	0.9	1.1	0.9	1	0	1	0.333333	1	0.333333	0	1	65535	0	65535	-0.1	0.9	-0.152003	65535
TCTP_HUMAN	Translationally-controlled tumor protein	TPT1	1	1	0.7	1.3	0.9	2.3	0	1	0	1	0	1	1	0	0	1	0	0	1	0	0
ML12A_HUMAN (+1)	Myosin regulatory light chain 12A	MYL12A	0	1	73.6	0.7	0	1.4	-0.57942	0.42058	-0.408248	0.666667	-0.447214	0.666667	0.42058	0	0.376152	0.42058	1.00539	36.65	74.3	6.21529	0.991881
FKB1A_HUMAN	Peptidyl-prolyl cis-trans isomerase FKBP1A	FKBP1A	1	1	1.5	1.4	1.5	1.4	-0.987878	0.0121217	-0.894427	0.333333	-0.942809	0.333333	0.0121217	0	1.91644	0.0121217	9	0.45	1.45	0.536053	9
TIMP1_HUMAN	Metalloproteinase inhibitor 1	TIMP1	1	1	1	0.6	1	0.7	0.57735	0.42265	0.57735	1	0.57735	1	0.42265	0	0.374019	0.42265	-1	-0.2	0.8	-0.321928	-1
NOTC1_HUMAN	Neurogenic locus notch homolog protein 1	NOTCH1	1	0	1.1	0	1	0	-0.0475114	0.952489	-0.223607	1	-0.235702	1	0.952489	0	0.0211402	0.952489	0.0672673	0.05	1.1	0.137504	0.047619
TPM2_HUMAN	Tropomyosin beta chain	TPM2	0	1	0	0	0	0.9	0.57735	0.42265	0.57735	1	0.57735	1	0.42265	0	0.374019	0.42265	-1	-0.5	0	65535	-1
FUCO_HUMAN	Tissue alpha-L-fucosidase	FUCA1	1	1	0.4	0.9	0.9	1.2	0.703526	0.296474	0.894427	0.333333	0.942809	0.333333	0.296474	0	0.528014	0.296474	-1.4	-0.35	0.65	-0.621488	-1.4
IBP6_HUMAN	Insulin-like growth factor-binding protein 6	IGFBP6	0.8	0.7	1	1	1.3	1	-0.96225	0.0377496	-0.894427	0.333333	-0.942809	0.333333	0.0377496	0	1.42309	0.0377496	5	0.25	1.33333	0.415037	5
EP15R_HUMAN	Epidermal growth factor receptor substrate 15-like 1	EPS15L1	0	0	0	0	0	0												0
PLXA2_HUMAN	Plexin-A2	PLXNA2	0	0	0	0	0	0												0
CSRP1_HUMAN	Cysteine and glycine-rich protein 1	CSRP1	1	0	0.8	0	1.6	0	0.109764	0.890236	0.223607	1	0.235702	1	0.890236	0	0.050495	0.890236	-0.156174	-0.1	0.8	-0.321928	-0.111111
PDLI1_HUMAN	PDZ and LIM domain protein 1	PDLIM1	0	1	0	0.8	0	1.5	0.109764	0.890236	0.223607	1	0.235702	1	0.890236	0	0.050495	0.890236	-0.156174	-0.1	0.8	-0.321928	-0.111111
PSA5_HUMAN	Proteasome subunit alpha type-5	PSMA5	0	1	0	0.9	0	0	0.0524864	0.947514	0.223607	1	0.235702	1	0.947514	0	0.0234145	0.947514	-0.0743294	-0.05	0.9	-0.152003	-0.0526316
RSBNL_HUMAN	Round spermatid basic protein 1-like protein	RSBN1L	0	0	0	0	0	0												0
A1AG1_HUMAN	Alpha-1-acid glycoprotein 1	ORM1	1	0	0.4	0	0.6	0	0.366508	0.633492	0.223607	1	0.235702	1	0.633492	0	0.198259	0.633492	-0.557086	-0.3	0.4	-1.32193	-0.428571
LMAN2_HUMAN	Vesicular integral-membrane protein VIP36	LMAN2	0	1	0	0	0	0	0.57735	0.42265	0.57735	1	0.57735	1	0.42265	0	0.374019	0.42265	-1	-0.5	0	65535	-1
DPB1_HUMAN	HLA class II histocompatibility antigen, DP beta 1 chain	HLA-DPB1	1	0	0.9	0	0	0	0.0524864	0.947514	0.223607	1	0.235702	1	0.947514	0	0.0234145	0.947514	-0.0743294	-0.05	0.9	-0.152003	-0.0526316
SF3B2_HUMAN	Splicing factor 3B subunit 2	SF3B2	0	1	0	0.8	0	0	0.109764	0.890236	0.223607	1	0.235702	1	0.890236	0	0.050495	0.890236	-0.156174	-0.1	0.8	-0.321928	-0.111111
IF122_HUMAN	Intraflagellar transport protein 122 homolog	IFT122	1	0	1.6	0	1.5	0	-0.219382	0.780618	-0.223607	1	-0.235702	1	0.780618	0	0.107561	0.780618	0.317999	0.3	1.6	0.678072	0.230769
PSA4_HUMAN	Proteasome subunit alpha type-4	PSMA4	0	0	0	0	0	0												0
RB15B_HUMAN	Putative RNA-binding protein 15B	RBM15B	0	0	0	0	0	0												0
GLPK2_HUMAN	Glycerol kinase 2	GK2	0	0	0	0	0	0												0
VAC14_HUMAN	Protein VAC14 homolog	VAC14	1	0	0	0	1.2	0	0.57735	0.42265	0.57735	1	0.57735	1	0.42265	0	0.374019	0.42265	-1	-0.5	0	65535	-1
CR3L3_HUMAN	Cyclic AMP-responsive element-binding protein 3-like protein 3	CREB3L3	0	1	100	1.8	100	1.1	-0.587387	0.412613	-0.816497	0.333333	-0.894427	0.333333	0.412613	0	0.384457	0.412613	1.02642	50.4	101.8	6.66959	1.01613
RD23B_HUMAN	UV excision repair protein RAD23 homolog B	RAD23B	1	1	1.6	1.1	1	1.2	-0.703526	0.296474	-0.894427	0.333333	-0.942809	0.333333	0.296474	0	0.528014	0.296474	1.4	0.35	1.35	0.432959	1.4
SNX3_HUMAN	Sorting nexin-3	SNX3	0	0	0	0	0	0												0
IGJ_HUMAN	Immunoglobulin J chain	IGJ	1	0	0.6	22.1	0.8	47.4	-0.580498	0.419502	-0.408248	0.666667	-0.447214	0.666667	0.419502	0	0.377266	0.419502	1.00821	10.85	22.7	4.50462	0.964444
IGKC_HUMAN	Ig kappa chain C region	IGKC	1	1	0.7	1.2	1.7	2.8	0.140028	0.859972	0	1	0	1	0.859972	0	0.0655157	0.859972	-0.2	-0.05	0.95	-0.0740006	-0.2
KCY_HUMAN	UMP-CMP kinase	CMPK1	0	1	0	0.7	0	1	0.171219	0.828781	0.223607	1	0.235702	1	0.828781	0	0.0815602	0.828781	-0.24577	-0.15	0.7	-0.514573	-0.176471
GAPR1_HUMAN	Golgi-associated plant pathogenesis-related protein 1	GLIPR2	1	0	0.9	0	0.7	0	0.0524864	0.947514	0.223607	1	0.235702	1	0.947514	0	0.0234145	0.947514	-0.0743294	-0.05	0.9	-0.152003	-0.0526316
SBP1_HUMAN	Selenium-binding protein 1	SELENBP1	0	1	0	0	0	0	0.57735	0.42265	0.57735	1	0.57735	1	0.42265	0	0.374019	0.42265	-1	-0.5	0	65535	-1
CP46A_HUMAN	Cholesterol 24-hydroxylase	CYP46A1	0	1	0	1	0	0.7	0	1	0	1	0	1	1	0	0	1	0	0	1	0	0
GLO2_HUMAN	Hydroxyacylglutathione hydrolase, mitochondrial	HAGH	0	1	0	1.2	0	1.2	-0.090167	0.909833	-0.223607	1	-0.235702	1	0.909833	0	0.0410383	0.909833	0.128037	0.1	1.2	0.263034	0.0909091
CQ105_HUMAN	Uncharacterized protein C17orf105	C17orf105	0	0	0	0	0	0												0
PIGR_HUMAN	Polymeric immunoglobulin receptor	PIGR	0.2	0	5.6	0	0	0	-0.563111	0.436889	-0.223607	1	-0.235702	1	0.436889	0	0.359629	0.436889	0.963671	2.7	28	4.80735	0.931034
CLIC1_HUMAN	Chloride intracellular channel protein 1	CLIC1	1	0	2.6	0	3.2	0	-0.376288	0.623712	-0.223607	1	-0.235702	1	0.623712	0	0.205016	0.623712	0.574367	0.8	2.6	1.37851	0.444444
CD109_HUMAN	CD109 antigen	CD109	1	0	2.3	0	3.7	0	-0.344137	0.655863	-0.223607	1	-0.235702	1	0.655863	0	0.183187	0.655863	0.518344	0.65	2.3	1.20163	0.393939
TBB8L_HUMAN	Tubulin beta-8 chain-like protein LOC260334		0	1	0	1.8	0	1.6	-0.264906	0.735094	-0.223607	1	-0.235702	1	0.735094	0	0.133657	0.735094	0.388514	0.4	1.8	0.847997	0.285714
DPEP2_HUMAN	Dipeptidase 2	DPEP2	0	1	0	0.4	0	1	0.366508	0.633492	0.223607	1	0.235702	1	0.633492	0	0.198259	0.633492	-0.557086	-0.3	0.4	-1.32193	-0.428571
B3GN2_HUMAN	UDP-GlcNAc:betaGal beta-1,3-N-acetylglucosaminyltransferase 2	B3GNT2	1	0	0.9	0	0.8	0	0.0524864	0.947514	0.223607	1	0.235702	1	0.947514	0	0.0234145	0.947514	-0.0743294	-0.05	0.9	-0.152003	-0.0526316
PYGL_HUMAN	Glycogen phosphorylase, liver form	PYGL	0	0	0	0	0	0												0
LEUK_HUMAN	Leukosialin	SPN	0	0	0	0	0	0												0
CNPY2_HUMAN	Protein canopy homolog 2	CNPY2	0	0	0	0	0	0												0
ATF6B_HUMAN	Cyclic AMP-dependent transcription factor ATF-6 beta	ATF6B	1	0	0.5	0	0.9	0	0.301511	0.698489	0.223607	1	0.235702	1	0.698489	0	0.155841	0.698489	-0.447214	-0.25	0.5	-1	-0.333333
CO1A2_HUMAN	Collagen alpha-2(I) chain	COL1A2	0	1	0	0.9	0	1.6	0.0524864	0.947514	0.223607	1	0.235702	1	0.947514	0	0.0234145	0.947514	-0.0743294	-0.05	0.9	-0.152003	-0.0526316
PCD18_HUMAN	Protocadherin-18	PCDH18	1	0	0.6	0	1	0	0.235702	0.764298	0.223607	1	0.235702	1	0.764298	0	0.116737	0.764298	-0.342997	-0.2	0.6	-0.736966	-0.25
GOLI4_HUMAN	Golgi integral membrane protein 4	GOLIM4	0	1	0	1.2	0	1.1	-0.090167	0.909833	-0.223607	1	-0.235702	1	0.909833	0	0.0410383	0.909833	0.128037	0.1	1.2	0.263034	0.0909091
K0947_HUMAN	Uncharacterized protein KIAA0947	KIAA0947	0	0	0	0	0	0												0
TULP4_HUMAN	Tubby-related protein 4	TULP4	0	0	0	0	0	0												0
IBP4_HUMAN	Insulin-like growth factor-binding protein 4	IGFBP4	1	1	0.9	0.5	1.4	0.5	0.727607	0.272393	0.894427	0.333333	0.942809	0.333333	0.272393	0	0.564804	0.272393	-1.5	-0.3	0.7	-0.514573	-1.5
APEX1_HUMAN	DNA-(apurinic or apyrimidinic site) lyase	APEX1	0	0	0	0	0	0												0
CUTA_HUMAN	Protein CutA	CUTA	1	1	1.5	0.6	0.7	0.5	-0.078326	0.921674	0	1	0	1	0.921674	0	0.0354227	0.921674	0.111111	0.05	1.05	0.0703893	0.111111
ABRAL_HUMAN	Costars family protein ABRACL	ABRACL	1	0	0.8	100	0.7	0	-0.579652	0.420348	-0.408248	0.666667	-0.447214	0.666667	0.420348	0	0.376391	0.420348	1.006	49.9	100.8	6.65535	0.996008
G3BP1_HUMAN	Ras GTPase-activating protein-binding protein 1	G3BP1	0	0	0	0	0	0												0
LEG1_HUMAN	Galectin-1	LGALS1	1	1	0.8	0.6	0.6	0.3	0.904534	0.095466	0.894427	0.333333	0.942809	0.333333	0.095466	0	1.02015	0.095466	-3	-0.3	0.7	-0.514573	-3
AN32A_HUMAN	Acidic leucine-rich nuclear phosphoprotein 32 family member A	ANP32A	0	0	0	0	0	0												0
MMP2_HUMAN	72 kDa type IV collagenase	MMP2	1	0	0.8	0	0.9	0	0.109764	0.890236	0.223607	1	0.235702	1	0.890236	0	0.050495	0.890236	-0.156174	-0.1	0.8	-0.321928	-0.111111
CD5L_HUMAN	CD5 antigen-like	CD5L	1	0	1.3	0	1.4	0	-0.128271	0.871729	-0.223607	1	-0.235702	1	0.871729	0	0.0596184	0.871729	0.182913	0.15	1.3	0.378512	0.130435
PLEK_HUMAN	Pleckstrin	PLEK	1	0	0.8	0	1.2	0	0.109764	0.890236	0.223607	1	0.235702	1	0.890236	0	0.050495	0.890236	-0.156174	-0.1	0.8	-0.321928	-0.111111
ACBP_HUMAN	Acyl-CoA-binding protein	DBI	0	0	0	0	0	0												0
TIE1_HUMAN	Tyrosine-protein kinase receptor Tie-1	TIE1	0	1	0	1.5	0	1.9	-0.19245	0.80755	-0.223607	1	-0.235702	1	0.80755	0	0.0928306	0.80755	0.27735	0.25	1.5	0.584963	0.2
GRN_HUMAN	Granulins	GRN	1	0	1.5	0	1.6	0	-0.19245	0.80755	-0.223607	1	-0.235702	1	0.80755	0	0.0928306	0.80755	0.27735	0.25	1.5	0.584963	0.2
CH3L1_HUMAN	Chitinase-3-like protein 1	CHI3L1	1	0	1.2	0	1.4	0	-0.090167	0.909833	-0.223607	1	-0.235702	1	0.909833	0	0.0410383	0.909833	0.128037	0.1	1.2	0.263034	0.0909091
UFO_HUMAN	Tyrosine-protein kinase receptor UFO	AXL	0	1	0	0.7	0	1	0.171219	0.828781	0.223607	1	0.235702	1	0.828781	0	0.0815602	0.828781	-0.24577	-0.15	0.7	-0.514573	-0.176471
OIT3_HUMAN	Oncoprotein-induced transcript 3 protein	OIT3	0	1	0	0.7	0	0.8	0.171219	0.828781	0.223607	1	0.235702	1	0.828781	0	0.0815602	0.828781	-0.24577	-0.15	0.7	-0.514573	-0.176471
CALU_HUMAN	Calumenin	CALU	1	0	1	0	0.9	0	0	1	0	1	0	1	1	0	0	1	0	0	1	0	0
FSCN1_HUMAN	Fascin	FSCN1	1	0	0	0	0	0	0.57735	0.42265	0.57735	1	0.57735	1	0.42265	0	0.374019	0.42265	-1	-0.5	0	65535	-1
DJC21_HUMAN	DnaJ homolog subfamily C member 21	DNAJC21	0	0	0	0	0	0												0
SNED1_HUMAN	Sushi, nidogen and EGF-like domain-containing protein 1	SNED1	1	0	0.8	0	1.5	0	0.109764	0.890236	0.223607	1	0.235702	1	0.890236	0	0.050495	0.890236	-0.156174	-0.1	0.8	-0.321928	-0.111111
PSB8_HUMAN	Proteasome subunit beta type-8	PSMB8	1	0	1.1	0	1.7	0	-0.0475114	0.952489	-0.223607	1	-0.235702	1	0.952489	0	0.0211402	0.952489	0.0672673	0.05	1.1	0.137504	0.047619
APMAP_HUMAN	Adipocyte plasma membrane-associated protein	APMAP	0	1	0	1.9	0	3	-0.284179	0.715821	-0.223607	1	-0.235702	1	0.715821	0	0.145196	0.715821	0.419172	0.45	1.9	0.925999	0.310345
PDIA3_HUMAN	Protein disulfide-isomerase A3	PDIA3	0	0	0	0	0	0												0
HMGN2_HUMAN	Non-histone chromosomal protein HMG-17	HMGN2	0	0	0	0	0	0												0
CAMP_HUMAN	Cathelicidin antimicrobial peptide	CAMP	1	0	1.9	0	2.2	0	-0.284179	0.715821	-0.223607	1	-0.235702	1	0.715821	0	0.145196	0.715821	0.419172	0.45	1.9	0.925999	0.310345
SYTL4_HUMAN	Synaptotagmin-like protein 4	SYTL4	0	0	0	0	0	0												0
SRP54_HUMAN	Signal recognition particle 54 kDa protein	SRP54	1	0	0.5	0	0	0	0.301511	0.698489	0.223607	1	0.235702	1	0.698489	0	0.155841	0.698489	-0.447214	-0.25	0.5	-1	-0.333333
NEXN_HUMAN	Nexilin	NEXN	1	0	1.1	0	1	0	-0.0475114	0.952489	-0.223607	1	-0.235702	1	0.952489	0	0.0211402	0.952489	0.0672673	0.05	1.1	0.137504	0.047619
A1AT_HUMAN	Alpha-1-antitrypsin	SERPINA1	1	0	1.3	0	1.4	0	-0.128271	0.871729	-0.223607	1	-0.235702	1	0.871729	0	0.0596184	0.871729	0.182913	0.15	1.3	0.378512	0.130435
RAB14_HUMAN	Ras-related protein Rab-14	RAB14	1	1	1	1.1	1	1.3	-0.57735	0.42265	-0.57735	1	-0.57735	1	0.42265	0	0.374019	0.42265	1	0.05	1.05	0.0703893	1
LIRA3_HUMAN	Leukocyte immunoglobulin-like receptor subfamily A member 3	LILRA3	1	1	1.4	1.2	2	0.9	-0.904534	0.095466	-0.894427	0.333333	-0.942809	0.333333	0.095466	0	1.02015	0.095466	3	0.3	1.3	0.378512	3
CADH2_HUMAN	Cadherin-2	CDH2	0	1	0	0.4	0	1.6	0.366508	0.633492	0.223607	1	0.235702	1	0.633492	0	0.198259	0.633492	-0.557086	-0.3	0.4	-1.32193	-0.428571
EPCR_HUMAN	Endothelial protein C receptor	PROCR	0	1	0	1	0	1.5	0	1	0	1	0	1	1	0	0	1	0	0	1	0	0
MIF_HUMAN	Macrophage migration inhibitory factor	MIF	1	0	1	0	0.4	0	0	1	0	1	0	1	1	0	0	1	0	0	1	0	0
CYTB_HUMAN	Cystatin-B	CSTB	0	1	0	1.2	0	0	-0.090167	0.909833	-0.223607	1	-0.235702	1	0.909833	0	0.0410383	0.909833	0.128037	0.1	1.2	0.263034	0.0909091
CD97_HUMAN	CD97 antigen	CD97	0	0	0	0	0	0												0
KLD10_HUMAN	Kelch domain-containing protein 10	KLHDC10	1	0	0.7	0	1.3	0	0.171219	0.828781	0.223607	1	0.235702	1	0.828781	0	0.0815602	0.828781	-0.24577	-0.15	0.7	-0.514573	-0.176471
H15_HUMAN	Histone H1.5	HIST1H1B	0	1	0	1.1	0	1.8	-0.0475114	0.952489	-0.223607	1	-0.235702	1	0.952489	0	0.0211402	0.952489	0.0672673	0.05	1.1	0.137504	0.047619
AMY1_HUMAN (+2)	Alpha-amylase 1	AMY1A	0	1	0	1.1	0	1	-0.0475114	0.952489	-0.223607	1	-0.235702	1	0.952489	0	0.0211402	0.952489	0.0672673	0.05	1.1	0.137504	0.047619
DEN5B_HUMAN	DENN domain-containing protein 5B	DENND5B	0	0	0	0	0	0												0
RNAS2_HUMAN	Non-secretory ribonuclease	RNASE2	1	0	0.8	0	0.9	0	0.109764	0.890236	0.223607	1	0.235702	1	0.890236	0	0.050495	0.890236	-0.156174	-0.1	0.8	-0.321928	-0.111111
GSH1_HUMAN	Glutamate--cysteine ligase catalytic subunit	GCLC	1	0	0.7	0	1.3	0	0.171219	0.828781	0.223607	1	0.235702	1	0.828781	0	0.0815602	0.828781	-0.24577	-0.15	0.7	-0.514573	-0.176471
HNRH2_HUMAN	Heterogeneous nuclear ribonucleoprotein H2	HNRNPH2	1	0	0.6	0	0.6	0	0.235702	0.764298	0.223607	1	0.235702	1	0.764298	0	0.116737	0.764298	-0.342997	-0.2	0.6	-0.736966	-0.25
PSA6_HUMAN	Proteasome subunit alpha type-6	PSMA6	0	1	0	0.9	0	1.6	0.0524864	0.947514	0.223607	1	0.235702	1	0.947514	0	0.0234145	0.947514	-0.0743294	-0.05	0.9	-0.152003	-0.0526316
BFSP1_HUMAN	Filensin	BFSP1	1	0	0.8	0	1.3	0	0.109764	0.890236	0.223607	1	0.235702	1	0.890236	0	0.050495	0.890236	-0.156174	-0.1	0.8	-0.321928	-0.111111
GSHR_HUMAN	Glutathione reductase, mitochondrial	GSR	0	1	0	1.6	0	2.8	-0.219382	0.780618	-0.223607	1	-0.235702	1	0.780618	0	0.107561	0.780618	0.317999	0.3	1.6	0.678072	0.230769
PTMA_HUMAN	Prothymosin alpha	PTMA	1	0	0.9	0	0	0	0.0524864	0.947514	0.223607	1	0.235702	1	0.947514	0	0.0234145	0.947514	-0.0743294	-0.05	0.9	-0.152003	-0.0526316
QSOX2_HUMAN	Sulfhydryl oxidase 2	QSOX2	1	0	0.7	0	1.3	0	0.171219	0.828781	0.223607	1	0.235702	1	0.828781	0	0.0815602	0.828781	-0.24577	-0.15	0.7	-0.514573	-0.176471
I11RA_HUMAN	Interleukin-11 receptor subunit alpha	IL11RA	1	0	0.3	0	1.9	0	0.428393	0.571607	0.223607	1	0.235702	1	0.571607	0	0.242902	0.571607	-0.670478	-0.35	0.3	-1.73697	-0.538462
TRPV6_HUMAN	Transient receptor potential cation channel subfamily V member 6	TRPV6	1	0	1	0	1	0	0	1	0	1	0	1	1	0	0	1	0	0	1	0	0
FHR3_HUMAN	Complement factor H-related protein 3	CFHR3	0	1	0	2.1	0	2.8	-0.317146	0.682854	-0.223607	1	-0.235702	1	0.682854	0	0.165672	0.682854	0.472927	0.55	2.1	1.07039	0.354839
LYAM3_HUMAN	P-selectin	SELP	0	1	0	0.6	0	0.9	0.235702	0.764298	0.223607	1	0.235702	1	0.764298	0	0.116737	0.764298	-0.342997	-0.2	0.6	-0.736966	-0.25
GMFG_HUMAN	Glia maturation factor gamma	GMFG	1	0	0.4	0	0.8	0	0.366508	0.633492	0.223607	1	0.235702	1	0.633492	0	0.198259	0.633492	-0.557086	-0.3	0.4	-1.32193	-0.428571
MGAT1_HUMAN	Alpha-1,3-mannosyl-glycoprotein 2-beta-N-acetylglucosaminyltransferase	MGAT1	0	0	0	0	0	0												0
ANGL3_HUMAN	Angiopoietin-related protein 3	ANGPTL3	0	1	0	0.9	0	0.7	0.0524864	0.947514	0.223607	1	0.235702	1	0.947514	0	0.0234145	0.947514	-0.0743294	-0.05	0.9	-0.152003	-0.0526316
IBP7_HUMAN	Insulin-like growth factor-binding protein 7	IGFBP7	1	0	1.2	0	0	0	-0.090167	0.909833	-0.223607	1	-0.235702	1	0.909833	0	0.0410383	0.909833	0.128037	0.1	1.2	0.263034	0.0909091
PON3_HUMAN	Serum paraoxonase/lactonase 3	PON3	1	0	0.8	0	1.8	0	0.109764	0.890236	0.223607	1	0.235702	1	0.890236	0	0.050495	0.890236	-0.156174	-0.1	0.8	-0.321928	-0.111111
RANG_HUMAN	Ran-specific GTPase-activating protein	RANBP1	0	1	0	0.9	0	0.8	0.0524864	0.947514	0.223607	1	0.235702	1	0.947514	0	0.0234145	0.947514	-0.0743294	-0.05	0.9	-0.152003	-0.0526316
TFPI1_HUMAN	Tissue factor pathway inhibitor	TFPI	1	0	1.1	0	0.8	0	-0.0475114	0.952489	-0.223607	1	-0.235702	1	0.952489	0	0.0211402	0.952489	0.0672673	0.05	1.1	0.137504	0.047619
FRIL_HUMAN	Ferritin light chain	FTL	0	0	0	0	0	0												0
ATL2_HUMAN	ADAMTS-like protein 2	ADAMTSL2	1	0	1	0	0	0	0	1	0	1	0	1	1	0	0	1	0	0	1	0	0
ASGR2_HUMAN	Asialoglycoprotein receptor 2	ASGR2	1	0	1	0	1.6	0	0	1	0	1	0	1	1	0	0	1	0	0	1	0	0
DUT_HUMAN	Deoxyuridine 5'-triphosphate nucleotidohydrolase, mitochondrial	DUT	1	0	0	0	0	0	0.57735	0.42265	0.57735	1	0.57735	1	0.42265	0	0.374019	0.42265	-1	-0.5	0	65535	-1
CR2_HUMAN	Complement receptor type 2	CR2	1	0	0.6	0	0.4	0	0.235702	0.764298	0.223607	1	0.235702	1	0.764298	0	0.116737	0.764298	-0.342997	-0.2	0.6	-0.736966	-0.25
FA7_HUMAN	Coagulation factor VII	F7	0	1	0	0.4	0	1	0.366508	0.633492	0.223607	1	0.235702	1	0.633492	0	0.198259	0.633492	-0.557086	-0.3	0.4	-1.32193	-0.428571

## Sheet: 1 vs 3
Accession Number	ProteinName	GeneName	A1	B1	A2	B2	A3	B3	Pearson Coefficient	PC-pValue	Kendall Coefficient	KC-pValue	Spearman Coefficient	SC-pValue	T-test p Value	T-test Hypothesis	-Log(p value)	Anova p	SAM	Average Diff	Average Ratio	Log2(Average Ratio)	SNR
APOB_HUMAN	Apolipoprotein B-100	APOB	1.1	0.9	1.1	1	1.4	1.2	-0.83205	0.16795	-0.816497	0.333333	-0.894427	0.333333	0.16795	0	0.774821	0.16795	2.12132	0.3	1.3	0.378512	1.5
CO4B_HUMAN	Complement C4-B	C4B	0.9	1	1	0.9	1	1	-0.57735	0.42265	-0.57735	1	-0.57735	1	0.42265	0	0.374019	0.42265	1	0.05	1.05263	0.0740006	1
CERU_HUMAN	Ceruloplasmin	CP	0.9	0.9	1.2	1	0.9	0.8	0.57735	0.42265	0.57735	1	0.57735	1	0.42265	0	0.374019	0.42265	-1	-0.05	0.944444	-0.0824622	-1
AACT_HUMAN	Alpha-1-antichymotrypsin	SERPINA3	1	1	1.8	1.4	1.5	1.4	-0.987878	0.0121217	-0.894427	0.333333	-0.942809	0.333333	0.0121217	0	1.91644	0.0121217	9	0.45	1.45	0.536053	9
CFAH_HUMAN	Complement factor H	CFH	0.9	0.9	0.9	1	1	0.9	-0.57735	0.42265	-0.57735	1	-0.57735	1	0.42265	0	0.374019	0.42265	1	0.05	1.05556	0.0780025	1
ITIH4_HUMAN	Inter-alpha-trypsin inhibitor heavy chain H4	ITIH4	0.8	1.1	1.4	2	1.8	2	-0.965824	0.0341757	-0.816497	0.333333	-0.894427	0.333333	0.0341757	0	1.46628	0.0341757	5.26965	0.95	2	1	3.8
HEMO_HUMAN	Hemopexin	HPX	1.1	1	1.1	1	1.3	1	-0.408248	0.591752	-0.223607	1	-0.235702	1	0.591752	0	0.22786	0.591752	0.632456	0.1	1.09524	0.131245	0.5
ITIH1_HUMAN	Inter-alpha-trypsin inhibitor heavy chain H1	ITIH1	0.8	1	0.9	0.9	0.8	0.8	0.57735	0.42265	0.57735	1	0.57735	1	0.42265	0	0.374019	0.42265	-1	-0.1	0.888889	-0.169925	-1
VTDB_HUMAN	Vitamin D-binding protein	GC	0.9	0.9	0.9	0.8	0.8	0.7	0.904534	0.095466	0.894427	0.333333	0.942809	0.333333	0.095466	0	1.02015	0.095466	-3	-0.15	0.833333	-0.263034	-3
CFAB_HUMAN	Complement factor B	CFB	0.9	0.9	1.1	1.1	1.3	1.1	-0.904534	0.095466	-0.894427	0.333333	-0.942809	0.333333	0.095466	0	1.02015	0.095466	3	0.3	1.33333	0.415037	3
ITIH2_HUMAN	Inter-alpha-trypsin inhibitor heavy chain H2	ITIH2	0.9	0.9	0.9	0.8	0.8	0.8	1	0	1	0.333333	1	0.333333	0	1	65535	0	65535	-0.1	0.888889	-0.169925	65535
ANT3_HUMAN	Antithrombin-III	SERPINC1	0.9	0.8	0.8	0.6	0.7	0.5	0.845154	0.154846	0.816497	0.333333	0.894427	0.333333	0.154846	0	0.810101	0.154846	-2.23607	-0.25	0.705882	-0.5025	-1.66667
FETUA_HUMAN	Alpha-2-HS-glycoprotein	AHSG	1.1	0.8	0.7	0.6	0.5	0.4	0.912871	0.0871291	0.816497	0.333333	0.894427	0.333333	0.0871291	0	1.05984	0.0871291	-3.16228	-0.5	0.473684	-1.078	-2.5
KNG1_HUMAN	Kininogen-1	KNG1	0.9	1.1	0.9	1	0.9	1	0.301511	0.698489	0.223607	1	0.235702	1	0.698489	0	0.155841	0.698489	-0.447214	-0.05	0.95	-0.0740006	-0.333333
A1BG_HUMAN	Alpha-1B-glycoprotein	A1BG	1.1	1.1	1.2	1.1	1.3	1.3	-1	0	-1	0.333333	-1	0.333333	0	1	65535	0	65535	0.2	1.18182	0.241008	65535
CO3_HUMAN	Complement C3	C3	1	0.9	2.2	2.2	1.9	1.9	-0.997241	0.00275863	-0.894427	0.333333	-0.942809	0.333333	0.00275863	1	2.55931	0.00275863	19	0.95	2	1	19
FINC_HUMAN	Fibronectin	FN1	0.6	0.6	1.7	2.5	1.4	1.8	-0.96225	0.0377496	-0.894427	0.333333	-0.942809	0.333333	0.0377496	0	1.42309	0.0377496	5	1	2.66667	1.41504	5
APOA4_HUMAN	Apolipoprotein A-IV	APOA4	1.1	1.1	0.6	0.6	0.6	0.6	1	0	1	0.333333	1	0.333333	0	1	65535	0	65535	-0.5	0.545455	-0.874469	65535
APOH_HUMAN	Beta-2-glycoprotein 1	APOH	0.9	1	0.9	0.8	1.1	1	-0.707107	0.292893	-0.67082	0.666667	-0.707107	0.666667	0.292893	0	0.533291	0.292893	1.41421	0.1	1.10526	0.14439	1
PLMN_HUMAN	Plasminogen	PLG	0.9	0.9	0.8	0.9	1	1	-1	0	-1	0.333333	-1	0.333333	0	1	65535	0	65535	0.1	1.11111	0.152003	65535
ZA2G_HUMAN	Zinc-alpha-2-glycoprotein	AZGP1	1.1	1.1	1.3	1.2	1.8	1.8	-1	0	-1	0.333333	-1	0.333333	0	1	65535	0	65535	0.7	1.63636	0.710493	65535
THRB_HUMAN	Prothrombin	F2	0.9	0.9	0.7	0.7	1	0.8	0	1	0	1	0	1	1	0	0	1	0	0	1	0	0
ITIH3_HUMAN	Inter-alpha-trypsin inhibitor heavy chain H3	ITIH3	0.9	0.9	1.3	1.2	1.1	1.1	-1	0	-1	0.333333	-1	0.333333	0	1	65535	0	65535	0.2	1.22222	0.289507	65535
VTNC_HUMAN	Vitronectin	VTN	0.9	0.9	1	1	1.1	0.9	-0.57735	0.42265	-0.57735	1	-0.57735	1	0.42265	0	0.374019	0.42265	1	0.1	1.11111	0.152003	1
CLUS_HUMAN	Clusterin	CLU	1	0.9	1	1	1	0.9	0	1	0	1	0	1	1	0	0	1	0	0	1	0	0
CFAI_HUMAN	Complement factor I	CFI	0.9	0.8	1	0.9	1.1	0.9	-0.688247	0.311753	-0.67082	0.666667	-0.707107	0.666667	0.311753	0	0.50619	0.311753	1.34164	0.15	1.17647	0.234465	1
CO5_HUMAN	Complement C5	C5	1	1	1.1	1	1.2	1.1	-0.904534	0.095466	-0.894427	0.333333	-0.942809	0.333333	0.095466	0	1.02015	0.095466	3	0.15	1.15	0.201634	3
C1S_HUMAN	Complement C1s subcomponent	C1S	0.8	0.7	0.9	0.9	0.8	0.9	-0.707107	0.292893	-0.67082	0.666667	-0.707107	0.666667	0.292893	0	0.533291	0.292893	1.41421	0.1	1.13333	0.180572	1
ANGT_HUMAN	Angiotensinogen	AGT	0.9	0.9	0.9	0.9	1.2	1.2	-1	0	-1	0.333333	-1	0.333333	0	1	65535	0	65535	0.3	1.33333	0.415037	65535
APOE_HUMAN	Apolipoprotein E	APOE	0.8	0.9	0.8	0.9	1	1.2	-0.845154	0.154846	-0.816497	0.333333	-0.894427	0.333333	0.154846	0	0.810101	0.154846	2.23607	0.25	1.29412	0.371969	1.66667
CO9_HUMAN	Complement component C9	C9	0.9	1.1	1.7	1.8	1.4	1.5	-0.943456	0.0565436	-0.816497	0.333333	-0.894427	0.333333	0.0565436	0	1.24762	0.0565436	4.02492	0.45	1.45	0.536053	3
CO7_HUMAN	Complement component C7	C7	0.9	0.9	0.7	0.8	1.1	1	-0.904534	0.095466	-0.894427	0.333333	-0.942809	0.333333	0.095466	0	1.02015	0.095466	3	0.15	1.16667	0.222392	3
AFAM_HUMAN	Afamin	AFM	1	1	0.7	0.9	0.9	0.9	1	0	1	0.333333	1	0.333333	0	1	65535	0	65535	-0.1	0.9	-0.152003	65535
HRG_HUMAN	Histidine-rich glycoprotein	HRG	0.9	0.9	1.1	1.3	0.7	0.6	0.96225	0.0377496	0.894427	0.333333	0.942809	0.333333	0.0377496	0	1.42309	0.0377496	-5	-0.25	0.722222	-0.469485	-5
AMBP_HUMAN	Protein AMBP	AMBP	1	1	1.1	1.1	1.4	1.3	-0.980196	0.0198039	-0.894427	0.333333	-0.942809	0.333333	0.0198039	0	1.70325	0.0198039	7	0.35	1.35	0.432959	7
LUM_HUMAN	Lumican	LUM	0.9	0.9	0.4	0.5	0.4	0.4	1	0	1	0.333333	1	0.333333	0	1	65535	0	65535	-0.5	0.444444	-1.16993	65535
C1R_HUMAN	Complement C1r subcomponent	C1R	0.8	0.9	0.9	0.9	0.9	1	-0.707107	0.292893	-0.67082	0.666667	-0.707107	0.666667	0.292893	0	0.533291	0.292893	1.41421	0.1	1.11765	0.160465	1
RET4_HUMAN	Retinol-binding protein 4	RBP4	1.1	0.9	0.8	0.7	0.9	0.8	0.688247	0.311753	0.67082	0.666667	0.707107	0.666667	0.311753	0	0.50619	0.311753	-1.34164	-0.15	0.85	-0.234465	-1
CO6_HUMAN	Complement component C6	C6	0.9	0.9	0.8	0.8	0.9	0.8	0.57735	0.42265	0.57735	1	0.57735	1	0.42265	0	0.374019	0.42265	-1	-0.05	0.944444	-0.0824622	-1
CXCL7_HUMAN	Platelet basic protein	PPBP	1.1	1.1	0.8	0.8	0.8	1.1	0.57735	0.42265	0.57735	1	0.57735	1	0.42265	0	0.374019	0.42265	-1	-0.15	0.863636	-0.211504	-1
GELS_HUMAN	Gelsolin	GSN	0.8	1	0.6	0.5	0.5	0.5	0.942809	0.057191	0.894427	0.333333	0.942809	0.333333	0.057191	0	1.24267	0.057191	-4	-0.4	0.555556	-0.847997	-4
A2GL_HUMAN	Leucine-rich alpha-2-glycoprotein	LRG1	1.1	0.9	1.4	1.6	1.9	2.1	-0.980581	0.0194193	-0.816497	0.333333	-0.894427	0.333333	0.0194193	0	1.71177	0.0194193	7.07107	1	2	1	5
CPN2_HUMAN	Carboxypeptidase N subunit 2	CPN2	0.8	0.9	0.9	1.1	1.1	1.2	-0.948683	0.0513167	-0.816497	0.333333	-0.894427	0.333333	0.0513167	0	1.28974	0.0513167	4.24264	0.3	1.35294	0.436099	3
CO8A_HUMAN	Complement component C8 alpha chain	C8A	1	1	1	1	1	1												0	1	0
PLSL_HUMAN	Plastin-2	LCP1	0.7	0.9	2.2	2	1.2	1.3	-0.943456	0.0565436	-0.816497	0.333333	-0.894427	0.333333	0.0565436	0	1.24762	0.0565436	4.02492	0.45	1.5625	0.643856	3
CO8G_HUMAN	Complement component C8 gamma chain	C8G	0.7	0.7	1.2	0.9	1	0.7	-0.57735	0.42265	-0.57735	1	-0.57735	1	0.42265	0	0.374019	0.42265	1	0.15	1.21429	0.280108	1
FIBA_HUMAN	Fibrinogen alpha chain	FGA	1	0.9	0.6	0.5	0.6	0.6	0.980196	0.0198039	0.894427	0.333333	0.942809	0.333333	0.0198039	0	1.70325	0.0198039	-7	-0.35	0.631579	-0.662965	-7
CO2_HUMAN	Complement C2	C2	1	1.1	1.1	1.1	1.2	1.2	-0.904534	0.095466	-0.894427	0.333333	-0.942809	0.333333	0.095466	0	1.02015	0.095466	3	0.15	1.14286	0.192645	3
CO8B_HUMAN	Complement component C8 beta chain	C8B	0.8	0.9	1.2	0.8	1.3	0.9	-0.650945	0.349055	-0.67082	0.666667	-0.707107	0.666667	0.349055	0	0.457106	0.349055	1.21268	0.25	1.29412	0.371969	1
APOA2_HUMAN	Apolipoprotein A-II	APOA2	0.8	0.9	2.7	3	3.5	3.7	-0.998351	0.00164881	-0.816497	0.333333	-0.894427	0.333333	0.00164881	1	2.78283	0.00164881	24.5967	2.75	4.23529	2.08246	18.3333
IC1_HUMAN	Plasma protease C1 inhibitor	SERPING1	0.9	0.9	2	1.9	1.8	1.8	-1	0	-1	0.333333	-1	0.333333	0	1	65535	0	65535	0.9	2	1	65535
VWF_HUMAN	von Willebrand factor	VWF	0.6	0.8	1.5	1.2	1.7	1.4	-0.957841	0.0421585	-0.816497	0.333333	-0.894427	0.333333	0.0421585	0	1.37511	0.0421585	4.71495	0.85	2.21429	1.14684	3.4
KAIN_HUMAN	Kallistatin	SERPINA4	0.9	0.9	0.6	0.8	0.9	1	-0.57735	0.42265	-0.57735	1	-0.57735	1	0.42265	0	0.374019	0.42265	1	0.05	1.05556	0.0780025	1
PEDF_HUMAN	Pigment epithelium-derived factor	SERPINF1	1	0.9	0.9	0.9	1	0.8	0.301511	0.698489	0.223607	1	0.235702	1	0.698489	0	0.155841	0.698489	-0.447214	-0.05	0.947368	-0.0780025	-0.333333
ACTG_HUMAN	Actin, cytoplasmic 2	ACTG1	0.9	1	1.2	1.2	1.2	1.2	-0.96225	0.0377496	-0.894427	0.333333	-0.942809	0.333333	0.0377496	0	1.42309	0.0377496	5	0.25	1.26316	0.337035	5
CRP_HUMAN	C-reactive protein	CRP	0	0	0	0	0	0												0
HEP2_HUMAN	Heparin cofactor 2	SERPIND1	1	1	1	1	0.8	0.8	1	0	1	0.333333	1	0.333333	0	1	65535	0	65535	-0.2	0.8	-0.321928	65535
A2AP_HUMAN	Alpha-2-antiplasmin	SERPINF2	1	1	0.8	0.7	0.9	0.9	1	0	1	0.333333	1	0.333333	0	1	65535	0	65535	-0.1	0.9	-0.152003	65535
TETN_HUMAN	Tetranectin	CLEC3B	1	1.1	0.6	0.7	0.7	0.7	0.980196	0.0198039	0.894427	0.333333	0.942809	0.333333	0.0198039	0	1.70325	0.0198039	-7	-0.35	0.666667	-0.584963	-7
PGRP2_HUMAN	N-acetylmuramoyl-L-alanine amidase	PGLYRP2	1	1	0.7	0.7	0.7	0.7	1	0	1	0.333333	1	0.333333	0	1	65535	0	65535	-0.3	0.7	-0.514573	65535
FA5_HUMAN	Coagulation factor V	F5	0.9	1.1	1	1.3	1.1	1.1	-0.57735	0.42265	-0.57735	1	-0.57735	1	0.42265	0	0.374019	0.42265	1	0.1	1.1	0.137504	1
THBG_HUMAN	Thyroxine-binding globulin	SERPINA7	1	1	0.8	0.8	0.7	0.7	1	0	1	0.333333	1	0.333333	0	1	65535	0	65535	-0.3	0.7	-0.514573	65535
TSP1_HUMAN	Thrombospondin-1	THBS1	1	1	0.7	0.7	0.8	0.9	0.904534	0.095466	0.894427	0.333333	0.942809	0.333333	0.095466	0	1.02015	0.095466	-3	-0.15	0.85	-0.234465	-3
KLKB1_HUMAN	Plasma kallikrein	KLKB1	1	0.9	0.8	0.8	0.9	0.9	0.57735	0.42265	0.57735	1	0.57735	1	0.42265	0	0.374019	0.42265	-1	-0.05	0.947368	-0.0780025	-1
ALBU_HUMAN	Serum albumin	ALB	1	0.9	0.7	0.8	1.1	1.2	-0.894427	0.105573	-0.816497	0.333333	-0.894427	0.333333	0.105573	0	0.976448	0.105573	2.82843	0.2	1.21053	0.275634	2
ALS_HUMAN	Insulin-like growth factor-binding protein complex acid labile subunit	IGFALS	1	1.1	0.8	0.9	0.9	1	0.707107	0.292893	0.67082	0.666667	0.707107	0.666667	0.292893	0	0.533291	0.292893	-1.41421	-0.1	0.904762	-0.14439	-1
TPM4_HUMAN	Tropomyosin alpha-4 chain	TPM4	1.1	1.1	1.1	1	1.4	1.3	-0.96225	0.0377496	-0.894427	0.333333	-0.942809	0.333333	0.0377496	0	1.42309	0.0377496	5	0.25	1.22727	0.295456	5
CBG_HUMAN	Corticosteroid-binding globulin	SERPINA6	1	1	1	1	1.1	1.1	-1	0	-1	0.333333	-1	0.333333	0	1	65535	0	65535	0.1	1.1	0.137504	65535
C1QB_HUMAN	Complement C1q subcomponent subunit B	C1QB	1.1	1.2	0.9	1.1	1.1	1.3	-0.301511	0.698489	-0.223607	1	-0.235702	1	0.698489	0	0.155841	0.698489	0.447214	0.05	1.04348	0.0614005	0.333333
ECM1_HUMAN	Extracellular matrix protein 1	ECM1	1.1	1	0.9	0.8	1	0.8	0.688247	0.311753	0.67082	0.666667	0.707107	0.666667	0.311753	0	0.50619	0.311753	-1.34164	-0.15	0.857143	-0.222392	-1
MOES_HUMAN	Moesin	MSN	1	1	1.4	2.2	1.6	1.9	-0.96225	0.0377496	-0.894427	0.333333	-0.942809	0.333333	0.0377496	0	1.42309	0.0377496	5	0.75	1.75	0.807355	5
APOL1_HUMAN	Apolipoprotein L1	APOL1	0.8	0.9	1.2	2.1	1.7	3.1	-0.842155	0.157845	-0.816497	0.333333	-0.894427	0.333333	0.157845	0	0.801769	0.157845	2.20866	1.55	2.82353	1.4975	2.06667
PROS_HUMAN	Vitamin K-dependent protein S	PROS1	1	0.9	0.8	0.9	0.8	0.8	0.904534	0.095466	0.894427	0.333333	0.942809	0.333333	0.095466	0	1.02015	0.095466	-3	-0.15	0.842105	-0.247928	-3
S10A9_HUMAN	Protein S100-A9	S100A9	0	0	0	0	0	0												0
VCAM1_HUMAN	Vascular cell adhesion protein 1	VCAM1	1.1	1	0.9	1	1.1	0.9	0.301511	0.698489	0.223607	1	0.235702	1	0.698489	0	0.155841	0.698489	-0.447214	-0.05	0.952381	-0.0703893	-0.333333
GPX3_HUMAN	Glutathione peroxidase 3	GPX3	1	1	0.9	0.8	1.1	1.1	-1	0	-1	0.333333	-1	0.333333	0	1	65535	0	65535	0.1	1.1	0.137504	65535
SHBG_HUMAN	Sex hormone-binding globulin	SHBG	1	1	0.7	0.6	0.6	0.6	1	0	1	0.333333	1	0.333333	0	1	65535	0	65535	-0.4	0.6	-0.736966	65535
CBPN_HUMAN	Carboxypeptidase N catalytic chain	CPN1	1.1	1.1	1	1.2	1	1.3	-0.229416	0.770584	0	1	0	1	0.770584	0	0.11318	0.770584	0.333333	0.05	1.04545	0.0641303	0.333333
APOC3_HUMAN	Apolipoprotein C-III	APOC3	1.1	1	1.7	1.7	1.5	1.6	-0.980581	0.0194193	-0.816497	0.333333	-0.894427	0.333333	0.0194193	0	1.71177	0.0194193	7.07107	0.5	1.47619	0.561879	5
PERM_HUMAN	Myeloperoxidase	MPO	0.9	0.8	1.5	1.8	2	2	-0.998115	0.00188502	-0.894427	0.333333	-0.942809	0.333333	0.00188502	1	2.72469	0.00188502	23	1.15	2.35294	1.23447	23
CO6A3_HUMAN	Collagen alpha-3(VI) chain	COL6A3	1.1	1	0.9	0.8	1	0.9	0.707107	0.292893	0.67082	0.666667	0.707107	0.666667	0.292893	0	0.533291	0.292893	-1.41421	-0.1	0.904762	-0.14439	-1
TAGL2_HUMAN	Transgelin-2	TAGLN2	0.9	0.9	0.8	0.8	1.2	1	-0.816497	0.183503	-0.894427	0.333333	-0.942809	0.333333	0.183503	0	0.736356	0.183503	2	0.2	1.22222	0.289507	2
C1QR1_HUMAN	Complement component C1q receptor	CD93	1	0	0.6	0	0.6	0	0.235702	0.764298	0.223607	1	0.235702	1	0.764298	0	0.116737	0.764298	-0.342997	-0.2	0.6	-0.736966	-0.25
F13B_HUMAN	Coagulation factor XIII B chain	F13B	0.9	1	0.8	0.8	1	1	-0.57735	0.42265	-0.57735	1	-0.57735	1	0.42265	0	0.374019	0.42265	1	0.05	1.05263	0.0740006	1
FA12_HUMAN	Coagulation factor XII	F12	1	1	0.6	0.5	0.8	0.8	1	0	1	0.333333	1	0.333333	0	1	65535	0	65535	-0.2	0.8	-0.321928	65535
HGFA_HUMAN	Hepatocyte growth factor activator	HGFAC	1	1	0.9	0.8	0.9	0.8	0.904534	0.095466	0.894427	0.333333	0.942809	0.333333	0.095466	0	1.02015	0.095466	-3	-0.15	0.85	-0.234465	-3
PPIA_HUMAN	Peptidyl-prolyl cis-trans isomerase A	PPIA	1	1	1.3	1.3	1.6	1.5	-0.991837	0.0081634	-0.894427	0.333333	-0.942809	0.333333	0.0081634	1	2.08813	0.0081634	11	0.55	1.55	0.632268	11
CADH5_HUMAN	Cadherin-5	CDH5	1	1	0.7	0.7	0.7	0.8	0.96225	0.0377496	0.894427	0.333333	0.942809	0.333333	0.0377496	0	1.42309	0.0377496	-5	-0.25	0.75	-0.415037	-5
CNDP1_HUMAN	Beta-Ala-His dipeptidase	CNDP1	1.2	1	1.1	1.1	1.3	1.2	-0.688247	0.311753	-0.67082	0.666667	-0.707107	0.666667	0.311753	0	0.50619	0.311753	1.34164	0.15	1.13636	0.184425	1
PON1_HUMAN	Serum paraoxonase/arylesterase 1	PON1	0.9	0.8	1.4	1	2.8	2.1	-0.95448	0.04552	-0.816497	0.333333	-0.894427	0.333333	0.04552	0	1.3418	0.04552	4.52548	1.6	2.88235	1.52725	4
PROF1_HUMAN	Profilin-1	PFN1	0.9	0.8	1.1	1.2	1.3	1.2	-0.970143	0.0298575	-0.816497	0.333333	-0.894427	0.333333	0.0298575	0	1.52495	0.0298575	5.65685	0.4	1.47059	0.556393	4
LYAM1_HUMAN	L-selectin	SELL	1	1	0.9	0.8	0.9	0.8	0.904534	0.095466	0.894427	0.333333	0.942809	0.333333	0.095466	0	1.02015	0.095466	-3	-0.15	0.85	-0.234465	-3
C1QA_HUMAN	Complement C1q subcomponent subunit A	C1QA	0.8	0.9	0.7	1.2	0.6	0.9	0.408248	0.591752	0.223607	1	0.235702	1	0.591752	0	0.22786	0.591752	-0.632456	-0.1	0.882353	-0.180572	-0.5
TENX_HUMAN	Tenascin-X	TNXB	0.9	0.9	0.6	0.7	0.7	0.9	0.57735	0.42265	0.57735	1	0.57735	1	0.42265	0	0.374019	0.42265	-1	-0.1	0.888889	-0.169925	-1
APOC2_HUMAN	Apolipoprotein C-II	APOC2	1	1	1.6	1.5	1.2	1.1	-0.904534	0.095466	-0.894427	0.333333	-0.942809	0.333333	0.095466	0	1.02015	0.095466	3	0.15	1.15	0.201634	3
VINC_HUMAN	Vinculin	VCL	0.8	0.8	1	0.7	1	1.1	-0.96225	0.0377496	-0.894427	0.333333	-0.942809	0.333333	0.0377496	0	1.42309	0.0377496	5	0.25	1.3125	0.392317	5
BTD_HUMAN	Biotinidase	BTD	0.9	1	0.6	0.7	0.7	0.9	0.688247	0.311753	0.67082	0.666667	0.707107	0.666667	0.311753	0	0.50619	0.311753	-1.34164	-0.15	0.842105	-0.247928	-1
CYTC_HUMAN	Cystatin-C	CST3	1	1	0.8	0.7	1	1.1	-0.57735	0.42265	-0.57735	1	-0.57735	1	0.42265	0	0.374019	0.42265	1	0.05	1.05	0.0703893	1
IBP3_HUMAN	Insulin-like growth factor-binding protein 3	IGFBP3	1	1	0.9	0.9	1.2	1.1	-0.904534	0.095466	-0.894427	0.333333	-0.942809	0.333333	0.095466	0	1.02015	0.095466	3	0.15	1.15	0.201634	3
FLNA_HUMAN	Filamin-A	FLNA	1	1	1	0.9	1.5	1.2	-0.855186	0.144814	-0.894427	0.333333	-0.942809	0.333333	0.144814	0	0.83919	0.144814	2.33333	0.35	1.35	0.432959	2.33333
SEPP1_HUMAN	Selenoprotein P	SEPP1	1	1	0.6	0.7	1	1.2	-0.57735	0.42265	-0.57735	1	-0.57735	1	0.42265	0	0.374019	0.42265	1	0.1	1.1	0.137504	1
FIBB_HUMAN	Fibrinogen beta chain	FGB	1	0.9	0.5	0.3	0.6	0.5	0.970143	0.0298575	0.816497	0.333333	0.894427	0.333333	0.0298575	0	1.52495	0.0298575	-5.65685	-0.4	0.578947	-0.788496	-4
ZPI_HUMAN	Protein Z-dependent protease inhibitor	SERPINA10	1.1	0.9	1.2	0.9	1.1	0.9	0	1	0	1	0	1	1	0	0	1	0	0	1	0	0
CHLE_HUMAN	Cholinesterase	BCHE	1.1	1	0.7	0.6	0.7	0.7	0.980196	0.0198039	0.894427	0.333333	0.942809	0.333333	0.0198039	0	1.70325	0.0198039	-7	-0.35	0.666667	-0.584963	-7
MASP1_HUMAN	Mannan-binding lectin serine protease 1	MASP1	1.1	1.1	1	0.8	1.3	0.9	1.96262e-16	1	0	1	0	1	1	0	0	1	0	0	1	0	0
FA10_HUMAN	Coagulation factor X	F10	1	1	0.8	0.8	1	0.8	0.57735	0.42265	0.57735	1	0.57735	1	0.42265	0	0.374019	0.42265	-1	-0.1	0.9	-0.152003	-1
CBPB2_HUMAN	Carboxypeptidase B2	CPB2	1	1	1.1	1.2	1.1	0.9	-3.92523e-16	1	0	1	0	1	1	0	0	1	0	0	1	0	0
SAA1_HUMAN	Serum amyloid A-1 protein	SAA1	2.1	2	4.4	3.8	4.1	5.8	-0.923548	0.0764519	-0.816497	0.333333	-0.894427	0.333333	0.0764519	0	1.11661	0.0764519	3.40588	2.9	2.41463	1.2718	3.22222
SAMP_HUMAN	Serum amyloid P-component	APCS	1	1	1.5	1.7	1.5	1.7	-0.973329	0.0266715	-0.894427	0.333333	-0.942809	0.333333	0.0266715	0	1.57395	0.0266715	6	0.6	1.6	0.678072	6
HGFL_HUMAN	Hepatocyte growth factor-like protein	MST1	1	1	0.8	0.7	1	1												0	1	0
TENA_HUMAN	Tenascin	TNC	0.9	1	0.7	0.9	1	1	-0.57735	0.42265	-0.57735	1	-0.57735	1	0.42265	0	0.374019	0.42265	1	0.05	1.05263	0.0740006	1
APOC1_HUMAN	Apolipoprotein C-I	APOC1	1	1	1.4	1.5	1.3	1.2	-0.96225	0.0377496	-0.894427	0.333333	-0.942809	0.333333	0.0377496	0	1.42309	0.0377496	5	0.25	1.25	0.321928	5
TLN1_HUMAN	Talin-1	TLN1	1	0.9	1.4	1.1	1.5	1.3	-0.943456	0.0565436	-0.816497	0.333333	-0.894427	0.333333	0.0565436	0	1.24762	0.0565436	4.02492	0.45	1.47368	0.559427	3
COMP_HUMAN	Cartilage oligomeric matrix protein	COMP	1.1	1.1	0.5	0.5	0.6	0.4	0.973329	0.0266715	0.894427	0.333333	0.942809	0.333333	0.0266715	0	1.57395	0.0266715	-6	-0.6	0.454545	-1.1375	-6
CD44_HUMAN	CD44 antigen	CD44	1.1	1.1	0.7	1	0.6	1	0.727607	0.272393	0.894427	0.333333	0.942809	0.333333	0.272393	0	0.564804	0.272393	-1.5	-0.3	0.727273	-0.459432	-1.5
CO4A_HUMAN	Complement C4-A	C4A	0.8	0.8	1	1	0.9	0.8	-0.57735	0.42265	-0.57735	1	-0.57735	1	0.42265	0	0.374019	0.42265	1	0.05	1.0625	0.0874628	1
PRG4_HUMAN	Proteoglycan 4	PRG4	0.8	0.9	1	1	1.1	1.6	-0.811107	0.188893	-0.816497	0.333333	-0.894427	0.333333	0.188893	0	0.723784	0.188893	1.96116	0.5	1.58824	0.667425	1.66667
QSOX1_HUMAN	Sulfhydryl oxidase 1	QSOX1	0.9	1	1.2	1.1	1.7	1.3	-0.883541	0.116459	-0.816497	0.333333	-0.894427	0.333333	0.116459	0	0.933828	0.116459	2.66789	0.55	1.57895	0.658963	2.2
PHLD_HUMAN	Phosphatidylinositol-glycan-specific phospholipase D	GPLD1	1	1	0.9	1	1	1												0	1	0
PLF4_HUMAN	Platelet factor 4	PF4	1	1	0.5	0.5	0.5	0.5	1	0	1	0.333333	1	0.333333	0	1	65535	0	65535	-0.5	0.5	-1	65535
LBP_HUMAN	Lipopolysaccharide-binding protein	LBP	0.9	1	2.2	4.8	2.4	4.3	-0.872295	0.127705	-0.816497	0.333333	-0.894427	0.333333	0.127705	0	0.893792	0.127705	2.52282	2.4	3.52632	1.81816	2.4
PI16_HUMAN	Peptidase inhibitor 16	PI16	1.1	1.1	0.3	0.2	0.3	0.2	0.996558	0.00344235	0.894427	0.333333	0.942809	0.333333	0.00344235	1	2.46314	0.00344235	-17	-0.85	0.227273	-2.1375	-17
S10A8_HUMAN	Protein S100-A8	S100A8	1	0.9	4.1	4.5	5.5	5.8	-0.99887	0.00112982	-0.816497	0.333333	-0.894427	0.333333	0.00112982	1	2.94699	0.00112982	29.7254	4.7	5.94737	2.57225	23.5
FA9_HUMAN	Coagulation factor IX	F9	1	1	0.9	1.1	1.2	1.1	-0.904534	0.095466	-0.894427	0.333333	-0.942809	0.333333	0.095466	0	1.02015	0.095466	3	0.15	1.15	0.201634	3
CD14_HUMAN	Monocyte differentiation antigen CD14	CD14	1	1	1.2	0.9	1.5	1.2	-0.855186	0.144814	-0.894427	0.333333	-0.942809	0.333333	0.144814	0	0.83919	0.144814	2.33333	0.35	1.35	0.432959	2.33333
GRP78_HUMAN	78 kDa glucose-regulated protein	HSPA5	1.1	1.1	1	1.1	1.3	1.7	-0.816497	0.183503	-0.894427	0.333333	-0.942809	0.333333	0.183503	0	0.736356	0.183503	2	0.4	1.36364	0.447459	2
FBLN1_HUMAN	Fibulin-1	FBLN1	1.1	1.1	0.8	0.8	0.8	0.6	0.942809	0.057191	0.894427	0.333333	0.942809	0.333333	0.057191	0	1.24267	0.057191	-4	-0.4	0.636364	-0.652077	-4
FHR2_HUMAN	Complement factor H-related protein 2	CFHR2	1	0.9	1.1	1.1	1.1	1.1	-0.904534	0.095466	-0.894427	0.333333	-0.942809	0.333333	0.095466	0	1.02015	0.095466	3	0.15	1.15789	0.211504	3
HS90A_HUMAN	Heat shock protein HSP 90-alpha	HSP90AA1	0.7	0	3.8	8.3	2.6	4.5	-0.912797	0.0872034	-0.816497	0.333333	-0.894427	0.333333	0.0872034	0	1.05947	0.0872034	3.16073	3.2	10.1429	3.34239	2.46154
CATA_HUMAN	Catalase	CAT	1.1	1	1.3	1	1.7	1.4	-0.912871	0.0871291	-0.816497	0.333333	-0.894427	0.333333	0.0871291	0	1.05984	0.0871291	3.16228	0.5	1.47619	0.561879	2.5
FETUB_HUMAN	Fetuin-B	FETUB	0.8	0.8	0.7	0.7	0.8	0.9	-0.57735	0.42265	-0.57735	1	-0.57735	1	0.42265	0	0.374019	0.42265	1	0.05	1.0625	0.0874628	1
HABP2_HUMAN	Hyaluronan-binding protein 2	HABP2	1	1	0.7	0.7	0.9	1	0.57735	0.42265	0.57735	1	0.57735	1	0.42265	0	0.374019	0.42265	-1	-0.05	0.95	-0.0740006	-1
ACTN1_HUMAN	Alpha-actinin-1	ACTN1	0.8	0.6	4.1	7.8	7	8.5	-0.988677	0.0113233	-0.816497	0.333333	-0.894427	0.333333	0.0113233	0	1.94603	0.0113233	9.31754	7.05	11.0714	3.46877	8.29412
ENOA_HUMAN	Alpha-enolase	ENO1	0.9	0.9	1.3	2.2	1.3	3.1	-0.714545	0.285455	-0.894427	0.333333	-0.942809	0.333333	0.285455	0	0.544462	0.285455	1.44444	1.3	2.44444	1.28951	1.44444
MASP2_HUMAN	Mannan-binding lectin serine protease 2	MASP2	1	1	1	1.1	1.2	0.9	-0.229416	0.770584	0	1	0	1	0.770584	0	0.11318	0.770584	0.333333	0.05	1.05	0.0703893	0.333333
PGBM_HUMAN	Basement membrane-specific heparan sulfate proteoglycan core protein	HSPG2	1	1	0.7	0.7	0.9	1.5	-0.426401	0.573599	0	1	0	1	0.573599	0	0.241392	0.573599	0.666667	0.2	1.2	0.263034	0.666667
TRY1_HUMAN	Trypsin-1	PRSS1	1	1	1	1	1.2	1.3	-0.96225	0.0377496	-0.894427	0.333333	-0.942809	0.333333	0.0377496	0	1.42309	0.0377496	5	0.25	1.25	0.321928	5
HYOU1_HUMAN	Hypoxia up-regulated protein 1	HYOU1	0.9	0.9	0.6	1.4	0.7	2	-0.439679	0.560321	0	1	0	1	0.560321	0	0.251563	0.560321	0.692308	0.45	1.5	0.584963	0.692308
FA11_HUMAN	Coagulation factor XI	F11	1	1	0.6	0.6	0.7	0.9	0.816497	0.183503	0.894427	0.333333	0.942809	0.333333	0.183503	0	0.736356	0.183503	-2	-0.2	0.8	-0.321928	-2
BGH3_HUMAN	Transforming growth factor-beta-induced protein ig-h3	TGFBI	1	1.1	0.7	0.9	0.9	1.2	2.48253e-16	1	0	1	0	1	1	0	0	1	0	0	1	0	0
PLTP_HUMAN	Phospholipid transfer protein	PLTP	0.9	1	1	1	1.4	1.2	-0.911322	0.0886776	-0.816497	0.333333	-0.894427	0.333333	0.0886776	0	1.05219	0.0886776	3.1305	0.35	1.36842	0.452512	2.33333
APOF_HUMAN	Apolipoprotein F	APOF	1	0.9	1.1	1.1	1.2	1	-0.688247	0.311753	-0.67082	0.666667	-0.707107	0.666667	0.311753	0	0.50619	0.311753	1.34164	0.15	1.15789	0.211504	1
CFAD_HUMAN	Complement factor D	CFD	0.9	0.8	0.7	0.8	1.2	1.2	-0.980196	0.0198039	-0.894427	0.333333	-0.942809	0.333333	0.0198039	0	1.70325	0.0198039	7	0.35	1.41176	0.4975	7
LDHB_HUMAN	L-lactate dehydrogenase B chain	LDHB	0.9	1	1.7	2.2	1.2	1.5	-0.872872	0.127128	-0.816497	0.333333	-0.894427	0.333333	0.127128	0	0.895757	0.127128	2.52982	0.4	1.42105	0.50696	2
EZRI_HUMAN	Ezrin	EZR	0	0.9	0	2.9	0	2.9	-0.4222	0.5778	-0.223607	1	-0.235702	1	0.5778	0	0.238223	0.5778	0.658665	1	3.22222	1.68806	0.526316
1433Z_HUMAN	14-3-3 protein zeta/delta	YWHAZ	0.4	0.4	1.6	1.6	1.6	1.4	-0.991837	0.0081634	-0.894427	0.333333	-0.942809	0.333333	0.0081634	1	2.08813	0.0081634	11	1.1	3.75	1.90689	11
IBP2_HUMAN	Insulin-like growth factor-binding protein 2	IGFBP2	1.5	1.5	2.4	4.1	1.7	2.6	-0.714545	0.285455	-0.894427	0.333333	-0.942809	0.333333	0.285455	0	0.544462	0.285455	1.44444	0.65	1.43333	0.519374	1.44444
ENPL_HUMAN	Endoplasmin	HSP90B1	1	1	1	0.9	1.3	0.9	-0.333333	0.666667	0	1	0	1	0.666667	0	0.176091	0.666667	0.5	0.1	1.1	0.137504	0.5
FHR1_HUMAN	Complement factor H-related protein 1	CFHR1	1	1	1.5	1.5	1.3	0.6	0.100504	0.899496	0	1	0	1	0.899496	0	0.0460007	0.899496	-0.142857	-0.05	0.95	-0.0740006	-0.142857
PROP_HUMAN	Properdin	CFP	1	1	0.8	0.9	1.1	1	-0.57735	0.42265	-0.57735	1	-0.57735	1	0.42265	0	0.374019	0.42265	1	0.05	1.05	0.0703893	1
MYH9_HUMAN	Myosin-9	MYH9	0	0	0	0	0	0												0
DHX9_HUMAN	ATP-dependent RNA helicase A	DHX9	1	1	0.6	1.1	0.7	0.9	0.816497	0.183503	0.894427	0.333333	0.942809	0.333333	0.183503	0	0.736356	0.183503	-2	-0.2	0.8	-0.321928	-2
VIME_HUMAN	Vimentin	VIM	0.9	0.9	1.8	2.1	1.5	2	-0.923313	0.0766867	-0.894427	0.333333	-0.942809	0.333333	0.0766867	0	1.11528	0.0766867	3.4	0.85	1.94444	0.959358	3.4
A4_HUMAN	Amyloid beta A4 protein	APP	1.1	1.2	3.1	0	2.9	1.3	-0.642317	0.357683	-0.816497	0.333333	-0.894427	0.333333	0.357683	0	0.446502	0.357683	1.18519	0.95	1.82609	0.868755	1.11765
LRP1_HUMAN	Prolow-density lipoprotein receptor-related protein 1	LRP1	1	1	0.4	1.4	0.9	1.6	-0.450835	0.549165	0	1	0	1	0.549165	0	0.260297	0.549165	0.714286	0.25	1.25	0.321928	0.714286
DSG2_HUMAN	Desmoglein-2	DSG2	1	1	1	1	1.3	1.1	-0.816497	0.183503	-0.894427	0.333333	-0.942809	0.333333	0.183503	0	0.736356	0.183503	2	0.2	1.2	0.263034	2
FCGBP_HUMAN	IgGFc-binding protein	FCGBP	0.9	0.9	1	2.5	1.1	1.8	-0.743311	0.256689	-0.894427	0.333333	-0.942809	0.333333	0.256689	0	0.590593	0.256689	1.57143	0.55	1.61111	0.688056	1.57143
LAMB1_HUMAN	Laminin subunit beta-1	LAMB1	1.1	0.2	0.9	9	0.2	6.9	-0.518685	0.481315	-0.223607	1	-0.235702	1	0.481315	0	0.31757	0.481315	0.857966	2.9	5.46154	2.44931	0.763158
MA1A1_HUMAN	Mannosyl-oligosaccharide 1,2-alpha-mannosidase IA	MAN1A1	1	1	0.8	0.9	1	0.7	0.57735	0.42265	0.57735	1	0.57735	1	0.42265	0	0.374019	0.42265	-1	-0.15	0.85	-0.234465	-1
PZP_HUMAN	Pregnancy zone protein	PZP	1.2	1.3	2.5	8.6	3.8	6.7	-0.889768	0.110232	-0.816497	0.333333	-0.894427	0.333333	0.110232	0	0.957693	0.110232	2.75698	4	4.2	2.07039	2.66667
UBR1_HUMAN	E3 ubiquitin-protein ligase UBR1	UBR1	1	1	1.2	1.2	2.1	1.7	-0.953998	0.0460019	-0.894427	0.333333	-0.942809	0.333333	0.0460019	0	1.33722	0.0460019	4.5	0.9	1.9	0.925999	4.5
C1RL_HUMAN	Complement C1r subcomponent-like protein	C1RL	1	1	1	0.9	1.4	1.2	-0.904534	0.095466	-0.894427	0.333333	-0.942809	0.333333	0.095466	0	1.02015	0.095466	3	0.3	1.3	0.378512	3
CAH1_HUMAN	Carbonic anhydrase 1	CA1	0.9	0.9	1.2	1	1.9	1.4	-0.904534	0.095466	-0.894427	0.333333	-0.942809	0.333333	0.095466	0	1.02015	0.095466	3	0.75	1.83333	0.874469	3
TYB4_HUMAN	Thymosin beta-4	TMSB4X	1	1	0.8	0.7	1.3	1.2	-0.96225	0.0377496	-0.894427	0.333333	-0.942809	0.333333	0.0377496	0	1.42309	0.0377496	5	0.25	1.25	0.321928	5
FCN3_HUMAN	Ficolin-3	FCN3	1	1	1	1.3	1	1.7	-0.57735	0.42265	-0.57735	1	-0.57735	1	0.42265	0	0.374019	0.42265	1	0.35	1.35	0.432959	1
FHR5_HUMAN	Complement factor H-related protein 5	CFHR5	1.1	1.1	1.3	1.4	1.7	2.4	-0.886844	0.113156	-0.894427	0.333333	-0.942809	0.333333	0.113156	0	0.946323	0.113156	2.71429	0.95	1.86364	0.89812	2.71429
POSTN_HUMAN	Periostin	POSTN	1	1	0.6	0.8	0.6	0.7	0.980196	0.0198039	0.894427	0.333333	0.942809	0.333333	0.0198039	0	1.70325	0.0198039	-7	-0.35	0.65	-0.621488	-7
GP1BA_HUMAN	Platelet glycoprotein Ib alpha chain	GP1BA	1	1	0.7	0.6	0.9	0.9	1	0	1	0.333333	1	0.333333	0	1	65535	0	65535	-0.1	0.9	-0.152003	65535
ICAM1_HUMAN	Intercellular adhesion molecule 1	ICAM1	1	1	0.8	1	1.1	1.4	-0.762493	0.237507	-0.894427	0.333333	-0.942809	0.333333	0.237507	0	0.624323	0.237507	1.66667	0.25	1.25	0.321928	1.66667
MBL2_HUMAN	Mannose-binding protein C	MBL2	1	1	0.8	0.9	0.5	0.6	0.987878	0.0121217	0.894427	0.333333	0.942809	0.333333	0.0121217	0	1.91644	0.0121217	-9	-0.45	0.55	-0.862496	-9
CAP1_HUMAN	Adenylyl cyclase-associated protein 1	CAP1	1	1	1	1.1	1.2	1.9	-0.743311	0.256689	-0.894427	0.333333	-0.942809	0.333333	0.256689	0	0.590593	0.256689	1.57143	0.55	1.55	0.632268	1.57143
PCSK9_HUMAN	Proprotein convertase subtilisin/kexin type 9	PCSK9	1	1	1.2	0.7	1.8	1.3	-0.841191	0.158809	-0.894427	0.333333	-0.942809	0.333333	0.158809	0	0.799125	0.158809	2.2	0.55	1.55	0.632268	2.2
PSMD1_HUMAN	26S proteasome non-ATPase regulatory subunit 1	PSMD1	1	1	1	1.3	1.5	1.2	-0.855186	0.144814	-0.894427	0.333333	-0.942809	0.333333	0.144814	0	0.83919	0.144814	2.33333	0.35	1.35	0.432959	2.33333
AMPN_HUMAN	Aminopeptidase N	ANPEP	1	1	0.8	1	0.9	1	0.57735	0.42265	0.57735	1	0.57735	1	0.42265	0	0.374019	0.42265	-1	-0.05	0.95	-0.0740006	-1
ATRN_HUMAN	Attractin	ATRN	1.1	1.1	0.7	0.8	0.9	1.1	0.57735	0.42265	0.57735	1	0.57735	1	0.42265	0	0.374019	0.42265	-1	-0.1	0.909091	-0.137504	-1
CRAC1_HUMAN	Cartilage acidic protein 1	CRTAC1	0.9	0.8	0.8	1.1	1	1.1	-0.894427	0.105573	-0.816497	0.333333	-0.894427	0.333333	0.105573	0	0.976448	0.105573	2.82843	0.2	1.23529	0.304855	2
SODE_HUMAN	Extracellular superoxide dismutase [Cu-Zn]	SOD3	1.1	1.1	0.7	0.8	1.5	1.9	-0.904534	0.095466	-0.894427	0.333333	-0.942809	0.333333	0.095466	0	1.02015	0.095466	3	0.6	1.54545	0.628031	3
ENPP2_HUMAN	Ectonucleotide pyrophosphatase/phosphodiesterase family member 2	ENPP2	1.1	1	0.6	0.9	0.8	1.4	-0.11547	0.88453	0	1	0	1	0.88453	0	0.0532875	0.88453	0.164399	0.05	1.04762	0.0671142	0.142857
NRP1_HUMAN	Neuropilin-1	NRP1	0.9	0.9	0.5	0.8	0.6	0.8	0.816497	0.183503	0.894427	0.333333	0.942809	0.333333	0.183503	0	0.736356	0.183503	-2	-0.2	0.777778	-0.36257	-2
PRDX2_HUMAN	Peroxiredoxin-2	PRDX2	1	1	0.9	0.8	1	1.2	-0.57735	0.42265	-0.57735	1	-0.57735	1	0.42265	0	0.374019	0.42265	1	0.1	1.1	0.137504	1
SPRL1_HUMAN	SPARC-like protein 1	SPARCL1	1	1	1	0.8	1.4	1.5	-0.987878	0.0121217	-0.894427	0.333333	-0.942809	0.333333	0.0121217	0	1.91644	0.0121217	9	0.45	1.45	0.536053	9
TPIS_HUMAN	Triosephosphate isomerase	TPI1	1	1	1	2.1	1.2	2.2	-0.703526	0.296474	-0.894427	0.333333	-0.942809	0.333333	0.296474	0	0.528014	0.296474	1.4	0.7	1.7	0.765535	1.4
CO1A1_HUMAN	Collagen alpha-1(I) chain	COL1A1	1.1	1.1	0.3	0.1	0.3	0.1	0.987878	0.0121217	0.894427	0.333333	0.942809	0.333333	0.0121217	0	1.91644	0.0121217	-9	-0.9	0.181818	-2.45943	-9
1433E_HUMAN	14-3-3 protein epsilon	YWHAE	0	0	0	0	0	0												0
LAMP2_HUMAN	Lysosome-associated membrane glycoprotein 2	LAMP2	0.8	0	1.1	0	1.1	29	-0.596027	0.403973	-0.816497	0.333333	-0.894427	0.333333	0.403973	0	0.393648	0.403973	1.04975	14.65	37.625	5.23362	1.02091
HSP7C_HUMAN	Heat shock cognate 71 kDa protein	HSPA8	1	0.9	2.2	7.1	2.4	8.9	-0.714917	0.285083	-0.816497	0.333333	-0.894427	0.333333	0.285083	0	0.545028	0.285083	1.44598	4.7	5.94737	2.57225	1.42424
VASN_HUMAN	Vasorin	VASN	1	1.1	0.9	0.9	1.2	1.2	-0.904534	0.095466	-0.894427	0.333333	-0.942809	0.333333	0.095466	0	1.02015	0.095466	3	0.15	1.14286	0.192645	3
SODC_HUMAN	Superoxide dismutase [Cu-Zn]	SOD1	1	1	1.1	1	1.1	1.3	-0.816497	0.183503	-0.894427	0.333333	-0.942809	0.333333	0.183503	0	0.736356	0.183503	2	0.2	1.2	0.263034	2
PVR_HUMAN	Poliovirus receptor	PVR	1	1	1.2	0.6	2	1.3	-0.795587	0.204413	-0.894427	0.333333	-0.942809	0.333333	0.204413	0	0.689492	0.204413	1.85714	0.65	1.65	0.722466	1.85714
SRCRM_HUMAN	Scavenger receptor cysteine-rich domain-containing protein SCART1		1	1	0.8	0.8	0.7	0.7	1	0	1	0.333333	1	0.333333	0	1	65535	0	65535	-0.3	0.7	-0.514573	65535
FHAD1_HUMAN	Forkhead-associated domain-containing protein 1	FHAD1	0	0	0	0	0	0												0
IPSP_HUMAN	Plasma serine protease inhibitor	SERPINA5	1	1	1	1.4	1	0.7	0.57735	0.42265	0.57735	1	0.57735	1	0.42265	0	0.374019	0.42265	-1	-0.15	0.85	-0.234465	-1
APOA1_HUMAN	Apolipoprotein A-I	APOA1	1.1	1.1	0.8	1.4	1.2	2	-0.662266	0.337734	-0.894427	0.333333	-0.942809	0.333333	0.337734	0	0.471425	0.337734	1.25	0.5	1.45455	0.540568	1.25
APOM_HUMAN	Apolipoprotein M	APOM	1	1	1	1.4	1.4	1.3	-0.980196	0.0198039	-0.894427	0.333333	-0.942809	0.333333	0.0198039	0	1.70325	0.0198039	7	0.35	1.35	0.432959	7
NCAM1_HUMAN	Neural cell adhesion molecule 1	NCAM1	1.1	1	0.9	0.6	1.2	0.8	0.169031	0.830969	0	1	0	1	0.830969	0	0.0804151	0.830969	-0.242536	-0.05	0.952381	-0.0703893	-0.2
ALDOA_HUMAN	Fructose-bisphosphate aldolase A	ALDOA	1	1	1	1	1.1	1.2	-0.904534	0.095466	-0.894427	0.333333	-0.942809	0.333333	0.095466	0	1.02015	0.095466	3	0.15	1.15	0.201634	3
NEO1_HUMAN	Neogenin	NEO1	1	1	1	0.8	1	0.9	0.57735	0.42265	0.57735	1	0.57735	1	0.42265	0	0.374019	0.42265	-1	-0.05	0.95	-0.0740006	-1
C1QC_HUMAN	Complement C1q subcomponent subunit C	C1QC	0.9	0.9	0.8	0.8	0.8	0.9	0.57735	0.42265	0.57735	1	0.57735	1	0.42265	0	0.374019	0.42265	-1	-0.05	0.944444	-0.0824622	-1
LYSC_HUMAN	Lysozyme C	LYZ	1	1	1.1	1.4	0.9	1	0.57735	0.42265	0.57735	1	0.57735	1	0.42265	0	0.374019	0.42265	-1	-0.05	0.95	-0.0740006	-1
ACTS_HUMAN	Actin, alpha skeletal muscle	ACTA1	1	0.9	2.1	1.2	2.3	1.5	-0.857458	0.142542	-0.816497	0.333333	-0.894427	0.333333	0.142542	0	0.846057	0.142542	2.35666	0.95	2	1	2.11111
HBB_HUMAN	Hemoglobin subunit beta	HBB	1	1	0.8	0.8	1.1	1	-0.57735	0.42265	-0.57735	1	-0.57735	1	0.42265	0	0.374019	0.42265	1	0.05	1.05	0.0703893	1
MUC18_HUMAN	Cell surface glycoprotein MUC18	MCAM	1.1	1.2	1	1	1.4	1.5	-0.948683	0.0513167	-0.816497	0.333333	-0.894427	0.333333	0.0513167	0	1.28974	0.0513167	4.24264	0.3	1.26087	0.334419	3
C163A_HUMAN	Scavenger receptor cysteine-rich type 1 protein M130	CD163	1	1	1	0.9	1.2	0.8	0	1	0	1	0	1	1	0	0	1	0	0	1	0	0
CATD_HUMAN	Cathepsin D	CTSD	1	1	1.1	0.8	1.5	1.3	-0.942809	0.057191	-0.894427	0.333333	-0.942809	0.333333	0.057191	0	1.24267	0.057191	4	0.4	1.4	0.485427	4
PTPRS_HUMAN	Receptor-type tyrosine-protein phosphatase S	PTPRS	0	0	0	0	0	0												0
CSPG4_HUMAN	Chondroitin sulfate proteoglycan 4	CSPG4	1	0	1.1	0	1.2	0	-0.090167	0.909833	-0.223607	1	-0.235702	1	0.909833	0	0.0410383	0.909833	0.128037	0.1	1.2	0.263034	0.0909091
ATS13_HUMAN	A disintegrin and metalloproteinase with thrombospondin motifs 13	ADAMTS13	1	1	1.1	0.9	1.2	1.1	-0.904534	0.095466	-0.894427	0.333333	-0.942809	0.333333	0.095466	0	1.02015	0.095466	3	0.15	1.15	0.201634	3
NUCL_HUMAN	Nucleolin	NCL	1.3	0	2.3	24.7	2.2	14.4	-0.661384	0.338616	-0.816497	0.333333	-0.894427	0.333333	0.338616	0	0.470292	0.338616	1.24704	7.65	12.7692	3.6746	1.13333
PROC_HUMAN	Vitamin K-dependent protein C	PROC	1	1	1.1	1	0.9	1.1	-3.92523e-16	1	0	1	0	1	1	0	0	1	0	0	1	0	0
SPRC_HUMAN	SPARC	SPARC	1	1	0.9	0.5	1.1	0.8	0.229416	0.770584	0	1	0	1	0.770584	0	0.11318	0.770584	-0.333333	-0.05	0.95	-0.0740006	-0.333333
TRFL_HUMAN	Lactotransferrin	LTF	1	1	0.7	1	1.3	1	-0.57735	0.42265	-0.57735	1	-0.57735	1	0.42265	0	0.374019	0.42265	1	0.15	1.15	0.201634	1
DOPO_HUMAN	Dopamine beta-hydroxylase	DBH	1	1	0.8	0.8	1	0.9	0.57735	0.42265	0.57735	1	0.57735	1	0.42265	0	0.374019	0.42265	-1	-0.05	0.95	-0.0740006	-1
COF1_HUMAN	Cofilin-1	CFL1	1	1	1	0.8	1.2	1.3	-0.96225	0.0377496	-0.894427	0.333333	-0.942809	0.333333	0.0377496	0	1.42309	0.0377496	5	0.25	1.25	0.321928	5
CO6A1_HUMAN	Collagen alpha-1(VI) chain	COL6A1	1	0.2	0.4	4.9	0.6	0	0.390567	0.609433	0.408248	0.666667	0.447214	0.666667	0.609433	0	0.215074	0.609433	-0.6	-0.3	0.5	-1	-0.428571
TPM3_HUMAN	Tropomyosin alpha-3 chain	TPM3	0.6	0.6	2.2	0.8	2.8	1.5	-0.860116	0.139884	-0.894427	0.333333	-0.942809	0.333333	0.139884	0	0.854233	0.139884	2.38462	1.55	3.58333	1.8413	2.38462
PGAM1_HUMAN	Phosphoglycerate mutase 1	PGAM1	1	1	15.5	3.2	5.3	1.1	-0.595247	0.404753	-0.894427	0.333333	-0.942809	0.333333	0.404753	0	0.39281	0.404753	1.04762	2.2	3.2	1.67807	1.04762
LMNB1_HUMAN	Lamin-B1	LMNB1	0	0	0	0	0	0												0
UBE2N_HUMAN	Ubiquitin-conjugating enzyme E2 N	UBE2N	1	0	0.9	0	1.1	100	-0.581973	0.418027	-0.816497	0.333333	-0.894427	0.333333	0.418027	0	0.378795	0.418027	1.01208	50.05	101.1	6.65964	1.002
PTPRF_HUMAN	Receptor-type tyrosine-protein phosphatase F	PTPRF	1	0	1.1	0	1	0	0	1	0	1	0	1	1	0	0	1	0	0	1	0	0
CD166_HUMAN	CD166 antigen	ALCAM	1	1	0.6	0.7	0.9	0.6	0.762493	0.237507	0.894427	0.333333	0.942809	0.333333	0.237507	0	0.624323	0.237507	-1.66667	-0.25	0.75	-0.415037	-1.66667
COR1A_HUMAN	Coronin-1A	CORO1A	0.6	0.6	1.8	1.3	3	2.3	-0.972066	0.0279337	-0.894427	0.333333	-0.942809	0.333333	0.0279337	0	1.55387	0.0279337	5.85714	2.05	4.41667	2.14296	5.85714
LDHA_HUMAN	L-lactate dehydrogenase A chain	LDHA	0.9	0.9	2.6	2.3	2.5	1.7	-0.904534	0.095466	-0.894427	0.333333	-0.942809	0.333333	0.095466	0	1.02015	0.095466	3	1.2	2.33333	1.22239	3
TALDO_HUMAN	Transaldolase	TALDO1	0.9	0.9	1.4	1.1	1.1	1.3	-0.904534	0.095466	-0.894427	0.333333	-0.942809	0.333333	0.095466	0	1.02015	0.095466	3	0.3	1.33333	0.415037	3
IL1AP_HUMAN	Interleukin-1 receptor accessory protein	IL1RAP	1	1	0.8	0.8	1	1.1	-0.57735	0.42265	-0.57735	1	-0.57735	1	0.42265	0	0.374019	0.42265	1	0.05	1.05	0.0703893	1
CHL1_HUMAN	Neural cell adhesion molecule L1-like protein	CHL1	1	1	0.7	0.8	0.9	1	0.57735	0.42265	0.57735	1	0.57735	1	0.42265	0	0.374019	0.42265	-1	-0.05	0.95	-0.0740006	-1
SAA4_HUMAN	Serum amyloid A-4 protein	SAA4	1.1	1.1	2	2	2.4	2.8	-0.982683	0.0173173	-0.894427	0.333333	-0.942809	0.333333	0.0173173	0	1.76152	0.0173173	7.5	1.5	2.36364	1.24101	7.5
PTGDS_HUMAN	Prostaglandin-H2 D-isomerase	PTGDS	1	1	0.6	0.6	0.5	0.4	0.991837	0.0081634	0.894427	0.333333	0.942809	0.333333	0.0081634	1	2.08813	0.0081634	-11	-0.55	0.45	-1.152	-11
COBA2_HUMAN	Collagen alpha-2(XI) chain	COL11A2	1	1	0.6	0.4	0.9	0.4	0.703526	0.296474	0.894427	0.333333	0.942809	0.333333	0.296474	0	0.528014	0.296474	-1.4	-0.35	0.65	-0.621488	-1.4
VP13A_HUMAN	Vacuolar protein sorting-associated protein 13A	VPS13A	0	1	0	1.4	0	1.8	-0.264906	0.735094	-0.223607	1	-0.235702	1	0.735094	0	0.133657	0.735094	0.388514	0.4	1.8	0.847997	0.285714
NUCB1_HUMAN	Nucleobindin-1	NUCB1	0	0	0	0	0	0												0
KIT_HUMAN	Mast/stem cell growth factor receptor Kit	KIT	1	1	0.8	1	0.4	0.6	0.96225	0.0377496	0.894427	0.333333	0.942809	0.333333	0.0377496	0	1.42309	0.0377496	-5	-0.5	0.5	-1	-5
K1C9_HUMAN	Keratin, type I cytoskeletal 9	KRT9	0	0	0	0	0	0												0
CALD1_HUMAN	Caldesmon	CALD1	1.2	1.1	1.2	0.6	1.8	1.2	-0.631169	0.368831	-0.67082	0.666667	-0.707107	0.666667	0.368831	0	0.433172	0.368831	1.15079	0.35	1.30435	0.383329	1
MEGF8_HUMAN	Multiple epidermal growth factor-like domains protein 8	MEGF8	0	0	0	0	0	0												0
UB2V2_HUMAN	Ubiquitin-conjugating enzyme E2 variant 2	UBE2V2	1	1	0.9	0.9	1.2	1	-0.57735	0.42265	-0.57735	1	-0.57735	1	0.42265	0	0.374019	0.42265	1	0.1	1.1	0.137504	1
VGFR3_HUMAN	Vascular endothelial growth factor receptor 3	FLT4	1	0	1	0	0.9	0	0.0524864	0.947514	0.223607	1	0.235702	1	0.947514	0	0.0234145	0.947514	-0.0743294	-0.05	0.9	-0.152003	-0.0526316
APOC4_HUMAN	Apolipoprotein C-IV	APOC4	1	1	1.3	2.5	1.1	2.7	-0.622543	0.377457	-0.894427	0.333333	-0.942809	0.333333	0.377457	0	0.423133	0.377457	1.125	0.9	1.9	0.925999	1.125
PTPRJ_HUMAN	Receptor-type tyrosine-protein phosphatase eta	PTPRJ	1	1	0.7	1.2	0.8	1.5	-0.290021	0.709979	0	1	0	1	0.709979	0	0.148754	0.709979	0.428571	0.15	1.15	0.201634	0.428571
CALR_HUMAN	Calreticulin	CALR	1.1	1.1	0.8	1.4	1.1	1.5	-0.57735	0.42265	-0.57735	1	-0.57735	1	0.42265	0	0.374019	0.42265	1	0.2	1.18182	0.241008	1
GPV_HUMAN	Platelet glycoprotein V	GP5	1	1	1.4	0.8	0.6	1	0.57735	0.42265	0.57735	1	0.57735	1	0.42265	0	0.374019	0.42265	-1	-0.2	0.8	-0.321928	-1
1433G_HUMAN	14-3-3 protein gamma	YWHAG	1	1	1.5	2.1	2.3	3	-0.95783	0.0421697	-0.894427	0.333333	-0.942809	0.333333	0.0421697	0	1.375	0.0421697	4.71429	1.65	2.65	1.40599	4.71429
TRML1_HUMAN	Trem-like transcript 1 protein	TREML1	1	1	1.2	1.3	1.3	1.2	-0.96225	0.0377496	-0.894427	0.333333	-0.942809	0.333333	0.0377496	0	1.42309	0.0377496	5	0.25	1.25	0.321928	5
LRRF2_HUMAN	Leucine-rich repeat flightless-interacting protein 2	LRRFIP2	1	1	1.1	1.2	1.4	1.7	-0.933008	0.0669922	-0.894427	0.333333	-0.942809	0.333333	0.0669922	0	1.17398	0.0669922	3.66667	0.55	1.55	0.632268	3.66667
CE162_HUMAN	Centrosomal protein of 162 kDa	KIAA1009	1	0	0.9	0	1.6	0	-0.219382	0.780618	-0.223607	1	-0.235702	1	0.780618	0	0.107561	0.780618	0.317999	0.3	1.6	0.678072	0.230769
LTBP1_HUMAN	Latent-transforming growth factor beta-binding protein 1	LTBP1	0	1	0	1.2	0	1.2	-0.090167	0.909833	-0.223607	1	-0.235702	1	0.909833	0	0.0410383	0.909833	0.128037	0.1	1.2	0.263034	0.0909091
CAD13_HUMAN	Cadherin-13	CDH13	1	1	0.9	0.8	0.9	1.4	-0.390567	0.609433	0	1	0	1	0.609433	0	0.215074	0.609433	0.6	0.15	1.15	0.201634	0.6
TKT_HUMAN	Transketolase	TKT	1.1	1.1	1.2	1.4	1.3	1.3	-1	0	-1	0.333333	-1	0.333333	0	1	65535	0	65535	0.2	1.18182	0.241008	65535
CAH2_HUMAN	Carbonic anhydrase 2	CA2	0.9	1	1.2	1.4	1.7	1.8	-0.992278	0.00772212	-0.816497	0.333333	-0.894427	0.333333	0.00772212	1	2.11226	0.00772212	11.3137	0.8	1.84211	0.881356	8
F13A_HUMAN	Coagulation factor XIII A chain	F13A1	1.1	1.1	0.8	0.8	1.1	0.8	0.57735	0.42265	0.57735	1	0.57735	1	0.42265	0	0.374019	0.42265	-1	-0.15	0.863636	-0.211504	-1
ALDOB_HUMAN	Fructose-bisphosphate aldolase B	ALDOB	1	1	1	1.1	1.2	1.7	-0.786334	0.213666	-0.894427	0.333333	-0.942809	0.333333	0.213666	0	0.670264	0.213666	1.8	0.45	1.45	0.536053	1.8
B2MG_HUMAN	Beta-2-microglobulin	B2M	1	1	0.9	0.8	0.5	0.4	0.991837	0.0081634	0.894427	0.333333	0.942809	0.333333	0.0081634	1	2.08813	0.0081634	-11	-0.55	0.45	-1.152	-11
GOLM1_HUMAN	Golgi membrane protein 1	GOLM1	1	1	0.8	0.4	0.9	0	0.653882	0.346118	0.894427	0.333333	0.942809	0.333333	0.346118	0	0.460776	0.346118	-1.22222	-0.55	0.45	-1.152	-1.22222
GDIR1_HUMAN	Rho GDP-dissociation inhibitor 1	ARHGDIA	0.8	0.8	1.9	0.8	1.5	0.5	-0.272166	0.727834	0	1	0	1	0.727834	0	0.137967	0.727834	0.4	0.2	1.25	0.321928	0.4
PROZ_HUMAN	Vitamin K-dependent protein Z	PROZ	1.1	1.1	1.1	1.3	1.4	1.8	-0.870388	0.129612	-0.894427	0.333333	-0.942809	0.333333	0.129612	0	0.887356	0.129612	2.5	0.5	1.45455	0.540568	2.5
PCOC1_HUMAN	Procollagen C-endopeptidase enhancer 1	PCOLCE	1	1	0.5	1	0.7	0.8	0.96225	0.0377496	0.894427	0.333333	0.942809	0.333333	0.0377496	0	1.42309	0.0377496	-5	-0.25	0.75	-0.415037	-5
CI050_HUMAN	Uncharacterized protein C9orf50	C9orf50	1	0	0.8	0	1	0	0	1	0	1	0	1	1	0	0	1	0	0	1	0	0
GNPTG_HUMAN	N-acetylglucosamine-1-phosphotransferase subunit gamma	GNPTG	0.9	0.9	1.1	1.7	1.1	1.9	-0.727607	0.272393	-0.894427	0.333333	-0.942809	0.333333	0.272393	0	0.564804	0.272393	1.5	0.6	1.66667	0.736966	1.5
BLMH_HUMAN	Bleomycin hydrolase	BLMH	0.7	0	0.9	20.7	0.3	17.2	-0.574736	0.425264	-0.408248	0.666667	-0.447214	0.666667	0.425264	0	0.371342	0.425264	0.993231	8.4	25	4.64386	0.954545
CADH1_HUMAN	Cadherin-1	CDH1	1	1	1	0.6	0.9	1.2	-0.229416	0.770584	0	1	0	1	0.770584	0	0.11318	0.770584	0.333333	0.05	1.05	0.0703893	0.333333
HEG1_HUMAN	Protein HEG homolog 1	HEG1	1	0.9	1.3	1.8	0	2.4	-0.145617	0.854383	0	1	0	1	0.854383	0	0.0683476	0.854383	0.208153	0.25	1.26316	0.337035	0.2
PABP1_HUMAN	Polyadenylate-binding protein 1	PABPC1	0	0	0	0	0	0												0
NOE1_HUMAN	Noelin	OLFM1	1	0	0.6	0	0.8	0	0.109764	0.890236	0.223607	1	0.235702	1	0.890236	0	0.050495	0.890236	-0.156174	-0.1	0.8	-0.321928	-0.111111
G6PI_HUMAN	Glucose-6-phosphate isomerase	GPI	1	1	5.4	1.9	4	1.8	-0.77374	0.22626	-0.894427	0.333333	-0.942809	0.333333	0.22626	0	0.645392	0.22626	1.72727	1.9	2.9	1.53605	1.72727
ANXA1_HUMAN	Annexin A1	ANXA1	0	0	0	0	0	0												0
FIBG_HUMAN	Fibrinogen gamma chain	FGG	0.9	0.9	0.5	0.6	0.6	0.6	1	0	1	0.333333	1	0.333333	0	1	65535	0	65535	-0.3	0.666667	-0.584963	65535
FSTL1_HUMAN	Follistatin-related protein 1	FSTL1	0	0	0	0	0	0												0
NID1_HUMAN	Nidogen-1	NID1	1	1	0.7	1.5	0.8	2.1	-0.439679	0.560321	0	1	0	1	0.560321	0	0.251563	0.560321	0.692308	0.45	1.45	0.536053	0.692308
HBA_HUMAN	Hemoglobin subunit alpha	HBA1	1	1	0.8	1	1	1												0	1	0
GGH_HUMAN	Gamma-glutamyl hydrolase	GGH	1	1	0.9	2.4	0.7	0.7	1	0	1	0.333333	1	0.333333	0	1	65535	0	65535	-0.3	0.7	-0.514573	65535
COTL1_HUMAN	Coactosin-like protein	COTL1	1.5	1.4	2	2.2	2	1.2	-0.254457	0.745543	0	1	0	1	0.745543	0	0.127527	0.745543	0.372104	0.15	1.10345	0.142019	0.333333
LASP1_HUMAN	LIM and SH3 domain protein 1	LASP1	1	1.1	1	3.4	1.4	4	-0.667655	0.332345	-0.816497	0.333333	-0.894427	0.333333	0.332345	0	0.478411	0.332345	1.26829	1.65	2.57143	1.36257	1.22222
VASP_HUMAN	Vasodilator-stimulated phosphoprotein	VASP	1.2	1.2	1	1.6	1.7	3.4	-0.746837	0.253163	-0.894427	0.333333	-0.942809	0.333333	0.253163	0	0.5966	0.253163	1.58824	1.35	2.125	1.08746	1.58824
ITA6_HUMAN	Integrin alpha-6	ITGA6	0	0	0	0	0	0												0
WDR87_HUMAN	WD repeat-containing protein 87	WDR87	1	0	1.5	0	1.4	0	-0.162221	0.837779	-0.223607	1	-0.235702	1	0.837779	0	0.0768707	0.837779	0.232495	0.2	1.4	0.485427	0.166667
PDIA1_HUMAN	Protein disulfide-isomerase	P4HB	1	1	1	0.7	1.4	0.7	-0.100504	0.899496	0	1	0	1	0.899496	0	0.0460007	0.899496	0.142857	0.05	1.05	0.0703893	0.142857
C4BPA_HUMAN	C4b-binding protein alpha chain	C4BPA	0.8	0.8	1	1.1	1.1	0.9	-0.816497	0.183503	-0.894427	0.333333	-0.942809	0.333333	0.183503	0	0.736356	0.183503	2	0.2	1.25	0.321928	2
STMN1_HUMAN	Stathmin	STMN1	0	2.1	100	21.1	100	10.2	-0.648078	0.351922	-0.816497	0.333333	-0.894427	0.333333	0.351922	0	0.453554	0.351922	1.20346	54.05	52.4762	5.71359	1.17628
THIO_HUMAN	Thioredoxin	TXN	1	1.1	1.3	0	1.3	2.4	-0.715542	0.284458	-0.816497	0.333333	-0.894427	0.333333	0.284458	0	0.545981	0.284458	1.44857	0.8	1.7619	0.817136	1.33333
PPBT_HUMAN	Alkaline phosphatase, tissue-nonspecific isozyme	ALPL	1	1	0.8	1	0.7	1	0.57735	0.42265	0.57735	1	0.57735	1	0.42265	0	0.374019	0.42265	-1	-0.15	0.85	-0.234465	-1
DBNL_HUMAN	Drebrin-like protein	DBNL	0	1	0	0.5	42.6	1.3	-0.591863	0.408137	-0.816497	0.333333	-0.894427	0.333333	0.408137	0	0.389194	0.408137	1.03844	21.45	43.9	5.45615	1.01418
KKCC2_HUMAN	Calcium/calmodulin-dependent protein kinase kinase 2	CAMKK2	0	0	0	0	0	0												0
APOA_HUMAN	Apolipoprotein(a)	LPA	1	0	1	0	0.4	0	0.366508	0.633492	0.223607	1	0.235702	1	0.633492	0	0.198259	0.633492	-0.557086	-0.3	0.4	-1.32193	-0.428571
LAMA2_HUMAN	Laminin subunit alpha-2	LAMA2	1	0	1.7	0	0	0	0.57735	0.42265	0.57735	1	0.57735	1	0.42265	0	0.374019	0.42265	-1	-0.5	0	65535	-1
ACY1_HUMAN	Aminoacylase-1	ACY1	0	1	0	0.4	0	0.6	0.235702	0.764298	0.223607	1	0.235702	1	0.764298	0	0.116737	0.764298	-0.342997	-0.2	0.6	-0.736966	-0.25
MYH11_HUMAN	Myosin-11	MYH11	1	0	0.5	0	1	0	0	1	0	1	0	1	1	0	0	1	0	0	1	0	0
NINL_HUMAN	Ninein-like protein	NINL	0	1	0	0.7	0	1.1	-0.0475114	0.952489	-0.223607	1	-0.235702	1	0.952489	0	0.0211402	0.952489	0.0672673	0.05	1.1	0.137504	0.047619
RHG23_HUMAN	Rho GTPase-activating protein 23	ARHGAP23	0	1	0	1.1	0	1.2	-0.090167	0.909833	-0.223607	1	-0.235702	1	0.909833	0	0.0410383	0.909833	0.128037	0.1	1.2	0.263034	0.0909091
ICAM2_HUMAN	Intercellular adhesion molecule 2	ICAM2	1.1	1.1	0.7	0.8	1.1	0.7	0.57735	0.42265	0.57735	1	0.57735	1	0.42265	0	0.374019	0.42265	-1	-0.2	0.818182	-0.289507	-1
RARR2_HUMAN	Retinoic acid receptor responder protein 2	RARRES2	1	1	1	0.8	1.2	0.8	0	1	0	1	0	1	1	0	0	1	0	0	1	0	0
FCG3A_HUMAN	Low affinity immunoglobulin gamma Fc region receptor III-A	FCGR3A	0.9	0.9	0.8	1.1	1	1	-1	0	-1	0.333333	-1	0.333333	0	1	65535	0	65535	0.1	1.11111	0.152003	65535
CSF1R_HUMAN	Macrophage colony-stimulating factor 1 receptor	CSF1R	1.3	1.3	1.4	1.1	2.3	1.8	-0.904534	0.095466	-0.894427	0.333333	-0.942809	0.333333	0.095466	0	1.02015	0.095466	3	0.75	1.57692	0.657112	3
BASP1_HUMAN	Brain acid soluble protein 1	BASP1	1	1	1.9	1.7	1.4	1	-0.57735	0.42265	-0.57735	1	-0.57735	1	0.42265	0	0.374019	0.42265	1	0.2	1.2	0.263034	1
LG3BP_HUMAN	Galectin-3-binding protein	LGALS3BP	0.1	1	47.3	0.8	62.1	0.9	-0.581686	0.418314	-0.408248	0.666667	-0.447214	0.666667	0.418314	0	0.378498	0.418314	1.01133	30.95	57.2727	5.83978	0.996779
ROA1_HUMAN	Heterogeneous nuclear ribonucleoprotein A1	HNRNPA1	0.4	0	2.8	0	1.1	0	-0.38949	0.61051	-0.223607	1	-0.235702	1	0.61051	0	0.214308	0.61051	0.59805	0.35	2.75	1.45943	0.466667
SH3L3_HUMAN	SH3 domain-binding glutamic acid-rich-like protein 3	SH3BGRL3	1	1	1.2	0.7	1.2	0.6	0.229416	0.770584	0	1	0	1	0.770584	0	0.11318	0.770584	-0.333333	-0.1	0.9	-0.152003	-0.333333
ROA2_HUMAN	Heterogeneous nuclear ribonucleoproteins A2/B1	HNRNPA2B1	0	1	0	1.2	0	1.2	-0.090167	0.909833	-0.223607	1	-0.235702	1	0.909833	0	0.0410383	0.909833	0.128037	0.1	1.2	0.263034	0.0909091
CALM_HUMAN	Calmodulin	CALM1	1.1	1.1	0.8	1.1	1.1	0.9	0.57735	0.42265	0.57735	1	0.57735	1	0.42265	0	0.374019	0.42265	-1	-0.1	0.909091	-0.137504	-1
CLC11_HUMAN	C-type lectin domain family 11 member A	CLEC11A	1	1	1.5	0.9	2.7	0.9	-0.532152	0.467848	0	1	0	1	0.467848	0	0.329895	0.467848	0.888889	0.8	1.8	0.847997	0.888889
EPHA7_HUMAN	Ephrin type-A receptor 7	EPHA7	0	0	0	0	0	0												0
BAHC1_HUMAN	BAH and coiled-coil domain-containing protein 1	BAHCC1	0	0	0	0	0	0												0
HENMT_HUMAN	Small RNA 2'-O-methyltransferase	HENMT1	1	0	0	0	1.3	0	-0.128271	0.871729	-0.223607	1	-0.235702	1	0.871729	0	0.0596184	0.871729	0.182913	0.15	1.3	0.378512	0.130435
ASCC2_HUMAN	Activating signal cointegrator 1 complex subunit 2	ASCC2	1	0	0.9	0	1.2	0	-0.090167	0.909833	-0.223607	1	-0.235702	1	0.909833	0	0.0410383	0.909833	0.128037	0.1	1.2	0.263034	0.0909091
K22E_HUMAN	Keratin, type II cytoskeletal 2 epidermal	KRT2	0	0	0	0	0	0												0
SDPR_HUMAN	Serum deprivation-response protein	SDPR	1	1	0.6	1	0.9	1.3	-0.333333	0.666667	0	1	0	1	0.666667	0	0.176091	0.666667	0.5	0.1	1.1	0.137504	0.5
HSP71_HUMAN	Heat shock 70 kDa protein 1A/1B	HSPA1A	0	0	0	0	0	0												0
MRC1_HUMAN	Macrophage mannose receptor 1	MRC1	1	1	1.1	1.1	0.8	2.2	-0.450835	0.549165	0	1	0	1	0.549165	0	0.260297	0.549165	0.714286	0.5	1.5	0.584963	0.714286
PGK1_HUMAN	Phosphoglycerate kinase 1	PGK1	1	1	1.9	1.1	2	1.5	-0.904534	0.095466	-0.894427	0.333333	-0.942809	0.333333	0.095466	0	1.02015	0.095466	3	0.75	1.75	0.807355	3
PTPRG_HUMAN	Receptor-type tyrosine-protein phosphatase gamma	PTPRG	1	1	0	0.7	0	0.6	0.855186	0.144814	0.894427	0.333333	0.942809	0.333333	0.144814	0	0.83919	0.144814	-2.33333	-0.7	0.3	-1.73697	-2.33333
FBLN3_HUMAN	EGF-containing fibulin-like extracellular matrix protein 1	EFEMP1	1.4	1.4	1.2	1.6	1.1	2.1	-0.272166	0.727834	0	1	0	1	0.727834	0	0.137967	0.727834	0.4	0.2	1.14286	0.192645	0.4
DEF3_HUMAN	Neutrophil defensin 3	DEFA3	0	1	70.5	2.6	0	2.7	-0.385271	0.614729	-0.223607	1	-0.235702	1	0.614729	0	0.211316	0.614729	0.590434	0.85	2.7	1.43296	0.459459
HNRPK_HUMAN	Heterogeneous nuclear ribonucleoprotein K	HNRNPK	0.9	0.9	0.7	1.5	0	2.2	-0.127515	0.872485	0	1	0	1	0.872485	0	0.0592422	0.872485	0.181818	0.2	1.22222	0.289507	0.181818
GSTP1_HUMAN	Glutathione S-transferase P	GSTP1	0	0	0	0	0	0												0
SIA7A_HUMAN	Alpha-N-acetylgalactosaminide alpha-2,6-sialyltransferase 1	ST6GALNAC1	1	0	1.1	0	1	0	0	1	0	1	0	1	1	0	0	1	0	0	1	0	0
ADIPO_HUMAN	Adiponectin	ADIPOQ	1	1	0.5	0.8	1	1												0	1	0
BMP1_HUMAN	Bone morphogenetic protein 1	BMP1	0	0	0	0	0	0												0
KIF2A_HUMAN	Kinesin-like protein KIF2A	KIF2A	0	1	0	0.6	0	1.3	-0.128271	0.871729	-0.223607	1	-0.235702	1	0.871729	0	0.0596184	0.871729	0.182913	0.15	1.3	0.378512	0.130435
DEN4B_HUMAN	DENN domain-containing protein 4B	DENND4B	1	0	0.8	0	1.1	0	-0.0475114	0.952489	-0.223607	1	-0.235702	1	0.952489	0	0.0211402	0.952489	0.0672673	0.05	1.1	0.137504	0.047619
UBA1_HUMAN	Ubiquitin-like modifier-activating enzyme 1	UBA1	1	0.1	1.3	13.4	1.3	7.9	-0.651976	0.348024	-0.816497	0.333333	-0.894427	0.333333	0.348024	0	0.458391	0.348024	1.21602	4.05	8.36364	3.06413	1.08
EGLN_HUMAN	Endoglin	ENG	1	1	0.8	0.6	0.8	0.7	0.96225	0.0377496	0.894427	0.333333	0.942809	0.333333	0.0377496	0	1.42309	0.0377496	-5	-0.25	0.75	-0.415037	-5
CAPG_HUMAN	Macrophage-capping protein	CAPG	1	0	0.7	62.9	0.6	100	-0.578104	0.421896	-0.408248	0.666667	-0.447214	0.666667	0.421896	0	0.374795	0.421896	1.00196	49.8	100.6	6.65249	0.992032
RL40_HUMAN	Ubiquitin-60S ribosomal protein L40	UBA52	1	1	0.8	1.1	1.5	1.3	-0.942809	0.057191	-0.894427	0.333333	-0.942809	0.333333	0.057191	0	1.24267	0.057191	4	0.4	1.4	0.485427	4
1C07_HUMAN	HLA class I histocompatibility antigen, Cw-7 alpha chain	HLA-C	0	0	0	0	0	0												0
PODXL_HUMAN	Podocalyxin	PODXL	1	1	0.7	1.9	1.2	1.5	-0.855186	0.144814	-0.894427	0.333333	-0.942809	0.333333	0.144814	0	0.83919	0.144814	2.33333	0.35	1.35	0.432959	2.33333
MTPN_HUMAN	Myotrophin	MTPN	1	1	0.6	0.9	0.6	0.8	0.904534	0.095466	0.894427	0.333333	0.942809	0.333333	0.095466	0	1.02015	0.095466	-3	-0.3	0.7	-0.514573	-3
1A11_HUMAN	HLA class I histocompatibility antigen, A-11 alpha chain	HLA-A	0	0	0	0	0	0												0
AATC_HUMAN	Aspartate aminotransferase, cytoplasmic	GOT1	0	0	0	0	0	0												0
RBM39_HUMAN	RNA-binding protein 39	RBM39	0	0	0	0	0	0												0
1433B_HUMAN	14-3-3 protein beta/alpha	YWHAB	0	0	0	0	0	0												0
ANAG_HUMAN	Alpha-N-acetylglucosaminidase	NAGLU	1	1	0.7	0.8	0.9	0.7	0.816497	0.183503	0.894427	0.333333	0.942809	0.333333	0.183503	0	0.736356	0.183503	-2	-0.2	0.8	-0.321928	-2
GDIR2_HUMAN	Rho GDP-dissociation inhibitor 2	ARHGDIB	1	1	1	0.7	1.2	1.1	-0.904534	0.095466	-0.894427	0.333333	-0.942809	0.333333	0.095466	0	1.02015	0.095466	3	0.15	1.15	0.201634	3
BST1_HUMAN	ADP-ribosyl cyclase 2	BST1	1	0	0.5	100	0.5	100	-0.577331	0.422669	-0.408248	0.666667	-0.447214	0.666667	0.422669	0	0.373999	0.422669	0.99995	49.75	100.5	6.65105	0.99005
PEBP1_HUMAN	Phosphatidylethanolamine-binding protein 1	PEBP1	1	1	1.9	1.6	1.7	1.5	-0.973329	0.0266715	-0.894427	0.333333	-0.942809	0.333333	0.0266715	0	1.57395	0.0266715	6	0.6	1.6	0.678072	6
PPIB_HUMAN	Peptidyl-prolyl cis-trans isomerase B	PPIB	1	1	0.8	1.2	0.7	1.1	0.333333	0.666667	0	1	0	1	0.666667	0	0.176091	0.666667	-0.5	-0.1	0.9	-0.152003	-0.5
K2C1_HUMAN	Keratin, type II cytoskeletal 1	KRT1	1	1	1	0.8	1.2	1	-0.57735	0.42265	-0.57735	1	-0.57735	1	0.42265	0	0.374019	0.42265	1	0.1	1.1	0.137504	1
FUCO2_HUMAN	Plasma alpha-L-fucosidase	FUCA2	0	1.1	0	1.2	0	1.2	-0.0433963	0.956604	-0.223607	1	-0.235702	1	0.956604	0	0.0192679	0.956604	0.0614295	0.05	1.09091	0.125531	0.0434783
ICAM3_HUMAN	Intercellular adhesion molecule 3	ICAM3	1	0	0.5	91.1	0.5	100	-0.577331	0.422669	-0.408248	0.666667	-0.447214	0.666667	0.422669	0	0.373999	0.422669	0.99995	49.75	100.5	6.65105	0.99005
COL11_HUMAN	Collectin-11	COLEC11	0.9	0.9	0.7	0.7	0.7	0.6	0.96225	0.0377496	0.894427	0.333333	0.942809	0.333333	0.0377496	0	1.42309	0.0377496	-5	-0.25	0.722222	-0.469485	-5
TARSH_HUMAN	Target of Nesh-SH3	ABI3BP	0.9	0.9	0.6	0.6	0.9	0.9												0	1	0
KAD1_HUMAN	Adenylate kinase isoenzyme 1	AK1	1	0.8	0.6	8.5	0.6	8.7	-0.54765	0.45235	0	1	0	1	0.45235	0	0.344525	0.45235	0.925644	3.75	5.16667	2.36923	0.903614
6PGD_HUMAN	6-phosphogluconate dehydrogenase, decarboxylating	PGD	1.1	1	2.8	1.4	1.9	1.3	-0.787726	0.212274	-0.816497	0.333333	-0.894427	0.333333	0.212274	0	0.673104	0.212274	1.80839	0.55	1.52381	0.607683	1.57143
ALDOC_HUMAN	Fructose-bisphosphate aldolase C	ALDOC	1	1	0.9	1.1	0.8	1.3	-0.140028	0.859972	0	1	0	1	0.859972	0	0.0655157	0.859972	0.2	0.05	1.05	0.0703893	0.2
FGL2_HUMAN	Fibroleukin	FGL2	1	1	0.5	0.8	0.8	1.7	-0.365636	0.634364	0	1	0	1	0.634364	0	0.197662	0.634364	0.555556	0.25	1.25	0.321928	0.555556
CSDE1_HUMAN	Cold shock domain-containing protein E1	CSDE1	1	0	0.9	0	1.7	0	-0.243414	0.756586	-0.223607	1	-0.235702	1	0.756586	0	0.121142	0.756586	0.354914	0.35	1.7	0.765535	0.259259
CDHR2_HUMAN	Cadherin-related family member 2	CDHR2	0	1	0	0.8	0	1.1	-0.0475114	0.952489	-0.223607	1	-0.235702	1	0.952489	0	0.0211402	0.952489	0.0672673	0.05	1.1	0.137504	0.047619
ARHGB_HUMAN	Rho guanine nucleotide exchange factor 11	ARHGEF11	0	0	0	0	0	0												0
MMRN1_HUMAN	Multimerin-1	MMRN1	0	1	0	1.5	0	1.9	-0.284179	0.715821	-0.223607	1	-0.235702	1	0.715821	0	0.145196	0.715821	0.419172	0.45	1.9	0.925999	0.310345
EPHA4_HUMAN	Ephrin type-A receptor 4	EPHA4	0	1	0	1.4	0	1.4	-0.162221	0.837779	-0.223607	1	-0.235702	1	0.837779	0	0.0768707	0.837779	0.232495	0.2	1.4	0.485427	0.166667
CA2D1_HUMAN	Voltage-dependent calcium channel subunit alpha-2/delta-1	CACNA2D1	0	1	0	0.6	0	1.2	-0.090167	0.909833	-0.223607	1	-0.235702	1	0.909833	0	0.0410383	0.909833	0.128037	0.1	1.2	0.263034	0.0909091
FBX39_HUMAN	F-box only protein 39	FBXO39	0	0	0	0	0	0												0
LCAT_HUMAN	Phosphatidylcholine-sterol acyltransferase	LCAT	1	1	1.1	0.9	1.3	0.9	-0.333333	0.666667	0	1	0	1	0.666667	0	0.176091	0.666667	0.5	0.1	1.1	0.137504	0.5
1B07_HUMAN (+1)	HLA class I histocompatibility antigen, B-7 alpha chain	HLA-B	1	1	1.2	1	1.2	1.3	-0.96225	0.0377496	-0.894427	0.333333	-0.942809	0.333333	0.0377496	0	1.42309	0.0377496	5	0.25	1.25	0.321928	5
CNTN1_HUMAN	Contactin-1	CNTN1	1	1	0.5	0.9	0.7	0.8	0.96225	0.0377496	0.894427	0.333333	0.942809	0.333333	0.0377496	0	1.42309	0.0377496	-5	-0.25	0.75	-0.415037	-5
TGON2_HUMAN	Trans-Golgi network integral membrane protein 2	TGOLN2	1	0	0	0	1.9	0	-0.284179	0.715821	-0.223607	1	-0.235702	1	0.715821	0	0.145196	0.715821	0.419172	0.45	1.9	0.925999	0.310345
ENOG_HUMAN	Gamma-enolase	ENO2	0	0	0	0	0	0												0
MTG2_HUMAN	Mitochondrial ribosome-associated GTPase 2	MTG2	1	1	0.9	1.1	1.4	1.5	-0.987878	0.0121217	-0.894427	0.333333	-0.942809	0.333333	0.0121217	0	1.91644	0.0121217	9	0.45	1.45	0.536053	9
BABA1_HUMAN	BRISC and BRCA1-A complex member 1	BABAM1	0	1	29.4	0	0	0	0.57735	0.42265	0.57735	1	0.57735	1	0.42265	0	0.374019	0.42265	-1	-0.5	0	65535	-1
CSTN1_HUMAN	Calsyntenin-1	CLSTN1	1	1	0.6	0	1.1	0.6	0.390567	0.609433	0	1	0	1	0.609433	0	0.215074	0.609433	-0.6	-0.15	0.85	-0.234465	-0.6
IGF2_HUMAN	Insulin-like growth factor II	IGF2	1	1	0.7	1.2	0.9	1.3	-0.333333	0.666667	0	1	0	1	0.666667	0	0.176091	0.666667	0.5	0.1	1.1	0.137504	0.5
AMPD2_HUMAN	AMP deaminase 2	AMPD2	0	0	0	0	0	0												0
PGCA_HUMAN	Aggrecan core protein	ACAN	1	1	0	0.7	1.5	0	0.229416	0.770584	0	1	0	1	0.770584	0	0.11318	0.770584	-0.333333	-0.25	0.75	-0.415037	-0.333333
FA49B_HUMAN	Protein FAM49B	FAM49B	0	0	0	0	0	0												0
LAMP1_HUMAN	Lysosome-associated membrane glycoprotein 1	LAMP1	1	1	0.5	0.8	0.8	1.4	-0.229416	0.770584	0	1	0	1	0.770584	0	0.11318	0.770584	0.333333	0.1	1.1	0.137504	0.333333
ICOSL_HUMAN	ICOS ligand	ICOSLG	1	1	0.6	0.6	0.9	0.8	0.904534	0.095466	0.894427	0.333333	0.942809	0.333333	0.095466	0	1.02015	0.095466	-3	-0.15	0.85	-0.234465	-3
NHRF1_HUMAN	Na(+)/H(+) exchange regulatory cofactor NHE-RF1	SLC9A3R1	0	1	100	1	100	0	-0.573463	0.426537	-0.223607	1	-0.235702	1	0.426537	0	0.370043	0.426537	0.989951	49.5	100	6.64386	0.980198
ROBO4_HUMAN	Roundabout homolog 4	ROBO4	1	0	1.2	0	1.4	0	-0.162221	0.837779	-0.223607	1	-0.235702	1	0.837779	0	0.0768707	0.837779	0.232495	0.2	1.4	0.485427	0.166667
KPYM_HUMAN	Pyruvate kinase PKM	PKM	1	0	0.8	0	0.7	0	0.171219	0.828781	0.223607	1	0.235702	1	0.828781	0	0.0815602	0.828781	-0.24577	-0.15	0.7	-0.514573	-0.176471
B3GN1_HUMAN	N-acetyllactosaminide beta-1,3-N-acetylglucosaminyltransferase	B3GNT1	1	0	1.3	0	1.7	0	-0.243414	0.756586	-0.223607	1	-0.235702	1	0.756586	0	0.121142	0.756586	0.354914	0.35	1.7	0.765535	0.259259
PTPRC_HUMAN	Receptor-type tyrosine-protein phosphatase C	PTPRC	0	1	0	0.8	0	0.9	0.0524864	0.947514	0.223607	1	0.235702	1	0.947514	0	0.0234145	0.947514	-0.0743294	-0.05	0.9	-0.152003	-0.0526316
IASPP_HUMAN	RelA-associated inhibitor	PPP1R13L	0	1	0	0	0	1.2	-0.090167	0.909833	-0.223607	1	-0.235702	1	0.909833	0	0.0410383	0.909833	0.128037	0.1	1.2	0.263034	0.0909091
MMP8_HUMAN	Neutrophil collagenase	MMP8	0	1	0	1.7	0	5.6	-0.496377	0.503623	-0.223607	1	-0.235702	1	0.503623	0	0.297895	0.503623	0.808637	2.3	5.6	2.48543	0.69697
G6PE_HUMAN	GDH/6PGL endoplasmic bifunctional protein	H6PD	1	1	1.3	1.2	1.3	1.1	-0.816497	0.183503	-0.894427	0.333333	-0.942809	0.333333	0.183503	0	0.736356	0.183503	2	0.2	1.2	0.263034	2
SAA2_HUMAN	Serum amyloid A-2 protein	SAA2	1	1	1.1	0.9	1.9	1.2	-0.743311	0.256689	-0.894427	0.333333	-0.942809	0.333333	0.256689	0	0.590593	0.256689	1.57143	0.55	1.55	0.632268	1.57143
TTHY_HUMAN	Transthyretin	TTR	1	1	0.3	0.4	0.4	0.6	0.96225	0.0377496	0.894427	0.333333	0.942809	0.333333	0.0377496	0	1.42309	0.0377496	-5	-0.5	0.5	-1	-5
PARK7_HUMAN	Protein DJ-1	PARK7	1	1	1	1.4	1.4	1.8	-0.904534	0.095466	-0.894427	0.333333	-0.942809	0.333333	0.095466	0	1.02015	0.095466	3	0.6	1.6	0.678072	3
SRGN_HUMAN	Serglycin	SRGN	1	1	0.7	0.6	0.8	0.9	0.904534	0.095466	0.894427	0.333333	0.942809	0.333333	0.095466	0	1.02015	0.095466	-3	-0.15	0.85	-0.234465	-3
ILF3_HUMAN	Interleukin enhancer-binding factor 3	ILF3	1	0	1.3	100	0	100	-0.573463	0.426537	-0.223607	1	-0.235702	1	0.426537	0	0.370043	0.426537	0.989951	49.5	100	6.64386	0.980198
S38AA_HUMAN	Putative sodium-coupled neutral amino acid transporter 10	SLC38A10	1	1.1	1.2	5.3	1.2	7.2	-0.596066	0.403934	-0.816497	0.333333	-0.894427	0.333333	0.403934	0	0.39369	0.403934	1.04985	3.15	4	2	1.03279
LSAMP_HUMAN	Limbic system-associated membrane protein	LSAMP	0	0	0	0	0	0												0
GGCT_HUMAN	Gamma-glutamylcyclotransferase	GGCT	0.2	0.7	12.7	6.5	13.3	10.8	-0.988138	0.011862	-0.816497	0.333333	-0.894427	0.333333	0.011862	0	1.92584	0.011862	9.09979	11.6	26.7778	4.74296	7.73333
MENT_HUMAN	Protein MENT	MENT	1	1.5	0.7	12.2	1	18.7	-0.566169	0.433831	-0.223607	1	-0.235702	1	0.433831	0	0.36268	0.433831	0.971364	8.6	7.88	2.9782	0.945055
RB11A_HUMAN (+1)	Ras-related protein Rab-11A	RAB11A	1	1	1	1.1	0.7	2.4	-0.416058	0.583942	0	1	0	1	0.583942	0	0.23363	0.583942	0.647059	0.55	1.55	0.632268	0.647059
LYVE1_HUMAN	Lymphatic vessel endothelial hyaluronic acid receptor 1	LYVE1	1	1	0.7	0.7	0.8	0.8	1	0	1	0.333333	1	0.333333	0	1	65535	0	65535	-0.2	0.8	-0.321928	65535
DMP4_HUMAN	Extracellular serine/threonine protein kinase FAM20C	FAM20C	0	1	0	0.9	0	1	0	1	0	1	0	1	1	0	0	1	0	0	1	0	0
ACTBL_HUMAN	Beta-actin-like protein 2	ACTBL2	1	0	0.7	0	1	0	0	1	0	1	0	1	1	0	0	1	0	0	1	0	0
MA2A1_HUMAN	Alpha-mannosidase 2	MAN2A1	0	1	0	1.8	0	0	0.57735	0.42265	0.57735	1	0.57735	1	0.42265	0	0.374019	0.42265	-1	-0.5	0	65535	-1
HNRPR_HUMAN	Heterogeneous nuclear ribonucleoprotein R	HNRNPR	0	0	0	0	0	0												0
ACE_HUMAN	Angiotensin-converting enzyme	ACE	1	0	1.1	0	0.9	0	0.0524864	0.947514	0.223607	1	0.235702	1	0.947514	0	0.0234145	0.947514	-0.0743294	-0.05	0.9	-0.152003	-0.0526316
LAMC1_HUMAN	Laminin subunit gamma-1	LAMC1	1	0	0.6	0	0.6	0	0.235702	0.764298	0.223607	1	0.235702	1	0.764298	0	0.116737	0.764298	-0.342997	-0.2	0.6	-0.736966	-0.25
AKA12_HUMAN	A-kinase anchor protein 12	AKAP12	0	0	0	0	0	0												0
KDIS_HUMAN	Kinase D-interacting substrate of 220 kDa	KIDINS220	1	0	0	0	1	0	0	1	0	1	0	1	1	0	0	1	0	0	1	0	0
CNN2_HUMAN	Calponin-2	CNN2	1	1	1.6	1	1.7	1.4	-0.933008	0.0669922	-0.894427	0.333333	-0.942809	0.333333	0.0669922	0	1.17398	0.0669922	3.66667	0.55	1.55	0.632268	3.66667
PSB1_HUMAN	Proteasome subunit beta type-1	PSMB1	1	1	1.1	1	0.5	0.7	0.942809	0.057191	0.894427	0.333333	0.942809	0.333333	0.057191	0	1.24267	0.057191	-4	-0.4	0.6	-0.736966	-4
OAF_HUMAN	Out at first protein homolog	OAF	1	1	0.8	1.5	0.6	1.9	-0.262432	0.737568	0	1	0	1	0.737568	0	0.132198	0.737568	0.384615	0.25	1.25	0.321928	0.384615
TSP4_HUMAN	Thrombospondin-4	THBS4	1	1	0.6	0.4	0.6	0.3	0.933008	0.0669922	0.894427	0.333333	0.942809	0.333333	0.0669922	0	1.17398	0.0669922	-3.66667	-0.55	0.45	-1.152	-3.66667
CMGA_HUMAN	Chromogranin-A	CHGA	1	0	0	0	0.9	0	0.0524864	0.947514	0.223607	1	0.235702	1	0.947514	0	0.0234145	0.947514	-0.0743294	-0.05	0.9	-0.152003	-0.0526316
PVRL1_HUMAN	Poliovirus receptor-related protein 1	PVRL1	1	1	0.8	0.6	1.3	0.9	-0.333333	0.666667	0	1	0	1	0.666667	0	0.176091	0.666667	0.5	0.1	1.1	0.137504	0.5
PSA1_HUMAN	Proteasome subunit alpha type-1	PSMA1	1	1	2.1	2.7	1.3	1.3	-1	0	-1	0.333333	-1	0.333333	0	1	65535	0	65535	0.3	1.3	0.378512	65535
ENDD1_HUMAN	Endonuclease domain-containing 1 protein	ENDOD1	0	1	0	0	0	1.2	-0.090167	0.909833	-0.223607	1	-0.235702	1	0.909833	0	0.0410383	0.909833	0.128037	0.1	1.2	0.263034	0.0909091
RINI_HUMAN	Ribonuclease inhibitor	RNH1	1	1	1.1	0.4	1	0.5	0.57735	0.42265	0.57735	1	0.57735	1	0.42265	0	0.374019	0.42265	-1	-0.25	0.75	-0.415037	-1
1433T_HUMAN	14-3-3 protein theta	YWHAQ	0.9	0	2.9	0	2.9	0	-0.4222	0.5778	-0.223607	1	-0.235702	1	0.5778	0	0.238223	0.5778	0.658665	1	3.22222	1.68806	0.526316
RAB7A_HUMAN	Ras-related protein Rab-7a	RAB7A	1	0	0.7	0	1.2	0	-0.090167	0.909833	-0.223607	1	-0.235702	1	0.909833	0	0.0410383	0.909833	0.128037	0.1	1.2	0.263034	0.0909091
FAT4_HUMAN	Protocadherin Fat 4	FAT4	0	0	0	0	0	0												0
NPM_HUMAN	Nucleophosmin	NPM1	0	1	0	1.3	0	1.5	-0.19245	0.80755	-0.223607	1	-0.235702	1	0.80755	0	0.0928306	0.80755	0.27735	0.25	1.5	0.584963	0.2
PIGO_HUMAN	GPI ethanolamine phosphate transferase 3	PIGO	0	1	0	1.1	0	3.6	-0.441503	0.558497	-0.223607	1	-0.235702	1	0.558497	0	0.252979	0.558497	0.695874	1.3	3.6	1.848	0.565217
DAG1_HUMAN	Dystroglycan	DAG1	1	0	0.6	0	1.2	0	-0.090167	0.909833	-0.223607	1	-0.235702	1	0.909833	0	0.0410383	0.909833	0.128037	0.1	1.2	0.263034	0.0909091
PSA7_HUMAN	Proteasome subunit alpha type-7	PSMA7	0	0.1	0	15.5	0	11.9	-0.574089	0.425911	-0.223607	1	-0.235702	1	0.425911	0	0.370681	0.425911	0.991562	5.9	119	6.89482	0.983333
DPP4_HUMAN	Dipeptidyl peptidase 4	DPP4	0	0.9	0	0.9	0	0.8	0.058621	0.941379	0.223607	1	0.235702	1	0.941379	0	0.0262355	0.941379	-0.0830455	-0.05	0.888889	-0.169925	-0.0588235
TSP2_HUMAN	Thrombospondin-2	THBS2	0	1	0	0.8	0	0.8	0.109764	0.890236	0.223607	1	0.235702	1	0.890236	0	0.050495	0.890236	-0.156174	-0.1	0.8	-0.321928	-0.111111
MICLK_HUMAN	MICAL C-terminal-like protein	MICALCL	0	1	0	0.8	0	1.1	-0.0475114	0.952489	-0.223607	1	-0.235702	1	0.952489	0	0.0211402	0.952489	0.0672673	0.05	1.1	0.137504	0.047619
TBA4A_HUMAN	Tubulin alpha-4A chain	TUBA4A	0	1	0	0.8	0	2	-0.301511	0.698489	-0.223607	1	-0.235702	1	0.698489	0	0.155841	0.698489	0.447214	0.5	2	1	0.333333
TCP4_HUMAN	Activated RNA polymerase II transcriptional coactivator p15	SUB1	0	0	0	0	0	0												0
PSB4_HUMAN	Proteasome subunit beta type-4	PSMB4	0	0	0	0	0	0												0
ETHE1_HUMAN	Persulfide dioxygenase ETHE1, mitochondrial	ETHE1	1	0	42.7	0	60.3	0	-0.570861	0.429139	-0.223607	1	-0.235702	1	0.429139	0	0.367402	0.429139	0.983281	29.65	60.3	5.91409	0.967374
SET_HUMAN	Protein SET	SET	0	0	0	0	0	0												0
SH3L1_HUMAN	SH3 domain-binding glutamic acid-rich-like protein	SH3BGRL	1	1	1.7	1.8	2.3	1.9	-0.968496	0.031504	-0.894427	0.333333	-0.942809	0.333333	0.031504	0	1.50163	0.031504	5.5	1.1	2.1	1.07039	5.5
TN13B_HUMAN	Tumor necrosis factor ligand superfamily member 13B	TNFSF13B	1	1	2.7	0.5	3	1.9	-0.881219	0.118781	-0.894427	0.333333	-0.942809	0.333333	0.118781	0	0.925252	0.118781	2.63636	1.45	2.45	1.29278	2.63636
ASC_HUMAN	Apoptosis-associated speck-like protein containing a CARD	PYCARD	0	0	0	0	0	0												0
MYLK_HUMAN	Myosin light chain kinase, smooth muscle	MYLK	1	0	0.7	100	1.3	100	-0.58352	0.41648	-0.816497	0.333333	-0.894427	0.333333	0.41648	0	0.380405	0.41648	1.01616	50.15	101.3	6.66249	1.00602
OSTP_HUMAN	Osteopontin	SPP1	1	1	1.8	0.9	1.5	0.4	0.06415	0.93585	0	1	0	1	0.93585	0	0.0287938	0.93585	-0.0909091	-0.05	0.95	-0.0740006	-0.0909091
IGF1_HUMAN	Insulin-like growth factor I	IGF1	1	1	0.9	0.9	1.1	0.9	-3.92523e-16	1	0	1	0	1	1	0	0	1	0	0	1	0	0
TCTP_HUMAN	Translationally-controlled tumor protein	TPT1	1	1	0.7	1.3	0.9	2.3	-0.518321	0.481679	0	1	0	1	0.481679	0	0.317242	0.481679	0.857143	0.6	1.6	0.678072	0.857143
ML12A_HUMAN (+1)	Myosin regulatory light chain 12A	MYL12A	0	1	73.6	0.7	0	1.4	-0.162221	0.837779	-0.223607	1	-0.235702	1	0.837779	0	0.0768707	0.837779	0.232495	0.2	1.4	0.485427	0.166667
FKB1A_HUMAN	Peptidyl-prolyl cis-trans isomerase FKBP1A	FKBP1A	1	1	1.5	1.4	1.5	1.4	-0.987878	0.0121217	-0.894427	0.333333	-0.942809	0.333333	0.0121217	0	1.91644	0.0121217	9	0.45	1.45	0.536053	9
TIMP1_HUMAN	Metalloproteinase inhibitor 1	TIMP1	1	1	1	0.6	1	0.7	0.57735	0.42265	0.57735	1	0.57735	1	0.42265	0	0.374019	0.42265	-1	-0.15	0.85	-0.234465	-1
NOTC1_HUMAN	Neurogenic locus notch homolog protein 1	NOTCH1	1	0	1.1	0	1	0	0	1	0	1	0	1	1	0	0	1	0	0	1	0	0
TPM2_HUMAN	Tropomyosin beta chain	TPM2	0	1	0	0	0	0.9	0.0524864	0.947514	0.223607	1	0.235702	1	0.947514	0	0.0234145	0.947514	-0.0743294	-0.05	0.9	-0.152003	-0.0526316
FUCO_HUMAN	Tissue alpha-L-fucosidase	FUCA1	1	1	0.4	0.9	0.9	1.2	-0.229416	0.770584	0	1	0	1	0.770584	0	0.11318	0.770584	0.333333	0.05	1.05	0.0703893	0.333333
IBP6_HUMAN	Insulin-like growth factor-binding protein 6	IGFBP6	0.8	0.7	1	1	1.3	1	-0.872872	0.127128	-0.816497	0.333333	-0.894427	0.333333	0.127128	0	0.895757	0.127128	2.52982	0.4	1.53333	0.616671	2
EP15R_HUMAN	Epidermal growth factor receptor substrate 15-like 1	EPS15L1	0	0	0	0	0	0												0
PLXA2_HUMAN	Plexin-A2	PLXNA2	0	0	0	0	0	0												0
CSRP1_HUMAN	Cysteine and glycine-rich protein 1	CSRP1	1	0	0.8	0	1.6	0	-0.219382	0.780618	-0.223607	1	-0.235702	1	0.780618	0	0.107561	0.780618	0.317999	0.3	1.6	0.678072	0.230769
PDLI1_HUMAN	PDZ and LIM domain protein 1	PDLIM1	0	1	0	0.8	0	1.5	-0.19245	0.80755	-0.223607	1	-0.235702	1	0.80755	0	0.0928306	0.80755	0.27735	0.25	1.5	0.584963	0.2
PSA5_HUMAN	Proteasome subunit alpha type-5	PSMA5	0	1	0	0.9	0	0	0.57735	0.42265	0.57735	1	0.57735	1	0.42265	0	0.374019	0.42265	-1	-0.5	0	65535	-1
RSBNL_HUMAN	Round spermatid basic protein 1-like protein	RSBN1L	0	0	0	0	0	0												0
A1AG1_HUMAN	Alpha-1-acid glycoprotein 1	ORM1	1	0	0.4	0	0.6	0	0.235702	0.764298	0.223607	1	0.235702	1	0.764298	0	0.116737	0.764298	-0.342997	-0.2	0.6	-0.736966	-0.25
LMAN2_HUMAN	Vesicular integral-membrane protein VIP36	LMAN2	0	1	0	0	0	0	0.57735	0.42265	0.57735	1	0.57735	1	0.42265	0	0.374019	0.42265	-1	-0.5	0	65535	-1
DPB1_HUMAN	HLA class II histocompatibility antigen, DP beta 1 chain	HLA-DPB1	1	0	0.9	0	0	0	0.57735	0.42265	0.57735	1	0.57735	1	0.42265	0	0.374019	0.42265	-1	-0.5	0	65535	-1
SF3B2_HUMAN	Splicing factor 3B subunit 2	SF3B2	0	1	0	0.8	0	0	0.57735	0.42265	0.57735	1	0.57735	1	0.42265	0	0.374019	0.42265	-1	-0.5	0	65535	-1
IF122_HUMAN	Intraflagellar transport protein 122 homolog	IFT122	1	0	1.6	0	1.5	0	-0.19245	0.80755	-0.223607	1	-0.235702	1	0.80755	0	0.0928306	0.80755	0.27735	0.25	1.5	0.584963	0.2
PSA4_HUMAN	Proteasome subunit alpha type-4	PSMA4	0	0	0	0	0	0												0
RB15B_HUMAN	Putative RNA-binding protein 15B	RBM15B	0	0	0	0	0	0												0
GLPK2_HUMAN	Glycerol kinase 2	GK2	0	0	0	0	0	0												0
VAC14_HUMAN	Protein VAC14 homolog	VAC14	1	0	0	0	1.2	0	-0.090167	0.909833	-0.223607	1	-0.235702	1	0.909833	0	0.0410383	0.909833	0.128037	0.1	1.2	0.263034	0.0909091
CR3L3_HUMAN	Cyclic AMP-responsive element-binding protein 3-like protein 3	CREB3L3	0	1	100	1.8	100	1.1	-0.581973	0.418027	-0.816497	0.333333	-0.894427	0.333333	0.418027	0	0.378795	0.418027	1.01208	50.05	101.1	6.65964	1.002
RD23B_HUMAN	UV excision repair protein RAD23 homolog B	RAD23B	1	1	1.6	1.1	1	1.2	-0.57735	0.42265	-0.57735	1	-0.57735	1	0.42265	0	0.374019	0.42265	1	0.1	1.1	0.137504	1
SNX3_HUMAN	Sorting nexin-3	SNX3	0	0	0	0	0	0												0
IGJ_HUMAN	Immunoglobulin J chain	IGJ	1	0	0.6	22.1	0.8	47.4	-0.582186	0.417814	-0.408248	0.666667	-0.447214	0.666667	0.417814	0	0.379017	0.417814	1.01264	23.6	48.2	5.59096	0.991597
IGKC_HUMAN	Ig kappa chain C region	IGKC	1	1	0.7	1.2	1.7	2.8	-0.849045	0.150955	-0.894427	0.333333	-0.942809	0.333333	0.150955	0	0.821151	0.150955	2.27273	1.25	2.25	1.16993	2.27273
KCY_HUMAN	UMP-CMP kinase	CMPK1	0	1	0	0.7	0	1	0	1	0	1	0	1	1	0	0	1	0	0	1	0	0
GAPR1_HUMAN	Golgi-associated plant pathogenesis-related protein 1	GLIPR2	1	0	0.9	0	0.7	0	0.171219	0.828781	0.223607	1	0.235702	1	0.828781	0	0.0815602	0.828781	-0.24577	-0.15	0.7	-0.514573	-0.176471
SBP1_HUMAN	Selenium-binding protein 1	SELENBP1	0	1	0	0	0	0	0.57735	0.42265	0.57735	1	0.57735	1	0.42265	0	0.374019	0.42265	-1	-0.5	0	65535	-1
CP46A_HUMAN	Cholesterol 24-hydroxylase	CYP46A1	0	1	0	1	0	0.7	0.171219	0.828781	0.223607	1	0.235702	1	0.828781	0	0.0815602	0.828781	-0.24577	-0.15	0.7	-0.514573	-0.176471
GLO2_HUMAN	Hydroxyacylglutathione hydrolase, mitochondrial	HAGH	0	1	0	1.2	0	1.2	-0.090167	0.909833	-0.223607	1	-0.235702	1	0.909833	0	0.0410383	0.909833	0.128037	0.1	1.2	0.263034	0.0909091
CQ105_HUMAN	Uncharacterized protein C17orf105	C17orf105	0	0	0	0	0	0												0
PIGR_HUMAN	Polymeric immunoglobulin receptor	PIGR	0.2	0	5.6	0	0	0	0.57735	0.42265	0.57735	1	0.57735	1	0.42265	0	0.374019	0.42265	-1	-0.1	0	65535	-1
CLIC1_HUMAN	Chloride intracellular channel protein 1	CLIC1	1	0	2.6	0	3.2	0	-0.420903	0.579097	-0.223607	1	-0.235702	1	0.579097	0	0.237249	0.579097	0.656205	1.1	3.2	1.67807	0.52381
CD109_HUMAN	CD109 antigen	CD109	1	0	2.3	0	3.7	0	-0.44587	0.55413	-0.223607	1	-0.235702	1	0.55413	0	0.256388	0.55413	0.704454	1.35	3.7	1.88753	0.574468
TBB8L_HUMAN	Tubulin beta-8 chain-like protein LOC260334		0	1	0	1.8	0	1.6	-0.219382	0.780618	-0.223607	1	-0.235702	1	0.780618	0	0.107561	0.780618	0.317999	0.3	1.6	0.678072	0.230769
DPEP2_HUMAN	Dipeptidase 2	DPEP2	0	1	0	0.4	0	1	0	1	0	1	0	1	1	0	0	1	0	0	1	0	0
B3GN2_HUMAN	UDP-GlcNAc:betaGal beta-1,3-N-acetylglucosaminyltransferase 2	B3GNT2	1	0	0.9	0	0.8	0	0.109764	0.890236	0.223607	1	0.235702	1	0.890236	0	0.050495	0.890236	-0.156174	-0.1	0.8	-0.321928	-0.111111
PYGL_HUMAN	Glycogen phosphorylase, liver form	PYGL	0	0	0	0	0	0												0
LEUK_HUMAN	Leukosialin	SPN	0	0	0	0	0	0												0
CNPY2_HUMAN	Protein canopy homolog 2	CNPY2	0	0	0	0	0	0												0
ATF6B_HUMAN	Cyclic AMP-dependent transcription factor ATF-6 beta	ATF6B	1	0	0.5	0	0.9	0	0.0524864	0.947514	0.223607	1	0.235702	1	0.947514	0	0.0234145	0.947514	-0.0743294	-0.05	0.9	-0.152003	-0.0526316
CO1A2_HUMAN	Collagen alpha-2(I) chain	COL1A2	0	1	0	0.9	0	1.6	-0.219382	0.780618	-0.223607	1	-0.235702	1	0.780618	0	0.107561	0.780618	0.317999	0.3	1.6	0.678072	0.230769
PCD18_HUMAN	Protocadherin-18	PCDH18	1	0	0.6	0	1	0	0	1	0	1	0	1	1	0	0	1	0	0	1	0	0
GOLI4_HUMAN	Golgi integral membrane protein 4	GOLIM4	0	1	0	1.2	0	1.1	-0.0475114	0.952489	-0.223607	1	-0.235702	1	0.952489	0	0.0211402	0.952489	0.0672673	0.05	1.1	0.137504	0.047619
K0947_HUMAN	Uncharacterized protein KIAA0947	KIAA0947	0	0	0	0	0	0												0
TULP4_HUMAN	Tubby-related protein 4	TULP4	0	0	0	0	0	0												0
IBP4_HUMAN	Insulin-like growth factor-binding protein 4	IGFBP4	1	1	0.9	0.5	1.4	0.5	0.078326	0.921674	0	1	0	1	0.921674	0	0.0354227	0.921674	-0.111111	-0.05	0.95	-0.0740006	-0.111111
APEX1_HUMAN	DNA-(apurinic or apyrimidinic site) lyase	APEX1	0	0	0	0	0	0												0
CUTA_HUMAN	Protein CutA	CUTA	1	1	1.5	0.6	0.7	0.5	0.942809	0.057191	0.894427	0.333333	0.942809	0.333333	0.057191	0	1.24267	0.057191	-4	-0.4	0.6	-0.736966	-4
ABRAL_HUMAN	Costars family protein ABRACL	ABRACL	1	0	0.8	100	0.7	0	0.171219	0.828781	0.223607	1	0.235702	1	0.828781	0	0.0815602	0.828781	-0.24577	-0.15	0.7	-0.514573	-0.176471
G3BP1_HUMAN	Ras GTPase-activating protein-binding protein 1	G3BP1	0	0	0	0	0	0												0
LEG1_HUMAN	Galectin-1	LGALS1	1	1	0.8	0.6	0.6	0.3	0.933008	0.0669922	0.894427	0.333333	0.942809	0.333333	0.0669922	0	1.17398	0.0669922	-3.66667	-0.55	0.45	-1.152	-3.66667
AN32A_HUMAN	Acidic leucine-rich nuclear phosphoprotein 32 family member A	ANP32A	0	0	0	0	0	0												0
MMP2_HUMAN	72 kDa type IV collagenase	MMP2	1	0	0.8	0	0.9	0	0.0524864	0.947514	0.223607	1	0.235702	1	0.947514	0	0.0234145	0.947514	-0.0743294	-0.05	0.9	-0.152003	-0.0526316
CD5L_HUMAN	CD5 antigen-like	CD5L	1	0	1.3	0	1.4	0	-0.162221	0.837779	-0.223607	1	-0.235702	1	0.837779	0	0.0768707	0.837779	0.232495	0.2	1.4	0.485427	0.166667
PLEK_HUMAN	Pleckstrin	PLEK	1	0	0.8	0	1.2	0	-0.090167	0.909833	-0.223607	1	-0.235702	1	0.909833	0	0.0410383	0.909833	0.128037	0.1	1.2	0.263034	0.0909091
ACBP_HUMAN	Acyl-CoA-binding protein	DBI	0	0	0	0	0	0												0
TIE1_HUMAN	Tyrosine-protein kinase receptor Tie-1	TIE1	0	1	0	1.5	0	1.9	-0.284179	0.715821	-0.223607	1	-0.235702	1	0.715821	0	0.145196	0.715821	0.419172	0.45	1.9	0.925999	0.310345
GRN_HUMAN	Granulins	GRN	1	0	1.5	0	1.6	0	-0.219382	0.780618	-0.223607	1	-0.235702	1	0.780618	0	0.107561	0.780618	0.317999	0.3	1.6	0.678072	0.230769
CH3L1_HUMAN	Chitinase-3-like protein 1	CHI3L1	1	0	1.2	0	1.4	0	-0.162221	0.837779	-0.223607	1	-0.235702	1	0.837779	0	0.0768707	0.837779	0.232495	0.2	1.4	0.485427	0.166667
UFO_HUMAN	Tyrosine-protein kinase receptor UFO	AXL	0	1	0	0.7	0	1	0	1	0	1	0	1	1	0	0	1	0	0	1	0	0
OIT3_HUMAN	Oncoprotein-induced transcript 3 protein	OIT3	0	1	0	0.7	0	0.8	0.109764	0.890236	0.223607	1	0.235702	1	0.890236	0	0.050495	0.890236	-0.156174	-0.1	0.8	-0.321928	-0.111111
CALU_HUMAN	Calumenin	CALU	1	0	1	0	0.9	0	0.0524864	0.947514	0.223607	1	0.235702	1	0.947514	0	0.0234145	0.947514	-0.0743294	-0.05	0.9	-0.152003	-0.0526316
FSCN1_HUMAN	Fascin	FSCN1	1	0	0	0	0	0	0.57735	0.42265	0.57735	1	0.57735	1	0.42265	0	0.374019	0.42265	-1	-0.5	0	65535	-1
DJC21_HUMAN	DnaJ homolog subfamily C member 21	DNAJC21	0	0	0	0	0	0												0
SNED1_HUMAN	Sushi, nidogen and EGF-like domain-containing protein 1	SNED1	1	0	0.8	0	1.5	0	-0.19245	0.80755	-0.223607	1	-0.235702	1	0.80755	0	0.0928306	0.80755	0.27735	0.25	1.5	0.584963	0.2
PSB8_HUMAN	Proteasome subunit beta type-8	PSMB8	1	0	1.1	0	1.7	0	-0.243414	0.756586	-0.223607	1	-0.235702	1	0.756586	0	0.121142	0.756586	0.354914	0.35	1.7	0.765535	0.259259
APMAP_HUMAN	Adipocyte plasma membrane-associated protein	APMAP	0	1	0	1.9	0	3	-0.408248	0.591752	-0.223607	1	-0.235702	1	0.591752	0	0.22786	0.591752	0.632456	1	3	1.58496	0.5
PDIA3_HUMAN	Protein disulfide-isomerase A3	PDIA3	0	0	0	0	0	0												0
HMGN2_HUMAN	Non-histone chromosomal protein HMG-17	HMGN2	0	0	0	0	0	0												0
CAMP_HUMAN	Cathelicidin antimicrobial peptide	CAMP	1	0	1.9	0	2.2	0	-0.331295	0.668705	-0.223607	1	-0.235702	1	0.668705	0	0.174765	0.668705	0.496564	0.6	2.2	1.1375	0.375
SYTL4_HUMAN	Synaptotagmin-like protein 4	SYTL4	0	0	0	0	0	0												0
SRP54_HUMAN	Signal recognition particle 54 kDa protein	SRP54	1	0	0.5	0	0	0	0.57735	0.42265	0.57735	1	0.57735	1	0.42265	0	0.374019	0.42265	-1	-0.5	0	65535	-1
NEXN_HUMAN	Nexilin	NEXN	1	0	1.1	0	1	0	0	1	0	1	0	1	1	0	0	1	0	0	1	0	0
A1AT_HUMAN	Alpha-1-antitrypsin	SERPINA1	1	0	1.3	0	1.4	0	-0.162221	0.837779	-0.223607	1	-0.235702	1	0.837779	0	0.0768707	0.837779	0.232495	0.2	1.4	0.485427	0.166667
RAB14_HUMAN	Ras-related protein Rab-14	RAB14	1	1	1	1.1	1	1.3	-0.57735	0.42265	-0.57735	1	-0.57735	1	0.42265	0	0.374019	0.42265	1	0.15	1.15	0.201634	1
LIRA3_HUMAN	Leukocyte immunoglobulin-like receptor subfamily A member 3	LILRA3	1	1	1.4	1.2	2	0.9	-0.500773	0.499227	0	1	0	1	0.499227	0	0.301702	0.499227	0.818182	0.45	1.45	0.536053	0.818182
CADH2_HUMAN	Cadherin-2	CDH2	0	1	0	0.4	0	1.6	-0.219382	0.780618	-0.223607	1	-0.235702	1	0.780618	0	0.107561	0.780618	0.317999	0.3	1.6	0.678072	0.230769
EPCR_HUMAN	Endothelial protein C receptor	PROCR	0	1	0	1	0	1.5	-0.19245	0.80755	-0.223607	1	-0.235702	1	0.80755	0	0.0928306	0.80755	0.27735	0.25	1.5	0.584963	0.2
MIF_HUMAN	Macrophage migration inhibitory factor	MIF	1	0	1	0	0.4	0	0.366508	0.633492	0.223607	1	0.235702	1	0.633492	0	0.198259	0.633492	-0.557086	-0.3	0.4	-1.32193	-0.428571
CYTB_HUMAN	Cystatin-B	CSTB	0	1	0	1.2	0	0	0.57735	0.42265	0.57735	1	0.57735	1	0.42265	0	0.374019	0.42265	-1	-0.5	0	65535	-1
CD97_HUMAN	CD97 antigen	CD97	0	0	0	0	0	0												0
KLD10_HUMAN	Kelch domain-containing protein 10	KLHDC10	1	0	0.7	0	1.3	0	-0.128271	0.871729	-0.223607	1	-0.235702	1	0.871729	0	0.0596184	0.871729	0.182913	0.15	1.3	0.378512	0.130435
H15_HUMAN	Histone H1.5	HIST1H1B	0	1	0	1.1	0	1.8	-0.264906	0.735094	-0.223607	1	-0.235702	1	0.735094	0	0.133657	0.735094	0.388514	0.4	1.8	0.847997	0.285714
AMY1_HUMAN (+2)	Alpha-amylase 1	AMY1A	0	1	0	1.1	0	1	0	1	0	1	0	1	1	0	0	1	0	0	1	0	0
DEN5B_HUMAN	DENN domain-containing protein 5B	DENND5B	0	0	0	0	0	0												0
RNAS2_HUMAN	Non-secretory ribonuclease	RNASE2	1	0	0.8	0	0.9	0	0.0524864	0.947514	0.223607	1	0.235702	1	0.947514	0	0.0234145	0.947514	-0.0743294	-0.05	0.9	-0.152003	-0.0526316
GSH1_HUMAN	Glutamate--cysteine ligase catalytic subunit	GCLC	1	0	0.7	0	1.3	0	-0.128271	0.871729	-0.223607	1	-0.235702	1	0.871729	0	0.0596184	0.871729	0.182913	0.15	1.3	0.378512	0.130435
HNRH2_HUMAN	Heterogeneous nuclear ribonucleoprotein H2	HNRNPH2	1	0	0.6	0	0.6	0	0.235702	0.764298	0.223607	1	0.235702	1	0.764298	0	0.116737	0.764298	-0.342997	-0.2	0.6	-0.736966	-0.25
PSA6_HUMAN	Proteasome subunit alpha type-6	PSMA6	0	1	0	0.9	0	1.6	-0.219382	0.780618	-0.223607	1	-0.235702	1	0.780618	0	0.107561	0.780618	0.317999	0.3	1.6	0.678072	0.230769
BFSP1_HUMAN	Filensin	BFSP1	1	0	0.8	0	1.3	0	-0.128271	0.871729	-0.223607	1	-0.235702	1	0.871729	0	0.0596184	0.871729	0.182913	0.15	1.3	0.378512	0.130435
GSHR_HUMAN	Glutathione reductase, mitochondrial	GSR	0	1	0	1.6	0	2.8	-0.393543	0.606457	-0.223607	1	-0.235702	1	0.606457	0	0.2172	0.606457	0.605406	0.9	2.8	1.48543	0.473684
PTMA_HUMAN	Prothymosin alpha	PTMA	1	0	0.9	0	0	0	0.57735	0.42265	0.57735	1	0.57735	1	0.42265	0	0.374019	0.42265	-1	-0.5	0	65535	-1
QSOX2_HUMAN	Sulfhydryl oxidase 2	QSOX2	1	0	0.7	0	1.3	0	-0.128271	0.871729	-0.223607	1	-0.235702	1	0.871729	0	0.0596184	0.871729	0.182913	0.15	1.3	0.378512	0.130435
I11RA_HUMAN	Interleukin-11 receptor subunit alpha	IL11RA	1	0	0.3	0	1.9	0	-0.284179	0.715821	-0.223607	1	-0.235702	1	0.715821	0	0.145196	0.715821	0.419172	0.45	1.9	0.925999	0.310345
TRPV6_HUMAN	Transient receptor potential cation channel subfamily V member 6	TRPV6	1	0	1	0	1	0	0	1	0	1	0	1	1	0	0	1	0	0	1	0	0
FHR3_HUMAN	Complement factor H-related protein 3	CFHR3	0	1	0	2.1	0	2.8	-0.393543	0.606457	-0.223607	1	-0.235702	1	0.606457	0	0.2172	0.606457	0.605406	0.9	2.8	1.48543	0.473684
LYAM3_HUMAN	P-selectin	SELP	0	1	0	0.6	0	0.9	0.0524864	0.947514	0.223607	1	0.235702	1	0.947514	0	0.0234145	0.947514	-0.0743294	-0.05	0.9	-0.152003	-0.0526316
GMFG_HUMAN	Glia maturation factor gamma	GMFG	1	0	0.4	0	0.8	0	0.109764	0.890236	0.223607	1	0.235702	1	0.890236	0	0.050495	0.890236	-0.156174	-0.1	0.8	-0.321928	-0.111111
MGAT1_HUMAN	Alpha-1,3-mannosyl-glycoprotein 2-beta-N-acetylglucosaminyltransferase	MGAT1	0	0	0	0	0	0												0
ANGL3_HUMAN	Angiopoietin-related protein 3	ANGPTL3	0	1	0	0.9	0	0.7	0.171219	0.828781	0.223607	1	0.235702	1	0.828781	0	0.0815602	0.828781	-0.24577	-0.15	0.7	-0.514573	-0.176471
IBP7_HUMAN	Insulin-like growth factor-binding protein 7	IGFBP7	1	0	1.2	0	0	0	0.57735	0.42265	0.57735	1	0.57735	1	0.42265	0	0.374019	0.42265	-1	-0.5	0	65535	-1
PON3_HUMAN	Serum paraoxonase/lactonase 3	PON3	1	0	0.8	0	1.8	0	-0.264906	0.735094	-0.223607	1	-0.235702	1	0.735094	0	0.133657	0.735094	0.388514	0.4	1.8	0.847997	0.285714
RANG_HUMAN	Ran-specific GTPase-activating protein	RANBP1	0	1	0	0.9	0	0.8	0.109764	0.890236	0.223607	1	0.235702	1	0.890236	0	0.050495	0.890236	-0.156174	-0.1	0.8	-0.321928	-0.111111
TFPI1_HUMAN	Tissue factor pathway inhibitor	TFPI	1	0	1.1	0	0.8	0	0.109764	0.890236	0.223607	1	0.235702	1	0.890236	0	0.050495	0.890236	-0.156174	-0.1	0.8	-0.321928	-0.111111
FRIL_HUMAN	Ferritin light chain	FTL	0	0	0	0	0	0												0
ATL2_HUMAN	ADAMTS-like protein 2	ADAMTSL2	1	0	1	0	0	0	0.57735	0.42265	0.57735	1	0.57735	1	0.42265	0	0.374019	0.42265	-1	-0.5	0	65535	-1
ASGR2_HUMAN	Asialoglycoprotein receptor 2	ASGR2	1	0	1	0	1.6	0	-0.219382	0.780618	-0.223607	1	-0.235702	1	0.780618	0	0.107561	0.780618	0.317999	0.3	1.6	0.678072	0.230769
DUT_HUMAN	Deoxyuridine 5'-triphosphate nucleotidohydrolase, mitochondrial	DUT	1	0	0	0	0	0	0.57735	0.42265	0.57735	1	0.57735	1	0.42265	0	0.374019	0.42265	-1	-0.5	0	65535	-1
CR2_HUMAN	Complement receptor type 2	CR2	1	0	0.6	0	0.4	0	0.366508	0.633492	0.223607	1	0.235702	1	0.633492	0	0.198259	0.633492	-0.557086	-0.3	0.4	-1.32193	-0.428571
FA7_HUMAN	Coagulation factor VII	F7	0	1	0	0.4	0	1	0	1	0	1	0	1	1	0	0	1	0	0	1	0	0

## Sheet: Protein
UP_ID	ProteinName	GeneName	A1	B1	A2	B2	A3	B3	MW	Peptide Length	PI	Hydrophobicity	Buried Propensity	Net Charge	Average Net Charge	Total Positive Charge	AverageTotal Positive Charge	α-Helix Sum	α-Helix Freq	β-Sheet Sum	β-Sheet Freq	β-Turn Sum	β-Turn Freq	A	C	D	E	F	G	H	I	K	L	M	N	P	Q	R	S	T	V	W	Y	ACC	GeneName	Organism	Function	Subunit	Interaction
1433B_HUMAN	14-3-3 protein beta/alpha	YWHAB							28064.4	246	4.47197	2.0263	0.515732	-13.8635	-0.0569106	32	0.130081	264.46	1.07504	233.54	0.94935	245.9	0.999593	0.0853659	0.00813008	0.0569106	0.121951	0.0243902	0.0406504	0.00813008	0.0406504	0.0813008	0.097561	0.0325203	0.0569106	0.0203252	0.0609756	0.0406504	0.0772358	0.0487805	0.0447154	0.00813008	0.0447154	P31946	YWHAB	Homo sapiens (Human).	Adapter protein implicated in the regulation of a large spectrum of both general and specialized signaling pathways. Binds to a large number of partners, usually by recognition of a phosphoserine or phosphothreonine motif. Binding generally results in the modulation of the activity of the binding partner. Negative regulator of osteogenesis. Blocks the nuclear translocation of the phosphorylated f…	Homodimer. Interacts with SAMSN1 and PRKCE (By similarity). Interacts with SSH1 and TORC2/CRTC2. Interacts with ABL1; the interaction results in cytoplasmic location of ABL1 and inhibition of cABL-mediated apoptosis. Interacts with ROR2 (dimer); the interaction results in phosphorylation of YWHAB on tyrosine residues. Interacts with GAB2 and YAP1 (phosphorylated form). Interacts with the phosphor…	Q76353:- (xeno); NbExp=3; IntAct=EBI-359815, EBI-6248077; Q9P0K1-3:ADAM22; NbExp=2; IntAct=EBI-359815, EBI-1567267; P15056:BRAF; NbExp=3; IntAct=EBI-359815, EBI-365980; P22681:CBL; NbExp=3; IntAct=EBI-359815, EBI-518228; O00257:CBX4; NbExp=2; IntAct=EBI-359815, EBI-722425; P30304:CDC25A; NbExp=8; IntAct=EBI-359815, EBI-747671; P30305:CDC25B; NbExp=4; IntAct=EBI-359815, EBI-1051746; O94921:CDK14; …
1433E_HUMAN	14-3-3 protein epsilon	YWHAE							29155	255	4.36297	2.08055	0.530353	-18.8137	-0.0745098	35	0.137255	277.28	1.08737	244	0.956863	250.16	0.98102	0.0980392	0.0117647	0.0862745	0.113725	0.0196078	0.0392157	0.0117647	0.0509804	0.0705882	0.105882	0.0392157	0.0431373	0.0196078	0.0352941	0.054902	0.054902	0.0392157	0.0509804	0.00784314	0.0470588	Q7M4R4	YWHAE	Homo sapiens (Human).	Adapter protein implicated in the regulation of a large spectrum of both general and specialized signaling pathways. Binds to a large number of partners, usually by recognition of a phosphoserine or phosphothreonine motif. Binding generally results in the modulation of the activity of the binding partner.	Homodimer. Heterodimerizes with YWHAZ. Interacts with NDEL1, ARHGEF28 and TIAM2 (By similarity). Interacts with HCV core protein. Interacts with ABL1 (phosphorylated form); the interaction retains it in the cytoplasm. Weakly interacts with CDKN1B. Interacts with GAB2. Interacts with phosphorylated GRB10. Interacts with PKA-phosphorylated AANAT. Interacts with the phosphorylated (by AKT1) form of …	O92972:- (xeno); NbExp=5; IntAct=EBI-356498, EBI-9213553; O14727:APAF1; NbExp=2; IntAct=EBI-356498, EBI-446492; O00257-3:CBX4; NbExp=2; IntAct=EBI-356498, EBI-4392727; O94921:CDK14; NbExp=3; IntAct=EBI-356498, EBI-1043945; Q9UKT5:FBXO4; NbExp=5; IntAct=EBI-356498, EBI-960409; P56524:HDAC4; NbExp=4; IntAct=EBI-356498, EBI-308629; Q14678-2:KANK1; NbExp=3; IntAct=EBI-356498, EBI-6173812; Q5S007:LRRK…
1433G_HUMAN	14-3-3 protein gamma	YWHAG	1	1	1.5	2.1	2.3	3	28284.4	247	4.5235	2.05356	0.523765	-14.7298	-0.0607287	34	0.137652	264.3	1.07004	238.31	0.964818	245.59	0.994291	0.0931174	0.0121457	0.0688259	0.11336	0.0121457	0.0323887	0.0161943	0.0404858	0.0688259	0.097166	0.0283401	0.0566802	0.0161943	0.048583	0.0526316	0.0728745	0.0445344	0.0607287	0.00809717	0.0566802	P61981	YWHAG	Homo sapiens (Human).	Adapter protein implicated in the regulation of a large spectrum of both general and specialized signaling pathways. Binds to a large number of partners, usually by recognition of a phosphoserine or phosphothreonine motif. Binding generally results in the modulation of the activity of the binding partner.	Homodimer. Interacts with SAMSN1 (By similarity). Interacts with RAF1, SSH1 and CRTC2/TORC2. Interacts with ABL1 (phosphorylated form); the interaction retains it in the cytoplasm. Interacts with GAB2. Interacts with MDM4 (phosphorylated); negatively regulates MDM4 activity toward TP53. Interacts with PKA-phosphorylated AANAT.	O14757:CHEK1; NbExp=7; IntAct=EBI-359832, EBI-974488; P67828:CSNK1A1 (xeno); NbExp=3; IntAct=EBI-359832, EBI-7540603; P56524:HDAC4; NbExp=3; IntAct=EBI-359832, EBI-308629; Q14678-2:KANK1; NbExp=3; IntAct=EBI-359832, EBI-6173812; Q5S007:LRRK2; NbExp=3; IntAct=EBI-359832, EBI-5323863; Q7KZI7:MARK2; NbExp=2; IntAct=EBI-359832, EBI-516560; P27448:MARK3; NbExp=2; IntAct=EBI-359832, EBI-707595; O15151:…
1433T_HUMAN	14-3-3 protein theta	YWHAQ	0.9		2.9		2.9		27746.5	245	4.40632	2.0022	0.525347	-14.0924	-0.0571429	31	0.126531	262.45	1.07122	236.83	0.966653	241.59	0.986082	0.0979592	0.0204082	0.0734694	0.106122	0.0244898	0.0367347	0.00408163	0.0489796	0.077551	0.110204	0.0244898	0.0489796	0.0163265	0.0408163	0.044898	0.0653061	0.0653061	0.0408163	0.00816327	0.044898	P27348	YWHAQ	Homo sapiens (Human).	Adapter protein implicated in the regulation of a large spectrum of both general and specialized signaling pathways. Binds to a large number of partners, usually by recognition of a phosphoserine or phosphothreonine motif. Binding generally results in the modulation of the activity of the binding partner. Negatively regulates the kinase activity of PDPK1.	Homodimer. Interacts with CDK16 (By similarity). Interacts with SSH1. Interacts with CDKN1B ('Thr-198' phosphorylated form); the interaction translocates CDKN1B to the cytoplasm. Interacts with GAB2. Interacts with the 'Ser-241' phosphorylated form of PDPK1.	Q9P0K1-3:ADAM22; NbExp=2; IntAct=EBI-359854, EBI-1567267; P49407:ARRB1; NbExp=3; IntAct=EBI-359854, EBI-743313; P32121:ARRB2; NbExp=3; IntAct=EBI-359854, EBI-714559; P22681:CBL; NbExp=6; IntAct=EBI-359854, EBI-518228; O94921:CDK14; NbExp=3; IntAct=EBI-359854, EBI-1043945; P46527:CDKN1B; NbExp=4; IntAct=EBI-359854, EBI-519280; P67828:CSNK1A1 (xeno); NbExp=2; IntAct=EBI-359854, EBI-7540603; P00533:…
1433Z_HUMAN	14-3-3 protein zeta/delta	YWHAZ	0.4	0.4	1.6	1.6	1.6	1.4	27727.4	245	4.43462	2.03204	0.519061	-13.9984	-0.0571429	32	0.130612	265.99	1.08567	232.46	0.948816	242.63	0.990327	0.102041	0.0122449	0.0612245	0.122449	0.0244898	0.044898	0.00408163	0.0408163	0.0816327	0.0979592	0.0285714	0.0408163	0.0163265	0.0571429	0.044898	0.077551	0.0408163	0.0489796	0.00816327	0.044898	Q6IN74	YWHAZ	Homo sapiens (Human).	Adapter protein implicated in the regulation of a large spectrum of both general and specialized signaling pathways. Binds to a large number of partners, usually by recognition of a phosphoserine or phosphothreonine motif. Binding generally results in the modulation of the activity of the binding partner.	Interacts with CDK16 and BSPRY (By similarity). Interacts with WEE1 (C-terminal). Interacts with SAMSN1 (By similarity). Interacts with MLF1 (phosphorylated form); the interaction retains it in the cytoplasm (By similarity). Interacts with Thr- phosphorylated ITGB2 (By similarity). Interacts with BCL2L11 (By similarity). Homodimer. Heterodimerizes with YWHAE. Homo- and hetero-dimerization is inhi…	Self; NbExp=3; IntAct=EBI-347088, EBI-347088; Q29495:AANAT (xeno); NbExp=3; IntAct=EBI-347088, EBI-446413; P00519:ABL1; NbExp=2; IntAct=EBI-347088, EBI-375543; P60709:ACTB; NbExp=3; IntAct=EBI-347088, EBI-353944; Q9P0K1:ADAM22; NbExp=3; IntAct=EBI-347088, EBI-1567236; Q9P0K1-3:ADAM22; NbExp=3; IntAct=EBI-347088, EBI-1567267; P10398:ARAF; NbExp=3; IntAct=EBI-347088, EBI-365961; Q92974:ARHGEF2; NbE…
1A11_HUMAN	HLA class I histocompatibility antigen, A-11 alpha chain	HLA-A							40910.5	365	6.0596	1.94375	0.528192	-6.36763	-0.0191781	49	0.134247	372.13	1.01953	360.55	0.987808	366.92	1.00526	0.0986301	0.0136986	0.0657534	0.0630137	0.0191781	0.0794521	0.0246575	0.0356164	0.030137	0.0767123	0.0219178	0.0109589	0.0465753	0.0630137	0.0794521	0.0630137	0.0767123	0.060274	0.030137	0.0410959	Q9TQE9	HLA-A	Homo sapiens (Human).	Involved in the presentation of foreign antigens to the immune system.	Heterodimer of an alpha chain and a beta chain (beta-2- microglobulin). Interacts with human herpesvirus 8 MIR1 protein (By similarity).	N/A
1B07_HUMAN	HLA class I histocompatibility antigen, B-7 alpha chain	HLA-B	1	1	1.2	1	1.2	1.3	40434.2	362	5.65191	1.94848	0.52732	-8.40735	-0.0248619	49	0.135359	369.34	1.02028	353.99	0.977873	365.77	1.01041	0.104972	0.0165746	0.0607735	0.0745856	0.0165746	0.0745856	0.0248619	0.0276243	0.0276243	0.0773481	0.0138122	0.0138122	0.0497238	0.0552486	0.0828729	0.0718232	0.0662983	0.0690608	0.0276243	0.0441989	Q9TP95	HLA-B	Homo sapiens (Human).	Involved in the presentation of foreign antigens to the immune system.	Heterodimer of an alpha chain and a beta chain (beta-2- microglobulin). Interacts with human herpesvirus 8 MIR1 protein (By similarity). Interacts with HTLV-1 accessory protein p12I.	N/A
1C07_HUMAN	HLA class I histocompatibility antigen, Cw-7 alpha chain	HLA-C							40622.3	366	5.89706	1.93189	0.52735	-6.63181	-0.0191257	48	0.131148	373.37	1.02014	355.16	0.970383	369.92	1.01071	0.101093	0.0245902	0.057377	0.0710383	0.0163934	0.0819672	0.0218579	0.0218579	0.0273224	0.0928962	0.0218579	0.0136612	0.0491803	0.0628415	0.0819672	0.0710383	0.068306	0.0546448	0.0245902	0.0355191	Q95603	HLA-C	Homo sapiens (Human).	Involved in the presentation of foreign antigens to the immune system.	Heterodimer of an alpha chain and a beta chain (beta-2- microglobulin). Interacts with human herpesvirus 8 MIR1 protein (By similarity).	N/A
6PGD_HUMAN	6-phosphogluconate dehydrogenase, decarboxylating	PGD	1.1	1	2.8	1.4	1.9	1.3	53104.9	483	7.24788	1.74536	0.545776	-0.453439	-0.00207039	65	0.134576	495.3	1.02547	484.47	1.00304	481.59	0.997081	0.0890269	0.0186335	0.0662526	0.0496894	0.0496894	0.10352	0.0207039	0.0662526	0.0724638	0.0910973	0.0289855	0.0331263	0.0289855	0.0434783	0.0414079	0.0538302	0.0455487	0.0538302	0.0165631	0.0269151	P52209	PGD	Homo sapiens (Human).	Catalyzes the oxidative decarboxylation of 6- phosphogluconate to ribulose 5-phosphate and CO(2), with concomitant reduction of NADP to NADPH (By similarity).	Homodimer.	N/A
A1AG1_HUMAN	Alpha-1-acid glycoprotein 1	ORM1	1		0.4		0.6		23496.4	201	4.65858	1.94582	0.53403	-8.88	-0.0447761	25	0.124378	208.5	1.03731	203.79	1.01388	196.68	0.978507	0.0547264	0.0199005	0.0547264	0.0995025	0.0447761	0.0348259	0.0149254	0.0497512	0.0696517	0.104478	0.00995025	0.0497512	0.039801	0.0597015	0.039801	0.039801	0.0845771	0.0547264	0.0199005	0.0547264	P02763	ORM1	Homo sapiens (Human).	Functions as transport protein in the blood stream. Binds various ligands in the interior of its beta-barrel domain. Also binds synthetic drugs and influences their distribution and availability in the body. Appears to function in modulating the activity of the immune system during the acute-phase reaction.	N/A	P05121:SERPINE1; NbExp=4; IntAct=EBI-976767, EBI-953978;
A1AT_HUMAN	Alpha-1-antitrypsin	SERPINA1	1		1.3		1.4		46705.8	418	5.30811	1.66653	0.54201	-13.8968	-0.0358852	54	0.129187	436.57	1.04443	417.43	0.998636	409.42	0.979474	0.062201	0.00717703	0.0574163	0.076555	0.0645933	0.0574163	0.0311005	0.0478469	0.0813397	0.12201	0.0239234	0.0454545	0.0454545	0.0430622	0.0167464	0.0598086	0.0717703	0.0645933	0.00717703	0.0143541	Q86U18	SERPINA1	Homo sapiens (Human).	Inhibitor of serine proteases. Its primary target is elastase, but it also has a moderate affinity for plasmin and thrombin. Irreversibly inhibits trypsin, chymotrypsin and plasminogen activator. The aberrant form inhibits insulin-induced NO synthesis in platelets, decreases coagulation time and has proteolytic activity against insulin and plasmin. Short peptide from AAT: reversible chymotrypsin …	The variants S and Z interact with CANX AND PDIA3.	Self; NbExp=5; IntAct=EBI-986224, EBI-986224; P00760:- (xeno); NbExp=5; IntAct=EBI-986224, EBI-986385; P00772:CELA1 (xeno); NbExp=2; IntAct=EBI-986224, EBI-986248; P71213:espB (xeno); NbExp=3; IntAct=EBI-986224, EBI-2615322; P43307:SSR1; NbExp=4; IntAct=EBI-986224, EBI-714168;
A1BG_HUMAN	Alpha-1B-glycoprotein	A1BG	1.1	1.1	1.2	1.1	1.3	1.3	54218.2	495	5.7107	1.69966	0.541576	-13.9231	-0.030303	60	0.121212	497.17	1.00438	482.49	0.974727	498.26	1.00659	0.0808081	0.020202	0.0383838	0.0808081	0.0383838	0.0787879	0.0323232	0.0181818	0.0222222	0.123232	0.00808081	0.0222222	0.0868687	0.030303	0.0666667	0.0747475	0.0626263	0.0767677	0.0181818	0.020202	P04217	A1BG	Homo sapiens (Human).	N/A	Interacts with CRISP3.	N/A
A2AP_HUMAN	Alpha-2-antiplasmin	SERPINF2	1	1	0.8	0.7	0.9	0.9	54529.9	491	6.23945	1.58776	0.547821	-7.12583	-0.0162933	51	0.10387	501.15	1.02067	488.76	0.995438	484.92	0.987617	0.0631365	0.01222	0.0386965	0.0570265	0.0590631	0.0610998	0.0244399	0.0183299	0.0386965	0.152749	0.0244399	0.0325866	0.0835031	0.0753564	0.0407332	0.0835031	0.0468432	0.0631365	0.0162933	0.00814664	P08697	SERPINF2	Homo sapiens (Human).	Serine protease inhibitor. The major targets of this inhibitor are plasmin and trypsin, but it also inactivates matriptase-3/TMPRSS7 and chymotrypsin.	Forms protease inhibiting heterodimer with TMPRSS7.	N/A
A2GL_HUMAN	Leucine-rich alpha-2-glycoprotein	LRG1	1.1	0.9	1.4	1.6	1.9	2.1	38153.2	347	6.94916	1.64239	0.546859	-1.42205	-0.00576369	39	0.112392	350.67	1.01058	342.22	0.986225	346.36	0.998156	0.0691643	0.0115274	0.054755	0.0403458	0.0317003	0.074928	0.0230548	0.0144092	0.037464	0.207493	0.0115274	0.0489914	0.0720461	0.0634006	0.0518732	0.0778098	0.037464	0.0432277	0.0201729	0.00864553	P02750	LRG1	Homo sapiens (Human).	N/A	N/A	N/A
A4_HUMAN	Amyloid beta A4 protein	APP	1.1	1.2	3.1		2.9	1.3	86886	770	4.45459	1.88722	0.526013	-62.3672	-0.0831169	103	0.133766	815.72	1.05938	739.55	0.960455	764.05	0.992273	0.0818182	0.0233766	0.0649351	0.119481	0.0272727	0.0493506	0.0324675	0.0311688	0.0532468	0.0727273	0.0311688	0.0402597	0.0454545	0.0467532	0.0480519	0.0454545	0.0649351	0.0844156	0.0116883	0.025974	Q8WZ99	APP	Homo sapiens (Human).	Functions as a cell surface receptor and performs physiological functions on the surface of neurons relevant to neurite growth, neuronal adhesion and axonogenesis. Involved in cell mobility and transcription regulation through protein-protein interactions. Can promote transcription activation through binding to APBB1-KAT5 and inhibits Notch signaling through interaction with Numb. Couples to apop…	Binds, via its C-terminus, to the PID domain of several cytoplasmic proteins, including APBB family members, the APBA family, MAPK8IP1, SHC1 and, NUMB and DAB1 (By similarity). Binding to DAB1 inhibits its serine phosphorylation (By similarity). Interacts (via NPXY motif) with DAB2 (via PID domain); the interaction is impaired by tyrosine phosphorylation of the NPXY motif. Also interacts with GPC…	Self; NbExp=79; IntAct=EBI-77613, EBI-77613; Q306T3:- (xeno); NbExp=3; IntAct=EBI-77613, EBI-8294101; P31696:AGRN (xeno); NbExp=3; IntAct=EBI-2431589, EBI-457650; Q02410:APBA1; NbExp=3; IntAct=EBI-77613, EBI-368690; O00213:APBB1; NbExp=5; IntAct=EBI-77613, EBI-81694; Q92870:APBB2; NbExp=2; IntAct=EBI-77613, EBI-79277; P51693:APLP1; NbExp=2; IntAct=EBI-302641, EBI-74648; Q06481:APLP2; NbExp=2; Int…
AACT_HUMAN	Alpha-1-antichymotrypsin	SERPINA3	1	1	1.8	1.4	1.5	1.4	47619.6	423	5.19029	1.766	0.552459	-11.2656	-0.0283688	51	0.120567	447.7	1.05839	427.43	1.01047	404.56	0.956407	0.0803783	0.0070922	0.0591017	0.0685579	0.0591017	0.0378251	0.0212766	0.0472813	0.0614657	0.13948	0.0330969	0.0449173	0.0378251	0.0401891	0.0378251	0.070922	0.0685579	0.0567376	0.0070922	0.0212766	Q6NSC9	SERPINA3	Homo sapiens (Human).	Although its physiological function is unclear, it can inhibit neutrophil cathepsin G and mast cell chymase, both of which can convert angiotensin-1 to the active angiotensin-2.	Interacts with DNAJC1.	Q96KC8:DNAJC1; NbExp=3; IntAct=EBI-296557, EBI-296550;
AATC_HUMAN	Aspartate aminotransferase, cytoplasmic	GOT1							46217.6	413	7.01191	1.76465	0.543656	-1.32137	-0.00484262	52	0.125908	417.38	1.01061	415.28	1.00552	414.11	1.00269	0.0823245	0.00968523	0.0460048	0.062954	0.0556901	0.0677966	0.0217918	0.0460048	0.0508475	0.0895884	0.0145278	0.0605327	0.0581114	0.0363196	0.0532688	0.0653753	0.0532688	0.0750605	0.0217918	0.0290557	P17174	GOT1	Homo sapiens (Human).	Biosynthesis of L-glutamate from L-aspartate or L- cysteine. Important regulator of levels of glutamate, the major excitatory neurotransmitter of the vertebrate central nervous system. Acts as a scavenger of glutamate in brain neuroprotection. The aspartate aminotransferase activity is involved in hepatic glucose synthesis during development and in adipocyte glyceroneogenesis. Using L-cysteine as…	Homodimer.	N/A
ABRAL_HUMAN	Costars family protein ABRACL	ABRACL	1		0.8	100	0.7		9050.6	81	6.24036	1.92593	0.556914	-1.76253	-0.0246914	14	0.17284	85.68	1.05778	82.97	1.02432	77.7	0.959259	0.0617284	0.0123457	0.0987654	0.0617284	0.037037	0.0740741	0.037037	0.0493827	0.0864198	0.160494	0.0123457	0.0493827	0.0123457	0.0246914	0.0493827	0.0246914	0.0246914	0.111111	0	0.0123457	Q9P1F3	ABRACL	Homo sapiens (Human).	N/A	N/A	N/A
ACBP_HUMAN	Acyl-CoA-binding protein	DBI							10037.8	87	6.53687	2.17092	0.507931	-0.805165	-0.0114943	17	0.195402	94.97	1.09161	80.26	0.922529	87.62	1.00713	0.091954	0	0.0574713	0.126437	0.0344828	0.0689655	0.0229885	0.045977	0.149425	0.0574713	0.045977	0.0344828	0.0229885	0.0229885	0.0229885	0.0344828	0.0574713	0.0344828	0.0229885	0.045977	Q9UCI8	DBI	Homo sapiens (Human).	Binds medium- and long-chain acyl-CoA esters with very high affinity and may function as an intracellular carrier of acyl-CoA esters. It is also able to displace diazepam from the benzodiazepine (BZD) recognition site located on the GABA type A receptor. It is therefore possible that this protein also acts as a neuropeptide to modulate the action of the GABA receptor.	Monomer.	N/A
ACE_HUMAN	Angiotensin-converting enzyme	ACE	1		1.1		0.9		149616	1306	6.36255	1.76312	0.548476	-22.51	-0.0199081	165	0.12634	1333.91	1.02137	1304.81	0.999089	1295.23	0.991753	0.0803982	0.0107198	0.0513017	0.0612557	0.0444104	0.058193	0.0336907	0.0359877	0.0405819	0.116386	0.0229709	0.0444104	0.0620214	0.0574273	0.0520674	0.0597243	0.0474732	0.0467075	0.0313936	0.042879	P12821	ACE	Homo sapiens (Human).	Converts angiotensin I to angiotensin II by release of the terminal His-Leu, this results in an increase of the vasoconstrictor activity of angiotensin. Also able to inactivate bradykinin, a potent vasodilator. Has also a glycosidase activity which releases GPI-anchored proteins from the membrane by cleaving the mannose linkage in the GPI moiety.	N/A	N/A
ACTBL_HUMAN	Beta-actin-like protein 2	ACTBL2	1		0.7		1		41975.1	376	5.28827	1.8054	0.545213	-9.50252	-0.0265957	46	0.12234	382.49	1.01726	378.23	1.00593	374.79	0.996782	0.0718085	0.0159574	0.0585106	0.0691489	0.0345745	0.0771277	0.0212766	0.0797872	0.0478723	0.0691489	0.0452128	0.0292553	0.0558511	0.0319149	0.0531915	0.0611702	0.0611702	0.0638298	0.0106383	0.0425532	Q562R1	ACTBL2	Homo sapiens (Human).	Actins are highly conserved proteins that are involved in various types of cell motility and are ubiquitously expressed in all eukaryotic cells (By similarity).	Polymerization of globular actin (G-actin) leads to a structural filament (F-actin) in the form of a two-stranded helix. Each actin can bind to 4 others (By similarity). Interacts with PFN1 and PFDN1.	N/A
ACTG_HUMAN	Actin, cytoplasmic 2	ACTG1	0.9	1	1.2	1.2	1.2	1.2	41764.9	375	5.15942	1.78741	0.54352	-11.407	-0.032	46	0.122667	385.28	1.02741	374.24	0.997973	371.52	0.99072	0.0773333	0.016	0.0533333	0.0773333	0.0346667	0.0746667	0.024	0.0773333	0.0506667	0.072	0.0453333	0.024	0.0506667	0.032	0.048	0.0666667	0.0693333	0.056	0.0106667	0.04	P63261	ACTG1	Homo sapiens (Human).	Actins are highly conserved proteins that are involved in various types of cell motility and are ubiquitously expressed in all eukaryotic cells.	Polymerization of globular actin (G-actin) leads to a structural filament (F-actin) in the form of a two-stranded helix. Each actin can bind to 4 others.	Self; NbExp=3; IntAct=EBI-351292, EBI-351292; P60709:ACTB; NbExp=3; IntAct=EBI-351292, EBI-353944; Q9Y281:CFL2; NbExp=2; IntAct=EBI-351292, EBI-351218; P40692:MLH1; NbExp=7; IntAct=EBI-351292, EBI-744248;
ACTN1_HUMAN	Alpha-actinin-1	ACTN1	0.8	0.6	4.1	7.8	7	8.5	102990	892	5.07425	2.05943	0.534316	-35.8436	-0.0426009	135	0.151345	947.82	1.06258	873.09	0.9788	870.47	0.975863	0.0795964	0.0112108	0.0695067	0.0941704	0.0325112	0.0459641	0.0302691	0.0683857	0.0605381	0.0941704	0.0302691	0.0482063	0.0336323	0.058296	0.0605381	0.0403587	0.0560538	0.0392377	0.0179372	0.029148	P12814	ACTN1	Homo sapiens (Human).	F-actin cross-linking protein which is thought to anchor actin to a variety of intracellular structures. This is a bundling protein.	Homodimer; antiparallel. Interacts with DDN, MYOZ2, PDLIM2, TTID and LPP. Interacts with PSD. Interacts with MICALL2 (By similarity).	P27958:- (xeno); NbExp=7; IntAct=EBI-351710, EBI-6904388; P12931:SRC; NbExp=2; IntAct=EBI-351710, EBI-621482; Q8VC66:Ssx2ip (xeno); NbExp=3; IntAct=EBI-351710, EBI-6654049; Q8WZ42:TTN; NbExp=2; IntAct=EBI-351710, EBI-681210;
ACTS_HUMAN	Actin, alpha skeletal muscle	ACTA1	1	0.9	2.1	1.2	2.3	1.5	42023	377	5.05026	1.78785	0.541857	-12.4084	-0.0344828	46	0.122016	385.41	1.02231	376.6	0.998939	375.6	0.996286	0.0769231	0.0159151	0.0583554	0.0742706	0.0318302	0.0742706	0.0238727	0.0795756	0.0503979	0.0689655	0.0450928	0.0318302	0.0503979	0.0291777	0.0477454	0.061008	0.071618	0.0557029	0.0106101	0.0424403	P68133	ACTA1	Homo sapiens (Human).	Actins are highly conserved proteins that are involved in various types of cell motility and are ubiquitously expressed in all eukaryotic cells.	Polymerization of globular actin (G-actin) leads to a structural filament (F-actin) in the form of a two-stranded helix. Each actin can bind to 4 others. Identified in a complex composed of ACTA1, COBL, GSN AND TMSB4X (By similarity). Interacts with TTID. Interacts (via its C-terminus) with USP25; the interaction occurs for all USP25 isoforms but is strongest for isoform USP25m in muscle differen…	N/A
ACY1_HUMAN	Aminoacylase-1	ACY1		1		0.4		0.6	45854.9	408	6.11774	1.78176	0.544926	-9.76244	-0.0269608	55	0.134804	419.82	1.02897	405.61	0.994142	403.03	0.987819	0.0882353	0.00980392	0.0490196	0.0759804	0.0563725	0.0588235	0.0367647	0.0269608	0.0367647	0.0784314	0.0245098	0.0269608	0.0710784	0.0367647	0.0612745	0.0612745	0.0637255	0.0906863	0.0220588	0.0245098	Q03154	ACY1	Homo sapiens (Human).	Involved in the hydrolysis of N-acylated or N-acetylated amino acids (except L-aspartate).	Homodimer. Interacts with SPHK1 (By similarity).	N/A
ADIPO_HUMAN	Adiponectin	ADIPOQ	1	1	0.5	0.8	1	1	26396.3	244	5.5322	1.49406	0.524713	-7.34976	-0.0327869	27	0.110656	231.48	0.948689	240.19	0.984385	262.43	1.07553	0.0491803	0.00819672	0.0614754	0.0491803	0.0409836	0.159836	0.0327869	0.0368852	0.0491803	0.0942623	0.0204918	0.045082	0.0696721	0.0409836	0.0286885	0.0286885	0.0614754	0.057377	0.00819672	0.057377	Q15848	ADIPOQ	Homo sapiens (Human).	Important adipokine involved in the control of fat metabolism and insulin sensitivity, with direct anti-diabetic, anti-atherogenic and anti-inflammatory activities. Stimulates AMPK phosphorylation and activation in the liver and the skeletal muscle, enhancing glucose utilization and fatty-acid combustion. Antagonizes TNF-alpha by negatively regulating its expression in various tissues such as liv…	Homomultimer. Forms trimers, hexamers and 12- to 18-mers. The trimers (low molecular weight complexes / LMW) are assembled via non-covalent interactions of the collagen-like domains in a triple helix and hydrophobic interactions within the globular C1q domain. Several trimers can associate to form disulfide-linked hexamers (middle molecular weight complexes / MMW) and larger complexes (higher mol…	N/A
AFAM_HUMAN	Afamin	AFM	1	1	0.7	0.9	0.9	0.9	69022.6	599	5.70454	1.92608	0.547279	-13.2511	-0.0217028	88	0.146912	616.27	1.02883	597.7	0.99783	594.22	0.99202	0.0467446	0.0567613	0.0550918	0.0918197	0.0717863	0.0267112	0.0217028	0.0467446	0.0851419	0.0918197	0.015025	0.0550918	0.0467446	0.0450751	0.0400668	0.0584307	0.0567613	0.0601002	0	0.0283806	P43652	AFM	Homo sapiens (Human).	Vitamin E binding protein. May transport vitamin E in body fluids under conditions where the lipoprotein system is not sufficient. May be involved in the regulation and transport of vitamin E at the blood-brain barrier.	N/A	N/A
AKA12_HUMAN	A-kinase anchor protein 12	AKAP12							191364	1782	4.07065	1.83165	0.47303	-223.776	-0.126824	211	0.118406	1912.74	1.07337	1540.05	0.864226	1869.84	1.04929	0.0881033	0.00561167	0.0549944	0.177329	0.013468	0.0684624	0.0129068	0.023569	0.0830527	0.0499439	0.0112233	0.0112233	0.0639731	0.0583614	0.0224467	0.0959596	0.0768799	0.0763187	0.00448934	0.0016835	Q02952	AKAP12	Homo sapiens (Human).	Anchoring protein that mediates the subcellular compartmentation of protein kinase A (PKA) and protein kinase C (PKC).	Binds to dimeric RII-alpha regulatory subunit of PKC.	P00533:EGFR; NbExp=2; IntAct=EBI-2562430, EBI-297353;
ALBU_HUMAN	Serum albumin	ALB	1	0.9	0.7	0.8	1.1	1.2	69320.1	609	6.2144	1.9724	0.544056	-11.0133	-0.0180624	103	0.16913	654.02	1.07392	592.36	0.972677	589.67	0.968259	0.103448	0.0574713	0.0591133	0.101806	0.0574713	0.0213465	0.0262726	0.0147783	0.0985222	0.10509	0.0114943	0.0279146	0.0394089	0.0328407	0.044335	0.045977	0.047619	0.0706076	0.00328407	0.0311987	Q9P157	ALB	Homo sapiens (Human).	Serum albumin, the main protein of plasma, has a good binding capacity for water, Ca(2+), Na(+), K(+), fatty acids, hormones, bilirubin and drugs. Its main function is the regulation of the colloidal osmotic pressure of blood. Major zinc transporter in plasma, typically binds about 80% of all plasma zinc.	N/A	P02786:TFRC; NbExp=2; IntAct=EBI-714423, EBI-355727;
ALDOA_HUMAN	Fructose-bisphosphate aldolase A	ALDOA	1	1	1	1	1.1	1.2	39394.4	364	8.19917	1.7081	0.527885	3.49017	0.00824176	50	0.137363	372.43	1.02316	359.19	0.986786	364.52	1.00143	0.115385	0.021978	0.0384615	0.0659341	0.021978	0.0824176	0.0247253	0.0549451	0.0714286	0.0934066	0.010989	0.0384615	0.0521978	0.0467033	0.0412088	0.0549451	0.0604396	0.0604396	0.00824176	0.0357143	P04075	ALDOA	Homo sapiens (Human).	Plays a key role in glycolysis and gluconeogenesis. In addition, may also function as scaffolding protein (By similarity).	Homotetramer. Interacts with SNX9 and WAS (By similarity). Interacts with FBP2; the interaction blocks FBP2 inhibition by physiological concentrations of AMP and reduces inhibition by Ca(2+).	P12004:PCNA; NbExp=3; IntAct=EBI-709613, EBI-358311;
ALDOB_HUMAN	Fructose-bisphosphate aldolase B	ALDOB	1	1	1	1.1	1.2	1.7	39447.2	364	7.9581	1.67382	0.53283	2.44562	0.00549451	47	0.129121	376.6	1.03462	362.47	0.995797	359.68	0.988132	0.120879	0.0247253	0.0357143	0.0631868	0.0274725	0.0796703	0.0247253	0.0521978	0.0659341	0.0906593	0.0192308	0.0467033	0.0357143	0.0604396	0.0384615	0.0576923	0.0576923	0.0604396	0.00824176	0.0302198	P05062	ALDOB	Homo sapiens (Human).	N/A	Homotetramer. Interacts with BBS1, BBS2, BBS4 and BBS7.	Q8NFJ9:BBS1; NbExp=4; IntAct=EBI-1045507, EBI-1805484; Q9BXC9:BBS2; NbExp=4; IntAct=EBI-1045507, EBI-748297; Q96RK4:BBS4; NbExp=4; IntAct=EBI-1045507, EBI-1805814; Q8IWZ6:BBS7; NbExp=4; IntAct=EBI-1045507, EBI-1806001;
ALDOC_HUMAN	Fructose-bisphosphate aldolase C	ALDOC	1	1	0.9	1.1	0.8	1.3	39430.5	364	6.86157	1.76283	0.530385	-1.64073	-0.00549451	48	0.131868	372.86	1.02434	359.59	0.987885	364.93	1.00255	0.118132	0.0192308	0.0494505	0.0686813	0.0247253	0.0851648	0.0192308	0.0549451	0.0576923	0.0851648	0.010989	0.0384615	0.0521978	0.0412088	0.0549451	0.0521978	0.0494505	0.0741758	0.00824176	0.0357143	P09972	ALDOC	Homo sapiens (Human).	N/A	Homotetramer. Interacts with ATP6V1E1. May interact with PLD2.	N/A
ALS_HUMAN	Insulin-like growth factor-binding protein complex acid labile subunit	IGFALS	1	1.1	0.8	0.9	0.9	1	65992.2	605	6.78048	1.68731	0.560463	-4.15219	-0.00826446	69	0.11405	615.16	1.01679	596.64	0.986182	593.41	0.980843	0.0909091	0.0214876	0.0429752	0.0545455	0.0380165	0.0909091	0.0247934	0.0132231	0.0165289	0.221488	0.00330579	0.0561983	0.0595041	0.0380165	0.0727273	0.0628099	0.0280992	0.0380165	0.014876	0.0115702	P35858	IGFALS	Homo sapiens (Human).	Involved in protein-protein interactions that result in protein complexes, receptor-ligand binding or cell adhesion.	Forms a ternary complex of about 140 to 150 kDa with IGF- I or IGF-II and IGFBP-3.	N/A
AMBP_HUMAN	Protein AMBP	AMBP	1	1	1.1	1.1	1.4	1.3	38973.4	352	6.15192	1.78773	0.539545	-3.31568	-0.00852273	41	0.116477	347.92	0.988409	351.41	0.998324	359.28	1.02068	0.0596591	0.0454545	0.0340909	0.0795455	0.0397727	0.102273	0.0113636	0.0426136	0.0511364	0.0767045	0.0284091	0.0397727	0.0511364	0.0369318	0.0539773	0.0568182	0.0710227	0.0625	0.0142045	0.0426136	P02760	AMBP	Homo sapiens (Human).	Inter-alpha-trypsin inhibitor inhibits trypsin, plasmin, and lysosomal granulocytic elastase. Inhibits calcium oxalate crystallization. Trypstatin is a trypsin inhibitor (By similarity).	I-alpha-I plasma protease inhibitors are assembled from one or two heavy chains (H1, H2 or H3) and one light chain, bikunin. Inter-alpha-inhibitor (I-alpha-I) is composed of H1, H2 and bikunin, inter-alpha-like inhibitor (I-alpha-LI) of H2 and bikunin, and pre-alpha-inhibitor (P-alpha-I) of H3 and bikunin. Alpha-1-microglobulin occurs as a monomer and also in complexes with IgA and albumin. Alpha…	P07858:CTSB; NbExp=4; IntAct=EBI-2115136, EBI-715062;
AMPD2_HUMAN	AMP deaminase 2	AMPD2							100621	879	6.92671	2.02027	0.543493	-6.41933	-0.0102389	142	0.161547	906.58	1.03138	855.48	0.973242	876.79	0.997486	0.0671217	0.0159272	0.0477816	0.0853242	0.0420933	0.0489192	0.0386803	0.0341297	0.0466439	0.112628	0.0284414	0.0318544	0.0682594	0.0432309	0.076223	0.07281	0.036405	0.0591581	0.00682594	0.0375427	Q16688	AMPD2	Homo sapiens (Human).	AMP deaminase plays a critical role in energy metabolism.	Homotetramer.	N/A
AMPN_HUMAN	Aminopeptidase N	ANPEP	1	1	0.8	1	0.9	1	109469	967	5.14128	1.71361	0.543888	-22.6807	-0.024819	102	0.105481	976.2	1.00951	983.52	1.01708	967.38	1.00039	0.0723888	0.00723888	0.0496381	0.0630817	0.0434333	0.0475698	0.0175801	0.0506722	0.0465357	0.098242	0.0196484	0.073423	0.0475698	0.041365	0.041365	0.0806618	0.0661841	0.0661841	0.0258532	0.041365	P15144	ANPEP	Homo sapiens (Human).	Broad specificity aminopeptidase. Plays a role in the final digestion of peptides generated from hydrolysis of proteins by gastric and pancreatic proteases. May play a critical role in the pathogenesis of cholesterol gallstone disease. May be involved in the metabolism of regulatory peptides of diverse cell types, responsible for the processing of peptide hormones, such as angiotensin III and IV,…	Homodimer. Interacts with the S1 domain of HCoV-229E spike protein.	N/A
AMY1_HUMAN	Alpha-amylase 1	AMY1A		1		1.1		1	57729.8	511	6.92382	1.75004	0.549785	-2.41515	-0.00587084	64	0.125245	490.78	0.960431	518.01	1.01372	536.88	1.05065	0.0528376	0.0234834	0.0684932	0.0391389	0.0567515	0.101761	0.0234834	0.0547945	0.0469667	0.0528376	0.0215264	0.0802348	0.0430528	0.0234834	0.0547945	0.0645793	0.0450098	0.0684932	0.037182	0.0410959	P04745	AMY1C	Homo sapiens (Human).	N/A	Monomer.	Q8TAX7:MUC7; NbExp=2; IntAct=EBI-738586, EBI-738582;
AN32A_HUMAN	Acidic leucine-rich nuclear phosphoprotein 32 family member A	ANP32A							28567.8	249	3.71838	2.19518	0.488715	-61.7963	-0.248996	29	0.116466	270.24	1.0853	207.81	0.834578	265.25	1.06526	0.0200803	0.00803213	0.128514	0.228916	0.0160643	0.0682731	0.00803213	0.0200803	0.064257	0.128514	0.00803213	0.064257	0.0281124	0.0120482	0.0441767	0.0481928	0.0321285	0.0481928	0	0.0240964	P39687	ANP32A	Homo sapiens (Human).	Implicated in a number of cellular processes, including proliferation, differentiation, caspase-dependent and caspase- independent apoptosis, suppression of transformation (tumor suppressor), inhibition of protein phosphatase 2A, regulation of mRNA trafficking and stability in association with ELAVL1, and inhibition of acetyltransferases as part of the INHAT (inhibitor of histone acetyltransferas…	Component of the SET complex, composed of at least ANP32A, APEX1, HMGB2, NME1, SET and TREX1. Directly interacts with SET. Interacts with ATXN1/SCA1. Interacts with MAP1B. Interacts with ELAVL1. Part of the INHAT (inhibitor of histone acetyltransferases) complex. Interacts with E4F1.	O15169:AXIN1; NbExp=2; IntAct=EBI-359234, EBI-710484; Q66K89:E4F1; NbExp=3; IntAct=EBI-359234, EBI-1227043; P67775:PPP2CA; NbExp=2; IntAct=EBI-359234, EBI-712311; P63331:Ppp2ca (xeno); NbExp=2; IntAct=EBI-359234, EBI-7050205;
ANAG_HUMAN	Alpha-N-acetylglucosaminidase	NAGLU	1	1	0.7	0.8	0.9	0.7	82212.3	743	6.63008	1.63908	0.557322	-5.03016	-0.00807537	75	0.100942	763.48	1.02756	752.05	1.01218	722.78	0.972786	0.12786	0.0107672	0.0363392	0.0538358	0.0457604	0.0807537	0.0188425	0.0228802	0.0161507	0.117093	0.0174966	0.0309556	0.0592194	0.0471063	0.0659489	0.064603	0.039031	0.0699865	0.0349933	0.0403769	P54802	NAGLU	Homo sapiens (Human).	Involved in the degradation of heparan sulfate.	Monomer and homodimer.	N/A
ANGL3_HUMAN	Angiopoietin-related protein 3	ANGPTL3		1		0.9		0.7	53602.6	460	6.68354	1.99763	0.530978	-4.75848	-0.0130435	72	0.156522	464.2	1.00913	455.43	0.990065	469.13	1.01985	0.0195652	0.00869565	0.0478261	0.0891304	0.0391304	0.05	0.0326087	0.0673913	0.0826087	0.104348	0.0108696	0.0695652	0.0413043	0.0586957	0.0413043	0.0826087	0.0543478	0.0413043	0.0195652	0.0391304	Q9Y5C1	ANGPTL3	Homo sapiens (Human).	N/A	Interacts with C19orf80/ANGPTL8.	N/A
ANGT_HUMAN	Angiotensinogen	AGT	0.9	0.9	0.9	0.9	1.2	1.2	53119.4	485	6.27387	1.53693	0.552247	-7.91025	-0.0185567	52	0.107216	506.15	1.04361	495.62	1.0219	464.22	0.957155	0.103093	0.0103093	0.0515464	0.0453608	0.0453608	0.057732	0.028866	0.028866	0.043299	0.142268	0.0247423	0.0309278	0.0515464	0.0618557	0.0350515	0.0659794	0.0639175	0.0783505	0.014433	0.0164948	P01019	AGT	Homo sapiens (Human).	Essential component of the renin-angiotensin system (RAS), a potent regulator of blood pressure, body fluid and electrolyte homeostasis. Angiotensin-2: acts directly on vascular smooth muscle as a potent vasoconstrictor, affects cardiac contractility and heart rate through its action on the sympathetic nervous system, and alters renal sodium and water absorption through its ability to stimulate t…	During pregnancy, exists as a disulfide-linked 2:2 heterotetramer with the proform of PRG2 and as a complex (probably a 2:2:2 heterohexamer) with pro-PRG2 and C3dg.	P30556:AGTR1; NbExp=2; IntAct=EBI-6622938, EBI-6623016; P25095:Agtr1 (xeno); NbExp=10; IntAct=EBI-751728, EBI-764979; P50052:AGTR2; NbExp=2; IntAct=EBI-2927577, EBI-1748067; Q10714:Ance (xeno); NbExp=2; IntAct=EBI-751728, EBI-115736;
ANT3_HUMAN	Antithrombin-III	SERPINC1	0.9	0.8	0.8	0.6	0.7	0.5	52568.1	464	6.67732	1.94871	0.542974	-1.84389	-0.00431034	65	0.140086	482.01	1.03881	462.24	0.996207	458.74	0.988664	0.0668103	0.0172414	0.0517241	0.0818966	0.0581897	0.0452586	0.0107759	0.0517241	0.0797414	0.0969828	0.0280172	0.0517241	0.0452586	0.0280172	0.049569	0.075431	0.0560345	0.0689655	0.0107759	0.0258621	Q9UC78	SERPINC1	Homo sapiens (Human).	Most important serine protease inhibitor in plasma that regulates the blood coagulation cascade. AT-III inhibits thrombin, matriptase-3/TMPRSS7, as well as factors IXa, Xa and XIa. Its inhibitory activity is greatly enhanced in the presence of heparin.	Forms protease inhibiting heterodimer with TMPRSS7.	N/A
ANXA1_HUMAN	Annexin A1	ANXA1							38689.3	346	7.03685	2.06434	0.526445	-0.68241	-0.00289017	56	0.16185	366.02	1.05786	339.48	0.981156	342.25	0.989162	0.0953757	0.0115607	0.0751445	0.0751445	0.0317919	0.0578035	0.0144509	0.0606936	0.0924855	0.0982659	0.0260116	0.0375723	0.0231214	0.0375723	0.0549133	0.0549133	0.0635838	0.0549133	0.00289017	0.0317919	P04083	ANXA1	Homo sapiens (Human).	Calcium/phospholipid-binding protein which promotes membrane fusion and is involved in exocytosis. This protein regulates phospholipase A2 activity. It seems to bind from two to four calcium ions with high affinity.	Homodimer in placenta (20%); linked by transglutamylation. Interacts with DYSF (By similarity).	Q9Y6K9:IKBKG; NbExp=6; IntAct=EBI-354007, EBI-81279; Q13546:RIPK1; NbExp=5; IntAct=EBI-354007, EBI-358507;
APEX1_HUMAN	DNA-(apurinic or apyrimidinic site) lyase	APEX1							35531.4	318	8.25586	1.95255	0.524025	3.26579	0.00943396	52	0.163522	323.86	1.01843	300.75	0.945755	329.29	1.0355	0.0849057	0.0220126	0.0597484	0.0754717	0.0283019	0.0786164	0.0188679	0.0251572	0.091195	0.116352	0.00943396	0.0345912	0.0660377	0.0314465	0.0534591	0.0628931	0.0345912	0.0471698	0.0220126	0.0377358	P27695	APEX1	Homo sapiens (Human).	Multifunctional protein that plays a central role in the cellular response to oxidative stress. The two major activities of APEX1 in DNA repair and redox regulation of transcriptional factors. Functions as a apurinic/apyrimidinic (AP) endodeoxyribonuclease in the DNA base excision repair (BER) pathway of DNA lesions induced by oxidative and alkylating agents. Initiates repair of AP sites in DNA b…	Monomer. Homodimer; disulfide-linked. Component of the SET complex, composed of at least APEX1, SET, ANP32A, HMGB2, NME1 and TREX1. Associates with the dimer XRCC5/XRCC6 in a DNA- dependent manner. Interacts with SIRT1; the interaction is increased in the context of genotoxic stress. Interacts with HDAC1, HDAC2 and HDAC3; the interactions are not dependent on the APEX1 acetylation status. Interac…	Q09472:EP300; NbExp=8; IntAct=EBI-1048805, EBI-447295; Q96EB6:SIRT1; NbExp=6; IntAct=EBI-1048805, EBI-1802965;
APMAP_HUMAN	Adipocyte plasma membrane-associated protein	APMAP		1		1.9		3	46450.1	416	6.02259	1.92685	0.547115	-4.53909	-0.0120192	54	0.129808	418.68	1.00644	414.34	0.99601	419.82	1.00918	0.0456731	0.00721154	0.0649038	0.0625	0.0552885	0.0841346	0.0144231	0.0336538	0.0384615	0.120192	0.0336538	0.0264423	0.0673077	0.0288462	0.0769231	0.0769231	0.0504808	0.0817308	0.00961538	0.0216346	Q9HDC9	APMAP	Homo sapiens (Human).	Exhibits strong arylesterase activity with beta-naphthyl acetate and phenyl acetate. May play a role in adipocyte differentiation.	N/A	N/A
APOA1_HUMAN	Apolipoprotein A-I	APOA1	1.1	1.1	0.8	1.4	1.2	2	30758.3	267	5.50143	2.1761	0.520375	-6.40574	-0.0262172	45	0.168539	291.57	1.09202	252.7	0.946442	259.84	0.973184	0.0861423	0	0.0599251	0.11236	0.0299625	0.0411985	0.0224719	0	0.082397	0.153558	0.0149813	0.0187266	0.0374532	0.071161	0.0636704	0.0599251	0.0449438	0.0561798	0.0187266	0.0262172	P02647	APOA1	Homo sapiens (Human).	Participates in the reverse transport of cholesterol from tissues to the liver for excretion by promoting cholesterol efflux from tissues and by acting as a cofactor for the lecithin cholesterol acyltransferase (LCAT). As part of the SPAP complex, activates spermatozoa motility.	Interacts with APOA1BP and CLU. Component of a sperm activating protein complex (SPAP), consisting of APOA1, an immunoglobulin heavy chain, an immunoglobulin light chain and albumin. Interacts with NDRG1.	Self; NbExp=12; IntAct=EBI-701692, EBI-701692; O95477:ABCA1; NbExp=4; IntAct=EBI-701692, EBI-784112; P05067:APP; NbExp=5; IntAct=EBI-701692, EBI-77613; P00738:HP; NbExp=3; IntAct=EBI-701692, EBI-1220767;
APOA2_HUMAN	Apolipoprotein A-II	APOA2	0.8	0.9	2.7	3	3.5	3.7	11167.8	100	6.59924	1.8021	0.5327	-0.0793489	0	12	0.12	107.44	1.0744	101.42	1.0142	94.37	0.9437	0.08	0.02	0.02	0.1	0.04	0.04	0	0.02	0.1	0.15	0.02	0.01	0.04	0.07	0.02	0.07	0.08	0.08	0	0.04	P02652	APOA2	Homo sapiens (Human).	May stabilize HDL (high density lipoprotein) structure by its association with lipids, and affect the HDL metabolism.	Homodimer; disulfide-linked. Also forms a disulfide- linked heterodimer with APOD. Interacts with HCV core protein. Interacts with APOA1BP and NDRG1.	N/A
APOA4_HUMAN	Apolipoprotein A-IV	APOA4	1.1	1.1	0.6	0.6	0.6	0.6	45370.6	396	5.047	2.17869	0.511136	-13.19	-0.0353535	62	0.156566	436.69	1.10275	376.04	0.949596	382.03	0.964722	0.0909091	0	0.0479798	0.123737	0.030303	0.040404	0.020202	0.0126263	0.0707071	0.141414	0.0151515	0.040404	0.030303	0.108586	0.0656566	0.0454545	0.0378788	0.0580808	0.00252525	0.0176768	P06727	APOA4	Homo sapiens (Human).	May have a role in chylomicrons and VLDL secretion and catabolism. Required for efficient activation of lipoprotein lipase by ApoC-II; potent activator of LCAT. Apoa-IV is a major component of HDL and chylomicrons.	Homodimer.	N/A
APOA_HUMAN	Apolipoprotein(a)	LPA	1		1		0.4		500985	4548	5.76657	1.58897	0.513738	-110.338	-0.0244063	422	0.092788	4206.44	0.924899	4440.73	0.976414	4930.84	1.08418	0.0776165	0.0529903	0.0290237	0.0611258	0.00417766	0.0690413	0.0270449	0.0129727	0.00549692	0.0325418	0.0180299	0.0437555	0.10752	0.0510114	0.0602463	0.0802551	0.112797	0.0611258	0.0208883	0.0723395	P08519	LPA	Homo sapiens (Human).	Apo(a) is the main constituent of lipoprotein(a) (Lp(a)). It has serine proteinase activity and is able of autoproteolysis. Inhibits tissue-type plasminogen activator 1. Lp(a) may be a ligand for megalin/Gp 330.	Disulfide-linked to apo-B100. Binds to fibronectin and decorin.	P02749:APOH; NbExp=4; IntAct=EBI-9232288, EBI-2114682; P02751:FN1; NbExp=2; IntAct=EBI-9232288, EBI-1220319;
APOB_HUMAN	Apolipoprotein B-100	APOB	1.1	0.9	1.1	1	1.4	1.2	515271	4563	7.04004	1.80513	0.540283	-15.2802	-0.00547885	620	0.135876	4691.01	1.02805	4616.69	1.01177	4514.95	0.98947	0.0604865	0.0052597	0.0512821	0.0650888	0.0490905	0.0453649	0.0249836	0.0628972	0.0780188	0.117467	0.0173132	0.0536927	0.0374753	0.0506246	0.0328731	0.0861275	0.0655271	0.0547885	0.0081087	0.0335306	Q13787	APOB	Homo sapiens (Human).	Apolipoprotein B is a major protein constituent of chylomicrons (apo B-48), LDL (apo B-100) and VLDL (apo B-100). Apo B-100 functions as a recognition signal for the cellular binding and internalization of LDL particles by the apoB/E receptor.	Interacts with PCSK9.	P29991:- (xeno); NbExp=3; IntAct=EBI-3926040, EBI-8826488; P01130:LDLR; NbExp=4; IntAct=EBI-3926040, EBI-988319;
APOC1_HUMAN	Apolipoprotein C-I	APOC1	1	1	1.4	1.5	1.3	1.2	9325.97	83	9.1749	2.06807	0.54	1.01222	0.0120482	13	0.156627	89.75	1.08133	81.5	0.981928	79.65	0.959639	0.060241	0	0.0481928	0.0963855	0.0481928	0.0361446	0	0.0481928	0.108434	0.144578	0.0240964	0.0120482	0.0481928	0.0361446	0.0481928	0.108434	0.0361446	0.0843373	0.0120482	0	P02654	APOC1	Homo sapiens (Human).	Appears to modulate the interaction of APOE with beta- migrating VLDL and inhibit binding of beta-VLDL to the LDL receptor-related protein. Binds free fatty acids and reduces their intracellular esterification.	N/A	N/A
APOC2_HUMAN	Apolipoprotein C-II	APOC2	1	1	1.6	1.5	1.2	1.1	11276.7	101	4.3624	1.63396	0.52901	-3.99182	-0.039604	8	0.0792079	105.51	1.04465	102.46	1.01446	98.27	0.97297	0.0693069	0	0.039604	0.0792079	0.039604	0.049505	0	0.00990099	0.0594059	0.148515	0.029703	0.00990099	0.049505	0.0792079	0.019802	0.0891089	0.0990099	0.0693069	0.00990099	0.049505	P02655	APOC2	Homo sapiens (Human).	Component of the very low density lipoprotein (VLDL) fraction in plasma, and is an activator of several triacylglycerol lipases. The association of APOC2 with plasma chylomicrons, VLDL, and HDL is reversible, a function of the secretion and catabolism of triglyceride-rich lipoproteins, and changes rapidly.	N/A	N/A
APOC3_HUMAN	Apolipoprotein C-III	APOC3	1.1	1	1.7	1.7	1.5	1.6	10845.4	99	5.0351	1.67182	0.540808	-1.90107	-0.020202	11	0.111111	107.61	1.08697	97.88	0.988687	95.13	0.960909	0.151515	0	0.0707071	0.0505051	0.040404	0.030303	0.010101	0	0.0606061	0.111111	0.030303	0	0.030303	0.0606061	0.040404	0.121212	0.0505051	0.0909091	0.030303	0.020202	P02656	APOC3	Homo sapiens (Human).	Inhibits lipoprotein lipase and hepatic lipase and decreases the uptake of lymph chylomicrons by hepatic cells. This suggests that it delays the catabolism of triglyceride-rich particles.	N/A	N/A
APOC4_HUMAN	Apolipoprotein C-IV	APOC4	1	1	1.3	2.5	1.1	2.7	14543.2	127	9.13206	2.0322	0.557795	5.92108	0.0472441	20	0.15748	128.23	1.00969	127.18	1.00142	125.31	0.986693	0.0472441	0.0472441	0.0551181	0.0393701	0.0314961	0.0629921	0.015748	0.00787402	0.0629921	0.165354	0.0314961	0.015748	0.0629921	0.0472441	0.0787402	0.0708661	0.0551181	0.0472441	0.0393701	0.015748	P55056	APOC4	Homo sapiens (Human).	May participate in lipoprotein metabolism.	N/A	N/A
APOE_HUMAN	Apolipoprotein E	APOE	0.8	0.9	0.8	0.9	1	1.2	36131.4	317	5.42165	2.34574	0.523502	-3.83884	-0.0126183	49	0.154574	355.17	1.12041	305.3	0.963091	294.13	0.927855	0.123028	0.00630915	0.0347003	0.126183	0.0126183	0.0567823	0.00630915	0.00630915	0.0410095	0.129338	0.0252366	0.00315457	0.0252366	0.100946	0.107256	0.044164	0.0378549	0.0757098	0.0252366	0.0126183	P02649	APOE	Homo sapiens (Human).	Mediates the binding, internalization, and catabolism of lipoprotein particles. It can serve as a ligand for the LDL (apo B/E) receptor and for the specific apo-E receptor (chylomicron remnant) of hepatic tissues.	N/A	Q16543:CDC37; NbExp=3; IntAct=EBI-1222467, EBI-295634; Q9BQ95:ECSIT; NbExp=4; IntAct=EBI-1222467, EBI-712452; P00738:HP; NbExp=7; IntAct=EBI-1222467, EBI-1220767; P01130:LDLR; NbExp=2; IntAct=EBI-1222467, EBI-988319; Q14114:LRP8; NbExp=2; IntAct=EBI-1222467, EBI-2681187; P10636:MAPT; NbExp=3; IntAct=EBI-9209835, EBI-366182; Q53EL6:PDCD4; NbExp=3; IntAct=EBI-1222467, EBI-935824; P50502:ST13; NbExp…
APOF_HUMAN	Apolipoprotein F	APOF	1	0.9	1.1	1.1	1.2	1	35376.3	326	5.36333	1.58733	0.543098	-6.69778	-0.0214724	31	0.095092	331.47	1.01678	326.72	1.00221	323.18	0.99135	0.0889571	0.0184049	0.0429448	0.0552147	0.0184049	0.0858896	0.0184049	0.0368098	0.0306748	0.147239	0.0276074	0.0276074	0.0521472	0.0674847	0.0460123	0.0828221	0.0521472	0.0552147	0.00920245	0.0368098	Q13790	APOF	Homo sapiens (Human).	Minor apolipoprotein that associates with LDL. Inhibits cholesteryl ester transfer protein (CETP) activity and appears to be an important regulator of cholesterol transport. Also associates to a lesser degree with VLDL, Apo-AI and Apo-AII.	N/A	N/A
APOH_HUMAN	Beta-2-glycoprotein 1	APOH	0.9	1	0.9	0.8	1.1	1	38271.9	345	8.02758	1.65159	0.540551	5.53785	0.0173913	46	0.133333	330.9	0.95913	341.79	0.990696	361.83	1.04878	0.0550725	0.0666667	0.0405797	0.057971	0.057971	0.0666667	0.0173913	0.0463768	0.0869565	0.057971	0.0144928	0.0405797	0.0927536	0.0115942	0.0289855	0.0666667	0.0782609	0.057971	0.0144928	0.0405797	P02749	APOH	Homo sapiens (Human).	Binds to various kinds of negatively charged substances such as heparin, phospholipids, and dextran sulfate. May prevent activation of the intrinsic blood coagulation cascade by binding to phospholipids on the surface of damaged cells.	N/A	Self; NbExp=2; IntAct=EBI-2114682, EBI-2114682; P08519:LPA; NbExp=4; IntAct=EBI-2114682, EBI-9232288;
APOL1_HUMAN	Apolipoprotein L1	APOL1	0.8	0.9	1.2	2.1	1.7	3.1	43946.1	398	5.54678	1.86698	0.537111	-6.44212	-0.0175879	52	0.130653	419.03	1.05284	392.44	0.98603	389.44	0.978492	0.0904523	0.00251256	0.0477387	0.0854271	0.0276382	0.0728643	0.0150754	0.0477387	0.0628141	0.125628	0.0226131	0.0477387	0.0326633	0.040201	0.0527638	0.0728643	0.0477387	0.0703518	0.0175879	0.0175879	Q96PM4	APOL1	Homo sapiens (Human).	May play a role in lipid exchange and transport throughout the body. May participate in reverse cholesterol transport from peripheral cells to the liver.	In plasma, interacts with APOA1 and mainly associated with large high density lipoprotein particles.	N/A
APOM_HUMAN	Apolipoprotein M	APOM	1	1	1	1.4	1.4	1.3	21238.9	188	5.92398	1.68543	0.552021	-4.7043	-0.0265957	22	0.117021	189.82	1.00968	186.59	0.9925	187.41	0.996862	0.0638298	0.0319149	0.037234	0.0744681	0.0531915	0.0691489	0.0319149	0.0478723	0.0425532	0.111702	0.0319149	0.0425532	0.0638298	0.0425532	0.0425532	0.0638298	0.0638298	0.0319149	0.0159574	0.037234	O95445	APOM	Homo sapiens (Human).	Probably involved in lipid transport. Can bind sphingosine-1-phosphate, myristic acid, palmitic acid and stearic acid, retinol, all-trans-retinoic acid and 9-cis-retinoic acid.	N/A	N/A
ARHGB_HUMAN	Rho guanine nucleotide exchange factor 11	ARHGEF11							167597	1522	5.18371	1.90969	0.513469	-47.9597	-0.0335085	213	0.139947	1540.34	1.01205	1403.62	0.922221	1595.21	1.0481	0.065046	0.00985545	0.0611038	0.087385	0.022339	0.0663601	0.0249671	0.0407359	0.0499343	0.109724	0.0197109	0.0275953	0.0893561	0.0519054	0.065046	0.0985545	0.0473062	0.042707	0.0065703	0.0137976	O15085	ARHGEF11	Homo sapiens (Human).	May play a role in the regulation of RhoA GTPase by guanine nucleotide-binding alpha-12 (GNA12) and alpha-13 (GNA13). Acts as guanine nucleotide exchange factor (GEF) for RhoA GTPase and may act as GTPase-activating protein (GAP) for GNA12 and GNA13.	Interacts with GNA12 and GNA13 through the RGS domain. Interacts with RHOA, PLXNB1 and PLXNB2. Interacts with SLC1A6 (By similarity). Interacts (via DH domain) with GCSAM (via C- terminus).	P46108:CRK; NbExp=2; IntAct=EBI-311099, EBI-886; Q8BPM0:Daam1 (xeno); NbExp=3; IntAct=EBI-6169263, EBI-772938; P16333:NCK1; NbExp=3; IntAct=EBI-311099, EBI-389883; P61586:RHOA; NbExp=6; IntAct=EBI-311099, EBI-446668; Q7DB74:Z5115 (xeno); NbExp=4; IntAct=EBI-311099, EBI-7864788;
ASCC2_HUMAN	Activating signal cointegrator 1 complex subunit 2	ASCC2	1		0.9		1.2		86304.4	757	4.78277	1.99172	0.531664	-35.7339	-0.0488771	109	0.143989	785.4	1.03752	729.8	0.964069	763.43	1.00849	0.0700132	0.0171731	0.0832232	0.0845443	0.0422721	0.0396301	0.0250991	0.0435931	0.0554822	0.109643	0.0171731	0.0330251	0.0607662	0.0501982	0.0634082	0.0673712	0.0462351	0.0528402	0.00660502	0.0317041	Q9H1I8	ASCC2	Homo sapiens (Human).	Enhances NF-kappa-B, SRF and AP1 transactivation.	Part of TRIP4 complex, that contains ASCC1, ASCC2 and ASCC3. The TRIP4 complex interacts with ALKHB3.	N/A
ASC_HUMAN	Apoptosis-associated speck-like protein containing a CARD	PYCARD							21612.9	195	6.27646	1.86051	0.537385	-1.75214	-0.0102564	25	0.128205	208.5	1.06923	190.74	0.978154	187.63	0.962205	0.128205	0.00512821	0.0564103	0.0666667	0.025641	0.0615385	0.0153846	0.025641	0.0512821	0.158974	0.025641	0.025641	0.0461538	0.0564103	0.0615385	0.0512821	0.0512821	0.0410256	0.0153846	0.0307692	Q9ULZ3	PYCARD	Homo sapiens (Human).	Functions as key mediator in apoptosis and inflammation. Promotes caspase-mediated apoptosis involving predominantly caspase-8 and also caspase-9 in a probable cell type-specific manner. Involved in activation of the mitochondrial apoptotic pathway, promotes caspase-8-dependent proteolytic maturation of BID independently of FADD in certain cell types and also mediates mitochondrial translocation …	Self-associates; enforced oligomerization induces apoptosis, NF-kappa-B regulation and interleukin-1 beta seceretion. Homooligomers can form disk-like particles of approximately 12 nm diameter and approximately 1 nm height. Next to isorm 1 also isoform 2 and isoform 3 may be involved in oligomerization leading to functional regulation. Component of several inflammasomes containing one pattern rec…	O14862:AIM2; NbExp=4; IntAct=EBI-751215, EBI-6253193; Q07812:BAX; NbExp=7; IntAct=EBI-751215, EBI-516580; Q9C000:NLRP1; NbExp=5; IntAct=EBI-751215, EBI-1220518; Q96P20:NLRP3; NbExp=4; IntAct=EBI-751215, EBI-6253230; Q56P42:PYDC2; NbExp=4; IntAct=EBI-751215, EBI-6374418;
ASGR2_HUMAN	Asialoglycoprotein receptor 2	ASGR2	1		1		1.6		35068.8	311	6.22102	1.66135	0.545949	-9.09156	-0.0321543	42	0.135048	311.96	1.00309	307.39	0.988392	316.16	1.01659	0.0610932	0.0353698	0.0546624	0.0643087	0.0450161	0.0771704	0.0482315	0.0257235	0.0450161	0.0932476	0.0096463	0.0514469	0.0418006	0.0707395	0.0418006	0.0771704	0.0418006	0.0643087	0.0353698	0.0160772	P07307	ASGR2	Homo sapiens (Human).	Mediates the endocytosis of plasma glycoproteins to which the terminal sialic acid residue on their complex carbohydrate moieties has been removed. The receptor recognizes terminal galactose and N-acetylgalactosamine units. After ligand binding to the receptor, the resulting complex is internalized and transported to a sorting organelle, where receptor and ligand are disassociated. The receptor t…	The functioning ligand-binding unit of this receptor is thought to be at least a dimer. Interacts with LASS2.	Q96G23:CERS2; NbExp=3; IntAct=EBI-1172636, EBI-1057080;
ATF6B_HUMAN	Cyclic AMP-dependent transcription factor ATF-6 beta	ATF6B	1		0.5		0.9		76659.8	703	6.17432	1.7744	0.518549	-7.35373	-0.0113798	84	0.119488	697.26	0.991835	660.58	0.939659	739.29	1.05162	0.059744	0.0142248	0.0455192	0.0697013	0.027027	0.0526316	0.0156472	0.0312945	0.0398293	0.109531	0.0213371	0.0256046	0.12091	0.0625889	0.0640114	0.12091	0.0384068	0.0668563	0.0056899	0.00853485	Q9H3V9	ATF6B	Homo sapiens (Human).	Transcriptional factor that acts in the unfolded protein response (UPR) pathway by activating UPR target genes induced during ER stress. Binds DNA on the 5'-CCAC[GA]-3' half of the ER stress response element (ERSE) (5'-CCAATN(9)CCAC[GA]-3') when NF-Y is bound to ERSE.	Homodimer and heterodimer with ATF6-alpha. The dimer interacts with the nuclear transcription factor Y (NF-Y) trimer through direct binding to NF-Y subunit C (NF-YC).	P27958:- (xeno); NbExp=5; IntAct=EBI-2841031, EBI-8763498;
ATL2_HUMAN	ADAMTS-like protein 2	ADAMTSL2	1		1				104551	951	6.37677	1.78195	0.528433	-12.7609	-0.0126183	123	0.129338	907.78	0.954553	916.19	0.963396	1020.41	1.07299	0.0567823	0.0651945	0.0567823	0.0630915	0.0273396	0.0946372	0.022082	0.0189274	0.0431125	0.0578339	0.0147213	0.0368034	0.0662461	0.042061	0.064143	0.086225	0.0662461	0.0630915	0.0231335	0.0315457	Q86TH1	ADAMTSL2	Homo sapiens (Human).	N/A	Interacts with LTBP1.	N/A
ATRN_HUMAN	Attractin	ATRN	1.1	1.1	0.7	0.8	0.9	1.1	158429	1429	7.31891	1.62402	0.553478	-0.0253642	0	172	0.120364	1386.61	0.970336	1434.36	1.00375	1473.62	1.03122	0.0713786	0.0615815	0.0454864	0.0454864	0.0412876	0.073478	0.0293912	0.0377887	0.043387	0.0783765	0.0209937	0.0608817	0.0524843	0.0363891	0.0475857	0.0839748	0.0552834	0.056683	0.0216935	0.0363891	Q9NTQ3	ATRN	Homo sapiens (Human).	Involved in the initial immune cell clustering during inflammatory response and may regulate chemotactic activity of chemokines. May play a role in melanocortin signaling pathways that regulate energy homeostasis and hair color. Low-affinity receptor for agouti (By similarity). Has a critical role in normal myelination in the central nervous system (By similarity).	Monomer and homotrimer.	N/A
ATS13_HUMAN	A disintegrin and metalloproteinase with thrombospondin motifs 13	ADAMTS13	1	1	1.1	0.9	1.2	1.1	153502	1427	7.16058	1.68446	0.539397	-2.69938	-0.00140154	165	0.115627	1394.62	0.977309	1385.06	0.97061	1473.27	1.03242	0.0932025	0.0574632	0.0399439	0.0553609	0.0224247	0.101612	0.0217239	0.0231254	0.0168185	0.0889979	0.0168185	0.0175193	0.082691	0.0539594	0.0770848	0.0777856	0.0504555	0.0623686	0.0231254	0.0175193	Q76LX8	ADAMTS13	Homo sapiens (Human).	Cleaves the vWF multimers in plasma into smaller forms.	N/A	P04275:VWF; NbExp=5; IntAct=EBI-981764, EBI-981819;
B2MG_HUMAN	Beta-2-microglobulin	B2M	1	1	0.9	0.8	0.5	0.4	13705.5	119	6.50995	1.90681	0.552017	-1.71525	-0.0168067	18	0.151261	121.23	1.01874	119.41	1.00345	119.34	1.00286	0.0504202	0.0168067	0.0588235	0.0756303	0.0420168	0.0336134	0.0336134	0.0420168	0.0672269	0.109244	0.0168067	0.0420168	0.0420168	0.0252101	0.0504202	0.109244	0.0420168	0.0756303	0.0168067	0.0504202	P61769	B2M	Homo sapiens (Human).	Component of the class I major histocompatibility complex (MHC). Involved in the presentation of peptide antigens to the immune system.	Heterodimer of an alpha chain and a beta chain. Beta-2- microglobulin is the beta-chain of major histocompatibility complex class I molecules. Polymers of beta 2-microglobulin can be found in tissues from patients on long-term hemodialysis.	Self; NbExp=9; IntAct=EBI-714718, EBI-714718; P06126:CD1A; NbExp=2; IntAct=EBI-714718, EBI-1036766; P29016:CD1B; NbExp=3; IntAct=EBI-714718, EBI-1033762; Q30201:HFE; NbExp=3; IntAct=EBI-714718, EBI-1028850;
B3GN1_HUMAN	N-acetyllactosaminide beta-1,3-N-acetylglucosaminyltransferase	B3GNT1	1		1.3		1.7		47088	415	7.22014	1.83651	0.553373	-0.504537	-0.00240964	52	0.125301	427.91	1.03111	418.4	1.00819	405.83	0.977904	0.0939759	0.0192771	0.0385542	0.0674699	0.0457831	0.0578313	0.0216867	0.0168675	0.0337349	0.125301	0.026506	0.0433735	0.0650602	0.0554217	0.0698795	0.053012	0.026506	0.0771084	0.0144578	0.0481928	O43505	B3GNT1	Homo sapiens (Human).	Can initiate the synthesis or the elongation of the linear poly-N-acetyllactosaminoglycans. Involved in alpha- dystroglycan (DAG1) glycosylation.	N/A	N/A
B3GN2_HUMAN	UDP-GlcNAc:betaGal beta-1,3-N-acetylglucosaminyltransferase 2	B3GNT2	1		0.9		0.8		45991.2	397	8.74629	1.92972	0.554232	6.98431	0.0151134	64	0.161209	397.65	1.00164	404.53	1.01897	398.94	1.00489	0.0327456	0.0176322	0.0579345	0.0528967	0.0503778	0.0554156	0.0352645	0.0579345	0.0755668	0.115869	0.0251889	0.0579345	0.0503778	0.0377834	0.0503778	0.0680101	0.0403023	0.0579345	0.0151134	0.0453401	Q9NY97	B3GNT2	Homo sapiens (Human).	Catalyzes the initiation and elongation of poly-N- acetyllactosamine chains.	Interacts with B3GNT8; this interaction greatly increases B3GNT2 catalytic activity, independently of B3GNT8 enzymatic activity.	N/A
BABA1_HUMAN	BRISC and BRCA1-A complex member 1	BABAM1		1	29.4				36535.9	329	4.30244	1.71498	0.526474	-26.6969	-0.0820669	35	0.106383	341.56	1.03818	308.11	0.936505	334.38	1.01635	0.0729483	0.0273556	0.0395137	0.12766	0.0364742	0.0455927	0.0212766	0.0303951	0.0486322	0.0820669	0.0303951	0.0334347	0.0790274	0.0364742	0.0364742	0.0942249	0.0577508	0.0668693	0.00911854	0.0243161	Q9NWV8	BABAM1	Homo sapiens (Human).	Component of the BRCA1-A complex, a complex that specifically recognizes 'Lys-63'-linked ubiquitinated histones H2A and H2AX at DNA lesions sites, leading to target the BRCA1-BARD1 heterodimer to sites of DNA damage at double-strand breaks (DSBs). The BRCA1-A complex also possesses deubiquitinase activity that specifically removes 'Lys-63'-linked ubiquitin on histones H2A and H2AX. In the BRCA1-A…	Component of the BRCA1-A complex, at least composed of the BRCA1, BARD1, UIMC1/RAP80, FAM175A/Abraxas, BRCC3/BRCC36, BRE/BRCC45 and BABAM1/NBA1. In the BRCA1-A complex, interacts directly with FAM175A/Abraxas and BRE/BRCC45. Component of the BRISC complex, at least composed of the FAM175B/ABRO1, BRCC3/BRCC36, BRE/BRCC45 and BABAM1/NBA1.	Q9NXR7:BRE; NbExp=3; IntAct=EBI-745725, EBI-949389; Q9H2K2:TNKS2; NbExp=4; IntAct=EBI-745725, EBI-4398527;
BAHC1_HUMAN	BAH and coiled-coil domain-containing protein 1	BAHCC1							276753	2608	9.04974	1.80587	0.504655	49.8337	0.0172546	405	0.155291	2589.77	0.99301	2345.64	0.899402	2806.54	1.07613	0.107745	0.0187883	0.0429448	0.0667178	0.0218558	0.0966258	0.0283742	0.0141871	0.0586656	0.095092	0.0115031	0.014954	0.103911	0.0460123	0.0682515	0.100077	0.0406442	0.0417945	0.0053681	0.0164877	Q9P281	BAHCC1	Homo sapiens (Human).	N/A	N/A	N/A
BASP1_HUMAN	Brain acid soluble protein 1	BASP1	1	1	1.9	1.7	1.4	1	22679.8	227	4.30288	1.68022	0.420881	-18.931	-0.0837004	32	0.140969	253.94	1.11868	163.51	0.720308	250.42	1.10317	0.251101	0	0.0352423	0.189427	0	0.0748899	0	0	0.140969	0.00440529	0.00440529	0.0132159	0.123348	0.030837	0	0.0660793	0.0440529	0.0176211	0	0.00440529	P80723	BASP1	Homo sapiens (Human).	N/A	N/A	N/A
BFSP1_HUMAN	Filensin	BFSP1	1		0.8		1.3		74497.8	665	4.80006	2.20606	0.499414	-29.0675	-0.0451128	107	0.160902	710.24	1.06803	612.68	0.921323	669.74	1.00713	0.0857143	0.0075188	0.0496241	0.13985	0.0135338	0.0571429	0.0165414	0.043609	0.0706767	0.0932331	0.0075188	0.0180451	0.0556391	0.0646617	0.0736842	0.0646617	0.0556391	0.0571429	0.00150376	0.0240602	Q12934	BFSP1	Homo sapiens (Human).	N/A	Associates with BFSP2.	N/A
BGH3_HUMAN	Transforming growth factor-beta-induced protein ig-h3	TGFBI	1	1.1	0.7	0.9	0.9	1.2	74632.1	683	7.77091	1.74751	0.544553	2.29828	0.00146413	89	0.130307	696.49	1.01975	691.99	1.01316	669.65	0.980454	0.0893119	0.0161054	0.0395315	0.0614934	0.0234261	0.0702782	0.0278184	0.0585652	0.0483163	0.127379	0.0204978	0.0585652	0.045388	0.0322108	0.0541728	0.0600293	0.0673499	0.0688141	0.00292826	0.0278184	O43219	TGFBI	Homo sapiens (Human).	Binds to type I, II, and IV collagens. This adhesion protein may play an important role in cell-collagen interactions. In cartilage, may be involved in endochondral bone formation.	N/A	N/A
BLMH_HUMAN	Bleomycin hydrolase	BLMH	0.7		0.9	20.7	0.3	17.2	52526.8	455	6.20182	1.89369	0.550989	-8.25449	-0.0197802	66	0.145055	469.74	1.0324	457.67	1.00587	450.11	0.989253	0.0505495	0.0241758	0.0571429	0.0791209	0.0571429	0.0549451	0.0285714	0.0417582	0.0725275	0.0857143	0.0395604	0.0549451	0.043956	0.0395604	0.043956	0.0505495	0.0461538	0.0769231	0.0197802	0.032967	Q13867	BLMH	Homo sapiens (Human).	The normal physiological role of BLM hydrolase is unknown, but it catalyzes the inactivation of the antitumor drug BLM (a glycopeptide) by hydrolyzing the carboxamide bond of its B- aminoalaninamide moiety thus protecting normal and malignant cells from BLM toxicity (By similarity).	Homohexamer.	P05067-4:APP; NbExp=2; IntAct=EBI-718504, EBI-302641;
BMP1_HUMAN	Bone morphogenetic protein 1	BMP1							111175	986	6.88703	1.94207	0.535639	-6.27822	-0.00709939	152	0.154158	959.4	0.973022	964.36	0.978053	1043.03	1.05784	0.0486815	0.0415822	0.0689655	0.0649087	0.0527383	0.0872211	0.0273834	0.0365112	0.0588235	0.0588235	0.010142	0.0324544	0.0537525	0.0334686	0.0679513	0.0811359	0.0517241	0.0638945	0.0162272	0.0436105	Q99422	BMP1	Homo sapiens (Human).	Cleaves the C-terminal propeptides of procollagen I, II and III. Induces cartilage and bone formation. May participate in dorsoventral patterning during early development by cleaving chordin (CHRD). Responsible for the proteolytic activation of lysyl oxidase LOX.	Interacts with POSTN, the interaction promotes deposition on the extracellular matrix (By similarity).	N/A
BST1_HUMAN	ADP-ribosyl cyclase 2	BST1	1		0.5	100	0.5	100	35700.3	318	7.86352	1.86088	0.555503	2.16985	0.00628931	44	0.138365	323.63	1.0177	316.54	0.995409	316.63	0.995692	0.0849057	0.0345912	0.0597484	0.0503145	0.0377358	0.0566038	0.0220126	0.0471698	0.0503145	0.128931	0.0188679	0.0408805	0.0471698	0.0408805	0.0660377	0.0880503	0.0314465	0.0440252	0.0188679	0.0314465	Q10588	BST1	Homo sapiens (Human).	Synthesizes the second messagers cyclic ADP-ribose and nicotinate-adenine dinucleotide phosphate, the former a second messenger that elicits calcium release from intracellular stores. May be involved in pre-B-cell growth.	Homodimer.	N/A
BTD_HUMAN	Biotinidase	BTD	0.9	1	0.6	0.7	0.7	0.9	61091.4	543	6.22094	1.58832	0.567661	-14.4906	-0.0294659	66	0.121547	547.49	1.00827	560.16	1.0316	532.23	0.980166	0.0755064	0.0294659	0.0497238	0.0570902	0.0626151	0.0699816	0.0441989	0.0478821	0.0349908	0.0994475	0.0239411	0.0441989	0.0515654	0.0313076	0.0423573	0.0515654	0.053407	0.0736648	0.0128913	0.0441989	P43251	BTD	Homo sapiens (Human).	Catalytic release of biotin from biocytin, the product of biotin-dependent carboxylases degradation.	N/A	N/A
C163A_HUMAN	Scavenger receptor cysteine-rich type 1 protein M130	CD163	1	1	1	0.9	1.2	0.8	125366	1156	5.83602	1.63133	0.548521	-33.6049	-0.0294118	144	0.124567	1134.21	0.981151	1131.76	0.979031	1197.11	1.03556	0.0640138	0.0640138	0.0527682	0.067474	0.0242215	0.111592	0.033737	0.0415225	0.0415225	0.0735294	0.0138408	0.0415225	0.0276817	0.0397924	0.049308	0.0977509	0.0467128	0.0657439	0.0354671	0.00778547	Q86VB7	CD163	Homo sapiens (Human).	Acute phase-regulated receptor involved in clearance and endocytosis of hemoglobin/haptoglobin complexes by macrophages and may thereby protect tissues from free hemoglobin-mediated oxidative damage. May play a role in the uptake and recycling of iron, via endocytosis of hemoglobin/haptoglobin and subsequent breakdown of heme. Binds hemoglobin/haptoglobin complexes in a calcium-dependent and pH-d…	Interacts with CSNK2B.	N/A
C1QA_HUMAN	Complement C1q subcomponent subunit A	C1QA	0.8	0.9	0.7	1.2	0.6	0.9	25999.8	245	9.45143	1.68559	0.519224	6.97258	0.0285714	29	0.118367	228.35	0.932041	239.37	0.97702	266.99	1.08976	0.0408163	0.0204082	0.0367347	0.044898	0.0408163	0.167347	0.00816327	0.0530612	0.0489796	0.0612245	0.0163265	0.0285714	0.0897959	0.0612245	0.0612245	0.0734694	0.0367347	0.0734694	0.0122449	0.0244898	P02745	C1QA	Homo sapiens (Human).	C1q associates with the proenzymes C1r and C1s to yield C1, the first component of the serum complement system. The collagen-like regions of C1q interact with the Ca(2+)-dependent C1r(2)C1s(2) proenzyme complex, and efficient activation of C1 takes place on interaction of the globular heads of C1q with the Fc regions of IgG or IgM antibody present in immune complexes.	C1 is a calcium-dependent trimolecular complex of C1q, R and S in the molar ration of 1:2:2. C1q subcomponent is composed of nine subunits, six of which are disulfide-linked dimers of the A and B chains, and three of which are disulfide-linked dimers of the C chain.	P02746:C1QB; NbExp=4; IntAct=EBI-1220209, EBI-2813376;
C1QB_HUMAN	Complement C1q subcomponent subunit B	C1QB	1.1	1.2	0.9	1.1	1.1	1.3	26704	253	8.86813	1.51953	0.520553	4.1052	0.0158103	27	0.106719	238.7	0.943478	244.28	0.965534	273.65	1.08162	0.055336	0.0158103	0.0395257	0.0395257	0.0434783	0.158103	0.0118577	0.055336	0.0592885	0.083004	0.0395257	0.0474308	0.102767	0.0355731	0.0355731	0.0434783	0.0592885	0.0434783	0.00395257	0.027668	P02746	C1QB	Homo sapiens (Human).	C1q associates with the proenzymes C1r and C1s to yield C1, the first component of the serum complement system. The collagen-like regions of C1q interact with the Ca(2+)-dependent C1r(2)C1s(2) proenzyme complex, and efficient activation of C1 takes place on interaction of the globular heads of C1q with the Fc regions of IgG or IgM antibody present in immune complexes.	C1 is a calcium-dependent trimolecular complex of C1q, c1r and C1s in the molar ration of 1:2:2. C1q subcomponent is composed of nine subunits, six of which are disulfide-linked dimers of the A and B chains, and three of which are disulfide- linked dimers of the C chain.	P02745:C1QA; NbExp=4; IntAct=EBI-2813376, EBI-1220209;
C1QC_HUMAN	Complement C1q subcomponent subunit C	C1QC	0.9	0.9	0.8	0.8	0.8	0.9	25756.5	245	8.58311	1.35069	0.525633	3.36983	0.0122449	25	0.102041	223.56	0.91249	240.69	0.982408	268.51	1.09596	0.0326531	0.0163265	0.0367347	0.0285714	0.0367347	0.167347	0.0244898	0.0285714	0.0489796	0.110204	0.0244898	0.0367347	0.122449	0.0408163	0.0285714	0.0489796	0.0489796	0.0734694	0.00408163	0.0408163	P02747	C1QC	Homo sapiens (Human).	C1q associates with the proenzymes C1r and C1s to yield C1, the first component of the serum complement system. The collagen-like regions of C1q interact with the Ca(2+)-dependent C1r(2)C1s(2) proenzyme complex, and efficient activation of C1 takes place on interaction of the globular heads of C1q with the Fc regions of IgG or IgM antibody present in immune complexes.	C1 is a calcium-dependent trimolecular complex of C1q, R and S in the molar ration of 1:2:2. C1q subcomponent is composed of nine subunits, six of which are disulfide-linked dimers of the A and B chains, and three of which are disulfide-linked dimers of the C chain.	N/A
C1QR1_HUMAN	Complement component C1q receptor	CD93	1		0.6		0.6		68514.2	652	5.09563	1.46845	0.525844	-16.8547	-0.0245399	65	0.0996933	621.46	0.95316	615.17	0.943512	704.19	1.08005	0.0766871	0.0659509	0.0490798	0.0582822	0.0276074	0.118098	0.0168712	0.0107362	0.0429448	0.0935583	0.0107362	0.0322086	0.0812883	0.041411	0.0398773	0.0904908	0.0582822	0.0521472	0.0138037	0.0199387	Q9NPY3	CD93	Homo sapiens (Human).	Receptor (or element of a larger receptor complex) for C1q, mannose-binding lectin (MBL2) and pulmonary surfactant protein A (SPA). May mediate the enhancement of phagocytosis in monocytes and macrophages upon interaction with soluble defense collagens. May play a role in intercellular adhesion.	Interacts with HCV core protein. Interacts with C1QBP; the association may represent a cell surface C1q receptor.	N/A
C1RL_HUMAN	Complement C1r subcomponent-like protein	C1RL	1	1	1	0.9	1.4	1.2	53463	487	7.20097	1.58419	0.539014	-1.09555	-0.00410678	57	0.117043	471.47	0.968111	485.08	0.996057	506.94	1.04094	0.0657084	0.026694	0.0431211	0.0451745	0.0328542	0.102669	0.0328542	0.0287474	0.0349076	0.0862423	0.0164271	0.0390144	0.0718686	0.0595483	0.0492813	0.0800821	0.0492813	0.073922	0.0287474	0.0328542	Q9NZP8	C1RL	Homo sapiens (Human).	Mediates the proteolytic cleavage of HP/haptoglobin in the endoplasmic reticulum.	N/A	N/A
C1R_HUMAN	Complement C1r subcomponent	C1R	0.8	0.9	0.9	0.9	0.9	1	80065	705	6.14324	1.78404	0.539262	-12.5135	-0.0184397	89	0.126241	687.84	0.97566	704	0.998582	732.44	1.03892	0.0425532	0.0382979	0.0567376	0.0624113	0.0496454	0.0865248	0.0255319	0.0439716	0.0510638	0.0822695	0.0198582	0.0468085	0.0624113	0.058156	0.0496454	0.0539007	0.0524823	0.0510638	0.0141844	0.0524823	P00736	C1R	Homo sapiens (Human).	C1r B chain is a serine protease that combines with C1q and C1s to form C1, the first component of the classical pathway of the complement system.	C1 is a calcium-dependent trimolecular complex of C1q, C1r and C1s in the molar ration of 1:2:2. C1r is a dimer of identical chains, each of which is activated by cleavage into two chains, A and B, connected by disulfide bonds.	P09871:C1S; NbExp=3; IntAct=EBI-3926504, EBI-2810045;
C1S_HUMAN	Complement C1s subcomponent	C1S	0.8	0.7	0.9	0.9	0.8	0.9	76633.5	688	4.58629	1.65307	0.538881	-31.1285	-0.0450581	74	0.107558	671.89	0.976584	679.83	0.988125	720.75	1.0476	0.0537791	0.0392442	0.059593	0.0770349	0.0465116	0.0886628	0.0159884	0.0450581	0.0537791	0.059593	0.0188953	0.0494186	0.0712209	0.0276163	0.0377907	0.0625	0.0479651	0.0784884	0.0203488	0.0465116	Q9UCV3	C1S	Homo sapiens (Human).	C1s B chain is a serine protease that combines with C1q and C1r to form C1, the first component of the classical pathway of the complement system. C1r activates C1s so that it can, in turn, activate C2 and C4.	C1 is a calcium-dependent trimolecular complex of C1q, C1r and C1s in the molar ration of 1:2:2. Activated C1s is an disulfide-linked heterodimer of a heavy chain and a light chain.	Self; NbExp=2; IntAct=EBI-2810045, EBI-2810045; P00736:C1R; NbExp=3; IntAct=EBI-2810045, EBI-3926504;
C4BPA_HUMAN	C4b-binding protein alpha chain	C4BPA	0.8	0.8	1	1.1	1.1	0.9	66987.8	597	7.31316	1.75625	0.538275	-0.0126315	0	81	0.135678	570.05	0.954858	588.65	0.986013	627.84	1.05166	0.038526	0.0603015	0.040201	0.0670017	0.0351759	0.0686767	0.0284757	0.0485762	0.0569514	0.0653266	0.0117253	0.0335008	0.0871022	0.0368509	0.0502513	0.0854271	0.0686767	0.0552764	0.0201005	0.041876	P04003	C4BPA	Homo sapiens (Human).	Controls the classical pathway of complement activation. It binds as a cofactor to C3b/C4b inactivator (C3bINA), which then hydrolyzes the complement fragment C4b. It also accelerates the degradation of the C4bC2a complex (C3 convertase) by dissociating the complement fragment C2a. Alpha chain binds C4b. It interacts also with anticoagulant protein S and with serum amyloid P component.	Disulfide-linked complex of alpha and beta chains of 3 possible sorts: a 570 kDa complex of 7 alpha chains and 1 beta chain, a 530 kDa homoheptamer of alpha chains or a 500 kDa complex of 6 alpha chains and 1 beta chain. The central body of the alpha chain homopolymer supports tentacles, each with the binding site for C4b at the end.	P13050:arp4 (xeno); NbExp=5; IntAct=EBI-978348, EBI-978341;
CA2D1_HUMAN	Voltage-dependent calcium channel subunit alpha-2/delta-1	CACNA2D1		1		0.6		1.2	124488	1103	4.88578	1.78547	0.540127	-26.7963	-0.0244787	125	0.113327	1102.19	0.999266	1121.39	1.01667	1121.44	1.01672	0.0607434	0.0181324	0.0698096	0.0580236	0.0444243	0.0589302	0.0099728	0.06165	0.0598368	0.0915684	0.0154125	0.0698096	0.0471442	0.0417044	0.0435177	0.0652765	0.0543971	0.0698096	0.0154125	0.0444243	P54289	CACNA2D1	Homo sapiens (Human).	The alpha-2/delta subunit of voltage-dependent calcium channels regulates calcium current density and activation/inactivation kinetics of the calcium channel. Plays an important role in excitation-contraction coupling (By similarity).	Dimer formed of alpha-2-1 and delta-1 chains; disulfide- linked. Voltage-dependent calcium channels are multisubunit complexes, consisting of alpha-1 (CACNA1), alpha-2 (CACNA2D), beta (CACNB) and delta (CACNA2D) subunits in a 1:1:1:1 ratio (By similarity).	N/A
CAD13_HUMAN	Cadherin-13	CDH13	1	1	0.9	0.8	0.9	1.4	78236.6	713	4.57306	1.64279	0.532777	-30.1903	-0.0434783	74	0.103787	707.78	0.992679	723.92	1.01532	725.97	1.01819	0.058906	0.0112202	0.0799439	0.0504909	0.0378682	0.056101	0.0168303	0.0603086	0.0476858	0.0911641	0.0182328	0.058906	0.0729313	0.0364656	0.0392707	0.0603086	0.0799439	0.0967742	0.00420757	0.0224404	P55290	CDH13	Homo sapiens (Human).	Cadherins are calcium-dependent cell adhesion proteins. They preferentially interact with themselves in a homophilic manner in connecting cells; cadherins may thus contribute to the sorting of heterogeneous cell types. May act as a negative regulator of neural cell growth.	By contrast to classical cadherins, homodimerization in trans is not mediated by cadherin EC1 domain strand-swapping, but instead through a homophilic adhesive interface which joins two elongated EC1-EC2 domains through a region near their Ca2+-binding sites to form a tetrahedral, X-like shape (By similarity).	N/A
CADH1_HUMAN	Cadherin-1	CDH1	1	1	1	0.6	0.9	1.2	97394.4	882	4.32571	1.68786	0.524989	-53.0591	-0.0612245	87	0.0986395	877.54	0.994943	878.95	0.996542	904.25	1.02523	0.0668934	0.00907029	0.0770975	0.0680272	0.037415	0.0612245	0.0147392	0.0544218	0.0396825	0.0861678	0.0113379	0.0566893	0.0725624	0.0351474	0.0442177	0.0544218	0.0907029	0.0793651	0.0113379	0.0294785	P12830	CDH1	Homo sapiens (Human).	Cadherins are calcium-dependent cell adhesion proteins. They preferentially interact with themselves in a homophilic manner in connecting cells; cadherins may thus contribute to the sorting of heterogeneous cell types. CDH1 is involved in mechanisms regulating cell-cell adhesions, mobility and proliferation of epithelial cells. Has a potent invasive suppressor role. It is a ligand for integrin al…	Homodimer; disulfide-linked. Component of an E-cadherin/ catenin adhesion complex composed of at least E-cadherin/CDH1, beta-catenin/CTNNB1 or gamma-catenin/JUP, and potentially alpha- catenin/CTNNA1; the complex is located to adherens junctions. The stable association of CTNNA1 is controversial as CTNNA1 was shown not to bind to F-actin when assembled in the complex. Alternatively, the CTNNA1-co…	Q9JIY2:Cbll1 (xeno); NbExp=21; IntAct=EBI-727477, EBI-7644904; P30260:CDC27; NbExp=2; IntAct=EBI-727477, EBI-994813; P35222:CTNNB1; NbExp=7; IntAct=EBI-727477, EBI-491549; P11362:FGFR1; NbExp=2; IntAct=EBI-727477, EBI-1028277; P62136:PPP1CA; NbExp=2; IntAct=EBI-727477, EBI-357253; Q15139:PRKD1; NbExp=7; IntAct=EBI-727477, EBI-1181072; P12931:SRC; NbExp=2; IntAct=EBI-727477, EBI-621482; Q68CZ2:TNS…
CADH2_HUMAN	Cadherin-2	CDH2		1		0.4		1.6	99745.8	906	4.39735	1.67848	0.525828	-46.1626	-0.0518764	90	0.0993377	898.79	0.992042	901.17	0.994669	935.47	1.03253	0.0695364	0.00883002	0.0816777	0.0562914	0.0309051	0.0640177	0.013245	0.0761589	0.0419426	0.0783664	0.01766	0.0629139	0.0772627	0.0463576	0.0441501	0.0573951	0.0640177	0.0717439	0.00883002	0.0286976	P19022	CDH2	Homo sapiens (Human).	Cadherins are calcium-dependent cell adhesion proteins. They preferentially interact with themselves in a homophilic manner in connecting cells; cadherins may thus contribute to the sorting of heterogeneous cell types. CDH2 may be involved in neuronal recognition mechanism. In hippocampal neurons, may regulate dendritic spine density (By similarity).	Interacts with CDCP1. Identified in a complex containing FGFR4, NCAM1, CDH2, PLCG1, FRS2, SRC, SHC1, GAP43 and CTTN. Interacts with PCDH8; this complex may also include TAOK2. The interaction with PCDH8 may lead to internalization through TAOK2/p38 MAPK pathway (By similarity).	P35222:CTNNB1; NbExp=2; IntAct=EBI-2256711, EBI-491549;
CADH5_HUMAN	Cadherin-5	CDH5	1	1	0.7	0.7	0.7	0.8	87472	784	5.07492	1.82168	0.529209	-29.0852	-0.0395408	105	0.133929	792.32	1.01061	780.99	0.996161	797.9	1.01773	0.0714286	0.00765306	0.0778061	0.0663265	0.0369898	0.0625	0.0293367	0.0612245	0.0535714	0.0714286	0.0191327	0.0433673	0.0548469	0.0395408	0.0510204	0.059949	0.0714286	0.0790816	0.00637755	0.0369898	P33151	CDH5	Homo sapiens (Human).	Cadherins are calcium-dependent cell adhesion proteins. They preferentially interact with themselves in a homophilic manner in connecting cells; cadherins may thus contribute to the sorting of heterogeneous cell types. This cadherin may play a important role in endothelial cell biology through control of the cohesion and organization of the intercellular junctions. It associates with alpha-cateni…	Interacts (via cadherin 5 domain) with PTPRB (By similarity). Interacts with TRPC4. Interacts with KRIT1. Interacts with PARD3 (By similarity).	P35222:CTNNB1; NbExp=6; IntAct=EBI-2903122, EBI-491549; Q8TEW0:PARD3; NbExp=5; IntAct=EBI-2903122, EBI-81968; Q9NPB6:PARD6A; NbExp=4; IntAct=EBI-2903122, EBI-81876;
CAH1_HUMAN	Carbonic anhydrase 1	CA1	0.9	0.9	1.2	1	1.9	1.4	28851.5	261	7.1357	1.59533	0.528851	-1.0272	-0.00766284	36	0.137931	256.9	0.984291	253.48	0.971188	275.66	1.05617	0.0727969	0.00383142	0.0536398	0.0498084	0.0421456	0.0613027	0.0421456	0.0383142	0.0689655	0.0766284	0.0114943	0.0651341	0.0651341	0.0344828	0.0268199	0.114943	0.0536398	0.0651341	0.0229885	0.0306513	P00915	CA1	Homo sapiens (Human).	Reversible hydration of carbon dioxide. Can hydrates cyanamide to urea.	N/A	N/A
CAH2_HUMAN	Carbonic anhydrase 2	CA2	0.9	1	1.2	1.4	1.7	1.8	29226.9	260	7.4657	1.72927	0.529615	0.0654339	-0.00384615	43	0.165385	258.38	0.993769	253.5	0.975	272.04	1.04631	0.05	0.00384615	0.0730769	0.05	0.0461538	0.0846154	0.0461538	0.0346154	0.0923077	0.1	0.00769231	0.0384615	0.0653846	0.0423077	0.0269231	0.0692308	0.0461538	0.0653846	0.0269231	0.0307692	P00918	CA2	Homo sapiens (Human).	Essential for bone resorption and osteoclast differentiation (By similarity). Reversible hydration of carbon dioxide. Can hydrate cyanamide to urea. Involved in the regulation of fluid secretion into the anterior chamber of the eye. Contributes to intracellular pH regulation in the duodenal upper villous epithelium during proton-coupled peptide absorption. Stimulates the chloride-bicarbonate exch…	Interacts with SLC4A4. Interaction with SLC4A7 regulates SLC4A7 transporter activity. Interacts with SLC26A6 isoform 4 (via C-terminus cytoplasmic domain).	N/A
CALD1_HUMAN	Caldesmon	CALD1	1.2	1.1	1.2	0.6	1.8	1.2	93174	793	5.3467	3.00121	0.46319	-15.2096	-0.0201765	196	0.247163	898.42	1.13294	662.73	0.835725	807.28	1.01801	0.0794451	0.00126103	0.0441362	0.215637	0.0163934	0.035309	0.0075662	0.0290038	0.131148	0.0441362	0.0151324	0.0264817	0.0302648	0.0592686	0.108449	0.0542245	0.0491803	0.0416141	0.00630517	0.00504414	Q05682	CALD1	Homo sapiens (Human).	Actin- and myosin-binding protein implicated in the regulation of actomyosin interactions in smooth muscle and nonmuscle cells (could act as a bridge between myosin and actin filaments). Stimulates actin binding of tropomyosin which increases the stabilization of actin filament structure. In muscle tissues, inhibits the actomyosin ATPase by binding to F-actin. This inhibition is attenuated by cal…	N/A	N/A
CALM_HUMAN	Calmodulin	CALM1	1.1	1.1	0.8	1.1	1.1	0.9	16826.7	149	3.84007	1.98477	0.514027	-23.8661	-0.161074	15	0.100671	163.66	1.09839	137.9	0.925503	148.69	0.997919	0.0738255	0	0.114094	0.14094	0.0536913	0.0738255	0.00671141	0.0536913	0.0536913	0.0604027	0.0671141	0.0402685	0.0134228	0.0402685	0.0402685	0.0268456	0.0805369	0.0469799	0	0.0134228	Q96HK3	CALM3	Homo sapiens (Human).	Calmodulin mediates the control of a large number of enzymes, ion channels, aquaporins and other proteins by Ca(2+). Among the enzymes to be stimulated by the calmodulin-Ca(2+) complex are a number of protein kinases and phosphatases. Together with CCP110 and centrin, is involved in a genetic pathway that regulates the centrosome cycle and progression through cytokinesis.	Interacts with MYO1C, MYO5A and RRAD. Interacts with MYO10 (By similarity). Interacts with CEP97, CCP110, TTN/titin and SRY. Interacts with USP6; the interaction is calcium dependent. Interacts with CDK5RAP2. Interacts with SCN5A. Interacts with RYR1 and RYR2. Interacts with FCHO1. Interacts with MIP in a 1:2 stoichiometry; the interaction with the cytoplasmic domains from two MIP subunits promot…	P29274:ADORA2A; NbExp=3; IntAct=EBI-397435, EBI-2902702; P49407:ARRB1; NbExp=3; IntAct=EBI-397435, EBI-743313; P32121:ARRB2; NbExp=3; IntAct=EBI-397435, EBI-714559; Q13936:CACNA1C; NbExp=12; IntAct=EBI-397435, EBI-1038838; O43303:CCP110; NbExp=9; IntAct=EBI-397435, EBI-1566217; P40136:cya (xeno); NbExp=8; IntAct=EBI-397435, EBI-457011; P00533:EGFR; NbExp=3; IntAct=EBI-397435, EBI-297353; P25445:F…
CALR_HUMAN	Calreticulin	CALR	1.1	1.1	0.8	1.4	1.1	1.5	48111	417	4.04337	1.95353	0.499041	-58.3913	-0.141487	57	0.136691	432.72	1.0377	372.07	0.892254	450.21	1.07964	0.0383693	0.00719424	0.131894	0.129496	0.0431655	0.0647482	0.0167866	0.0455635	0.100719	0.0623501	0.0119904	0.0383693	0.0647482	0.0359712	0.0191847	0.0479616	0.0359712	0.0455635	0.0263789	0.0335731	P27797	CALR	Homo sapiens (Human).	Calcium-binding chaperone that promotes folding, oligomeric assembly and quality control in the endoplasmic reticulum (ER) via the calreticulin/calnexin cycle. This lectin interacts transiently with almost all of the monoglucosylated glycoproteins that are synthesized in the ER. Interacts with the DNA-binding domain of NR3C1 and mediates its nuclear export. Involved in maternal gene expression re…	Monomer. Component of an EIF2 complex at least composed of CELF1/CUGBP1, CALR, CALR3, EIF2S1, EIF2S2, HSP90B1 and HSPA5. Interacts with PDIA3/ERp57 (By similarity). Interacts with NR3C1 and TRIM21. Interacts with GABARAP. Interacts with PPIB.	Q03518:TAP1; NbExp=2; IntAct=EBI-1049597, EBI-747259;
CALU_HUMAN	Calumenin	CALU	1		1		0.9		37082.7	315	4.23278	2.13927	0.517619	-39.1073	-0.126984	52	0.165079	337.1	1.07016	291.47	0.925302	325.63	1.03375	0.0539683	0.00634921	0.146032	0.114286	0.0539683	0.0507937	0.031746	0.0349206	0.0920635	0.0666667	0.0285714	0.0253968	0.0253968	0.0349206	0.0412698	0.0349206	0.0444444	0.0539683	0.0190476	0.0412698	O60456	CALU	Homo sapiens (Human).	Involved in regulation of vitamin K-dependent carboxylation of multiple N-terminal glutamate residues. Seems to inhibit gamma-carboxylase GGCX. Binds 7 calcium ions with a low affinity (By similarity).	Interacts with GGCX (By similarity).	N/A
CAMP_HUMAN	Cathelicidin antimicrobial peptide	CAMP	1		1.9		2.2		19288.9	170	10.0305	2.27353	0.533118	7.92559	0.0470588	31	0.182353	171.58	1.00929	169.15	0.995	172.99	1.01759	0.0411765	0.0235294	0.0941176	0.0352941	0.0470588	0.0588235	0.00588235	0.0470588	0.0882353	0.117647	0.0235294	0.0294118	0.0529412	0.0411765	0.0882353	0.0647059	0.0588235	0.0647059	0.00588235	0.0117647	P49913	CAMP	Homo sapiens (Human).	Binds to bacterial lipopolysaccharides (LPS), has antibacterial activity.	N/A	P08069:IGF1R; NbExp=3; IntAct=EBI-6378485, EBI-475981;
CAP1_HUMAN	Adenylyl cyclase-associated protein 1	CAP1	1	1	1	1.1	1.2	1.9	51867.5	475	8.20056	1.69244	0.523537	3.68763	0.00631579	67	0.141053	481.66	1.01402	463.6	0.976	486.68	1.02459	0.08	0.0168421	0.0421053	0.0694737	0.0231579	0.0589474	0.0231579	0.0505263	0.0926316	0.0778947	0.0210526	0.0421053	0.0736842	0.04	0.0252632	0.0884211	0.0526316	0.0842105	0.0126316	0.0252632	Q01518	CAP1	Homo sapiens (Human).	Directly regulates filament dynamics and has been implicated in a number of complex developmental and morphological processes, including mRNA localization and the establishment of cell polarity.	Homodimer. Binds actin monomers.	N/A
CAPG_HUMAN	Macrophage-capping protein	CAPG	1		0.7	62.9	0.6	100	38473.7	348	6.11523	1.74741	0.529138	-5.45461	-0.0172414	46	0.132184	358.59	1.03043	338.85	0.973707	352.03	1.01158	0.091954	0.0143678	0.0517241	0.0747126	0.0431034	0.0833333	0.0229885	0.045977	0.0689655	0.0890805	0.0143678	0.045977	0.0517241	0.066092	0.0402299	0.0603448	0.0316092	0.0632184	0.0172414	0.0229885	P40121	CAPG	Homo sapiens (Human).	Calcium-sensitive protein which reversibly blocks the barbed ends of actin filaments but does not sever preformed actin filaments. May play an important role in macrophage function. May play a role in regulating cytoplasmic and/or nuclear structures through potential interactions with actin. May bind DNA.	N/A	N/A
CATA_HUMAN	Catalase	CAT	1.1	1	1.3	1	1.7	1.4	59717.1	527	7.41288	1.81827	0.532922	-0.140889	-0.00379507	81	0.1537	525.45	0.997059	521.8	0.990133	545.22	1.03457	0.0796964	0.00759013	0.0683112	0.0474383	0.0607211	0.0645161	0.0417457	0.0455408	0.056926	0.056926	0.0189753	0.0626186	0.0702087	0.0493359	0.0550285	0.0474383	0.0455408	0.0702087	0.0113852	0.0398482	P04040	CAT	Homo sapiens (Human).	Occurs in almost all aerobically respiring organisms and serves to protect cells from the toxic effects of hydrogen peroxide. Promotes growth of cells including T-cells, B-cells, myeloid leukemia cells, melanoma cells, mastocytoma cells and normal and transformed fibroblast cells.	Homotetramer.	N/A
CATD_HUMAN	Cathepsin D	CTSD	1	1	1.1	0.8	1.5	1.3	44522.8	412	6.50461	1.50286	0.545728	-2.83963	-0.00728155	41	0.0995146	404.83	0.982597	420.89	1.02158	420.56	1.02078	0.0679612	0.0218447	0.0509709	0.0412621	0.0339806	0.0946602	0.0145631	0.0558252	0.0558252	0.0995146	0.0242718	0.026699	0.0631068	0.0412621	0.0291262	0.0898058	0.0509709	0.0825243	0.00970874	0.0461165	P07339	CTSD	Homo sapiens (Human).	Acid protease active in intracellular protein breakdown. Involved in the pathogenesis of several diseases such as breast cancer and possibly Alzheimer disease.	Consists of a light chain and a heavy chain.	P05067:APP; NbExp=2; IntAct=EBI-2115097, EBI-77613;
CBG_HUMAN	Corticosteroid-binding globulin	SERPINA6	1	1	1	1	1.1	1.1	45110.9	405	5.94502	1.5021	0.564494	-8.11059	-0.0222222	38	0.0938272	412.94	1.0196	425.24	1.04998	391.5	0.966667	0.0666667	0.00740741	0.0493827	0.0395062	0.0567901	0.054321	0.0271605	0.054321	0.0419753	0.125926	0.037037	0.054321	0.0345679	0.0469136	0.0246914	0.091358	0.0716049	0.0716049	0.0148148	0.0296296	P08185	SERPINA6	Homo sapiens (Human).	Major transport protein for glucocorticoids and progestins in the blood of almost all vertebrate species.	N/A	N/A
CBPB2_HUMAN	Carboxypeptidase B2	CPB2	1	1	1.1	1.2	1.1	0.9	48392.1	423	7.76744	1.74449	0.563924	2.02828	0.00236407	58	0.137116	425.41	1.0057	444.54	1.05092	414.45	0.979787	0.0685579	0.0236407	0.0401891	0.0567376	0.0425532	0.0472813	0.0378251	0.0756501	0.0543735	0.0780142	0.0118203	0.0449173	0.035461	0.0401891	0.0449173	0.0898345	0.0472813	0.0780142	0.0236407	0.0591017	Q96IY4	CPB2	Homo sapiens (Human).	Cleaves C-terminal arginine or lysine residues from biologically active peptides such as kinins or anaphylatoxins in the circulation thereby regulating their activities. Down- regulates fibrinolysis by removing C-terminal lysine residues from fibrin that has already been partially degraded by plasmin.	N/A	N/A
CBPN_HUMAN	Carboxypeptidase N catalytic chain	CPN1	1.1	1.1	1	1.2	1	1.3	52251.6	458	7.36182	1.8619	0.545677	-0.368046	-0.00436681	68	0.148472	453.2	0.98952	461.14	1.00686	466.34	1.01821	0.0524017	0.010917	0.0458515	0.0633188	0.0414847	0.0742358	0.0436681	0.0371179	0.0371179	0.0982533	0.0218341	0.0655022	0.0655022	0.0414847	0.0676856	0.0524017	0.0414847	0.0786026	0.0131004	0.0480349	P15169	CPN1	Homo sapiens (Human).	Protects the body from potent vasoactive and inflammatory peptides containing C-terminal Arg or Lys (such as kinins or anaphylatoxins) which are released into the circulation.	Tetramer of two catalytic chains and two glycosylated inactive chains.	N/A
CD109_HUMAN	CD109 antigen	CD109	1		2.3		3.7		161584	1445	5.62228	1.67747	0.54681	-23.4081	-0.017301	154	0.106574	1450.4	1.00374	1493.19	1.03335	1439.78	0.996388	0.050519	0.0110727	0.0456747	0.0615917	0.050519	0.0553633	0.016609	0.0595156	0.0560554	0.100346	0.0186851	0.0532872	0.0429066	0.0449827	0.03391	0.0975779	0.0719723	0.0802768	0.0124567	0.0366782	Q6MZI7	CD109	Homo sapiens (Human).	Modulates negatively TGFB1 signaling in keratinocytes.	Heterodimer; disulfide-linked. Interacts with TGFB1 and TGFBR1. Forms a heteromeric complex with TGFBR1, TGFBR2 and TGFBR3 in a ligand-independent manner.	N/A
CD14_HUMAN	Monocyte differentiation antigen CD14	CD14	1	1	1.2	0.9	1.5	1.2	40050	375	6.16308	1.55843	0.549253	-4.81502	-0.0133333	38	0.101333	383.56	1.02283	368.94	0.98384	368.85	0.9836	0.114667	0.0293333	0.0426667	0.0533333	0.0266667	0.064	0.0186667	0.0106667	0.024	0.165333	0.016	0.04	0.08	0.0373333	0.0586667	0.0773333	0.048	0.0746667	0.0133333	0.00533333	P08571	CD14	Homo sapiens (Human).	In concert with LBP, binds to monomeric lipopolysaccharide and delivers it to the MD-2/TLR4 complex, thereby mediating the innate immune response to bacterial lipopolysaccharide (LPS). Acts via MyD88, TIRAP and TRAF6, leading to NF-kappa-B activation, cytokine secretion and the inflammatory response. Up-regulates cell surface molecules, including adhesion molecules.	Belongs to the lipopolysaccharide (LPS) receptor, a multi-protein complex containing at least CD14, MD-2 and TLR4.	Q12841:FSTL1; NbExp=3; IntAct=EBI-3905196, EBI-2349801;
CD166_HUMAN	CD166 antigen	ALCAM	1	1	0.6	0.7	0.9	0.6	65059.9	583	6.1516	1.78504	0.53163	-5.75394	-0.0102916	73	0.125214	581.85	0.998027	587.6	1.00789	593.66	1.01828	0.0497427	0.0205832	0.0480274	0.0737564	0.0274443	0.0548885	0.0137221	0.0720412	0.0789022	0.0823328	0.0188679	0.0531732	0.0548885	0.0325901	0.0325901	0.0857633	0.0754717	0.0720412	0.0102916	0.0428816	Q13740	ALCAM	Homo sapiens (Human).	Cell adhesion molecule that binds to CD6. Involved in neurite extension by neurons via heterophilic and homophilic interactions. May play a role in the binding of T- and B-cells to activated leukocytes, as well as in interactions between cells of the nervous system.	N/A	N/A
CD44_HUMAN	CD44 antigen	CD44	1.1	1.1	0.7	1	0.6	1	81484.9	742	4.99851	1.661	0.513437	-39.2116	-0.0566038	88	0.118598	717.06	0.966388	706.06	0.951563	795.19	1.07168	0.0566038	0.0121294	0.0619946	0.0673854	0.0309973	0.0687332	0.0458221	0.0458221	0.0269542	0.0512129	0.0188679	0.0552561	0.0592992	0.0363881	0.0458221	0.117251	0.122642	0.0377358	0.0202156	0.0188679	Q9UCB0	CD44	Homo sapiens (Human).	Receptor for hyaluronic acid (HA). Mediates cell-cell and cell-matrix interactions through its affinity for HA, and possibly also through its affinity for other ligands such as osteopontin, collagens, and matrix metalloproteinases (MMPs). Adhesion with HA plays an important role in cell migration, tumor growth and progression. In cancer cells, may play an important role in invadopodia formation. …	Interacts with PKN2. Interacts with TIAM1 and TIAM2 (By similarity). Interacts with HA, as well as other glycosaminoglycans, collagen, laminin, and fibronectin via its N- terminal segment. Interacts with ANK, the ERM proteins (VIL2, RDX and MSN), and NF2 via its C-terminal segment.	P18011:ipaB (xeno); NbExp=4; IntAct=EBI-490245, EBI-490239; P26038:MSN; NbExp=6; IntAct=EBI-490245, EBI-528768; Q9UPY5:SLC7A11; NbExp=4; IntAct=EBI-490245, EBI-3843348; P10451:SPP1; NbExp=2; IntAct=EBI-490245, EBI-723648;
CD5L_HUMAN	CD5 antigen-like	CD5L	1		1.3		1.4		38062.1	347	5.14615	1.74081	0.542104	-13.2457	-0.037464	46	0.132565	339.65	0.978818	338.37	0.97513	361.47	1.0417	0.0489914	0.0778098	0.0634006	0.0778098	0.0201729	0.112392	0.0288184	0.0230548	0.0461095	0.0778098	0.00576369	0.0230548	0.0432277	0.054755	0.0576369	0.0720461	0.037464	0.0835735	0.0317003	0.0144092	O43866	CD5L	Homo sapiens (Human).	May play a role in the regulation of the immune system. Seems to play a role as an inhibitor of apoptosis.	Associated with IgM.	N/A
CD97_HUMAN	CD97 antigen	CD97							91807.4	835	6.87313	1.5884	0.559234	-4.57749	-0.00479042	88	0.105389	816.41	0.977737	854.69	1.02358	839.05	1.00485	0.057485	0.0586826	0.039521	0.0502994	0.0467066	0.0778443	0.0203593	0.0467066	0.0407186	0.106587	0.0143713	0.045509	0.0491018	0.039521	0.0443114	0.0874251	0.0706587	0.0610778	0.0203593	0.0227545	P48960	CD97	Homo sapiens (Human).	Receptor potentially involved in both adhesion and signaling processes early after leukocyte activation. Plays an essential role in leukocyte migration (By similarity).	Forms a heterodimer, consisting of a large extracellular region (alpha subunit) non-covalently linked to a seven- transmembrane moiety (beta subunit). Interacts with complement decay-accelerating factor (DAF). The largest isoform (isoform 1) interacts with chondroitin sulfate.	N/A
CDHR2_HUMAN	Cadherin-related family member 2	CDHR2		1		0.8		1.1	141453	1310	4.08358	1.45708	0.540824	-87.9448	-0.0679389	92	0.070229	1305.5	0.996565	1342.67	1.02494	1325.95	1.01218	0.078626	0.00916031	0.0755725	0.0503817	0.0366412	0.0641221	0.0122137	0.0473282	0.0236641	0.0992366	0.0145038	0.0580153	0.0557252	0.0435115	0.0343511	0.0862595	0.0648855	0.108397	0.00687023	0.0305344	Q9BYE9	CDHR2	Homo sapiens (Human).	Role in contact inhibition at the lateral surface of epithelial cells.	Interacts with MAST2.	Q6P0Q8:MAST2; NbExp=4; IntAct=EBI-493793, EBI-493777;
CE162_HUMAN	Centrosomal protein of 162 kDa	KIAA1009	1		0.9		1.6		161839	1403	5.14122	2.24457	0.504455	-46.3554	-0.0349252	252	0.179615	1525.03	1.08698	1297.27	0.92464	1409.18	1.0044	0.0548824	0.00641483	0.0577334	0.135424	0.0270848	0.0270848	0.0213828	0.0427655	0.115467	0.101212	0.0242338	0.0506058	0.0256593	0.0705631	0.0427655	0.0841055	0.0449038	0.0470421	0.00427655	0.0163934	Q5TB80	CEP162	Homo sapiens (Human).	Required to promote assembly of the transition zone in primary cilia. Acts by specifically recognizing and binding the axonemal microtubule. Localizes to the distal ends of centrioles before ciliogenesis and directly binds to axonemal microtubule, thereby promoting and restricting transition zone formation specifically at the cilia base. Required to mediate CEP290 association with microtubules.	Interacts with alpha-tubulin (By similarity). Interacts with CEP290.	N/A
CERU_HUMAN	Ceruloplasmin	CP	0.9	0.9	1.2	1	0.9	0.8	122124	1065	5.50057	1.79475	0.539221	-38.8377	-0.0394366	147	0.138028	1062.06	0.997239	1065.98	1.00092	1091.84	1.0252	0.0478873	0.0140845	0.0629108	0.0760563	0.0488263	0.0723005	0.0384977	0.0544601	0.0619718	0.0694836	0.0234742	0.0497653	0.0469484	0.0309859	0.0375587	0.057277	0.0704225	0.0591549	0.0178404	0.0600939	P00450	CP	Homo sapiens (Human).	Ceruloplasmin is a blue, copper-binding (6-7 atoms per molecule) glycoprotein. It has ferroxidase activity oxidizing Fe(2+) to Fe(3+) without releasing radical oxygen species. It is involved in iron transport across the cell membrane. Provides Cu(2+) ions for the ascorbate-mediated deaminase degradation of the heparan sulfate chains of GPC1. May also play a role in fetal lung development or pulmo…	N/A	N/A
CFAB_HUMAN	Complement factor B	CFB	0.9	0.9	1.1	1.1	1.3	1.1	85476.7	764	7.06684	1.84898	0.531283	-2.36942	-0.0039267	109	0.14267	749.61	0.981165	761.37	0.996558	795.18	1.04081	0.0445026	0.0314136	0.0602094	0.0628272	0.0274869	0.0850785	0.0235602	0.0497382	0.0693717	0.0759162	0.0157068	0.039267	0.0536649	0.0471204	0.0497382	0.0732984	0.0562827	0.0746073	0.0170157	0.0431937	Q9BTF5	CFB	Homo sapiens (Human).	Factor B which is part of the alternate pathway of the complement system is cleaved by factor D into 2 fragments: Ba and Bb. Bb, a serine protease, then combines with complement factor 3b to generate the C3 or C5 convertase. It has also been implicated in proliferation and differentiation of preactivated B- lymphocytes, rapid spreading of peripheral blood monocytes, stimulation of lymphocyte blas…	Monomer.	N/A
CFAD_HUMAN	Complement factor D	CFD	0.9	0.8	0.7	0.8	1.2	1.2	27015.1	253	7.76968	1.72292	0.548972	1.61919	0.00395257	38	0.150198	254.63	1.00644	249.64	0.986719	253.4	1.00158	0.118577	0.0355731	0.0632411	0.0395257	0	0.0948617	0.0434783	0.0237154	0.0237154	0.12253	0.0118577	0.0197628	0.0632411	0.0316206	0.083004	0.0632411	0.0316206	0.0948617	0.0197628	0.0158103	P00746	CFD	Homo sapiens (Human).	Factor D cleaves factor B when the latter is complexed with factor C3b, activating the C3bbb complex, which then becomes the C3 convertase of the alternate pathway. Its function is homologous to that of C1s in the classical pathway.	N/A	N/A
CFAH_HUMAN	Complement factor H	CFH	0.9	0.9	0.9	1	1	0.9	139002	1231	6.58657	1.78998	0.53407	-13.0108	-0.00974817	163	0.132413	1169.86	0.950333	1210.81	0.983599	1311	1.06499	0.0324939	0.0666125	0.0430544	0.0763607	0.0243704	0.0779854	0.0227457	0.056052	0.0649878	0.0495532	0.0170593	0.0479285	0.0739236	0.0357433	0.0446791	0.0755483	0.0617384	0.0511779	0.021121	0.0568643	Q9NU86	CFH	Homo sapiens (Human).	Factor H functions as a cofactor in the inactivation of C3b by factor I and also increases the rate of dissociation of the C3bBb complex (C3 convertase) and the (C3b)NBB complex (C5 convertase) in the alternative complement pathway.	N/A	P01024:C3; NbExp=2; IntAct=EBI-1223708, EBI-6863145; P16946:ennX (xeno); NbExp=2; IntAct=EBI-1223708, EBI-6403567;
CFAI_HUMAN	Complement factor I	CFI	0.9	0.8	1	0.9	1.1	0.9	65705.3	583	7.52906	1.81422	0.552521	2.43941	0.0051458	84	0.144082	573.56	0.983808	594.63	1.01995	593.44	1.01791	0.0497427	0.0720412	0.0617496	0.0531732	0.0428816	0.0789022	0.0240137	0.0531732	0.0737564	0.0651801	0.0188679	0.0411664	0.0325901	0.0445969	0.0463122	0.0600343	0.0566038	0.0668954	0.0205832	0.0377358	P05156	CFI	Homo sapiens (Human).	Responsible for cleaving the alpha-chains of C4b and C3b in the presence of the cofactors C4-binding protein and factor H respectively.	Heterodimer of a light and heavy chains; disulfide- linked. The fully processed and mature protein circulates as a zymogen, and is allosterically activated by substrate-induced remodeling of the active site.	N/A
CH3L1_HUMAN	Chitinase-3-like protein 1	CHI3L1	1		1.2		1.4		42597.6	383	8.60751	1.71864	0.547598	5.51653	0.0130548	49	0.127937	379.52	0.990914	390.43	1.0194	388.58	1.01457	0.078329	0.0182768	0.0652742	0.0261097	0.0574413	0.0887728	0.0234987	0.0496084	0.0548303	0.0966057	0.0182768	0.0313316	0.0391645	0.0469974	0.0496084	0.078329	0.0678851	0.0469974	0.0208877	0.0417755	P36222	CHI3L1	Homo sapiens (Human).	Carbohydrate-binding lectin with a preference for chitin. Has no chitinase activity. May play a role in tissue remodeling and in the capacity of cells to respond to and cope with changes in their environment. Plays a role in T-helper cell type 2 (Th2) inflammatory response and IL-13-induced inflammation, regulating allergen sensitization, inflammatory cell apoptosis, dendritic cell accumulation a…	Monomer.	N/A
CHL1_HUMAN	Neural cell adhesion molecule L1-like protein	CHL1	1	1	0.7	0.8	0.9	1	134984	1208	5.52419	1.76607	0.528485	-30.8778	-0.0273179	156	0.129139	1200.22	0.99356	1188.05	0.983485	1246.32	1.03172	0.0496689	0.0157285	0.0480132	0.0827815	0.035596	0.0711921	0.0256623	0.0620861	0.0637417	0.0794702	0.0124172	0.0529801	0.0695364	0.0380795	0.0397351	0.0736755	0.0637417	0.0662252	0.0165563	0.0331126	O00533	CHL1	Homo sapiens (Human).	Extracellular matrix and cell adhesion protein that plays a role in nervous system development and in synaptic plasticity. Both soluble and membranous forms promote neurite outgrowth of cerebellar and hippocampal neurons and suppress neuronal cell death. Plays a role in neuronal positioning of pyramidal neurons and in regulation of both the number of interneurons and the efficacy of GABAergic syn…	May interact with L1CAM. May interact with ITGB1/ITGA1 heterodimer and ITGB1/ITGA2 heterodimer as well as with ANK3 (By similarity).	N/A
CHLE_HUMAN	Cholinesterase	BCHE	1.1	1	0.7	0.6	0.7	0.7	68373	602	7.47077	1.7339	0.551578	0.511521	0	71	0.11794	601.1	0.998505	612.04	1.01668	605.17	1.00527	0.0564784	0.0166113	0.0398671	0.0614618	0.0697674	0.0780731	0.0166113	0.051495	0.0614618	0.0913621	0.0215947	0.0664452	0.0498339	0.0332226	0.0398671	0.0647841	0.0614618	0.0548173	0.0315615	0.0332226	P06276	BCHE	Homo sapiens (Human).	Esterase with broad substrate specificity. Contributes to the inactivation of the neurotransmitter acetylcholine. Can degrade neurotoxic organophosphate esters.	Homotetramer; disulfide-linked. Dimer of dimers.	Self; NbExp=2; IntAct=EBI-7936069, EBI-7936069;
CI050_HUMAN	Uncharacterized protein C9orf50	C9orf50	1		0.8		1		47608.9	431	11.0247	2.13288	0.520371	28.5014	0.0649652	77	0.178654	425.93	0.988237	401.47	0.931485	451.46	1.04747	0.0858469	0.0232019	0.0394432	0.0510441	0.0301624	0.0812065	0.0232019	0.00928074	0.0440835	0.12761	0.00464037	0.0162413	0.106729	0.0556845	0.111369	0.0858469	0.0394432	0.037123	0.0185615	0.00928074	Q5SZB4	C9orf50	Homo sapiens (Human).	N/A	N/A	N/A
CLC11_HUMAN	C-type lectin domain family 11 member A	CLEC11A	1	1	1.5	0.9	2.7	0.9	35671.6	323	4.81926	1.89672	0.525666	-17.2055	-0.0557276	43	0.133127	337.18	1.0439	298.09	0.922879	325.61	1.00808	0.117647	0.0185759	0.0495356	0.105263	0.0247678	0.108359	0.0340557	0.00619195	0.0123839	0.117647	0.0123839	0.0185759	0.0619195	0.0650155	0.0866873	0.0402477	0.0340557	0.0402477	0.0278638	0.0185759	Q9Y240	CLEC11A	Homo sapiens (Human).	Stimulates the proliferation and differentiation of hematopoietic precursor cells from various lineages, including erythrocytes, lymphocytes, granulocytes and macrophages. Acts synergistically with other cytokines, including IL-3, GCSF, GMCSF and FLT3 ligand. Suppresses SCF-stimulated erythrocyte proliferation.	N/A	N/A
CLIC1_HUMAN	Chloride intracellular channel protein 1	CLIC1	1		2.6		3.2		26905.3	241	4.81632	1.79407	0.533402	-7.96159	-0.033195	30	0.124481	250.22	1.03826	237.09	0.983776	238.95	0.991494	0.0829876	0.0248963	0.0497925	0.0954357	0.0497925	0.0539419	0.0124481	0.0290456	0.0746888	0.124481	0.00829876	0.0539419	0.0580913	0.033195	0.0373444	0.0414938	0.0622407	0.0705394	0.00414938	0.033195	O00299	CLIC1	Homo sapiens (Human).	Can insert into membranes and form chloride ion channels. Channel activity depends on the pH. Membrane insertion seems to be redox-regulated and may occur only under oxydizing conditions. Involved in regulation of the cell cycle.	Monomer. Homodimer (in vitro). Interacts with TRAPPC2. Dimerization requires a conformation change that leads to the exposure of a large hydrophobic surface. In vivo, this may lead to membrane insertion. Interacts with AKAP9.	N/A
CLUS_HUMAN	Clusterin	CLU	1	0.9	1	1	1	0.9	52459.8	449	6.20826	2.11882	0.537038	-8.1936	-0.0200445	71	0.158129	467.13	1.04038	440.26	0.980535	446.44	0.994298	0.0356347	0.0222717	0.0534521	0.0957684	0.0512249	0.0311804	0.0289532	0.0289532	0.064588	0.10245	0.0356347	0.0489978	0.0445434	0.0601336	0.064588	0.0757238	0.0601336	0.0601336	0.0111359	0.0244989	P10909	CLU	Homo sapiens (Human).	Isoform 1 functions as extracellular chaperone that prevents aggregation of nonnative proteins. Prevents stress- induced aggregation of blood plasma proteins. Inhibits formation of amyloid fibrils by APP, APOC2, B2M, CALCA, CSN3, SNCA and aggregation-prone LYZ variants (in vitro). Does not require ATP. Maintains partially unfolded proteins in a state appropriate for subsequent refolding by other …	Antiparallel disulfide-linked heterodimer of an alpha chain and a beta chain. Self-associates and forms higher oligomers. Interacts with a broad range of misfolded proteins, including APP, APOC2 and LYZ. Slightly acidic pH promotes interaction with misfolded proteins. Forms high-molecular weight oligomers upon interaction with misfolded proteins. Interacts with APOA1, LRP2, CLUAP1 AND PON1. Inter…	Q07817-1:BCL2L1; NbExp=6; IntAct=EBI-4322678, EBI-287195; Q9NRI5:DISC1; NbExp=4; IntAct=EBI-1104674, EBI-529989; P01100:FOS; NbExp=2; IntAct=EBI-1104674, EBI-852851; P37231:PPARG; NbExp=3; IntAct=EBI-1104674, EBI-781384;
CMGA_HUMAN	Chromogranin-A	CHGA	1				0.9		50656.7	457	4.26696	2.13659	0.484179	-48.3408	-0.107221	66	0.14442	498.63	1.09109	381.48	0.834748	475.91	1.04138	0.0875274	0.00656455	0.0393873	0.196937	0.0109409	0.0809628	0.0153173	0.0131291	0.0678337	0.0897155	0.0196937	0.0218818	0.0634573	0.0634573	0.0612691	0.083151	0.0196937	0.0415755	0.00875274	0.00875274	P10645	CHGA	Homo sapiens (Human).	Pancreastatin strongly inhibits glucose induced insulin release from the pancreas.	Interacts with SCG3 (By similarity).	N/A
CNDP1_HUMAN	Beta-Ala-His dipeptidase	CNDP1	1.2	1	1.1	1.1	1.3	1.2	56668.8	507	4.94612	1.75925	0.552032	-19.7498	-0.0414201	63	0.12426	524.41	1.03434	511.33	1.00854	496.5	0.97929	0.0670611	0.00394477	0.0650888	0.0729783	0.0453649	0.0710059	0.0276134	0.0670611	0.0473373	0.102564	0.0315582	0.0276134	0.0571992	0.035503	0.0493097	0.0631164	0.0433925	0.0828402	0.0138067	0.025641	Q96KN2	CNDP1	Homo sapiens (Human).	N/A	Homodimer.	N/A
CNN2_HUMAN	Calponin-2	CNN2	1	1	1.6	1	1.7	1.4	33674.7	309	7.38399	1.64285	0.51466	0.154468	0	35	0.113269	299.82	0.970291	300.21	0.971553	331.36	1.07236	0.0550162	0.0226537	0.0550162	0.0420712	0.0226537	0.110032	0.0161812	0.0355987	0.0679612	0.0809061	0.0453074	0.0517799	0.0582524	0.0711974	0.0291262	0.0776699	0.0647249	0.0420712	0.00647249	0.0453074	Q99439	CNN2	Homo sapiens (Human).	Thin filament-associated protein that is implicated in the regulation and modulation of smooth muscle contraction. It is capable of binding to actin, calmodulin, troponin C and tropomyosin. The interaction of calponin with actin inhibits the actomyosin Mg-ATPase activity.	N/A	N/A
CNPY2_HUMAN	Protein canopy homolog 2	CNPY2							20638.6	182	4.55105	2.00549	0.546868	-13.6852	-0.0769231	27	0.148352	191.64	1.05297	175.27	0.963022	179.9	0.988462	0.0659341	0.032967	0.0824176	0.10989	0.021978	0.0659341	0.032967	0.0604396	0.0494505	0.10989	0.0164835	0.021978	0.021978	0.032967	0.0659341	0.0769231	0.032967	0.0549451	0.021978	0.021978	Q9Y2B0	CNPY2	Homo sapiens (Human).	Positive regulator of neurite outgrowth by stabilizing myosin regulatory light chain (MRLC). It prevents MIR-mediated MRLC ubiquitination and its subsequent proteasomal degradation.	Interacts with MYLIP/MIR.	N/A
CNTN1_HUMAN	Contactin-1	CNTN1	1	1	0.5	0.9	0.7	0.8	113247	1018	5.68993	1.73815	0.537917	-17.8477	-0.018664	122	0.119843	1008.5	0.990668	1019.16	1.00114	1043.88	1.02542	0.0717092	0.0147348	0.0530452	0.0667976	0.0353635	0.0717092	0.018664	0.0707269	0.0540275	0.0667976	0.0176817	0.0550098	0.0667976	0.0225933	0.0471513	0.0726916	0.0579568	0.0726916	0.0196464	0.0442043	Q12860	CNTN1	Homo sapiens (Human).	Contactins mediate cell surface interactions during nervous system development. Involved in the formation of paranodal axo-glial junctions in myelinated peripheral nerves and in the signaling between axons and myelinating glial cells via its association with CNTNAP1. Participates in oligodendrocytes generation by acting as a ligand of NOTCH1. Its association with NOTCH1 promotes NOTCH1 activation…	Monomer. Interacts with CNTNAP1 in cis form. Interacts with NOTCH1 and TNR (By similarity). Binds to the carbonic- anhydrase like domain of PTPRZ1.	N/A
CO1A1_HUMAN	Collagen alpha-1(I) chain	COL1A1	1.1	1.1	0.3	0.1	0.3	0.1	138855	1464	5.47205	1.28065	0.456646	-12.8385	-0.00887978	137	0.0935792	1271.25	0.86834	1198.68	0.81877	1808.31	1.23518	0.0949454	0.0122951	0.045082	0.0512295	0.0184426	0.267077	0.00614754	0.0163934	0.0389344	0.0327869	0.00887978	0.0191257	0.189891	0.0334699	0.0484973	0.0409836	0.0307377	0.0321038	0.00409836	0.00887978	Q9UML6	COL1A1	Homo sapiens (Human).	Type I collagen is a member of group I collagen (fibrillar forming collagen).	Trimers of one alpha 2(I) and two alpha 1(I) chains. Interacts with MRC2 (By similarity). Interacts with TRAM2.	O01949:AAEL010235 (xeno); NbExp=5; IntAct=EBI-982999, EBI-7685554;
CO1A2_HUMAN	Collagen alpha-2(I) chain	COL1A2		1		0.9		1.6	129233	1366	9.35944	1.29253	0.466742	14.0757	0.00951684	137	0.100293	1187.01	0.868968	1152.78	0.843909	1661.72	1.21649	0.0944363	0.00658858	0.0314788	0.0483163	0.0161054	0.278917	0.010981	0.0234261	0.0366032	0.0446559	0.00732064	0.0300146	0.169839	0.0241581	0.0527086	0.0380673	0.0307467	0.0402635	0.00366032	0.011713	Q9UML5	COL1A2	Homo sapiens (Human).	Type I collagen is a member of group I collagen (fibrillar forming collagen).	Trimers of one alpha 2(I) and two alpha 1(I) chains.	N/A
CO2_HUMAN	Complement C2	C2	1	1.1	1.1	1.1	1.2	1.2	83212.4	752	7.43373	1.73831	0.545638	0.722063	0	96	0.12766	741.46	0.985984	747.59	0.994136	772.59	1.02738	0.0571809	0.0319149	0.0505319	0.0518617	0.0425532	0.0824468	0.025266	0.0425532	0.0478723	0.0970745	0.0265957	0.0571809	0.0558511	0.0398936	0.0545213	0.0851064	0.0492021	0.0638298	0.0172872	0.0212766	P06681	C2	Homo sapiens (Human).	Component C2 which is part of the classical pathway of the complement system is cleaved by activated factor C1 into two fragments: C2b and C2a. C2a, a serine protease, then combines with complement factor 4b to generate the C3 or C5 convertase.	C2a interacts with Schistosoma haematobium TOR (via N- terminal extracellular domain). This results in inhibition of the classical and lectin pathway of complement activation, probably due to interference with binding of C2a to C4b such that C3 convertase cannot be formed. This infers resistance to complement- mediated cell lysis, allowing parasite survival and infection.	N/A
CO3_HUMAN	Complement C3	C3	1	0.9	2.2	2.2	1.9	1.9	187027	1663	6.33829	1.88297	0.535556	-16.3816	-0.0108238	224	0.134696	1701.38	1.02308	1683.93	1.01259	1651.79	0.993259	0.0583283	0.0162357	0.0541191	0.0739627	0.0360794	0.0589296	0.0174384	0.0499098	0.0679495	0.0956103	0.0216476	0.0366807	0.0499098	0.0541191	0.0493085	0.0649429	0.0631389	0.0871918	0.0102225	0.0342754	P01024	C3	Homo sapiens (Human).	C3 plays a central role in the activation of the complement system. Its processing by C3 convertase is the central reaction in both classical and alternative complement pathways. After activation C3b can bind covalently, via its reactive thioester, to cell surface carbohydrates or immune aggregates. Derived from proteolytic degradation of complement C3, C3a anaphylatoxin is a mediator of local in…	C3 precursor is first processed by the removal of 4 Arg residues, forming two chains, beta and alpha, linked by a disulfide bond. C3 convertase activates C3 by cleaving the alpha chain, releasing C3a anaphylatoxin and generating C3b (beta chain + alpha' chain). C3dg interacts with CR2 (via the N-terminal Sushi domains 1 and 2). During pregnancy, C3dg exists as a complex (probably a 2:2:2 heterohe…	P08603:CFH; NbExp=2; IntAct=EBI-6863145, EBI-1223708; Q9Y279-1:VSIG4; NbExp=5; IntAct=EBI-905851, EBI-903144; Q9Y279-2:VSIG4; NbExp=2; IntAct=EBI-905851, EBI-903148;
CO4A_HUMAN	Complement C4-A	C4A	0.8	0.8	1	1	0.9	0.8	192661	1744	7.07779	1.7961	0.539845	-4.62596	-0.00401376	223	0.127867	1766.98	1.01318	1740.17	0.997804	1749.63	1.00323	0.078555	0.016055	0.0498853	0.0602064	0.0384174	0.0728211	0.021789	0.0315367	0.0441514	0.114679	0.0172018	0.0303899	0.0567661	0.0538991	0.0619266	0.0831422	0.0510321	0.0762615	0.0114679	0.0298165	Q6U2F8	C4A	Homo sapiens (Human).	Non-enzymatic component of C3 and C5 convertases and thus essential for the propagation of the classical complement pathway. Covalently binds to immunoglobulins and immune complexes and enhances the solubilization of immune aggregates and the clearance of IC through CR1 on erythrocytes. C4A isotype is responsible for effective binding to form amide bonds with immune aggregates or protein antigens…	Circulates in blood as a disulfide-linked trimer of an alpha, beta and gamma chain.	N/A
CO4B_HUMAN	Complement C4-B	C4B	0.9	1	1	0.9	1	1	192627	1744	7.27822	1.80039	0.539817	-1.49182	-0.00229358	225	0.129014	1767.4	1.01342	1740.38	0.997924	1748.66	1.00267	0.0791284	0.0154817	0.0487385	0.0602064	0.0384174	0.0733945	0.0223624	0.0321101	0.0441514	0.114106	0.0172018	0.0298165	0.0561927	0.0538991	0.0625	0.0837156	0.0516055	0.0756881	0.0114679	0.0298165	Q96SA7	C4B_2	Homo sapiens (Human).	Non-enzymatic component of the C3 and C5 convertases and thus essential for the propagation of the classical complement pathway. Covalently binds to immunoglobulins and immune complexes and enhances the solubilization of immune aggregates and the clearance of IC through CR1 on erythrocytes. C4A isotype is responsible for effective binding to form amide bonds with immune aggregates or protein anti…	Circulates in blood as a disulfide-linked trimer of alpha, beta and gamma chains.	N/A
CO5_HUMAN	Complement C5	C5	1	1	1.1	1	1.2	1.1	188182	1676	6.49104	1.74004	0.545746	-15.2097	-0.0101432	208	0.124105	1688.61	1.00752	1729.88	1.03215	1669.54	0.996146	0.0572792	0.0178998	0.0495227	0.0650358	0.0423628	0.0572792	0.0196897	0.0680191	0.0710024	0.0912888	0.0155131	0.0453461	0.0417661	0.0393795	0.0334129	0.0817422	0.0638425	0.0799523	0.0101432	0.0495227	P01031	C5	Homo sapiens (Human).	Activation of C5 by a C5 convertase initiates the spontaneous assembly of the late complement components, C5-C9, into the membrane attack complex. C5b has a transient binding site for C6. The C5b-C6 complex is the foundation upon which the lytic complex is assembled. Derived from proteolytic degradation of complement C5, C5 anaphylatoxin is a mediator of local inflammatory process. It induces the…	C5 precursor is first processed by the removal of 4 basic residues, forming two chains, beta and alpha, linked by a disulfide bond. C5 convertase activates C5 by cleaving the alpha chain, releasing C5a anaphylatoxin and generating C5b (beta chain + alpha' chain). Interacts with tick complement inhibitor.	Q91132:- (xeno); NbExp=2; IntAct=EBI-8558308, EBI-7081824;
CO6A1_HUMAN	Collagen alpha-1(VI) chain	COL6A1	1	0.2	0.4	4.9	0.6		108460	1028	5.05398	1.71566	0.507179	-24.4961	-0.0243191	128	0.124514	990.86	0.963872	959.24	0.933113	1123.95	1.09334	0.0749027	0.0194553	0.0690661	0.0661479	0.0321012	0.151751	0.0136187	0.040856	0.0525292	0.0690661	0.0107004	0.0272374	0.0865759	0.040856	0.0583658	0.0525292	0.0398833	0.0632296	0.00389105	0.0272374	P12109	COL6A1	Homo sapiens (Human).	Collagen VI acts as a cell-binding protein.	Trimers composed of three different chains: alpha-1(VI), alpha-2(VI), and alpha-3(VI) or alpha-5(VI) or alpha-6(VI).	N/A
CO6A3_HUMAN	Collagen alpha-3(VI) chain	COL6A3	1.1	1	0.9	0.8	1	0.9	343451	3177	6.65107	1.76045	0.529273	-15.9069	-0.00598048	392	0.123387	3164.43	0.996043	3161.83	0.995225	3259.99	1.02612	0.0739692	0.00944287	0.0576015	0.0576015	0.0468996	0.095373	0.0141643	0.0481586	0.0497325	0.088763	0.0116462	0.0409191	0.0657853	0.0462701	0.0594901	0.0683034	0.0525653	0.0919106	0.00188857	0.0195153	Q53QF6	COL6A3	Homo sapiens (Human).	Collagen VI acts as a cell-binding protein.	Trimers composed of three different chains: alpha-1(VI), alpha-2(VI), and alpha-3(VI) or alpha-5(VI) or alpha-6(VI).	N/A
CO6_HUMAN	Complement component C6	C6	0.9	0.9	0.8	0.8	0.9	0.8	104716	934	6.7438	1.86998	0.533854	-7.01858	-0.00642398	132	0.141328	914.74	0.979379	908.14	0.972313	979.19	1.04838	0.0438972	0.0685225	0.0481799	0.0792291	0.0417559	0.0706638	0.0203426	0.0417559	0.0706638	0.0728051	0.00856531	0.0535332	0.0460385	0.0492505	0.0503212	0.0888651	0.0567452	0.0460385	0.0139186	0.0289079	P13671	C6	Homo sapiens (Human).	Constituent of the membrane attack complex (MAC) that plays a key role in the innate and adaptive immune response by forming pores in the plasma membrane of target cells.	Component of the membrane attack complex (MAC). MAC assembly is initiated by proteolytic cleavage of C5 into C5a and C5b. C5b binds sequentially C6, C7, C8 and 12-14 copies of the pore-forming subunit C9.	P16333:NCK1; NbExp=2; IntAct=EBI-1753221, EBI-389883;
CO7_HUMAN	Complement component C7	C7	0.9	0.9	0.7	0.8	1.1	1	93455.4	843	6.43907	1.75492	0.538316	-9.85895	-0.0106762	107	0.126928	817.38	0.969609	821.94	0.975018	888.21	1.05363	0.0450771	0.0664294	0.0355872	0.0818505	0.0415184	0.0854093	0.0201661	0.024911	0.0569395	0.0723606	0.0106762	0.0462633	0.0533808	0.0438909	0.0498221	0.10083	0.0486358	0.0652432	0.0166074	0.0344009	P10643	C7	Homo sapiens (Human).	Constituent of the membrane attack complex (MAC) that plays a key role in the innate and adaptive immune response by forming pores in the plasma membrane of target cells. C7 serves as a membrane anchor.	Monomer or dimer; as a C5b-7 complex it can also form multimeric rosettes. MAC assembly is initiated by protelytic cleavage of C5 into C5a and C5b. C5b binds sequentially C6, C7, C8 and multiple copies of the pore-forming subunit C9.	N/A
CO8A_HUMAN	Complement component C8 alpha chain	C8A	1	1	1	1	1	1	65120	584	6.40877	1.8663	0.535873	-5.47376	-0.00856164	76	0.130137	572.45	0.980223	577.8	0.989384	610.95	1.04615	0.0599315	0.0513699	0.0667808	0.0565068	0.0376712	0.0958904	0.015411	0.0479452	0.0547945	0.0667808	0.0205479	0.0393836	0.0308219	0.0565068	0.0599315	0.0804795	0.0530822	0.0462329	0.015411	0.0445205	P07357	C8A	Homo sapiens (Human).	Constituent of the membrane attack complex (MAC) that plays a key role in the innate and adaptive immune response by forming pores in the plasma membrane of target cells. C8A inserts into the target membrane, but does not form pores by itself.	Heterotrimer of 3 chains: alpha, beta and gamma. The alpha and gamma chains are disulfide bonded. Component of the membrane attack complex (MAC). MAC assembly is initiated by protelytic cleavage of C5 into C5a and C5b. C5b binds sequentially C6, C7, C8 and multiple copies of the pore-forming subunit C9.	N/A
CO8B_HUMAN	Complement component C8 beta chain	C8B	0.8	0.9	1.2	0.8	1.3	0.9	67002	591	8.17283	1.97286	0.542014	9.9791	0.0169205	90	0.152284	577.89	0.977817	586.15	0.991794	615.08	1.04074	0.0507614	0.0507614	0.0456853	0.0659898	0.0389171	0.0744501	0.0236887	0.035533	0.0575296	0.072758	0.0186125	0.0490694	0.0456853	0.0406091	0.071066	0.0879865	0.0456853	0.0609137	0.0152284	0.0490694	P07358	C8B	Homo sapiens (Human).	Constituent of the membrane attack complex (MAC) that plays a key role in the innate and adaptive immune response by forming pores in the plasma membrane of target cells.	Heterotrimer of 3 chains: alpha, beta and gamma. The alpha and gamma chains are disulfide bonded. Component of the membrane attack complex (MAC). MAC assembly is initiated by protelytic cleavage of C5 into C5a and C5b. C5b binds sequentially C6, C7, C8 and multiple copies of the pore-forming subunit C9.	N/A
CO8G_HUMAN	Complement component C8 gamma chain	C8G	0.7	0.7	1.2	0.9	1	0.7	22263.2	202	8.47635	1.76411	0.547624	2.33334	0.00990099	25	0.123762	209.59	1.03757	207.89	1.02916	193.4	0.957426	0.118812	0.0148515	0.0445545	0.0445545	0.0544554	0.0742574	0.0247525	0.019802	0.0247525	0.118812	0.00990099	0.0049505	0.049505	0.0841584	0.0742574	0.0544554	0.0594059	0.0841584	0.00990099	0.029703	P07360	C8G	Homo sapiens (Human).	C8 is a constituent of the membrane attack complex. C8 binds to the C5B-7 complex, forming the C5B-8 complex. C5-B8 binds C9 and acts as a catalyst in the polymerization of C9. The gamma subunit seems to be able to bind retinol.	C8 is composed of three chains: alpha, beta and gamma. The alpha and gamma chains are disulfide bonded.	N/A
CO9_HUMAN	Complement component C9	C9	0.9	1.1	1.7	1.8	1.4	1.5	63131.6	559	5.26778	1.97125	0.541199	-13.2679	-0.0232558	79	0.141324	561.06	1.00369	549.02	0.982147	573.64	1.02619	0.0518784	0.0465116	0.0626118	0.0858676	0.0500894	0.0644007	0.0161002	0.059034	0.0661896	0.0751342	0.0178891	0.0483005	0.0339893	0.0250447	0.059034	0.0858676	0.0572451	0.0500894	0.00715564	0.0375671	P02748	C9	Homo sapiens (Human).	Constituent of the membrane attack complex (MAC) that plays a key role in the innate and adaptive immune response by forming pores in the plasma membrane of target cells. C9 is the pore-forming subunit of the MAC.	Component of the membrane attack complex (MAC). MAC assembly is initiated by protelytic cleavage of C5 into C5a and C5b. C5b binds sequentially C6, C7, C8 and multiple copies of the pore-forming subunit C9.	N/A
COBA2_HUMAN	Collagen alpha-2(XI) chain	COL11A2	1	1	0.6	0.4	0.9	0.4	171683	1736	6.08708	1.49354	0.466734	-14.6031	-0.00921659	193	0.111175	1541.34	0.887869	1476.97	0.850789	2078.8	1.19747	0.0564516	0.00806452	0.0455069	0.0633641	0.0178571	0.246544	0.0115207	0.0172811	0.0414747	0.0645161	0.00921659	0.00864055	0.171659	0.0501152	0.0581797	0.0374424	0.0345622	0.0426267	0.00172811	0.0132488	Q5SUI8	COL11A2	Homo sapiens (Human).	May play an important role in fibrillogenesis by controlling lateral growth of collagen II fibrils.	Trimers composed of three different chains: alpha 1(XI), alpha 2(XI), and alpha 3(XI). Alpha 3(XI) is a post-translational modification of alpha 1(II). Alpha 1(V) can also be found instead of alpha 3(XI)=1(II).	Q16832:DDR2; NbExp=2; IntAct=EBI-2515504, EBI-1381484;
COF1_HUMAN	Cofilin-1	CFL1	1	1	1	0.8	1.2	1.3	18490.4	166	8.28815	2.0303	0.523976	1.93156	0.0120482	30	0.180723	175.95	1.05994	160.61	0.96753	167.04	1.00627	0.0783133	0.0240964	0.0722892	0.0903614	0.0301205	0.0542169	0.0060241	0.0542169	0.150602	0.0843373	0.0240964	0.0180723	0.0361446	0.0120482	0.0240964	0.0722892	0.0421687	0.0843373	0.0060241	0.0361446	P23528	CFL1	Homo sapiens (Human).	Binds to F-actin and exhibits pH-sensitive F-actin depolymerizing activity. Regulates actin cytoskeleton dynamics. Important for normal progress through mitosis and normal cytokinesis. Plays a role in the regulation of cell morphology and cytoskeletal organization. Required for the up-regulation of atypical chemokine receptor ACKR2 from endosomal compartment to cell membrane, increasing its effic…	Can bind G- and F-actin in a 1:1 ratio of cofilin to actin. It is a major component of intranuclear and cytoplasmic actin rods.	P54253:ATXN1; NbExp=5; IntAct=EBI-352733, EBI-930964; Q13393:PLD1; NbExp=4; IntAct=EBI-352733, EBI-2827556; O14939:PLD2; NbExp=2; IntAct=EBI-352733, EBI-1053996; Q8WYL5:SSH1; NbExp=2; IntAct=EBI-352733, EBI-1222387; P63104:YWHAZ; NbExp=3; IntAct=EBI-352733, EBI-347088;
COL11_HUMAN	Collectin-11	COLEC11	0.9	0.9	0.7	0.7	0.7	0.6	28646.5	271	5.05518	1.67469	0.516974	-6.9154	-0.0258303	34	0.125461	269.33	0.993838	251.03	0.92631	291.3	1.07491	0.0811808	0.0258303	0.0627306	0.0738007	0.0258303	0.147601	0.0147601	0.0369004	0.0701107	0.0774908	0.0369004	0.0405904	0.0590406	0.0332103	0.0405904	0.0627306	0.0258303	0.0553506	0.00738007	0.0221402	B2R9M5	COLEC11	Homo sapiens (Human).	Lectin that binds to various sugars including fucose and mannose. Has a higher affinity for fucose compared to mannose. Does not bind to glucose, N-acetylglucosamine and N- acetylgalactosamine. Also binds lipopolysaccharides (LPS). Involved in fundamental development serving as a guidance cue for neural crest cell migration (By similarity).	N/A	N/A
COMP_HUMAN	Cartilage oligomeric matrix protein	COMP	1.1	1.1	0.5	0.5	0.6	0.4	82806.6	757	4.15628	1.71889	0.518058	-65.6709	-0.0858653	81	0.107001	727.2	0.960634	721.21	0.952721	827.84	1.09358	0.0620872	0.0607662	0.129458	0.0449141	0.0343461	0.0937913	0.0184941	0.0250991	0.0264201	0.0501982	0.010568	0.0568032	0.0620872	0.0673712	0.0620872	0.0475561	0.0462351	0.0739762	0.01321	0.014531	P49747	COMP	Homo sapiens (Human).	May play a role in the structural integrity of cartilage via its interaction with other extracellular matrix proteins such as the collagens and fibronectin. Can mediate the interaction of chondrocytes with the cartilage extracellular matrix through interaction with cell surface integrin receptors. Could play a role in the pathogenesis of osteoarthritis. Potent suppressor of apoptosis in both prim…	Pentamer; disulfide-linked. Exists in a more compact conformation in the presence of calcium and shows a more extended conformation in the absence of calcium. Interacts with ITGB3, ITGA5 and FN1. Binding to FN1 requires the presence of divalent cations (Ca(2+), Mg(2+) or Mn(2+)). The greatest amount of binding is seen in the presence of Mn(2+). Interacts with MATN1, MATN3, MATN4 and ACAN. Binds h…	P13608:ACAN (xeno); NbExp=2; IntAct=EBI-2531022, EBI-6259246; P58397:ADAMTS12; NbExp=3; IntAct=EBI-2531022, EBI-9028051;
COR1A_HUMAN	Coronin-1A	CORO1A	0.6	0.6	1.8	1.3	3	2.3	50992.8	461	6.66667	1.93948	0.537158	-3.56636	-0.00867679	67	0.145336	464.7	1.00803	453.5	0.983731	466.71	1.01239	0.0672451	0.0260304	0.0607375	0.0715835	0.0303688	0.0802603	0.021692	0.0368764	0.0477223	0.0889371	0.0238612	0.0195228	0.0650759	0.0281996	0.0759219	0.0694143	0.0629067	0.0867679	0.0173536	0.0195228	P31146	CORO1A	Homo sapiens (Human).	May be a crucial component of the cytoskeleton of highly motile cells, functioning both in the invagination of large pieces of plasma membrane, as well as in forming protrusions of the plasma membrane involved in cell locomotion. In mycobacteria- infected cells, its retention on the phagosomal membrane prevents fusion between phagosomes and lysosomes.	Binds actin.	P40763:STAT3; NbExp=2; IntAct=EBI-1046676, EBI-518675;
COTL1_HUMAN	Coactosin-like protein	COTL1	1.5	1.4	2	2.2	2	1.2	15934.9	142	5.31297	2.01127	0.526761	-1.98112	-0.0140845	21	0.147887	149.94	1.05592	142.4	1.00282	140.1	0.98662	0.0985915	0.0140845	0.0774648	0.0774648	0.0633803	0.0704225	0.00704225	0.056338	0.0915493	0.0492958	0.0140845	0.028169	0.00704225	0.0492958	0.0492958	0.0492958	0.0774648	0.0774648	0.0140845	0.028169	Q14019	COTL1	Homo sapiens (Human).	Binds to F-actin in a calcium-independent manner. Has no direct effect on actin depolymerization. Acts as a chaperone for ALOX5 (5LO), influencing both its stability and activity in leukotrienes synthesis.	Interacts with 5-lipoxygenase (ALOX5/5LO) in a calcium- independent manner. Binds to F-actin with a stoichiometry of 1:2.	P09917:ALOX5; NbExp=4; IntAct=EBI-79926, EBI-79934;
CP46A_HUMAN	Cholesterol 24-hydroxylase	CYP46A1		1		1		0.7	56783.7	500	9.38369	2.02484	0.5485	10.4691	0.02	74	0.148	517.54	1.03508	502.86	1.00572	486.41	0.97282	0.064	0.014	0.042	0.07	0.06	0.068	0.016	0.028	0.054	0.126	0.03	0.018	0.066	0.052	0.078	0.054	0.05	0.074	0.012	0.024	Q9Y6A2	CYP46A1	Homo sapiens (Human).	Involved in the turnover of cholesterol. It converts cholesterol into 24S-hydroxycholesterol and, to a lesser extent, 25-hydroxycholesterol. Has also activity with xenobiotic compounds, such as clotrimazole.	N/A	N/A
CPN2_HUMAN	Carboxypeptidase N subunit 2	CPN2	0.8	0.9	0.9	1.1	1.1	1.2	60516.8	545	5.88777	1.45851	0.563119	-10.4455	-0.0201835	44	0.0807339	550.71	1.01048	560.82	1.02903	525.31	0.963872	0.0697248	0.0275229	0.0275229	0.0495413	0.0513761	0.0568807	0.0238532	0.0220183	0.0220183	0.198165	0.00917431	0.066055	0.0587156	0.0678899	0.0348624	0.0715596	0.0642202	0.0422018	0.0183486	0.0183486	P22792	CPN2	Homo sapiens (Human).	The 83 kDa subunit binds and stabilizes the catalytic subunit at 37 degrees Celsius and keeps it in circulation. Under some circumstances it may be an allosteric modifier of the catalytic subunit.	Tetramer of two catalytic chains and two glycosylated inactive chains.	N/A
CQ105_HUMAN	Uncharacterized protein C17orf105	C17orf105							19533.6	164	10.6443	2.51213	0.524085	16.5529	0.097561	39	0.237805	164.21	1.00128	164.71	1.00433	167.29	1.02006	0.0426829	0.0121951	0.0426829	0.054878	0.0182927	0.0243902	0.0426829	0.0670732	0.097561	0.0792683	0.0121951	0.0914634	0.0365854	0.054878	0.097561	0.0609756	0.054878	0.0487805	0.0121951	0.0487805	B2RV13	C17orf105	Homo sapiens (Human).	N/A	N/A	N/A
CR2_HUMAN	Complement receptor type 2	CR2	1		0.6		0.4		112839	1033	7.54168	1.55778	0.540716	3.79016	0.00387222	119	0.115198	974	0.942885	1031.79	0.998829	1089.75	1.05494	0.0484027	0.0590513	0.0309777	0.054211	0.0290416	0.0919652	0.0261375	0.0522749	0.0493708	0.0658277	0.0164569	0.0445305	0.0861568	0.0387222	0.0396902	0.0822846	0.0609874	0.0667957	0.0154889	0.0416263	P20023	CR2	Homo sapiens (Human).	Receptor for complement C3Dd, for the Epstein-Barr virus on human B-cells and T-cells and for HNRPU. Participates in B lymphocytes activation.	Interacts (via Sushi domain 1 and 2) with C3dg.	N/A
CR3L3_HUMAN	Cyclic AMP-responsive element-binding protein 3-like protein 3	CREB3L3		1	100	1.8	100	1.1	49045.7	461	4.76259	1.62321	0.514881	-17.5216	-0.0390456	52	0.112798	459.3	0.996312	429.86	0.932451	486.39	1.05508	0.0824295	0.0195228	0.0672451	0.0650759	0.0173536	0.0845987	0.0195228	0.032538	0.0498915	0.121475	0.010846	0.0281996	0.0845987	0.0477223	0.0433839	0.0997831	0.0585683	0.0477223	0.010846	0.00867679	Q68CJ9	CREB3L3	Homo sapiens (Human).	Transcription factor that may act during endoplasmic reticulum stress by activating unfolded protein response target genes. Activated in response to cAMP stimulation. In vitro, binds to the cAMP response element (CRE) and box-B element. Activates transcription through box-B element. Activates transcription through CRE (By similarity). Seems to function synergistically with ATF6. In acute inflamma…	Binds DNA as a dimer (By similarity). Probably homodimerizes. Probably forms a heterodimer with ATF6. Interacts with ATF6.	P18850:ATF6; NbExp=2; IntAct=EBI-852194, EBI-852157;
CRAC1_HUMAN	Cartilage acidic protein 1	CRTAC1	0.9	0.8	0.8	1.1	1	1.1	71374.7	661	4.72656	1.68794	0.534266	-23.5582	-0.0363086	72	0.108926	648.85	0.981619	645.84	0.977065	695.71	1.05251	0.0937973	0.02118	0.0771558	0.0514372	0.0438729	0.0998487	0.0166415	0.0378215	0.0272315	0.0711044	0.0196672	0.0590015	0.0590015	0.0226929	0.065053	0.0695915	0.0453858	0.0786687	0.0075643	0.0332829	Q9NQ79	CRTAC1	Homo sapiens (Human).	N/A	N/A	N/A
CRP_HUMAN	C-reactive protein	CRP							25022.3	224	5.32402	1.59987	0.555134	-3.84264	-0.0178571	23	0.102679	223.21	0.996473	230.93	1.03094	224.5	1.00223	0.0446429	0.0133929	0.0401786	0.0669643	0.0714286	0.0803571	0.0133929	0.0535714	0.0625	0.0892857	0.0133929	0.03125	0.0491071	0.03125	0.0267857	0.102679	0.0625	0.0848214	0.0267857	0.0357143	P02741	CRP	Homo sapiens (Human).	Displays several functions associated with host defense: it promotes agglutination, bacterial capsular swelling, phagocytosis and complement fixation through its calcium-dependent binding to phosphorylcholine. Can interact with DNA and histones and may scavenge nuclear material released from damaged circulating cells.	Homopentamer. Pentaxin (or pentraxin) have a discoid arrangement of 5 non-covalently bound subunits.	P31995:FCGR2C; NbExp=2; IntAct=EBI-1395983, EBI-1396036;
CSDE1_HUMAN	Cold shock domain-containing protein E1	CSDE1	1		0.9		1.7		88827.1	798	6.16963	1.92477	0.529787	-11.9226	-0.0162907	120	0.150376	808.26	1.01286	789.79	0.989712	816.31	1.02294	0.0538847	0.018797	0.066416	0.0776942	0.0551378	0.0814536	0.0225564	0.056391	0.075188	0.0651629	0.018797	0.0526316	0.0426065	0.0413534	0.0526316	0.0576441	0.0526316	0.0877193	0.00125313	0.0200501	Q68DI9	CSDE1	Homo sapiens (Human).	RNA-binding protein. Required for internal initiation of translation of human rhinovirus RNA. May be involved in translationally coupled mRNA turnover. Implicated with other RNA- binding proteins in the cytoplasmic deadenylation/translational and decay interplay of the FOS mRNA mediated by the major coding- region determinant of instability (mCRD) domain.	Component of a multi subunit autoregulatory ribonucleoprotein complex (ARC), at least composed of IGF2BP1, PABPC1 and CSDE1. Interacts with STRAP. Part of a complex associated with the FOS mCRD domain and consisting of PABPC1, PAIP1, HNRPD and SYNCRIP. The interaction with PABPC1 is direct and RNA-independent.	N/A
CSF1R_HUMAN	Macrophage colony-stimulating factor 1 receptor	CSF1R	1.3	1.3	1.4	1.1	2.3	1.8	107913	972	6.33204	1.60791	0.547222	-15.3152	-0.0174897	109	0.11214	967.77	0.995648	983.71	1.01205	980.68	1.00893	0.0658436	0.0216049	0.0442387	0.0565844	0.0401235	0.0709877	0.0288066	0.0380658	0.0421811	0.106996	0.0185185	0.0462963	0.0617284	0.0514403	0.0411523	0.0823045	0.0514403	0.0771605	0.0174897	0.037037	P07333	CSF1R	Homo sapiens (Human).	Tyrosine-protein kinase that acts as cell-surface receptor for CSF1 and IL34 and plays an essential role in the regulation of survival, proliferation and differentiation of hematopoietic precursor cells, especially mononuclear phagocytes, such as macrophages and monocytes. Promotes the release of proinflammatory chemokines in response to IL34 and CSF1, and thereby plays an important role in innat…	Interacts with INPPL1/SHIP2 and THOC5 (By similarity). Monomer. Homodimer. Interacts with CSF1 and IL34. Interaction with dimeric CSF1 or IL34 leads to receptor homodimerization. Interacts (tyrosine phosphorylated) with PLCG2 (via SH2 domain). Interacts (tyrosine phosphorylated) with PIK3R1 (via SH2 domain). Interacts (tyrosine phosphorylated) with FYN, YES1 and SRC (via SH2 domain). Interacts (t…	N/A
CSPG4_HUMAN	Chondroitin sulfate proteoglycan 4	CSPG4	1		1.1		1.2		250377	2322	5.15095	1.60958	0.535056	-76.1584	-0.0353144	242	0.10422	2350.05	1.01208	2295.26	0.988484	2323.18	1.00051	0.0964686	0.00516796	0.047373	0.0633075	0.038329	0.0865633	0.0288544	0.0232558	0.0124892	0.120586	0.0111972	0.0206718	0.0783807	0.0607235	0.0628768	0.0706288	0.0615848	0.0839793	0.00947459	0.0180879	Q6UVK1	CSPG4	Homo sapiens (Human).	Proteoglycan playing a role in cell proliferation and migration which stimulates endothelial cells motility during microvascular morphogenesis. May also inhibit neurite outgrowth and growth cone collapse during axon regeneration. Cell surface receptor for collagen alpha 2(VI) which may confer cells ability to migrate on that substrate. Binds through its extracellular N- terminus growth factors, e…	Interacts with the first PDZ domain of MPDZ. Interacts with PRKCA. Binds TNC, laminin-1, COL5A1 and COL6A2. Interacts with PLG and angiostatin. Binds FGF2 and PDGFA. Interacts with GRIP1, GRIP2 and GRIA2. Forms a ternary complex with GRIP1 and GRIA2 (By similarity). Interacts with LGALS3 and the integrin composed of ITGB1 and ITGA3. Interacts with ITGA4 through its chondroitin sulfate glycosamino…	N/A
CSRP1_HUMAN	Cysteine and glycine-rich protein 1	CSRP1	1		0.8		1.6		20553.2	193	8.67585	1.64886	0.522953	9.88288	0.0518135	33	0.170984	185.69	0.962124	183.57	0.95114	209.1	1.08342	0.0829016	0.0777202	0.0207254	0.0673575	0.0414508	0.15544	0.0310881	0.0259067	0.119171	0.0362694	0.0103627	0.0310881	0.0362694	0.0310881	0.0207254	0.0621762	0.0466321	0.0466321	0.0103627	0.0466321	P21291	CSRP1	Homo sapiens (Human).	Could play a role in neuronal development.	Monomer (By similarity).	N/A
CSTN1_HUMAN	Calsyntenin-1	CLSTN1	1	1	0.6		1.1	0.6	109721	981	4.54737	1.75545	0.533761	-72.437	-0.0764526	126	0.12844	1004.54	1.024	956.47	0.974995	991.38	1.01058	0.058104	0.0224261	0.0621814	0.104995	0.0366972	0.0642202	0.0377166	0.0458716	0.049949	0.0784913	0.0163099	0.0356779	0.0519878	0.0377166	0.0407747	0.0703364	0.0642202	0.0825688	0.0122324	0.0275229	O94985	CLSTN1	Homo sapiens (Human).	Induces KLC1 association with vesicles and functions as a cargo in axonal anterograde transport. Complex formation with APBA2 and APP, stabilizes APP metabolism and enhances APBA2- mediated suppression of beta-APP40 secretion, due to the retardation of intracellular APP maturation. In complex with APBA2 and C99, a C-terminal APP fragment, abolishes C99 interaction with PSEN1 and thus APP C99 clea…	Directly interacts with APBA2. Forms a tripartite complex with APBA2 and APP. The CTF1 chain interacts with PSEN1. The intracellular fragment AlcICD interacts with APBB1; this interaction stabilizes AlcICD metabolism. Interacts with KLC1 and APBB1 (By similarity).	Q8CD76:Klc1 (xeno); NbExp=7; IntAct=EBI-522075, EBI-6271950;
CUTA_HUMAN	Protein CutA	CUTA	1	1	1.5	0.6	0.7	0.5	19103.9	179	5.18954	1.44385	0.555978	-1.98397	-0.0111732	14	0.0782123	182.74	1.02089	184.59	1.03123	173.16	0.967374	0.0949721	0.0111732	0.0223464	0.0614525	0.0223464	0.0558659	0.00558659	0.0446927	0.0335196	0.117318	0.027933	0.0167598	0.0893855	0.0335196	0.0391061	0.111732	0.0446927	0.128492	0.0167598	0.0223464	O60888	CUTA	Homo sapiens (Human).	May form part of a complex of membrane proteins attached to acetylcholinesterase (AChE).	Homotrimer.	P22736:NR4A1; NbExp=2; IntAct=EBI-1051556, EBI-721550;
CXCL7_HUMAN	Platelet basic protein	PPBP	1.1	1.1	0.8	0.8	0.8	1.1	13885.1	128	9.06883	1.9207	0.53125	5.0586	0.0390625	22	0.171875	131.54	1.02766	125.49	0.980391	127.4	0.995313	0.078125	0.0390625	0.0625	0.046875	0	0.0546875	0.0234375	0.0625	0.101562	0.15625	0.015625	0.03125	0.0390625	0.0390625	0.046875	0.0859375	0.0703125	0.0390625	0	0.0078125	P02775	PPBP	Homo sapiens (Human).	LA-PF4 stimulates DNA synthesis, mitosis, glycolysis, intracellular cAMP accumulation, prostaglandin E2 secretion, and synthesis of hyaluronic acid and sulfated glycosaminoglycan. It also stimulates the formation and secretion of plasminogen activator by human synovial cells. NAP-2 is a ligand for CXCR1 and CXCR2, and NAP-2, NAP-2(73), NAP-2(74), NAP-2(1-66), and most potent NAP-2(1-63) are chemo…	Beta-thromboglobulin is a homotetramer.	N/A
CYTB_HUMAN	Cystatin-B	CSTB		1		1.2			11132.2	98	7.72653	1.73694	0.527959	0.417318	0	16	0.163265	102.02	1.04102	97.9	0.99898	97.52	0.995102	0.0816327	0.0102041	0.0408163	0.0714286	0.0714286	0.0306122	0.0510204	0.0204082	0.0918367	0.0612245	0.0204082	0.0510204	0.0510204	0.0714286	0.0204082	0.0612245	0.0714286	0.0918367	0	0.0306122	P04080	CSTB	Homo sapiens (Human).	This is an intracellular thiol proteinase inhibitor. Tightly binding reversible inhibitor of cathepsins L, H and B.	Able to form dimers stabilized by noncovalent forces.	N/A
CYTC_HUMAN	Cystatin-C	CST3	1	1	0.8	0.7	1	1.1	15788.8	146	8.95081	1.69151	0.539658	4.09968	0.0273973	19	0.130137	148.15	1.01473	145.32	0.995342	146.18	1.00123	0.123288	0.0273973	0.0479452	0.0342466	0.0342466	0.0684932	0.0205479	0.0205479	0.0479452	0.10274	0.0273973	0.0342466	0.0753425	0.0479452	0.0616438	0.0616438	0.0479452	0.0821918	0.00684932	0.0273973	P01034	CST3	Homo sapiens (Human).	As an inhibitor of cysteine proteinases, this protein is thought to serve an important physiological role as a local regulator of this enzyme activity.	Homodimer.	N/A
DAG1_HUMAN	Dystroglycan	DAG1	1		0.6		1.2		97378.5	895	8.84768	1.75865	0.516782	7.90852	0.00670391	122	0.136313	877.94	0.980939	870.97	0.973151	929.94	1.03904	0.0715084	0.00670391	0.0502793	0.0536313	0.0234637	0.0558659	0.0256983	0.052514	0.052514	0.073743	0.0212291	0.0268156	0.121788	0.0301676	0.0581006	0.0759777	0.0916201	0.0815642	0.0100559	0.0167598	Q14118	DAG1	Homo sapiens (Human).	The dystroglycan complex is involved in a number of processes including laminin and basement membrane assembly, sarcolemmal stability, cell survival, peripheral nerve myelination, nodal structure, cell migration, and epithelial polarization. Alpha-dystroglycan is an extracellular peripheral glycoprotein that acts as a receptor for both extracellular matrix proteins containing laminin-G domains, a…	Monomer. Heterodimer of alpha- and beta-dystroglycan subunits which are the central components of the dystrophin- glycoprotein complex. This complex then can form a dystrophin- associated glycoprotein complex (DGC) which is composed of three subcomplexes: a cytoplasmic complex comprised of DMD (or UTRN), DTNA and a number of syntrophins, such as SNTB1, SNTB2, SNTG1 and SNTG2, the transmembrane dy…	Q3T1J5:Ank3 (xeno); NbExp=2; IntAct=EBI-1755945, EBI-2133962; P16333:NCK1; NbExp=2; IntAct=EBI-1755945, EBI-389883;
DBNL_HUMAN	Drebrin-like protein	DBNL		1		0.5	42.6	1.3	48176.7	430	4.71689	2.01928	0.508186	-21.3133	-0.0511628	59	0.137209	449.65	1.0457	398.24	0.92614	440.29	1.02393	0.0953488	0.0116279	0.0348837	0.132558	0.0325581	0.0767442	0.0209302	0.0348837	0.044186	0.0511628	0.0162791	0.0372093	0.0627907	0.0697674	0.072093	0.0627907	0.0395349	0.0627907	0.0139535	0.027907	Q9HBN8	DBNL	Homo sapiens (Human).	Adapter protein that binds F-actin and DNM1, and thereby plays a role in receptor-mediated endocytosis. Plays a role in the reorganization of the actin cytoskeleton, formation of cell projections, such as neurites, in neuron morphogenesis and synapse formation via its interaction with WASL and COBL. Does not bind G- actin and promote actin polymerization by itself. Required for the formation of o…	Interacts with SHANK2, SHANK3 and SYN1. Interacts with FGD1 and DNM1. Interacts with ANKRD54. Interacts with COBL. Interacts with WASL and WIPF1 (By similarity). Interacts with MAP4K1 and PRAM1.	Q9H788:SH2D4A; NbExp=3; IntAct=EBI-751783, EBI-747035; P78314:SH3BP2; NbExp=7; IntAct=EBI-751783, EBI-727062;
DEF3_HUMAN	Neutrophil defensin 3	DEFA3		1	70.5	2.6		2.7	10238.1	94	5.79111	1.69553	0.564681	-1.16932	-0.0106383	10	0.106383	100.94	1.07383	94.67	1.00713	86.59	0.92117	0.191489	0.0638298	0.0425532	0.0638298	0.0106383	0.0425532	0.0106383	0.0744681	0.0212766	0.0957447	0.0212766	0.0106383	0.0638298	0.0531915	0.0744681	0.0319149	0.0212766	0.0531915	0.0212766	0.0319149	P59666	DEFA3	Homo sapiens (Human).	Defensin 2 and defensin 3 have antibiotic, fungicide and antiviral activities. Has antimicrobial activity against Gram- negative and Gram-positive bacteria. Defensins are thought to kill microbes by permeabilizing their plasma membrane.	Dimer.	N/A
DEN4B_HUMAN	DENN domain-containing protein 4B	DENND4B	1		0.8		1.1		163739	1496	7.22053	1.71223	0.539733	-2.13601	-0.0026738	179	0.119652	1492.25	0.997493	1450.94	0.96988	1518.74	1.0152	0.0835561	0.0233957	0.0307487	0.0675134	0.0300802	0.072861	0.0240642	0.0220588	0.0254011	0.13369	0.013369	0.0153743	0.106952	0.0487968	0.0701872	0.0868984	0.0394385	0.0635027	0.013369	0.0287433	O75064	DENND4B	Homo sapiens (Human).	Guanine nucleotide exchange factor (GEF) which may activate RAB10. Promotes the exchange of GDP to GTP, converting inactive GDP-bound Rab proteins into their active GTP-bound form.	N/A	N/A
DEN5B_HUMAN	DENN domain-containing protein 5B	DENND5B							144923	1274	6.71065	1.88279	0.547732	-10.2886	-0.00941915	174	0.136578	1307.86	1.02658	1283.79	1.00768	1252.51	0.983132	0.0525903	0.0235479	0.0502355	0.0706436	0.043956	0.0510204	0.0251177	0.0572998	0.0596546	0.119309	0.0274725	0.0416013	0.0494505	0.0572998	0.0518053	0.0714286	0.0541601	0.0541601	0.0102041	0.0290424	Q6ZUT9	DENND5B	Homo sapiens (Human).	Guanine nucleotide exchange factor (GEF) which may activate RAB39A and/or RAB39B. Promotes the exchange of GDP to GTP, converting inactive GDP-bound Rab proteins into their active GTP-bound form.	N/A	N/A
DHX9_HUMAN	ATP-dependent RNA helicase A	DHX9	1	1	0.6	1.1	0.7	0.9	140866	1270	6.82933	1.82692	0.536764	-6.53282	-0.00629921	165	0.129921	1270.56	1.00044	1263.37	0.99478	1293.07	1.01817	0.0677165	0.0181102	0.0440945	0.0716535	0.0401575	0.0937008	0.0204724	0.0606299	0.0511811	0.0826772	0.0244094	0.0496063	0.0566929	0.0433071	0.0582677	0.0582677	0.0480315	0.0645669	0.00866142	0.0377953	Q08211	DHX9	Homo sapiens (Human).	Unwinds double-stranded DNA and RNA in a 3' to 5' direction. Alteration of secondary structure may subsequently influence interactions with proteins or other nucleic acids. Functions as a transcriptional activator. Component of the CRD- mediated complex that promotes MYC mRNA stability. Involved with LARP6 in the stabilization of type I collagen mRNAs for CO1A1 and CO1A2. Positively regulates HIV…	Interacts with ZIC2, IGF2BP1, IGF2BP2, IGF2BP3, MBD2, HRMT1L2/PRMT1, RELA and LARP6. Can also interact with XRCC5 and with TOP2A in an RNA dependent manner; these interactions may be indirect. Interaction with TOP2A is promoted by UBC9. Interacts with histone H2AFX and this requires phosphorylation of H2AFX on 'Ser-139'. Interacts (via N-terminus) with EIF2AK2/PKR and this interaction is dependen…	P19525:EIF2AK2; NbExp=2; IntAct=EBI-352022, EBI-640775; Q9UBU9:NXF1; NbExp=8; IntAct=EBI-352022, EBI-398874; Q99873:PRMT1; NbExp=2; IntAct=EBI-352022, EBI-78738; Q04206:RELA; NbExp=4; IntAct=EBI-352022, EBI-73886; P67809:YBX1; NbExp=10; IntAct=EBI-352022, EBI-354065; Q9HA38:ZMAT3; NbExp=3; IntAct=EBI-352022, EBI-2548480;
DJC21_HUMAN	DnaJ homolog subfamily C member 21	DNAJC21							61988	531	5.12982	2.36379	0.494463	-18.2433	-0.0357815	106	0.199623	571.81	1.07685	472.45	0.889736	555.02	1.04524	0.0753296	0.0150659	0.0828625	0.131827	0.0320151	0.0301318	0.0207156	0.0150659	0.124294	0.0659134	0.0244821	0.047081	0.039548	0.0527307	0.0546139	0.0640301	0.0320151	0.0451977	0.0112994	0.0357815	Q5F1R6	DNAJC21	Homo sapiens (Human).	May act as a co-chaperone for HSP70.	N/A	P42858:HTT; NbExp=6; IntAct=EBI-2654581, EBI-466029; Q99551:MTERF; NbExp=2; IntAct=EBI-2654581, EBI-2690033;
DMP4_HUMAN	Extracellular serine/threonine protein kinase FAM20C	FAM20C		1		0.9		1	66190.7	584	7.79689	2.03962	0.542688	2.57639	0.00171233	99	0.169521	597.25	1.02269	559.01	0.957209	590.93	1.01187	0.0907534	0.0188356	0.0633562	0.0667808	0.0410959	0.0547945	0.0376712	0.0342466	0.0428082	0.107877	0.0239726	0.0308219	0.0787671	0.0273973	0.0890411	0.0667808	0.0325342	0.0479452	0.0136986	0.0308219	Q8IXL6	FAM20C	Homo sapiens (Human).	Calcium-binding kinase that phosphorylates the caseins and several secreted proteins implicated in biomineralization, including the secretory calcium binding phosphoproteins (SCPP). Preferencially phosphorylates its targets within the S-x-E/pS motif.	N/A	N/A
DOPO_HUMAN	Dopamine beta-hydroxylase	DBH	1	1	0.8	0.8	1	0.9	69018.8	617	6.38816	1.64715	0.550194	-10.7092	-0.0194489	73	0.118314	616.72	0.999546	623.99	1.01133	616.56	0.999287	0.0664506	0.0243112	0.0405186	0.0632091	0.0405186	0.0696921	0.0340357	0.0486224	0.0372771	0.102107	0.0226904	0.0340357	0.0745543	0.0502431	0.0470016	0.0664506	0.0518639	0.0696921	0.0145867	0.0421394	P09172	DBH	Homo sapiens (Human).	Conversion of dopamine to noradrenaline.	Homotetramer composed of two non-covalently bound disulfide-linked dimers.	N/A
DPB1_HUMAN	HLA class II histocompatibility antigen, DP beta 1 chain	HLA-DPB1	1		0.9				29140.2	258	8.71011	1.95318	0.546899	4.34433	0.0155039	35	0.135659	261.07	1.0119	266.83	1.03422	252.93	0.980349	0.0620155	0.0193798	0.0348837	0.0620155	0.0426357	0.0775194	0.0232558	0.0310078	0.0310078	0.0891473	0.0310078	0.0387597	0.0426357	0.0658915	0.0813953	0.0581395	0.0658915	0.0968992	0.0155039	0.0310078	Q9GIX6	HLA-DPB1	Homo sapiens (Human).	Binds peptides derived from antigens that access the endocytic route of antigen presenting cells (APC) and presents them on the cell surface for recognition by the CD4 T-cells. The peptide binding cleft accommodates peptides of 10-30 residues. The peptides presented by MHC class II molecules are generated mostly by degradation of proteins that access the endocytic route, where they are processed …	Heterodimer of an alpha and a beta subunit; also referred as MHC class II molecule. In the endoplasmic reticulum (ER) it forms a heterononamer; 3 MHC class II molecules bind to a CD74 homotrimer (also known as invariant chain or HLA class II histocompatibility antigen gamma chain). In the endosomal/lysosomal system; CD74 undergoes sequential degradation by various proteases; leaving a small fragm…	N/A
DPEP2_HUMAN	Dipeptidase 2	DPEP2		1		0.4		1	53271.1	486	6.37473	1.64562	0.548786	-6.22443	-0.0144033	53	0.109053	488.4	1.00494	492.08	1.01251	483.46	0.994774	0.0679012	0.0164609	0.0493827	0.0493827	0.0288066	0.0740741	0.0246914	0.0329218	0.0308642	0.13786	0.0226337	0.0329218	0.0576132	0.0534979	0.0534979	0.0925926	0.0576132	0.0781893	0.0164609	0.0226337	Q9H4A9	DPEP2	Homo sapiens (Human).	Probable metalloprotease which hydrolyzes leukotriene D4 (LTD4) into leukotriene E4 (LTE4) (By similarity).	Homodimer; disulfide-linked (By similarity).	N/A
DPP4_HUMAN	Dipeptidyl peptidase 4	DPP4		0.9		0.9		0.8	88220.6	766	5.92431	1.74087	0.551984	-14.7753	-0.0208877	89	0.116188	756.76	0.987937	797.37	1.04095	773.87	1.01027	0.0522193	0.0156658	0.0600522	0.0522193	0.04047	0.0561358	0.0248042	0.0639687	0.0522193	0.0809399	0.0195822	0.0522193	0.037859	0.0391645	0.0391645	0.0835509	0.0652742	0.0639687	0.0274151	0.073107	P27487	DPP4	Homo sapiens (Human).	Cell surface glycoprotein receptor involved in the costimulatory signal essential for T-cell receptor (TCR)-mediated T-cell activation. Acts as a positive regulator of T-cell coactivation, by binding at least ADA, CAV1, IGF2R, and PTPRC. Its binding to CAV1 and CARD11 induces T-cell proliferation and NF- kappa-B activation in a T-cell receptor/CD3-dependent manner. Its interaction with ADA also r…	Monomer. Homodimer or heterodimer with Seprase (FAP). Requires homodimerization for optimal dipeptidyl peptidase activity and T-cell costimulation. Found in a membrane raft complex, at least composed of BCL10, CARD11, DPP4 and IKBKB. Associates with collagen. Interacts with PTPRC; the interaction is enhanced in a interleukin-12-dependent manner in activated lymphocytes. Interacts (extracellular d…	Self; NbExp=12; IntAct=EBI-2871277, EBI-2871277; P56658:ADA (xeno); NbExp=5; IntAct=EBI-2871277, EBI-7475530; P51671:CCL11; NbExp=2; IntAct=EBI-2871277, EBI-727357; P02778:CXCL10; NbExp=2; IntAct=EBI-2871277, EBI-7815386; O14625:CXCL11; NbExp=2; IntAct=EBI-2871277, EBI-2871971; P19875:CXCL2; NbExp=2; IntAct=EBI-2871277, EBI-2114901; Q07325:CXCL9; NbExp=2; IntAct=EBI-2871277, EBI-3911467; P01275:G…
DSG2_HUMAN	Desmoglein-2	DSG2	1	1	1	1	1.3	1.1	122215	1118	4.89426	1.69386	0.527764	-40.2023	-0.0375671	128	0.11449	1129.77	1.01053	1109.22	0.992147	1133.04	1.01345	0.0697674	0.0125224	0.0483005	0.0813953	0.0313059	0.0661896	0.0223614	0.0563506	0.0536673	0.0813953	0.019678	0.0500894	0.0545617	0.0384615	0.0384615	0.0822898	0.0796064	0.0822898	0.00536673	0.0259392	Q14126	DSG2	Homo sapiens (Human).	Component of intercellular desmosome junctions. Involved in the interaction of plaque proteins and intermediate filaments mediating cell-cell adhesion.	N/A	N/A
DUT_HUMAN	Deoxyuridine 5'-triphosphate nucleotidohydrolase, mitochondrial	DUT	1						26546.2	252	9.73897	1.81762	0.521548	9.15802	0.0357143	36	0.142857	249.97	0.991944	238.56	0.946667	263.85	1.04702	0.130952	0.0198413	0.0357143	0.0555556	0.031746	0.126984	0.015873	0.0436508	0.0436508	0.0714286	0.015873	0.015873	0.0833333	0.031746	0.0833333	0.0674603	0.0396825	0.0515873	0.00396825	0.031746	Q96Q81	DUT	Homo sapiens (Human).	This enzyme is involved in nucleotide metabolism: it produces dUMP, the immediate precursor of thymidine nucleotides and it decreases the intracellular concentration of dUTP so that uracil cannot be incorporated into DNA.	Homotrimer.	Q6ZVK8:NUDT18; NbExp=3; IntAct=EBI-353224, EBI-740486;
ECM1_HUMAN	Extracellular matrix protein 1	ECM1	1.1	1	0.9	0.8	1	0.8	60633.4	540	6.69766	1.80594	0.526444	-8.00023	-0.0166667	77	0.142593	527.25	0.976389	509.48	0.943481	566.62	1.0493	0.0648148	0.0518519	0.0388889	0.0759259	0.0314815	0.062963	0.0444444	0.0277778	0.0277778	0.0888889	0.00925926	0.0462963	0.105556	0.0703704	0.0703704	0.0611111	0.0518519	0.0333333	0.0148148	0.0222222	Q8IZ60	ECM1	Homo sapiens (Human).	Involved in endochondral bone formation as negative regulator of bone mineralization. Stimulates the proliferation of endothelial cells and promotes angiogenesis. Inhibits MMP9 proteolytic activity.	Interacts (via C-terminus) with HSPG2 (via C-terminus). Interacts with EFEMP1/FBLN3 and LAMB3. Interacts with MMP9.	N/A
EGLN_HUMAN	Endoglin	ENG	1	1	0.8	0.6	0.8	0.7	70531.4	658	6.58907	1.45822	0.549331	-7.11085	-0.0121581	64	0.0972644	655.81	0.996672	661.6	1.00547	655.91	0.996824	0.0759878	0.0273556	0.0303951	0.0516717	0.0334347	0.0668693	0.0273556	0.0410334	0.0319149	0.130699	0.0182371	0.0258359	0.0744681	0.0471125	0.0379939	0.113982	0.0699088	0.0714286	0.0106383	0.0136778	P17813	ENG	Homo sapiens (Human).	Major glycoprotein of vascular endothelium. Involved in the regulation of angiogenesis. May play a critical role in the binding of endothelial cells to integrins and/or other RGD receptors. Acts as TGF-beta coreceptor and is involved in the TGF- beta/BMP signaling cascade. Required for GDF2/BMP9 signaling through SMAD1 in endothelial cells and modulates TGF-beta1 signaling through SMAD3.	Homodimer that forms a heteromeric complex with the signaling receptors for transforming growth factor-beta: TGFBR1 and/or TGFBR2. It is able to bind TGF-beta 1, and 3 efficiently and TGF-beta 2 less efficiently. Interacts with TCTEX1D4. Interacts with ARRB2. Interacts with GDF2.	P08648:ITGA5; NbExp=4; IntAct=EBI-2834630, EBI-1382311; P05556:ITGB1; NbExp=3; IntAct=EBI-2834630, EBI-703066; P01137:TGFB1; NbExp=2; IntAct=EBI-2834630, EBI-779636;
ENDD1_HUMAN	Endonuclease domain-containing 1 protein	ENDOD1		1				1.2	54980.6	500	5.37572	1.6592	0.5574	-5.26571	-0.01	50	0.1	509.3	1.0186	517.83	1.03566	486.67	0.97334	0.08	0.026	0.046	0.058	0.05	0.074	0.006	0.056	0.048	0.112	0.02	0.028	0.048	0.042	0.046	0.076	0.054	0.084	0.014	0.032	O94919	ENDOD1	Homo sapiens (Human).	May act as a DNase and a RNase (Potential).	N/A	N/A
ENOA_HUMAN	Alpha-enolase	ENO1	0.9	0.9	1.3	2.2	1.3	3.1	47138.5	434	7.46046	1.787	0.53235	0.322569	0	61	0.140553	446.87	1.02965	427.72	0.98553	438.52	1.01041	0.0990783	0.0138249	0.0599078	0.0668203	0.0391705	0.0875576	0.0138249	0.062212	0.0875576	0.0829493	0.0207373	0.0552995	0.0368664	0.0253456	0.0391705	0.0599078	0.0414747	0.0760369	0.00691244	0.0253456	Q6GMP2	ENO1	Homo sapiens (Human).	Multifunctional enzyme that, as well as its role in glycolysis, plays a part in various processes such as growth control, hypoxia tolerance and allergic responses. May also function in the intravascular and pericellular fibrinolytic system due to its ability to serve as a receptor and activator of plasminogen on the cell surface of several cell-types such as leukocytes and neurons. Stimulates imm…	Mammalian enolase is composed of 3 isozyme subunits, alpha, beta and gamma, which can form homodimers or heterodimers which are cell-type and development-specific. ENO1 interacts with PLG in the neuronal plasma membrane and promotes its activation. The C-terminal lysine is required for this binding (By similarity).	P22303:ACHE; NbExp=2; IntAct=EBI-353877, EBI-1637793; P12004:PCNA; NbExp=3; IntAct=EBI-353877, EBI-358311; Q8WZ42:TTN; NbExp=3; IntAct=EBI-353877, EBI-681210; P63104:YWHAZ; NbExp=2; IntAct=EBI-353877, EBI-347088;
ENOG_HUMAN	Gamma-enolase	ENO2							47238.2	434	4.6501	1.75401	0.536152	-17.6639	-0.0414747	52	0.119816	449.51	1.03574	427.73	0.985553	434.27	1.00062	0.101382	0.0138249	0.0691244	0.078341	0.0322581	0.0898618	0.0138249	0.062212	0.0599078	0.09447	0.0184332	0.0460829	0.0345622	0.0299539	0.0460829	0.0552995	0.0414747	0.0737327	0.00921659	0.0299539	P09104	ENO2	Homo sapiens (Human).	Has neurotrophic and neuroprotective properties on a broad spectrum of central nervous system (CNS) neurons. Binds, in a calcium-dependent manner, to cultured neocortical neurons and promotes cell survival (By similarity).	Mammalian enolase is composed of 3 isozyme subunits, alpha, beta and gamma, which can form homodimers or heterodimers which are cell-type and development-specific.	N/A
ENPL_HUMAN	Endoplasmin	HSP90B1	1	1	1	0.9	1.3	0.9	92409.8	803	4.47664	2.17589	0.517783	-54.1299	-0.0684932	126	0.156912	861.08	1.07233	761.4	0.948194	804.28	1.00159	0.0547945	0.00622665	0.0809465	0.132005	0.0386052	0.0423412	0.0124533	0.0510585	0.0971357	0.0859278	0.0236613	0.0348692	0.0286426	0.0286426	0.0473225	0.0660025	0.0635118	0.0647572	0.011208	0.0298879	P14625	HSP90B1	Homo sapiens (Human).	Molecular chaperone that functions in the processing and transport of secreted proteins. When associated with CNPY3, required for proper folding of Toll-like receptors (By similarity). Functions in endoplasmic reticulum associated degradation (ERAD). Has ATPase activity.	Homodimer; disulfide-linked. Component of an EIF2 complex at least composed of CELF1/CUGBP1, CALR, CALR3, EIF2S1, EIF2S2, HSP90B1 and HSPA5 (By similarity). Part of a large chaperone multiprotein complex comprising DNAJB11, HSP90B1, HSPA5, HYOU, PDIA2, PDIA4, PDIA6, PPIB, SDF2L1, UGT1A1 and very small amounts of ERP29, but not, or at very low levels, CALR nor CANX. Interacts with AIMP1; regulates…	N/A
ENPP2_HUMAN	Ectonucleotide pyrophosphatase/phosphodiesterase family member 2	ENPP2	1.1	1	0.6	0.9	0.8	1.4	98926.8	863	7.39337	1.89837	0.545782	0.412744	-0.00115875	135	0.156431	843.58	0.977497	860.56	0.997173	893.88	1.03578	0.03708	0.0382387	0.0614137	0.0602549	0.0498262	0.0590962	0.0359212	0.0428737	0.0637312	0.0799537	0.0208575	0.0440324	0.0660487	0.0243337	0.0567787	0.0730012	0.0614137	0.0614137	0.0150637	0.0486674	Q9UCR1	ENPP2	Homo sapiens (Human).	Hydrolyzes lysophospholipids to produce lysophosphatidic acid (LPA) in extracellular fluids. Major substrate is lysophosphatidylcholine. Also can act on sphingosylphosphphorylcholine producing sphingosine-1-phosphate, a modulator of cell motility. Can hydrolyze, in vitro, bis-pNPP, to some extent pNP-TMP, and barely ATP. Involved in several motility- related processes such as angiogenesis and neu…	N/A	N/A
EP15R_HUMAN	Epidermal growth factor receptor substrate 15-like 1	EPS15L1							94195.4	864	4.70429	1.69128	0.505822	-31.7972	-0.0381944	105	0.121528	865.31	1.00152	793.72	0.918657	933.29	1.0802	0.0659722	0.00231481	0.0868056	0.0578704	0.0555556	0.0648148	0.0150463	0.0277778	0.0752315	0.09375	0.0162037	0.0231481	0.0925926	0.0659722	0.03125	0.12037	0.0439815	0.0439815	0.00578704	0.0115741	Q9UBC2	EPS15L1	Homo sapiens (Human).	Seems to be a constitutive component of clathrin-coated pits that is required for receptor-mediated endocytosis. Involved in endocytosis of integrin beta-1 (ITGB1) and transferrin receptor (TFR); internalization of ITGB1 as DAB2-dependent cargo but not TFR seems to require association with DAB2.	Interacts with EPS15, AGFG1/HRB and AGFG2/HRBL. Associates with the clathrin-associated adapter protein complex 2 (AP-2) (By similarity). Interacts with FCHO1. Interacts with FCHO2. Interacts (via EH domains) with DAB2.	Q969G5:PRKCDBP; NbExp=2; IntAct=EBI-2556746, EBI-3893101;
EPCR_HUMAN	Endothelial protein C receptor	PROCR		1		1		1.5	26653.9	238	7.20246	1.65576	0.565042	-0.525883	-0.00420168	25	0.105042	237.17	0.996513	253.08	1.06336	228.69	0.960882	0.0546218	0.0252101	0.0252101	0.0504202	0.0546218	0.0798319	0.0336134	0.0378151	0.00840336	0.134454	0.00840336	0.0252101	0.0378151	0.0756303	0.0630252	0.0798319	0.0798319	0.0756303	0.0168067	0.0336134	Q9UNN8	PROCR	Homo sapiens (Human).	Binds activated protein C. Enhances protein C activation by the thrombin-thrombomodulin complex; plays a role in the protein C pathway controlling blood coagulation.	N/A	P25116:F2R; NbExp=3; IntAct=EBI-719705, EBI-2803960;
EPHA4_HUMAN	Ephrin type-A receptor 4	EPHA4		1		1.4		1.4	109788	986	6.56331	1.84087	0.54073	-6.0246	-0.00608519	123	0.124746	983.45	0.997414	1000.6	1.01481	999.56	1.01375	0.0699797	0.0294118	0.0567951	0.0608519	0.0314402	0.0669371	0.0131846	0.0598377	0.0527383	0.0649087	0.025355	0.0507099	0.0476673	0.0344828	0.0588235	0.0750507	0.0618661	0.0851927	0.015213	0.0395538	P54764	EPHA4	Homo sapiens (Human).	Receptor tyrosine kinase which binds membrane-bound ephrin family ligands residing on adjacent cells, leading to contact-dependent bidirectional signaling into neighboring cells. The signaling pathway downstream of the receptor is referred to as forward signaling while the signaling pathway downstream of the ephrin ligand is referred to as reverse signaling. Highly promiscuous, it has the unique …	Heterotetramer upon binding of the ligand. The heterotetramer is composed of an ephrin dimer and a receptor dimer. Oligomerization is probably required to induce biological responses. Interacts (phosphorylated at position Tyr-602) with FYN. Interacts with CDK5, CDK5R1 and NGEF; upon activation by EFNA1 induces NGEF phosphorylation by the kinase CDK5. Interacts with CHN1; effector of EPHA4 in axon…	N/A
EPHA7_HUMAN	Ephrin type-A receptor 7	EPHA7							112023	998	5.54652	1.82268	0.543507	-17.7798	-0.0180361	120	0.12024	1006.27	1.00829	1011.28	1.01331	998.85	1.00085	0.0671343	0.0300601	0.0470942	0.0751503	0.0370741	0.0721443	0.0160321	0.0611222	0.0501002	0.0691383	0.0270541	0.0400802	0.0470942	0.0440882	0.0541082	0.0671343	0.0611222	0.0741483	0.0170341	0.0430862	Q9H124	EPHA7	Homo sapiens (Human).	Receptor tyrosine kinase which binds promiscuously GPI- anchored ephrin-A family ligands residing on adjacent cells, leading to contact-dependent bidirectional signaling into neighboring cells. The signaling pathway downstream of the receptor is referred to as forward signaling while the signaling pathway downstream of the ephrin ligand is referred to as reverse signaling. Among GPI-anchored ephr…	Heterotetramer upon binding of the ligand. The heterotetramer is composed of an ephrin dimer and a receptor dimer. Oligomerization is probably required to induce biological responses (By similarity). Interacts (via PDZ-binding motif) with GRIP1 and PICK1 (via PDZ domain) (By similarity).	P52793:Efna1 (xeno); NbExp=2; IntAct=EBI-1383428, EBI-5241529; P29317:EPHA2; NbExp=3; IntAct=EBI-1383428, EBI-702104;
ETHE1_HUMAN	Persulfide dioxygenase ETHE1, mitochondrial	ETHE1	1		42.7		60.3		27854.3	254	6.83364	1.76772	0.55374	-2.46747	-0.011811	34	0.133858	255.56	1.00614	255.92	1.00756	250.1	0.984646	0.0787402	0.0354331	0.0511811	0.0551181	0.0433071	0.0826772	0.0393701	0.0472441	0.019685	0.122047	0.019685	0.023622	0.0551181	0.0433071	0.0748031	0.0590551	0.0708661	0.0590551	0	0.019685	O95571	ETHE1	Homo sapiens (Human).	Sulfur dioxygenase that plays an essential role in hydrogen sulfide catabolism in the mitochondrial matrix. Hydrogen sulfide (H(2)S) is first oxidized by SQRDL, giving rise to cysteine persulfide residues. ETHE1 consumes molecular oxygen to catalyze the oxidation of the persulfide, once it has been transferred to a thiophilic acceptor, such as glutathione (R-SSH). Plays an important role in metab…	Monomer. Interacts with TST. May interact with RELA.	N/A
EZRI_HUMAN	Ezrin	EZR		0.9		2.9		2.9	69368.3	586	6.16917	2.47358	0.513362	-7.87573	-0.0153584	114	0.194539	639.5	1.0913	555.64	0.948191	572.51	0.97698	0.0665529	0.00341297	0.0580205	0.131399	0.0290102	0.0341297	0.0204778	0.0511945	0.0938567	0.0938567	0.0255973	0.0341297	0.0409556	0.0733788	0.0802048	0.0307167	0.0409556	0.0477816	0.0119454	0.0324232	P15311	EZR	Homo sapiens (Human).	Probably involved in connections of major cytoskeletal structures to the plasma membrane. In epithelial cells, required for the formation of microvilli and membrane ruffles on the apical pole. Along with PLEKHG6, required for normal macropinocytosis.	Interacts with MPP5 and SLC9A3R2. Found in a complex with EZR, PODXL and SLC9A3R2 (By similarity). Interacts with MCC, PLEKHG6, PODXL, SCYL3/PACE1, SLC9A3R1 and TMEM8B. Interacts (when phosphorylated) with FES/FPS. Interacts with dimeric S100P, the interaction may be activating through unmasking of F-actin binding sites.	P07384:CAPN1; NbExp=2; IntAct=EBI-1056902, EBI-1542113; P07332:FES; NbExp=8; IntAct=EBI-1056902, EBI-1055635; Q00987:MDM2; NbExp=3; IntAct=EBI-1056902, EBI-389668; Q8IZE3:SCYL3; NbExp=4; IntAct=EBI-1056902, EBI-1380680;
F13A_HUMAN	Coagulation factor XIII A chain	F13A1	1.1	1.1	0.8	0.8	1.1	0.8	83213.2	732	5.94751	1.91624	0.54168	-11.0534	-0.0163934	97	0.132514	733.57	1.00214	747.95	1.02179	739.64	1.01044	0.0505464	0.0122951	0.0642077	0.0655738	0.0437158	0.068306	0.0191257	0.0519126	0.0519126	0.0655738	0.0273224	0.0546448	0.045082	0.0368852	0.0614754	0.0628415	0.0614754	0.0969945	0.0204918	0.0396175	P00488	F13A1	Homo sapiens (Human).	Factor XIII is activated by thrombin and calcium ion to a transglutaminase that catalyzes the formation of gamma-glutamyl- epsilon-lysine cross-links between fibrin chains, thus stabilizing the fibrin clot. Also cross-link alpha-2-plasmin inhibitor, or fibronectin, to the alpha chains of fibrin.	Tetramer of two A chains and two B chains.	N/A
F13B_HUMAN	Coagulation factor XIII B chain	F13B	0.9	1	0.8	0.8	1	1	75459.3	661	6.35701	1.83496	0.53941	-10.177	-0.0151286	90	0.136157	639.44	0.967383	654.45	0.990091	689.3	1.04281	0.0272315	0.0605144	0.0332829	0.0922844	0.03177	0.0741301	0.0257186	0.0514372	0.0680787	0.0771558	0.0151286	0.0468986	0.0620272	0.0302572	0.0423601	0.0695915	0.0680787	0.0438729	0.0151286	0.065053	P05160	F13B	Homo sapiens (Human).	The B chain of factor XIII is not catalytically active, but is thought to stabilize the A subunits and regulate the rate of transglutaminase formation by thrombin.	Tetramer of two A chains and two B chains.	N/A
FA10_HUMAN	Coagulation factor X	F10	1	1	0.8	0.8	1	0.8	54695.5	488	5.74016	1.96951	0.528975	-9.18312	-0.0184426	71	0.145492	490.87	1.00588	472.12	0.967459	501.89	1.02846	0.0594262	0.0491803	0.0553279	0.0901639	0.0430328	0.0819672	0.0184426	0.0368852	0.067623	0.079918	0.0163934	0.0430328	0.0389344	0.0389344	0.0594262	0.0594262	0.0737705	0.0471311	0.0122951	0.0286885	P00742	F10	Homo sapiens (Human).	Factor Xa is a vitamin K-dependent glycoprotein that converts prothrombin to thrombin in the presence of factor Va, calcium and phospholipid during blood clotting.	The two chains are formed from a single-chain precursor by the excision of two Arg residues and are held together by 1 or more disulfide bonds. Forms a heterodimer with SERPINA5.	N/A
FA11_HUMAN	Coagulation factor XI	F11	1	1	0.6	0.6	0.7	0.9	70061.7	625	8.13854	1.7699	0.551424	11.4296	0.0176	92	0.1472	610.79	0.977264	643.5	1.0296	630.82	1.00931	0.048	0.0576	0.0448	0.0496	0.0464	0.0688	0.0352	0.0608	0.0656	0.0736	0.0096	0.0336	0.0384	0.0432	0.0464	0.0816	0.0848	0.0608	0.016	0.0352	P03951	F11	Homo sapiens (Human).	Factor XI triggers the middle phase of the intrinsic pathway of blood coagulation by activating factor IX.	Homodimer; disulfide-linked. Forms a heterodimer with SERPINA5. After activation the heavy and light chains are also linked by a disulfide bond.	P23827:eco (xeno); NbExp=3; IntAct=EBI-1041019, EBI-1029159;
FA12_HUMAN	Coagulation factor XII	F12	1	1	0.6	0.5	0.8	0.8	67745.9	615	7.76177	1.66818	0.54135	5.71277	0.00813008	86	0.139837	598.85	0.97374	599.5	0.974797	633.1	1.02943	0.0861789	0.0650407	0.0357724	0.0520325	0.0260163	0.0796748	0.0439024	0.0146341	0.0308943	0.099187	0.00813008	0.0211382	0.0910569	0.0601626	0.0650407	0.0617886	0.0569106	0.0504065	0.0211382	0.0308943	P00748	F12	Homo sapiens (Human).	Factor XII is a serum glycoprotein that participates in the initiation of blood coagulation, fibrinolysis, and the generation of bradykinin and angiotensin. Prekallikrein is cleaved by factor XII to form kallikrein, which then cleaves factor XII first to alpha-factor XIIa and then trypsin cleaves it to beta- factor XIIa. Alpha-factor XIIa activates factor XI to factor XIa.	Interacts with HRG; the interaction, which is enhanced in the presence of zinc ions and inhibited by heparin-binding, inhibits factor XII autoactivation and contact-initiated coagulation.	Q07021:C1QBP; NbExp=2; IntAct=EBI-6378830, EBI-347528;
FA49B_HUMAN	Protein FAM49B	FAM49B							36723.9	324	5.94524	1.92173	0.535957	-5.5431	-0.0185185	44	0.135802	338.62	1.04512	321.92	0.99358	317.11	0.978735	0.0709877	0.0154321	0.0401235	0.0925926	0.0432099	0.0432099	0.0216049	0.0401235	0.0648148	0.114198	0.0308642	0.0617284	0.0432099	0.0432099	0.0493827	0.0555556	0.0740741	0.0617284	0.00308642	0.0308642	Q9NUQ9	FAM49B	Homo sapiens (Human).	N/A	N/A	N/A
FA5_HUMAN	Coagulation factor V	F5	0.9	1.1	1	1.3	1.1	1.1	251539	2224	5.94809	1.77923	0.529739	-51.3953	-0.0256295	288	0.129496	2200.62	0.989487	2162.54	0.972365	2324.09	1.045	0.0436151	0.00899281	0.0598022	0.0642986	0.0350719	0.0521583	0.0310252	0.0553058	0.0571043	0.0908273	0.0242806	0.0499101	0.0678957	0.0463129	0.0413669	0.111061	0.0638489	0.0404676	0.0197842	0.0368705	P12259	F5	Homo sapiens (Human).	Central regulator of hemostasis. It serves as a critical cofactor for the prothrombinase activity of factor Xa that results in the activation of prothrombin to thrombin.	Factor Va, the activated form of factor V, is composed of a heavy chain and a light chain, non-covalently bound. The interaction between the two chains is calcium-dependent. Forms heterodimer with SERPINA5.	N/A
FA7_HUMAN	Coagulation factor VII	F7		1		0.4		1	51559.1	466	7.22994	1.79524	0.549056	-0.749813	-0.00214592	65	0.139485	459.5	0.986052	465.65	0.999249	472.37	1.01367	0.0579399	0.055794	0.0450644	0.0643777	0.0300429	0.0965665	0.0321888	0.0364807	0.0407725	0.100858	0.0128755	0.027897	0.0515021	0.0493562	0.0665236	0.0665236	0.0515021	0.0686695	0.0193133	0.0257511	P08709	F7	Homo sapiens (Human).	Initiates the extrinsic pathway of blood coagulation. Serine protease that circulates in the blood in a zymogen form. Factor VII is converted to factor VIIa by factor Xa, factor XIIa, factor IXa, or thrombin by minor proteolysis. In the presence of tissue factor and calcium ions, factor VIIa then converts factor X to factor Xa by limited proteolysis. Factor VIIa will also convert factor IX to fac…	Heterodimer of a light chain and a heavy chain linked by a disulfide bond.	P13726:F3; NbExp=5; IntAct=EBI-355972, EBI-1040727;
FA9_HUMAN	Coagulation factor IX	F9	1	1	0.9	1.1	1.2	1.1	51743.9	461	5.16124	1.79187	0.543623	-14.1002	-0.0303688	58	0.125813	457.94	0.993362	464.97	1.00861	468.26	1.01575	0.0477223	0.0520607	0.0412148	0.0932755	0.0455531	0.0780911	0.021692	0.0542299	0.0607375	0.0607375	0.0130152	0.0694143	0.032538	0.0303688	0.0433839	0.0585683	0.0672451	0.0802603	0.0151844	0.0347072	P00740	F9	Homo sapiens (Human).	Factor IX is a vitamin K-dependent plasma protein that participates in the intrinsic pathway of blood coagulation by converting factor X to its active form in the presence of Ca(2+) ions, phospholipids, and factor VIIIa.	Heterodimer of a light chain and a heavy chain; disulfide-linked.	N/A
FAT4_HUMAN	Protocadherin Fat 4	FAT4							542341	4981	4.53801	1.60805	0.532538	-224.027	-0.0461755	481	0.096567	4857.3	0.975166	5007.52	1.00532	5184.97	1.04095	0.0604296	0.0138526	0.0700663	0.0538045	0.0405541	0.0722746	0.0188717	0.0616342	0.0339289	0.077093	0.011845	0.0582212	0.0578197	0.0377434	0.0437663	0.0957639	0.0740815	0.0815097	0.00421602	0.0325236	Q6V0I7	FAT4	Homo sapiens (Human).	Cadherins are calcium-dependent cell adhesion proteins. FAT4 plays a role in the maintenance of planar cell polarity as well as in inhibition of YAP1-mediated neuroprogenitor cell proliferation and differentiation (By similarity).	Heterophilic interaction with DCHS1; this interaction affects their respective protein levels (By similarity). Interacts (via cytoplasmic domain) with MPDZ (By similarity). Forms a complex with MPP5 and MPDZ (By similarity).	Q9H2K2:TNKS2; NbExp=2; IntAct=EBI-948985, EBI-4398527;
FBLN1_HUMAN	Fibulin-1	FBLN1	1.1	1.1	0.8	0.8	0.8	0.6	77160.6	703	4.86171	1.67888	0.554566	-32.3101	-0.0440967	80	0.113798	673.65	0.95825	702.72	0.999602	730.33	1.03888	0.0469417	0.102418	0.0583215	0.0711238	0.0327169	0.0853485	0.0284495	0.0526316	0.0241821	0.0640114	0.0113798	0.0455192	0.0455192	0.0469417	0.0611664	0.0753912	0.0483642	0.0668563	0.00142248	0.0312945	Q9UC21	FBLN1	Homo sapiens (Human).	Incorporated into fibronectin-containing matrix fibers. May play a role in cell adhesion and migration along protein fibers within the extracellular matrix (ECM). Could be important for certain developmental processes and contribute to the supramolecular organization of ECM architecture, in particular to those of basement membranes. Has been implicated in a role in cellular transformation and tum…	Homomultimerizes and interacts with various extracellular matrix components such as FN1, LAMA1, LAMA2, NID, ACAN, CSPG2 and type IV collagen. Interacts also with APP, NOV, FGB and HPV type 16, HPV type 18, HPV type 31 and BPV type 1 E6 proteins. Interacts with FBLN7 (By similarity).	N/A
FBLN3_HUMAN	EGF-containing fibulin-like extracellular matrix protein 1	EFEMP1	1.4	1.4	1.2	1.6	1.1	2.1	54603.5	493	4.70359	1.64043	0.54213	-17.1087	-0.0324544	44	0.0892495	473.22	0.959878	500.33	1.01487	510.5	1.0355	0.0567951	0.0811359	0.0486815	0.0588235	0.030426	0.0649087	0.0141988	0.0588235	0.0223124	0.0507099	0.0223124	0.0588235	0.0588235	0.0730223	0.0527383	0.0730223	0.0669371	0.0608519	0.0040568	0.0425963	Q12805	EFEMP1	Homo sapiens (Human).	Binds EGFR, the EGF receptor, inducing EGFR autophosphorylation and the activation of downstream signaling pathways. May play a role in cell adhesion and migration. May function as a negative regulator of chondrocyte differentiation. In the olfactory epithelium, it may regulate glial cell migration, differentiation and the ability of glial cells to support neuronal neurite outgrowth.	Interacts with ECM1. Interacts with TIMP3.	Q9WMX2:- (xeno); NbExp=2; IntAct=EBI-536772, EBI-6863748; P10398:ARAF; NbExp=3; IntAct=EBI-536772, EBI-365961; P54259:ATN1; NbExp=3; IntAct=EBI-536772, EBI-945980;
FBX39_HUMAN	F-box only protein 39	FBXO39							52610.6	442	9.07361	2.17882	0.574615	14.4111	0.0316742	73	0.165158	456.11	1.03192	460.22	1.04122	422.16	0.955113	0.0384615	0.0316742	0.0384615	0.0701357	0.0542986	0.020362	0.0248869	0.0588235	0.061086	0.128959	0.0271493	0.0565611	0.0226244	0.0361991	0.0791855	0.0927602	0.0384615	0.0520362	0.0226244	0.0452489	Q8N4B4	FBXO39	Homo sapiens (Human).	Substrate-recognition component of the SCF (SKP1-CUL1-F- box protein)-type E3 ubiquitin ligase complex (By similarity).	Directly interacts with SKP1 and CUL1 (By similarity).	N/A
FCG3A_HUMAN	Low affinity immunoglobulin gamma Fc region receptor III-A	FCGR3A	0.9	0.9	0.8	1.1	1	1	29070	254	8.20969	1.74988	0.554449	2.51505	0.00787402	35	0.137795	253.29	0.997205	262.07	1.03177	254.38	1.0015	0.0472441	0.019685	0.0590551	0.0393701	0.0551181	0.0472441	0.0314961	0.0354331	0.0669291	0.110236	0.011811	0.0354331	0.0433071	0.0472441	0.0393701	0.102362	0.0669291	0.0708661	0.0314961	0.0393701	P08637	FCGR3A	Homo sapiens (Human).	Receptor for the Fc region of IgG. Binds complexed or aggregated IgG and also monomeric IgG. Mediates antibody-dependent cellular cytotoxicity (ADCC) and other antibody-dependent responses, such as phagocytosis.	Exists as a heterooligomeric receptor complex with Fc epsilon receptor I gamma subunit and / or the CD3 zeta subunit. Interacts with INPP5D/SHIP1 (By similarity).	N/A
FCGBP_HUMAN	IgGFc-binding protein	FCGBP	0.9	0.9	1	2.5	1.1	1.8	571628	5405	4.99002	1.33692	0.54555	-190.286	-0.0340426	471	0.0871415	5117.23	0.946759	5383.17	0.995961	5684.87	1.05178	0.0810361	0.080481	0.0497687	0.0455134	0.0301573	0.113414	0.0259019	0.0170213	0.0218316	0.0778908	0.00610546	0.0327475	0.0734505	0.0508788	0.039408	0.0695652	0.053654	0.0847364	0.0155412	0.0308973	Q9Y6R7	FCGBP	Homo sapiens (Human).	May be involved in the maintenance of the mucosal structure as a gel-like component of the mucosa.	Interacts with the Fc portion of IgG and with MUC2.	N/A
FCN3_HUMAN	Ficolin-3	FCN3	1	1	1	1.3	1	1.7	32881.1	299	6.66304	1.67057	0.543144	-3.466	-0.0133779	37	0.123746	288.57	0.965117	285.49	0.954816	316.56	1.05873	0.0668896	0.0301003	0.0434783	0.0602007	0.0367893	0.12709	0.0334448	0.0100334	0.0234114	0.117057	0.0167224	0.0401338	0.0769231	0.0334448	0.0668896	0.0769231	0.0301003	0.0434783	0.0334448	0.0334448	O75636	FCN3	Homo sapiens (Human).	May function in innate immunity through activation of the lectin complement pathway. Calcium-dependent and GlcNAc- binding lectin. Has affinity with GalNAc, GlcNAc, D-fucose, as mono/oligosaccharide and lipopolysaccharides from S.typhimurium and S.minnesota.	Homopolymer; disulfide-linked. May be an octadecamer consisting of an elementary trimer unit. Does not interact with fibronectin, elastin or zymosan. Interacts with MASP1 and MASP2.	N/A
FETUA_HUMAN	Alpha-2-HS-glycoprotein	AHSG	1.1	0.8	0.7	0.6	0.5	0.4	39298.7	367	5.52274	1.43223	0.530436	-12.4051	-0.0354223	41	0.111717	365.77	0.996649	357.87	0.975123	375.68	1.02365	0.100817	0.0381471	0.0517711	0.0599455	0.027248	0.0626703	0.0354223	0.0217984	0.0435967	0.0953678	0.00544959	0.0299728	0.106267	0.0517711	0.0326975	0.0599455	0.0544959	0.0953678	0.00817439	0.0190736	P02765	AHSG	Homo sapiens (Human).	Promotes endocytosis, possesses opsonic properties and influences the mineral phase of bone. Shows affinity for calcium and barium ions.	Alpha-2-HS glycoprotein derives from this precursor, when the connecting peptide is cleaved off. The two chains A and B are held together by a single disulfide bond.	P00519:ABL1; NbExp=1; IntAct=EBI-1223374, EBI-375543; O88736:Hsd17b7 (xeno); NbExp=1; IntAct=EBI-1223374, EBI-2552537;
FETUB_HUMAN	Fetuin-B	FETUB	0.8	0.8	0.7	0.7	0.8	0.9	42027.3	382	6.82878	1.66154	0.532723	-1.27823	-0.0026178	43	0.112565	376.89	0.986623	374.7	0.98089	397	1.03927	0.0680628	0.039267	0.0497382	0.0549738	0.0366492	0.0497382	0.0104712	0.0209424	0.0628272	0.112565	0.0157068	0.0497382	0.0811518	0.0471204	0.039267	0.0994764	0.052356	0.0680628	0.0078534	0.0340314	Q9UGM5	FETUB	Homo sapiens (Human).	Protease inhibitor required for egg fertilization. Required to prevent premature zona pellucida hardening before fertilization, probably by inhibiting the protease activity of ASTL, a protease that mediates the cleavage of ZP2 and triggers zona pellucida hardening (By similarity).	N/A	N/A
FGL2_HUMAN	Fibroleukin	FGL2	1	1	0.5	0.8	0.8	1.7	50195.7	439	7.42474	1.94437	0.53451	0.36542	0	66	0.150342	435.61	0.992278	432.13	0.984351	458.37	1.04412	0.047836	0.0250569	0.0569476	0.0728929	0.0410023	0.0751708	0.0205011	0.0318907	0.0797267	0.0933941	0.0159453	0.0751708	0.0410023	0.0318907	0.0501139	0.0683371	0.0387244	0.0615034	0.0205011	0.0523918	Q14314	FGL2	Homo sapiens (Human).	May play a role in physiologic lymphocyte functions at mucosal sites.	Homotetramer; disulfide-linked.	N/A
FHAD1_HUMAN	Forkhead-associated domain-containing protein 1	FHAD1							161800	1412	6.93013	2.28778	0.507188	-5.64946	-0.00566572	263	0.186261	1537.5	1.08888	1322.34	0.936501	1394.91	0.987897	0.065864	0.0106232	0.0446176	0.126062	0.0155807	0.0318697	0.0212465	0.0432011	0.106941	0.107649	0.0247875	0.0368272	0.0325779	0.0856941	0.0580737	0.0786119	0.0389518	0.0538244	0.00424929	0.0127479	B1AJZ9	FHAD1	Homo sapiens (Human).	N/A	N/A	N/A
FHR1_HUMAN	Complement factor H-related protein 1	CFHR1	1	1	1.5	1.5	1.3	0.6	37625.2	330	7.42436	1.86624	0.539727	0.681315	0.0030303	42	0.127273	313.19	0.949061	327.46	0.992303	347.81	1.05397	0.0242424	0.0606061	0.0272727	0.0787879	0.0363636	0.0636364	0.0181818	0.0484848	0.0484848	0.0606061	0.0151515	0.0545455	0.0757576	0.0363636	0.0606061	0.0969697	0.069697	0.0515152	0.0242424	0.0484848	Q03591	CFHR1	Homo sapiens (Human).	Involved in complement regulation. The dimerized forms have avidity for tissue-bound complement fragments and efficiently compete with the physiological complement inhibitor CFH. Can associate with lipoproteins and may play a role in lipid metabolism.	Head-to-tail homodimer and heterodimer with CFHR2 or CFHR5.	N/A
FHR2_HUMAN	Complement factor H-related protein 2	CFHR2	1	0.9	1.1	1.1	1.1	1.1	30630	270	6.33542	1.67752	0.545074	-3.23814	-0.0111111	30	0.111111	257.31	0.953	271.04	1.00385	283.43	1.04974	0.0185185	0.0592593	0.0259259	0.0777778	0.0444444	0.0666667	0.0185185	0.062963	0.0592593	0.0592593	0.0148148	0.0592593	0.0703704	0.0481481	0.0333333	0.103704	0.0518519	0.0555556	0.0222222	0.0481481	P36980	CFHR2	Homo sapiens (Human).	Involved in complement regulation. The dimerized forms have avidity for tissue-bound complement fragments and efficiently compete with the physiological complement inhibitor CFH. Can associate with lipoproteins and may play a role in lipid metabolism.	Head-to-tail homodimer and heterodimer with CFHR1 or CFHR5.	N/A
FHR3_HUMAN	Complement factor H-related protein 3	CFHR3		1		2.1		2.8	37297.9	330	7.58744	1.68773	0.541061	1.61884	0.00606061	38	0.115152	307.76	0.932606	333.56	1.01079	351.31	1.06458	0.0333333	0.0636364	0.0272727	0.0636364	0.030303	0.0757576	0.0181818	0.0666667	0.0575758	0.0515152	0.0121212	0.0666667	0.0727273	0.0393939	0.0393939	0.0848485	0.0575758	0.0484848	0.0181818	0.0727273	Q02985	CFHR3	Homo sapiens (Human).	Might be involved in complement regulation.	N/A	N/A
FHR5_HUMAN	Complement factor H-related protein 5	CFHR5	1.1	1.1	1.3	1.4	1.7	2.4	64375.7	569	7.07573	1.7255	0.541511	-1.55874	-0.00175747	70	0.123023	542.04	0.952619	573.55	1.008	596.02	1.04749	0.0228471	0.0632689	0.029877	0.0755712	0.0404218	0.0667838	0.0193322	0.056239	0.0650264	0.0527241	0.0140598	0.0650264	0.0790861	0.0421793	0.0386643	0.0738137	0.056239	0.0755712	0.0193322	0.0439367	Q9BXR6	CFHR5	Homo sapiens (Human).	Involved in complement regulation. The dimerized forms have avidity for tissue-bound complement fragments and efficiently compete with the physiological complement inhibitor CFH.	Head-to-tail homodimer and heterodimer with CFHR1 or CFHR2. Binds C3b in vitro.	N/A
FIBA_HUMAN	Fibrinogen alpha chain	FGA	1	0.9	0.6	0.5	0.6	0.6	94912.4	866	5.86634	1.86883	0.511905	-15.7436	-0.0196305	116	0.133949	830.72	0.959261	813.12	0.938938	951.2	1.09838	0.0427252	0.0150115	0.0577367	0.073903	0.0334873	0.112009	0.02194	0.0300231	0.0496536	0.056582	0.017321	0.051963	0.0473441	0.034642	0.0623557	0.123557	0.0681293	0.051963	0.02194	0.0277136	P02671	FGA	Homo sapiens (Human).	Fibrinogen has a double function: yielding monomers that polymerize into fibrin and acting as a cofactor in platelet aggregation.	Heterohexamer; disulfide linked. Contains 2 sets of 3 non-identical chains (alpha, beta and gamma). The 2 heterotrimers are in head to head conformation with the N-termini in a small central domain.	N/A
FIBB_HUMAN	Fibrinogen beta chain	FGB	1	0.9	0.5	0.3	0.6	0.5	55891.2	491	8.38412	1.97566	0.525845	6.32102	0.01222	73	0.148676	485.25	0.988289	479.71	0.977006	516.61	1.05216	0.0468432	0.0244399	0.0570265	0.0610998	0.0244399	0.0855397	0.0183299	0.0325866	0.0733198	0.0733198	0.0366599	0.0651731	0.0468432	0.0529532	0.0570265	0.0692464	0.0468432	0.0570265	0.0285132	0.0427699	P02675	FGB	Homo sapiens (Human).	Fibrinogen has a double function: yielding monomers that polymerize into fibrin and acting as a cofactor in platelet aggregation.	Heterohexamer; disulfide linked. Contains 2 sets of 3 non-identical chains (alpha, beta and gamma). The 2 heterotrimers are in head to head conformation with the N-termini in a small central domain (By similarity).	P27958:- (xeno); NbExp=4; IntAct=EBI-1034445, EBI-6377335;
FIBG_HUMAN	Fibrinogen gamma chain	FGG	0.9	0.9	0.5	0.6	0.6	0.6	51477.7	453	5.31865	1.74139	0.532715	-13.3666	-0.0309051	58	0.128035	452.12	0.998057	449.48	0.99223	469.09	1.03552	0.0618102	0.0242826	0.0750552	0.0573951	0.0441501	0.0750552	0.0264901	0.0573951	0.0750552	0.0750552	0.0198675	0.0529801	0.0331126	0.0529801	0.0264901	0.0662252	0.0662252	0.0331126	0.0242826	0.0529801	Q9UC63	FGG	Homo sapiens (Human).	Fibrinogen has a double function: yielding monomers that polymerize into fibrin and acting as a cofactor in platelet aggregation.	Heterohexamer; disulfide linked. Contains 2 sets of 3 non-identical chains (alpha, beta and gamma). The 2 heterotrimers are in head to head conformation with the N-termini in a small central domain (By similarity).	N/A
FINC_HUMAN	Fibronectin	FN1	0.6	0.6	1.7	2.5	1.4	1.8	262455	2386	5.45099	1.69221	0.51728	-53.9711	-0.0234702	254	0.106454	2256.2	0.945599	2392.26	1.00262	2529.79	1.06026	0.0410729	0.026404	0.0498743	0.0586756	0.0213747	0.0834032	0.0213747	0.0461023	0.0326907	0.0540654	0.011316	0.041492	0.0792121	0.0540654	0.0523889	0.0800503	0.107712	0.0804694	0.0163453	0.0419111	Q96KP7	FN1	Homo sapiens (Human).	Fibronectins bind cell surfaces and various compounds including collagen, fibrin, heparin, DNA, and actin. Fibronectins are involved in cell adhesion, cell motility, opsonization, wound healing, and maintenance of cell shape. Involved in osteoblast compaction through the fibronectin fibrillogenesis cell-mediated matrix assembly process, essential for osteoblast mineralization. Participates in the…	Mostly heterodimers or multimers of alternatively spliced variants, connected by 2 disulfide bonds near the carboxyl ends; to a lesser extent homodimers. Interacts with FBLN1, AMBP, TNR, LGALS3BP and COL13A1. Interacts with FBLN7 (By similarity). Interacts with COMP. Interacts with S.aureus fnbA. Interacts with TNR; the interaction inhibits cell adhesion and neurite outgrowth (By similarity). Int…	Q99IB8:- (xeno); NbExp=3; IntAct=EBI-1220319, EBI-6927928; P29279:CTGF; NbExp=5; IntAct=EBI-1220319, EBI-2835375; P14738:fnbA (xeno); NbExp=18; IntAct=EBI-1220319, EBI-8398157; Q53682:fnbB (xeno); NbExp=19; IntAct=EBI-1220319, EBI-8398005; P06241:FYN; NbExp=2; IntAct=EBI-7133890, EBI-515315; P08519:LPA; NbExp=2; IntAct=EBI-1220319, EBI-9232288; P11684:SCGB1A1; NbExp=3; IntAct=EBI-1220319, EBI-779…
FKB1A_HUMAN	Peptidyl-prolyl cis-trans isomerase FKBP1A	FKBP1A	1	1	1.5	1.4	1.5	1.4	11942.8	108	8.4819	1.89602	0.526667	1.23725	0.00925926	17	0.157407	107.88	0.998889	106.63	0.987315	111.21	1.02972	0.0462963	0.00925926	0.0555556	0.0648148	0.0462963	0.12037	0.0277778	0.0462963	0.0740741	0.0648148	0.037037	0.00925926	0.0648148	0.0462963	0.0555556	0.0462963	0.0648148	0.0833333	0.00925926	0.0277778	P62942	FKBP1A	Homo sapiens (Human).	Keeps in an inactive conformation TGFBR1, the TGF-beta type I serine/threonine kinase receptor, preventing TGF-beta receptor activation in absence of ligand. Recruites SMAD7 to ACVR1B which prevents the association of SMAD2 and SMAD3 with the activin receptor complex, thereby blocking the activin signal. May modulate the RYR1 calcium channel activity. PPIases accelerate the folding of proteins. I…	Interacts directly with RYR1, RYR2 and RYR3. Identified in a complex composed of RYR1, PDE4D, PKA, FKBP1A and protein phosphatase 1 (PP1) (By similarity). Interacts with TGFBR1; prevents TGFBR1 phosphorylation by TGFBR2 and stabilizes it in the inactive conformation. Interacts with ACVR1B and SMAD7.	P36896:ACVR1B; NbExp=2; IntAct=EBI-1027571, EBI-1384128; P42345:MTOR; NbExp=2; IntAct=EBI-1027571, EBI-359260; O15105:SMAD7; NbExp=3; IntAct=EBI-1027571, EBI-3861591;
FLNA_HUMAN	Filamin-A	FLNA	1	1	1	0.9	1.5	1.2	280558	2647	5.95278	1.55556	0.517631	-49.9832	-0.0204005	318	0.120136	2564.04	0.968659	2598.08	0.981519	2811.03	1.06197	0.0717794	0.0181337	0.0555346	0.0604458	0.0287117	0.114469	0.0245561	0.0426898	0.0604458	0.0528901	0.0109558	0.0294673	0.0793351	0.0355119	0.0351341	0.0698904	0.0661126	0.105402	0.00642236	0.0321118	P21333	FLNA	Homo sapiens (Human).	Promotes orthogonal branching of actin filaments and links actin filaments to membrane glycoproteins. Anchors various transmembrane proteins to the actin cytoskeleton and serves as a scaffold for a wide range of cytoplasmic signaling proteins. Interaction with FLNA may allow neuroblast migration from the ventricular zone into the cortical plate. Tethers cell surface- localized furin, modulates it…	Homodimer. Interacts with PDLIM2 (By similarity). Interacts with FCGR1A, FLNB, FURIN, HSPB7, INPPL1, KCND2, MYOT, MYOZ1, ARHGAP24, PSEN1, PSEN2 and ECSCR. Interacts also with various other binding partners in addition to filamentous actin. Interacts (via N-terminus) with MIS18BP1 (via N-terminus). Interacts (via N-terminus) with TAF1B. Interacts with TMEM67 (via C-terminus) and MKS1. Interacts (v…	Q9WMX2:- (xeno); NbExp=6; IntAct=EBI-350432, EBI-6863748; Q8N264:ARHGAP24; NbExp=6; IntAct=EBI-350432, EBI-988764; O95067:CCNB2; NbExp=8; IntAct=EBI-350432, EBI-375024; P46108:CRK; NbExp=2; IntAct=EBI-350432, EBI-886; O75369:FLNB; NbExp=5; IntAct=EBI-350432, EBI-352089; Q12948:FOXC1; NbExp=8; IntAct=EBI-350432, EBI-1175253; P62993:GRB2; NbExp=2; IntAct=EBI-350432, EBI-401755; P05556:ITGB1; NbExp=…
FRIL_HUMAN	Ferritin light chain	FTL							20006.5	175	5.59073	2.01337	0.539943	-6.38335	-0.04	29	0.165714	187.36	1.07063	167.47	0.956971	172.1	0.983429	0.0857143	0.00571429	0.0742857	0.0914286	0.0457143	0.0685714	0.04	0.0171429	0.0685714	0.154286	0.0285714	0.0342857	0.0228571	0.04	0.0571429	0.0457143	0.04	0.0342857	0.00571429	0.04	Q9BTZ8	FTL	Homo sapiens (Human).	Stores iron in a soluble, non-toxic, readily available form. Important for iron homeostasis. Iron is taken up in the ferrous form and deposited as ferric hydroxides after oxidation. Also plays a role in delivery of iron to cells. Mediates iron uptake in capsule cells of the developing kidney (By similarity).	Oligomer of 24 subunits. There are two types of subunits: L (light) chain and H (heavy) chain. The major chain can be light or heavy, depending on the species and tissue type. The functional molecule forms a roughly spherical shell with a diameter of 12 nm and contains a central cavity into which the insoluble mineral iron core is deposited. Iron enters the spherical protein shell through pores t…	Self; NbExp=5; IntAct=EBI-713279, EBI-713279; P02794:FTH1; NbExp=3; IntAct=EBI-713279, EBI-713259; P42858:HTT; NbExp=2; IntAct=EBI-713279, EBI-466029; P43490:NAMPT; NbExp=3; IntAct=EBI-713279, EBI-2829310; Q9NZ42:PSENEN; NbExp=4; IntAct=EBI-713279, EBI-998468;
FSCN1_HUMAN	Fascin	FSCN1	1						54495.1	493	7.25776	1.90185	0.530913	-0.444185	-0.0020284	72	0.146045	499.3	1.01278	486.43	0.986673	503.17	1.02063	0.10142	0.0223124	0.0689655	0.0567951	0.0486815	0.0791075	0.0223124	0.0344828	0.0567951	0.0689655	0.00811359	0.0344828	0.030426	0.040568	0.0669371	0.0750507	0.0689655	0.0669371	0.0162272	0.0324544	Q16658	FSCN1	Homo sapiens (Human).	Organizes filamentous actin into bundles with a minimum of 4.1:1 actin/fascin ratio. Plays a role in the organization of actin filament bundles and the formation of microspikes, membrane ruffles, and stress fibers. Important for the formation of a diverse set of cell protrusions, such as filopodia, and for cell motility and migration.	Associates with beta-catenin. Interacts with PLXNB3.	Q9BXW9:FANCD2; NbExp=6; IntAct=EBI-351076, EBI-359343; P40692:MLH1; NbExp=7; IntAct=EBI-351076, EBI-744248; Q9ULL4:PLXNB3; NbExp=2; IntAct=EBI-351076, EBI-311073; P63104:YWHAZ; NbExp=3; IntAct=EBI-351076, EBI-347088;
FSTL1_HUMAN	Follistatin-related protein 1	FSTL1							34962.3	308	5.19213	1.9824	0.532338	-8.3883	-0.025974	46	0.149351	317.02	1.02929	297.5	0.965909	311.42	1.0111	0.0714286	0.0649351	0.0551948	0.103896	0.0292208	0.0487013	0.0162338	0.038961	0.0844156	0.0779221	0.00974026	0.0551948	0.0324675	0.0422078	0.0487013	0.0616883	0.0551948	0.0551948	0.0227273	0.025974	Q12841	FSTL1	Homo sapiens (Human).	May modulate the action of some growth factors on cell proliferation and differentiation. Binds heparin (By similarity).	Interacts with SCN10A.	P12643:BMP2; NbExp=2; IntAct=EBI-2349801, EBI-1029262; P08571:CD14; NbExp=3; IntAct=EBI-2349801, EBI-3905196; Q14689:DIP2A; NbExp=4; IntAct=EBI-2349801, EBI-2564275; A4D1W7:INHBA; NbExp=2; IntAct=EBI-2349801, EBI-8307749; P01137:TGFB1; NbExp=2; IntAct=EBI-2349801, EBI-779636;
FUCO2_HUMAN	Plasma alpha-L-fucosidase	FUCA2		1.1		1.2		1.2	54030.8	467	6.19595	1.68317	0.55863	-8.04574	-0.0192719	55	0.117773	467.31	1.00066	474.01	1.01501	465.06	0.995846	0.0492505	0.012848	0.0428266	0.0663812	0.0578158	0.0728051	0.0278373	0.0449679	0.0535332	0.111349	0.0149893	0.0428266	0.0685225	0.0364026	0.0364026	0.0620985	0.0535332	0.0513919	0.0535332	0.0406852	Q9BTY2	FUCA2	Homo sapiens (Human).	Alpha-L-fucosidase is responsible for hydrolyzing the alpha-1,6-linked fucose joined to the reducing-end N- acetylglucosamine of the carbohydrate moieties of glycoproteins.	Homotetramer (By similarity).	N/A
FUCO_HUMAN	Tissue alpha-L-fucosidase	FUCA1	1	1	0.4	0.9	0.9	1.2	53653.5	466	6.84224	1.72393	0.551266	-3.00811	-0.00858369	59	0.126609	460	0.987124	466.67	1.00144	475.7	1.02082	0.055794	0.0107296	0.0536481	0.0536481	0.0515021	0.0729614	0.027897	0.0364807	0.0536481	0.0944206	0.0150215	0.0407725	0.0751073	0.0300429	0.0450644	0.0751073	0.0536481	0.055794	0.0579399	0.0407725	P04066	FUCA1	Homo sapiens (Human).	Alpha-L-fucosidase is responsible for hydrolyzing the alpha-1,6-linked fucose joined to the reducing-end N- acetylglucosamine of the carbohydrate moieties of glycoproteins.	Homotetramer.	N/A
G3BP1_HUMAN	Ras GTPase-activating protein-binding protein 1	G3BP1							52130.9	466	5.2114	2.00923	0.507124	-14.8684	-0.0343348	68	0.145923	465.62	0.999185	435.95	0.935515	494.81	1.06182	0.0472103	0.00214592	0.0515021	0.103004	0.0407725	0.083691	0.0257511	0.0300429	0.0407725	0.0536481	0.0236052	0.0450644	0.10515	0.0643777	0.0793991	0.0579399	0.0300429	0.0944206	0.00214592	0.0193133	Q13283	G3BP1	Homo sapiens (Human).	May be a regulated effector of stress granule assembly. Phosphorylation-dependent sequence-specific endoribonuclease in vitro. Cleaves exclusively between cytosine and adenine and cleaves MYC mRNA preferentially at the 3'-UTR. ATP- and magnesium- dependent helicase. Unwinds preferentially partial DNA and RNA duplexes having a 17 bp annealed portion and either a hanging 3' tail or hanging tails at…	Binds to the SH3 domain of Ras GTPase-activating protein (RASA1) in proliferating cells. No interaction in quiescent cells Component of a TAU mRNP complex, at least composed of IGF2BP1, ELAVL4 and G3BP1 (By similarity). Interacts with USP10, and may regulate it. Forms homodimers and oligomers. Interacts with RPTOR and SPAG5; this complex is increased by oxidative stress.	Q99700:ATXN2; NbExp=4; IntAct=EBI-1047359, EBI-697691; Q8WWM7:ATXN2L; NbExp=5; IntAct=EBI-1047359, EBI-948363; Q8N122:RPTOR; NbExp=4; IntAct=EBI-1047359, EBI-1567928; Q7KZF4:SND1; NbExp=3; IntAct=EBI-1047359, EBI-1044112;
G6PE_HUMAN	GDH/6PGL endoplasmic bifunctional protein	H6PD	1	1	1.3	1.2	1.3	1.1	88833.6	791	7.31293	1.72855	0.556346	-1.19281	-0.00505689	109	0.1378	816.61	1.03238	793.57	1.00325	770.83	0.974501	0.0884956	0.0126422	0.0379267	0.0606827	0.0480405	0.068268	0.0442478	0.0328698	0.034134	0.126422	0.0214918	0.0252845	0.0581542	0.0657396	0.0594185	0.0745891	0.0290771	0.0644753	0.0176991	0.0303413	O95479	H6PD	Homo sapiens (Human).	Oxidizes glucose-6-phosphate and glucose, as well as other hexose-6-phosphates.	N/A	N/A
G6PI_HUMAN	Glucose-6-phosphate isomerase	GPI	1	1	5.4	1.9	4	1.8	63105.5	558	8.554	1.8295	0.544642	4.77953	0.00537634	83	0.148746	571.77	1.02468	565.02	1.01258	549.54	0.984839	0.0716846	0.00716846	0.0483871	0.0573477	0.0501792	0.0734767	0.0376344	0.0573477	0.062724	0.0949821	0.0268817	0.0501792	0.0394265	0.0519713	0.0483871	0.0519713	0.0663082	0.0573477	0.0215054	0.0250896	P06744	GPI	Homo sapiens (Human).	Besides it's role as a glycolytic enzyme, mammalian GPI can function as a tumor-secreted cytokine and an angiogenic factor (AMF) that stimulates endothelial cell motility. GPI is also a neurotrophic factor (Neuroleukin) for spinal and sensory neurons.	Homodimer in the catalytically active form, monomer in the secreted form.	N/A
GAPR1_HUMAN	Golgi-associated plant pathogenesis-related protein 1	GLIPR2	1		0.9		0.7		17207.1	154	9.91595	1.84916	0.517792	7.3741	0.0454545	26	0.168831	154.4	1.0026	147.44	0.957403	162.61	1.05591	0.0844156	0.012987	0.0194805	0.0714286	0.0519481	0.0844156	0.0324675	0.012987	0.0974026	0.0519481	0.0194805	0.0714286	0.0454545	0.0519481	0.038961	0.0909091	0.038961	0.0649351	0.0194805	0.038961	Q9H4G4	GLIPR2	Homo sapiens (Human).	N/A	Homodimer. Interacts with CAV1.	N/A
GDIR1_HUMAN	Rho GDP-dissociation inhibitor 1	ARHGDIA	0.8	0.8	1.9	0.8	1.5	0.5	23192.3	204	4.74092	2.03917	0.515343	-8.73909	-0.0441176	31	0.151961	213.07	1.04446	195.04	0.956078	208.59	1.0225	0.0637255	0.00490196	0.0735294	0.107843	0.0245098	0.0539216	0.0147059	0.0490196	0.0931373	0.0784314	0.0196078	0.0294118	0.0490196	0.0392157	0.0441176	0.0735294	0.0490196	0.0735294	0.0147059	0.0441176	P52565	ARHGDIA	Homo sapiens (Human).	Controls Rho proteins homeostasis. Regulates the GDP/GTP exchange reaction of the Rho proteins by inhibiting the dissociation of GDP from them, and the subsequent binding of GTP to them. Retains Rho proteins such as CDC42, RAC1 and RHOA in an inactive cytosolic pool, regulating their stability and protecting them from degradation. Actively involved in the recycling and distribution of activated R…	Monomer. Interacts with FER. Interacts with PLXNB3 (By similarity). Forms a heterodimer with RAC1. Interacts with RHOA, the affinity is increased by three orders of magnitude when RHOA is prenylated. Interacts with PSMD10; the interaction increases ARHGDIA association with RHOA, leading to ARHGDIA-mediated inactivation of RHOA and ROCK and prolonged AKT activation. Interacts with RHOC and CDC42.	P63000:RAC1; NbExp=6; IntAct=EBI-712693, EBI-413628; P61586:RHOA; NbExp=2; IntAct=EBI-712693, EBI-446668;
GDIR2_HUMAN	Rho GDP-dissociation inhibitor 2	ARHGDIB	1	1	1	0.7	1.2	1.1	22973.1	201	4.84324	2.02448	0.508259	-9.55713	-0.0497512	34	0.169154	207.16	1.03065	189.81	0.944328	209.25	1.04104	0.0348259	0.00497512	0.0895522	0.104478	0.0248756	0.0547264	0.0248756	0.0298507	0.114428	0.0895522	0.0248756	0.0248756	0.0696517	0.0199005	0.0298507	0.0497512	0.0746269	0.079602	0.0149254	0.039801	P52566	ARHGDIB	Homo sapiens (Human).	Regulates the GDP/GTP exchange reaction of the Rho proteins by inhibiting the dissociation of GDP from them, and the subsequent binding of GTP to them.	Interacts with RHOA.	N/A
GELS_HUMAN	Gelsolin	GSN	0.8	1	0.6	0.5	0.5	0.5	85642.8	782	6.19046	1.77904	0.524885	-8.95461	-0.0127877	101	0.129156	798.96	1.02169	763.09	0.975818	796.74	1.01885	0.103581	0.00895141	0.0588235	0.0652174	0.0396419	0.0907928	0.0179028	0.0294118	0.0575448	0.0818414	0.016624	0.0358056	0.0537084	0.0524297	0.0537084	0.0588235	0.0524297	0.0754476	0.0191816	0.028133	Q8WVV7	GSN	Homo sapiens (Human).	Calcium-regulated, actin-modulating protein that binds to the plus (or barbed) ends of actin monomers or filaments, preventing monomer exchange (end-blocking or capping). It can promote the assembly of monomers into filaments (nucleation) as well as sever filaments already formed. Plays a role in ciliogenesis.	Binds to actin and to fibronectin. Identified in a complex composed of ACTA1, COBL, GSN AND TMSB4X. Interacts with the inactive form of EIF2AK2/PKR (By similarity).	P49407:ARRB1; NbExp=3; IntAct=EBI-351506, EBI-743313; P32121:ARRB2; NbExp=3; IntAct=EBI-351506, EBI-714559;
GGCT_HUMAN	Gamma-glutamylcyclotransferase	GGCT	0.2	0.7	12.7	6.5	13.3	10.8	20994	188	4.78828	1.75106	0.524468	-5.97425	-0.0319149	22	0.117021	190.21	1.01176	184.11	0.979309	193.66	1.03011	0.0531915	0.0212766	0.0425532	0.0957447	0.037234	0.0851064	0.0106383	0.0585106	0.0851064	0.0691489	0.0265957	0.0531915	0.0425532	0.0478723	0.0212766	0.0744681	0.0585106	0.0585106	0.0159574	0.0425532	O75223	GGCT	Homo sapiens (Human).	Catalyzes the formation of 5-oxoproline from gamma- glutamyl dipeptides and may play a significant role in glutathione homeostasis. Induces release of cytochrome c from mitochondria with resultant induction of apoptosis.	Homodimer (Probable).	N/A
[truncated: 295 more rows]
[truncated: 9 more columns]
